# Supplementary material for: Metagenomic identification of active methanogens and methanotrophs in serpentinite springs of the Voltri Massif, Italy
Source: PeerJ. 2017 Jan 26;5:e2945. doi: 10.7717/peerj.2945 (PMC5274519; doi:10.7717/peerj.2945)
Supplement: File S1 [file peerj-05-2945-s001.xlsx]

## Sheet: percent
mothur rankID	Bacterial family	All samples	BR2-river-2012a	BR2-river-2012b	GOR34-spring1-2011	GOR34-river-2012a	GOR34-river-2012b	GOR34-spring1-2013a	GOR34-spring1-2013b	GOR34-river-2013a	GOR34-river-2013b
0	All families	617142	52045	45787	15056	71285	79012	73829	107493	91952	80683
0.1.45.6.5.5	Bacteria;Proteobacteria;Betaproteobacteria;Burkholderiales;Comamonadaceae	0.285134	0.072053	0.0916636	0.140741	0.344224	0.323862	0.354644	0.396286	0.290554	0.251317
0.1.7.6.1.3	Bacteria;Bacteroidetes;Flavobacteriia;Flavobacteriales;Flavobacteriaceae	0.0828675	0.0312806	0.0409942	0.000996281	0.26488	0.283286	9.48137e-05	3.72117e-05	0.0418588	0.0309359
0.1.45.6.5.2	Bacteria;Proteobacteria;Betaproteobacteria;Burkholderiales;Burkholderiaceae	0.0615612	0.00288212	0.00382205	0.000996281	0.068668	0.0372855	0.000297986	0.000409329	0.189131	0.153118
0.1.7.4.1.13	Bacteria;Bacteroidetes;Bacteroidia;Bacteroidales;ML635J-40_aquatic_group	0.0506399	0	0	0.188031	0.00506418	0.00534096	0.181636	0.129832	0.00174004	0.00138815
0.1.45.4.21.17	Bacteria;Proteobacteria;Alphaproteobacteria;Sphingomonadales;Sphingomonadaceae	0.0434665	0.00979921	0.0157468	0.00850159	0.00404012	0.00410064	0.0020859	0.00194431	0.131319	0.153886
0.1.13.20.1.1	Bacteria;Candidate_division_OD1;uncultured_bacterium;unclassified;unclassified	0.0319392	0.0211932	0.00366916	0.207558	0.00976362	0.00835316	0.049127	0.0838194	0.00688403	0.00853959
0.1.32.2.7.4	Bacteria;Firmicutes;Clostridia;Thermoanaerobacterales;SRB2	0.0302167	1.92141e-05	0	0.115569	0.00639686	0.00961879	0.0898021	0.0838659	0.000261006	0.000272672
0.1.44.10.2.1	Bacteria;Planctomycetes;Planctomycetacia;Planctomycetales;Planctomycetaceae	0.020138	0.0345278	0.0461922	0.00617694	0.0259522	0.0226168	0.0043208	0.00247458	0.0202171	0.0290272
0.1.2.2.11.15	Bacteria;Actinobacteria;Actinobacteria;Micrococcales;Microbacteriaceae	0.0186278	0.000922279	0.00104833	6.64187e-05	0.00937084	0.0089227	8.12689e-05	1.86059e-05	0.044458	0.0734975
0.1.45.11.33.8	Bacteria;Proteobacteria;Gammaproteobacteria;Methylococcales;Methylococcaceae	0.0176945	0.00240177	0.00259899	0.0433714	0.00200603	0.00235407	0.0575384	0.0505149	8.70019e-05	9.91535e-05
0.1.32.2.2.1	Bacteria;Firmicutes;Clostridia;Clostridiales;Caldicoprobacteraceae	0.0153125	0	0	0.0366631	0.00127657	0.00236673	0.0499668	0.0457332	0.000152253	1.23942e-05
0.1.2.2.8.6	Bacteria;Actinobacteria;Actinobacteria;Frankiales;Sporichthyaceae	0.0142755	7.68566e-05	6.55208e-05	0	0.00194992	0.00213892	1.35448e-05	9.30293e-06	0.0594549	0.0375048
0.1.63.1.1.1	Bacteria;unclassified;unclassified;unclassified;unclassified	0.0134264	0.0327025	0.0267762	0.0255712	0.0110121	0.013074	0.00631188	0.0118798	0.00866757	0.00762242
0.1.7.5.1.2	Bacteria;Bacteroidetes;Cytophagia;Cytophagales;Cytophagaceae	0.0119843	0.0202709	0.0256405	0.0109591	0.00772954	0.00706222	0.00330493	0.00736792	0.0209675	0.0115142
0.1.45.11.54.5	Bacteria;Proteobacteria;Gammaproteobacteria;Xanthomonadales;Xanthomonadaceae	0.0110461	0.00622538	0.00984996	0.00737248	0.00272147	0.00226548	0.0208184	0.0315183	0.00270793	0.00475937
0.1.45.7.14.1	Bacteria;Proteobacteria;Deltaproteobacteria;Myxococcales;0319-6G20	0.0107577	0.070439	0.0278245	0.00518066	0.00709827	0.00897332	0.000311531	0.00076284	0.00180529	0.00167321
0.1.7.16.1.1	Bacteria;Bacteroidetes;unclassified;unclassified;unclassified	0.0100171	0.00666731	0.00762225	0.00916578	0.00533071	0.00668253	0.0413794	0.0106798	0.00164216	0.0010659
0.1.7.13.1.5	Bacteria;Bacteroidetes;Sphingobacteriia;Sphingobacteriales;Chitinophagaceae	0.00941436	0.00662888	0.0106362	0.0021254	0.00479764	0.00591049	0.000257351	0.00022327	0.0253393	0.0218633
0.1.45.23.1.1	Bacteria;Proteobacteria;unclassified;unclassified;unclassified	0.00770325	0.0174272	0.0126674	0.00265675	0.00767342	0.0152382	0.000853323	0.00250249	0.00739516	0.0057509
0.1.32.2.2.6	Bacteria;Firmicutes;Clostridia;Clostridiales;Clostridiaceae_4	0.00760765	0	0	0.00916578	0.00148699	0.00154407	0.0124748	0.0316393	3.26257e-05	4.95767e-05
0.1.45.11.56.1	Bacteria;Proteobacteria;Gammaproteobacteria;unclassified;unclassified	0.00717339	0.0136613	0.0141306	0.00232465	0.00771551	0.00763175	0.00824879	0.00504219	0.00352358	0.00503204
0.1.45.11.31.2	Bacteria;Proteobacteria;Gammaproteobacteria;Legionellales;Legionellaceae	0.00688334	0.0215583	0.016817	0.000996281	0.00507821	0.00413861	0.000189627	8.37264e-05	0.00636201	0.0129395
0.1.7.4.1.14	Bacteria;Bacteroidetes;Bacteroidia;Bacteroidales;Marinilabiaceae	0.0068558	0	4.36805e-05	0.00883369	0.00133268	0.000759378	0.0357312	0.012038	4.3501e-05	6.19709e-05
0.1.15.3.1.1	Bacteria;Candidate_division_OP3;unclassified;unclassified;unclassified	0.00590464	0.0325872	0.031581	0.000996281	0.00147296	0.00444236	4.06344e-05	0.000260482	0	0
0.1.45.11.31.1	Bacteria;Proteobacteria;Gammaproteobacteria;Legionellales;Coxiellaceae	0.00578473	0.0167355	0.0133881	0.000797024	0.00265133	0.0022022	8.12689e-05	9.30293e-06	0.00603576	0.0142409
0.1.45.11.5.1	Bacteria;Proteobacteria;Gammaproteobacteria;Aeromonadales;Aeromonadaceae	0.00565024	0.0185609	0.0338742	6.64187e-05	0.00374553	0.00444236	0.000297986	0.000297694	0.00138116	0.00210701
0.1.45.4.14.1	Bacteria;Proteobacteria;Alphaproteobacteria;Rhodobacterales;Rhodobacteraceae	0.00508635	0.00566817	0.0103086	0.00690755	0.00129059	0.00224017	0.0128676	0.0063446	0.00117453	0.00321009
0.1.26.2.7.1	Bacteria;Cyanobacteria;Cyanobacteria;SubsectionIII;FamilyI	0.00439445	0.00537996	0.00637736	0.000863443	0.00287578	0.00344252	0.00108359	0.0012559	0.00890682	0.00763482
0.1.32.2.2.29	Bacteria;Firmicutes;Clostridia;Clostridiales;Syntrophomonadaceae	0.00417732	0	2.18403e-05	0.0141472	0.007463	0.00620159	0.00906148	0.005712	0.000337132	0.000347037
0.1.45.11.43.2	Bacteria;Proteobacteria;Gammaproteobacteria;Pseudomonadales;Pseudomonadaceae	0.00386135	0.0180421	0.0246577	0.000664187	0.00030862	0.00082266	0.00036571	0.000902384	0.000348008	0.000768439
0.1.45.4.24.1	Bacteria;Proteobacteria;Alphaproteobacteria;unclassified;unclassified	0.00361343	0.00524546	0.00401861	0.000863443	0.00551308	0.00458158	0.000595972	0.00130241	0.00478511	0.00472218
0.1.45.6.11.1	Bacteria;Proteobacteria;Betaproteobacteria;Neisseriales;Neisseriaceae	0.00322454	0.0114132	0.0141743	0.000332094	0.00241285	0.00272111	0	0	0.00160954	0.0025656
0.1.45.7.4.2	Bacteria;Proteobacteria;Deltaproteobacteria;Bdellovibrionales;Bdellovibrionaceae	0.00291343	0.0170045	0.00982812	0.00119554	0.00158519	0.00279704	2.70896e-05	0.000251179	0.000424134	0.00053295
0.1.58.3.6.1	Bacteria;Verrucomicrobia;Opitutae;Opitutales;Opitutaceae	0.00279838	0.0109713	0.010527	0.00112912	0.00287578	0.00477143	0.000121903	0.00022327	0.00020663	0.000285066
0.1.45.4.16.9	Bacteria;Proteobacteria;Alphaproteobacteria;Rickettsiales;Rickettsiales_Incertae_Sedis	0.0025051	0.00443847	0.00473934	0.000664187	0.00354913	0.00248064	0.000514703	0.000958202	0.00326257	0.00245405
0.1.7.13.1.17	Bacteria;Bacteroidetes;Sphingobacteriia;Sphingobacteriales;Saprospiraceae	0.00245811	0.00549524	0.00607159	0.000199256	0.00483973	0.00570799	6.77241e-05	8.37264e-05	0.000772142	0.000855199
0.1.45.4.16.8	Bacteria;Proteobacteria;Alphaproteobacteria;Rickettsiales;Rickettsiaceae	0.00245324	0.00443847	0.00404045	0.0010627	0.00443291	0.00259454	0.000108359	0.000139544	0.0034257	0.0027639
0.1.45.7.14.18	Bacteria;Proteobacteria;Deltaproteobacteria;Myxococcales;uncultured	0.00245162	0.010049	0.00923843	0.000664187	0.00259522	0.00292361	6.77241e-05	0.00015815	0.000652514	0.000731257
0.1.45.6.14.1	Bacteria;Proteobacteria;Betaproteobacteria;Rhodocyclales;Rhodocyclaceae	0.00243218	0.00851186	0.0102212	0.000265675	0.00251105	0.00294892	4.06344e-05	0.000195362	0.000870019	0.000867593
0.1.45.6.21.1	Bacteria;Proteobacteria;Betaproteobacteria;unclassified;unclassified	0.0024176	0.00463061	0.00434621	0.000797024	0.00293189	0.0023161	0.00165247	0.000400026	0.00369758	0.00177237
0.1.45.7.4.1	Bacteria;Proteobacteria;Deltaproteobacteria;Bdellovibrionales;Bacteriovoracaceae	0.00240787	0.0150639	0.00655208	0.000996281	0.00207617	0.00232876	2.70896e-05	8.37264e-05	0.000250131	0.000260278
0.1.45.4.16.14	Bacteria;Proteobacteria;Alphaproteobacteria;Rickettsiales;SM2D12	0.00240625	0.00247862	0.00150698	0.000265675	0.00395595	0.00248064	0.000230262	0.000400026	0.00429572	0.00433796
0.1.45.11.22.1	Bacteria;Proteobacteria;Gammaproteobacteria;Enterobacteriales;Enterobacteriaceae	0.00235116	0.00899222	0.014218	0.000664187	0.000743494	0.000772035	0.000501158	0.000400026	0.000511136	0.00100393
0.1.7.6.1.2	Bacteria;Bacteroidetes;Flavobacteriia;Flavobacteriales;Cryomorphaceae	0.00230903	0.0070708	0.00843034	0.000398512	0.00310023	0.00318939	0	0	0.0012289	0.000979141
0.1.41.2.1.1	Bacteria;NPL-UPA2;unclassified;unclassified;unclassified	0.00228959	0.00878086	0.0102431	0.000398512	0.00140282	0.00456893	6.77241e-05	0.000139544	0	0
0.1.7.5.1.1	Bacteria;Bacteroidetes;Cytophagia;Cytophagales;Cyclobacteriaceae	0.00227176	0.000211356	0.000240243	0.000199256	0.000294592	0.000202501	0.000176083	0.000148847	0.00990734	0.00495767
0.1.7.13.1.11	Bacteria;Bacteroidetes;Sphingobacteriia;Sphingobacteriales;NS11-12_marine_group	0.00223287	0.00228648	0.00397493	0.000730606	0.00196395	0.00229079	0	6.51205e-05	0.00500261	0.00344558
0.1.45.6.5.6	Bacteria;Proteobacteria;Betaproteobacteria;Burkholderiales;Oxalobacteraceae	0.00219723	0.0100298	0.0124926	0.000398512	0.000519043	0.000405002	5.41793e-05	4.65147e-05	0.00066339	0.00145012
0.1.32.1.2.5	Bacteria;Firmicutes;Bacilli;Bacillales;Family_XII	0.00218264	5.76424e-05	0	0	0	1.26563e-05	1.35448e-05	0	0.00182704	0.0145508
0.1.58.2.19.1	Bacteria;Verrucomicrobia;OPB35_soil_group;unclassified;unclassified	0.00213889	0.00806994	0.0100028	0.000797024	0.00122045	0.00291095	0.00036571	0.000576782	8.70019e-05	0.000198307
0.1.58.8.1.5	Bacteria;Verrucomicrobia;Verrucomicrobiae;Verrucomicrobiales;Verrucomicrobiaceae	0.00212269	0.00142185	0.00364732	0.000132837	0.00294592	0.00360705	6.77241e-05	5.58176e-05	0.0035562	0.00290024
0.1.45.4.15.3	Bacteria;Proteobacteria;Alphaproteobacteria;Rhodospirillales;Acetobacteraceae	0.00209838	0.00138342	0.00240243	0.00956429	0.00187978	0.00237939	0.00281732	0.00280018	0.000522011	0.00111548
0.1.22.1.1.7	Bacteria;Chlamydiae;Chlamydiae;Chlamydiales;cvE6	0.00209352	0.00920357	0.00380021	0.000398512	0.0011924	0.00131626	0	0.000148847	0.0013159	0.00380501
0.1.45.11.34.4	Bacteria;Proteobacteria;Gammaproteobacteria;NKB5;unclassified	0.0020919	0.00562974	0.00397493	0.000265675	0.00374553	0.0022022	1.35448e-05	5.58176e-05	0.00177266	0.00249123
0.1.54.10.1.1	Bacteria;TM6;uncultured_bacterium;unclassified;unclassified	0.00205463	0.00653281	0.00428069	0.000199256	0.00190783	0.00286033	9.48137e-05	0.000102332	0.00163129	0.00246644
0.1.45.6.5.8	Bacteria;Proteobacteria;Betaproteobacteria;Burkholderiales;unclassified	0.00204977	0.000653281	0.000480486	0	0.000967946	0.000632815	2.70896e-05	0.000111635	0.00920045	0.00285066
0.1.32.2.2.25	Bacteria;Firmicutes;Clostridia;Clostridiales;P._palm_C-A_51	0.00204005	1.92141e-05	2.18403e-05	0.012686	0.00116434	0.00208829	0.00339975	0.00511661	0.000108752	8.67593e-05
0.1.13.10.1.1	Bacteria;Candidate_division_OD1;unclassified;unclassified;unclassified	0.00196713	0.00415025	0.00082993	0.00278959	0.00256716	0.00141751	0.000839778	0.00156289	0.00191404	0.00268954
0.1.22.1.1.4	Bacteria;Chlamydiae;Chlamydiae;Chlamydiales;Simkaniaceae	0.00196551	0.00770487	0.0052635	0.000464931	0.00168338	0.00320205	0.000108359	0.000102332	0.000793892	0.00122702
0.1.24.1.1.1	Bacteria;Chloroflexi;Anaerolineae;Anaerolineales;Anaerolineaceae	0.00173056	0.00466904	0.00535086	0.00053135	0.000996002	0.00120235	0.0032643	0.000465147	0.000402384	0.000966746
0.1.51.1.14.6	Bacteria;Spirochaetae;Spirochaetes;Spirochaetales;Spirochaetaceae	0.00173056	0.00215198	0.000960971	0.00245749	0.000967946	0.00151876	0.00155765	0.00526546	3.26257e-05	2.47884e-05
0.1.7.13.1.21	Bacteria;Bacteroidetes;Sphingobacteriia;Sphingobacteriales;env.OPS_17	0.00171273	0.00660966	0.00659576	0.00504782	0.00150102	0.00154407	4.06344e-05	5.58176e-05	0.000652514	0.000458585
0.1.14.9.1.1	Bacteria;Candidate_division_OP11;unclassified;unclassified;unclassified	0.00169653	0.00428475	0.000982812	0.000199256	0.000771551	0.00145548	1.35448e-05	8.37264e-05	0.000804768	0.00646976
0.1.44.14.3.1	Bacteria;Planctomycetes;vadinHA49;unclassified;unclassified	0.00162199	0.008973	0.00947867	0.000132837	0.000350705	0.000645472	0	9.30293e-06	7.61267e-05	0.000173519
0.1.50.3.1.1	Bacteria;SM2F11;uncultured_bacterium;unclassified;unclassified	0.00161875	0.00766644	0.00141962	0.000132837	0.00136074	0.000987192	4.06344e-05	0.000102332	0.00178354	0.00223095
0.1.45.7.9.3	Bacteria;Proteobacteria;Deltaproteobacteria;Desulfovibrionales;Desulfonatronaceae	0.00157662	0	0	0.00398512	0.000252508	0.000202501	0.00348102	0.0057027	9.78772e-05	0
0.1.45.6.10.1	Bacteria;Proteobacteria;Betaproteobacteria;Methylophilales;Methylophilaceae	0.00155394	0.00701316	0.00646472	0	0.00148699	0.00145548	0	0	0.000478511	0.000409008
0.1.42.1.1.7	Bacteria;Nitrospirae;Nitrospira;Nitrospirales;Nitrospiraceae	0.00154584	0.00372754	0.00355996	0.00312168	0.000561128	0.000847972	0.00177437	0.00265134	0.00020663	9.91535e-05
0.1.45.6.12.2	Bacteria;Proteobacteria;Betaproteobacteria;Nitrosomonadales;Nitrosomonadaceae	0.00151019	0.00507253	0.00563479	0.000265675	0.00234271	0.00165798	8.12689e-05	7.44235e-05	0.000543762	0.000545344
0.1.45.11.43.1	Bacteria;Proteobacteria;Gammaproteobacteria;Pseudomonadales;Moraxellaceae	0.00149722	0.0059756	0.00816826	0	0.000589184	0.00068344	0	9.30293e-06	0.000587263	0.00109069
0.1.45.4.5.1	Bacteria;Proteobacteria;Alphaproteobacteria;Caulobacterales;Caulobacteraceae	0.00145996	0.00359304	0.00563479	0.000664187	0.00152907	0.00165798	0.000663696	0.000213967	0.000522011	0.0010659
0.1.45.4.21.16	Bacteria;Proteobacteria;Alphaproteobacteria;Sphingomonadales;SWB04	0.00145347	0.000422711	0.000502326	0.000199256	0.00359122	0.00274642	0.000623061	0.00131171	0.00100052	0.00120224
0.1.7.13.1.23	Bacteria;Bacteroidetes;Sphingobacteriia;Sphingobacteriales;unclassified	0.00142917	0.00370833	0.00329788	0.0130181	0.00115031	0.00135422	0.000189627	0.000586085	0.000467635	0.000409008
0.1.32.3.1.1	Bacteria;Firmicutes;Erysipelotrichia;Erysipelotrichales;Erysipelotrichaceae	0.00142755	0.00023057	0.000196562	0.00053135	0.00150102	0.00106313	0.00292568	0.0038142	0.000174004	0.00023549
0.1.45.4.15.14	Bacteria;Proteobacteria;Alphaproteobacteria;Rhodospirillales;Rhodospirillaceae	0.00141459	0.0032664	0.00414965	0.0021254	0.00220243	0.00224017	0.000230262	0.000455844	0.000500261	0.000433796
0.1.14.15.1.1	Bacteria;Candidate_division_OP11;uncultured_bacterium;unclassified;unclassified	0.00138704	0.00361226	0.00080809	0	0.000420846	0.000772035	1.35448e-05	5.58176e-05	0.000946146	0.00552781
0.1.54.4.1.1	Bacteria;TM6;unclassified;unclassified;unclassified	0.00138704	0.00374676	0.00340708	0.00053135	0.00151505	0.00207563	9.48137e-05	0.000130241	0.00106577	0.00131378
0.1.45.7.21.1	Bacteria;Proteobacteria;Deltaproteobacteria;unclassified;unclassified	0.00136597	0.00622538	0.00432437	0.000597768	0.000799607	0.00136688	8.12689e-05	0.000269785	0.000543762	0.000768439
0.1.32.2.2.28	Bacteria;Firmicutes;Clostridia;Clostridiales;Ruminococcaceae	0.00135301	0.00105678	0.000655208	0.00557917	0.00108017	0.00217688	0.00121903	0.002549	0.000239255	0.00038422
0.1.32.2.2.34	Bacteria;Firmicutes;Clostridia;Clostridiales;unclassified	0.00135301	0.000441925	0.000305764	0.00870085	0.000294592	0.000607503	0.00219426	0.00388863	8.70019e-05	0.000123942
0.1.44.14.7.1	Bacteria;Planctomycetes;vadinHA49;uncultured_Planctomycetales_bacterium;unclassified	0.00133519	0.0061101	0.00565663	0.000664187	0.000645297	0.00234142	5.41793e-05	0	2.17505e-05	0
0.1.7.4.1.18	Bacteria;Bacteroidetes;Bacteroidia;Bacteroidales;Porphyromonadaceae	0.00122986	0.00305505	0.0033634	0.000664187	0.00180964	0.00174657	5.41793e-05	0.00022327	0.000761267	0.000879987
0.1.31.1.1.6	Bacteria;Fibrobacteres;Fibrobacteria;Fibrobacterales;Fibrobacteraceae	0.00116343	0.00607167	0.00657392	0.00119554	0.000420846	0.000556877	0	9.30293e-06	3.26257e-05	6.19709e-05
0.1.44.6.7.1	Bacteria;Planctomycetes;OM190;uncultured_bacterium;unclassified	0.00113588	0.00453454	0.00445541	6.64187e-05	0.00113628	0.00205032	0	0	0.000119628	7.43651e-05
0.1.45.7.14.14	Bacteria;Proteobacteria;Deltaproteobacteria;Myxococcales;Sandaracinaceae	0.00112292	0.00509175	0.00631184	0.000132837	0.000617241	0.0010125	1.35448e-05	3.72117e-05	6.52514e-05	2.47884e-05
0.1.1.1.20.14	Bacteria;Acidobacteria;Acidobacteria;Subgroup_6;unclassified	0.00109537	0.00395811	0.00580951	0.000398512	0.000967946	0.000696097	6.77241e-05	7.44235e-05	0.000369758	0.000334643
0.1.15.10.1.1	Bacteria;Candidate_division_OP3;uncultured_bacterium;unclassified;unclassified	0.00108889	0.0055721	0.00589687	0.00053135	0.000266536	0.000835316	6.77241e-05	0.000130241	0	0
0.1.7.13.1.12	Bacteria;Bacteroidetes;Sphingobacteriia;Sphingobacteriales;PHOS-HE51	0.00107431	0.00564896	0.00589687	6.64187e-05	0.000406818	0.000506252	0	0	0.000141378	0.000198307
0.1.28.1.1.2	Bacteria;Deinococcus-Thermus;Deinococci;Deinococcales;Trueperaceae	0.00106945	0.00055721	0.000764409	0.00119554	0.000112226	7.59378e-05	0.00521475	0.0016001	1.08752e-05	7.43651e-05
0.1.45.4.13.19	Bacteria;Proteobacteria;Alphaproteobacteria;Rhizobiales;Hyphomicrobiaceae	0.00105972	0.00253627	0.00373468	0.000265675	0.000967946	0.000873285	0.000203172	3.72117e-05	0.000641639	0.00162364
0.1.45.20.2.1	Bacteria;Proteobacteria;TA18;unclassified;unclassified	0.00101111	0.000979921	0.00115753	0.000132837	0.000953917	0.000847972	2.70896e-05	0.000204664	0.00133765	0.00292503
0.1.45.7.13.5	Bacteria;Proteobacteria;Deltaproteobacteria;GR-WP33-30;unclassified	0.000986807	0.00416947	0.003691	0.000664187	0.00085572	0.000961879	4.06344e-05	4.65147e-05	0.000315382	0.000483373
0.1.26.4.1.1	Bacteria;Cyanobacteria;Melainabacteria;Caenarcaniphilales;unclassified	0.000960881	0.000441925	0.000393125	0.000132837	0.00354913	0.00349314	0	2.79088e-05	0.000119628	8.67593e-05
0.1.32.2.9.1	Bacteria;Firmicutes;Clostridia;unclassified;unclassified	0.000933335	0	0	0.00564559	0.000238479	0.000177188	0.00123258	0.00341418	1.08752e-05	1.23942e-05
0.1.45.11.54.8	Bacteria;Proteobacteria;Gammaproteobacteria;Xanthomonadales;uncultured	0.000923612	0.00303583	0.00417149	0.000265675	0.0011924	0.000784691	1.35448e-05	2.79088e-05	0.000369758	0.000396614
0.1.45.4.6.8	Bacteria;Proteobacteria;Alphaproteobacteria;DB1-14;uncultured_bacterium	0.000907409	0.00174849	0.000677048	0.000132837	0.00131865	0.00121501	6.77241e-05	0.000204664	0.00132678	0.00120224
0.1.45.4.16.19	Bacteria;Proteobacteria;Alphaproteobacteria;Rickettsiales;unclassified	0.000902548	0.00297819	0.00187826	0.000265675	0.00131865	0.000898598	4.06344e-05	6.51205e-05	0.000815643	0.000768439
0.1.45.6.5.1	Bacteria;Proteobacteria;Betaproteobacteria;Burkholderiales;Alcaligenaceae	0.000886344	0.000864636	0.000786249	0.000464931	0.000112226	0.000164532	0.00270896	0.0018885	0.000195754	0.000210701
0.1.22.1.1.8	Bacteria;Chlamydiae;Chlamydiae;Chlamydiales;unclassified	0.000873381	0.00265155	0.00238059	0.000199256	0.000490987	0.000670784	2.70896e-05	6.51205e-05	0.000837393	0.00142533
0.1.7.13.1.18	Bacteria;Bacteroidetes;Sphingobacteriia;Sphingobacteriales;Sphingobacteriaceae	0.000865279	0.0024402	0.00373468	6.64187e-05	0.000519043	0.000367033	0	9.30293e-06	0.00134853	0.000545344
0.1.45.4.5.2	Bacteria;Proteobacteria;Alphaproteobacteria;Caulobacterales;Hyphomonadaceae	0.000858797	0.00117206	0.00181274	0	0.00137476	0.00137954	2.70896e-05	0.000120938	0.000739516	0.00118984
0.1.7.6.1.5	Bacteria;Bacteroidetes;Flavobacteriia;Flavobacteriales;NS9_marine_group	0.000823149	0.000922279	0.000982812	6.64187e-05	0.00140282	0.00160735	4.06344e-05	4.65147e-05	0.000761267	0.00135097
0.1.26.2.6.2	Bacteria;Cyanobacteria;Cyanobacteria;SubsectionII;FamilyII	0.000821529	0.00468825	0.00539454	0	2.80564e-05	0	0	0	7.61267e-05	8.67593e-05
0.1.45.4.16.4	Bacteria;Proteobacteria;Alphaproteobacteria;Rickettsiales;Holosporaceae	0.000815047	0.00232491	0.0017909	0.00053135	0.000827664	0.000367033	6.77241e-05	0.000241876	0.00102227	0.000979141
0.1.30.1.5.6	Bacteria;Elusimicrobia;Elusimicrobia;Lineage_IIb;uncultured_bacterium	0.000808566	0.00509175	0.00266451	0.000199256	0.000476959	0.000620159	5.41793e-05	5.58176e-05	9.78772e-05	8.67593e-05
0.1.45.11.34.7	Bacteria;Proteobacteria;Gammaproteobacteria;NKB5;uncultured_bacterium	0.000795603	0.00222884	0.00231507	0	0.000490987	0.000518909	1.35448e-05	0	0.000793892	0.00147491
0.1.7.5.1.6	Bacteria;Bacteroidetes;Cytophagia;Cytophagales;unclassified	0.000789121	0.0020367	0.00240243	0.00053135	0.00115031	0.00156938	9.48137e-05	0.00015815	0.000163129	0.000223095
0.1.45.4.13.2	Bacteria;Proteobacteria;Alphaproteobacteria;Rhizobiales;A0839	0.000785881	0.000941493	0.0014633	6.64187e-05	0.00169741	0.00153141	0	2.79088e-05	0.00091352	0.000483373
0.1.45.7.14.6	Bacteria;Proteobacteria;Deltaproteobacteria;Myxococcales;Haliangiaceae	0.00078426	0.00349697	0.00384389	6.64187e-05	0.00046293	0.000620159	5.41793e-05	0.000111635	0.000130503	0.000185913
0.1.51.1.14.4	Bacteria;Spirochaetae;Spirochaetes;Spirochaetales;Leptospiraceae	0.000772918	0.000345855	0.000283923	0.00278959	0.00220243	0.000594846	0.000474068	0.00149777	3.26257e-05	1.23942e-05
0.1.15.15.1.1	Bacteria;Candidate_division_OP3;uncultured_planctomycete;unclassified;unclassified	0.000756714	0.00391968	0.00373468	0.000398512	0.000252508	0.000734066	4.06344e-05	6.51205e-05	0	0
0.1.30.1.6.3	Bacteria;Elusimicrobia;Elusimicrobia;Lineage_IIc;uncultured_bacterium	0.000712964	0.00545682	0.00273003	6.64187e-05	0.000182367	0.000177188	0	1.86059e-05	0	1.23942e-05
0.1.30.1.10.3	Bacteria;Elusimicrobia;Elusimicrobia;MVP-88;uncultured_bacterium	0.000709723	0.00507253	0.00338524	0.000132837	0.000126254	6.32815e-05	0	2.79088e-05	0	0
0.1.23.1.1.2	Bacteria;Chlorobi;Chlorobia;Chlorobiales;OPB56	0.000704862	0.00115285	0.00251163	0.000929862	0.00108017	0.00122766	6.77241e-05	0.000148847	0.000195754	0.000409008
0.1.7.13.1.10	Bacteria;Bacteroidetes;Sphingobacteriia;Sphingobacteriales;LiUU-11-161	0.000690279	5.76424e-05	2.18403e-05	0.000664187	0.00136074	0.00113907	0	9.30293e-06	0.00045676	0.00225574
0.1.26.2.5.1	Bacteria;Cyanobacteria;Cyanobacteria;SubsectionI;FamilyI	0.000685418	0.000614853	0.00120121	0	0.000112226	0.000164532	2.70896e-05	2.79088e-05	0.00133765	0.00231771
0.1.55.1.11.6	Bacteria;Tenericutes;Mollicutes;RF9;unclassified	0.000683797	5.76424e-05	4.36805e-05	6.64187e-05	0.000280564	0.000253126	0.000501158	0.00314439	1.08752e-05	0
0.1.7.13.1.9	Bacteria;Bacteroidetes;Sphingobacteriia;Sphingobacteriales;KD3-93	0.000677316	0.00378519	0.00349444	0.000398512	0.000224451	0.000215157	0	0	0.000152253	9.91535e-05
0.1.45.4.6.5	Bacteria;Proteobacteria;Alphaproteobacteria;DB1-14;unclassified	0.000667594	0.00103756	0.000480486	0	0.000827664	0.000632815	9.48137e-05	0.000241876	0.000989647	0.0012766
0.1.45.4.13.36	Bacteria;Proteobacteria;Alphaproteobacteria;Rhizobiales;unclassified	0.000662732	0.00126813	0.0020093	0.000199256	0.00046293	0.000670784	8.12689e-05	9.30293e-06	0.000413259	0.00145012
0.1.2.3.1.1	Bacteria;Actinobacteria;Coriobacteriia;Coriobacteriales;Coriobacteriaceae	0.000646529	1.92141e-05	2.18403e-05	0.000664187	0.00030862	0.000316408	0.00223489	0.00132102	0.00020663	0.000173519
0.1.45.4.21.8	Bacteria;Proteobacteria;Alphaproteobacteria;Sphingomonadales;Erythrobacteraceae	0.000635186	0.000537996	0.0013541	0.000464931	0.0010942	0.000873285	0.000419889	0.000148847	0.000217505	0.00100393
0.1.41.4.1.1	Bacteria;NPL-UPA2;uncultured_Omnitrophica_bacterium;unclassified;unclassified	0.000625464	0.00305505	0.003145	6.64187e-05	0.000140282	0.000860629	1.35448e-05	2.79088e-05	0	0
0.1.45.11.7.1	Bacteria;Proteobacteria;Gammaproteobacteria;Alteromonadales;Alteromonadaceae	0.000614121	0.00272841	0.0033634	0	0.000350705	0.000518909	1.35448e-05	0	2.17505e-05	0.000173519
0.1.45.20.10.1	Bacteria;Proteobacteria;TA18;uncultured_bacterium;unclassified	0.000606019	0.000749352	0.000414965	0	0.000490987	0.000417658	0	9.30293e-05	0.000630764	0.00223095
0.1.15.6.1.1	Bacteria;Candidate_division_OP3;uncultured_Firmicutes_bacterium;unclassified;unclassified	0.000602779	0.0035354	0.00318868	0.000265675	8.41692e-05	0.000265782	4.06344e-05	7.44235e-05	0	0
0.1.23.2.1.11	Bacteria;Chlorobi;Ignavibacteria;Ignavibacteriales;unclassified	0.000602779	0	2.18403e-05	0.00146121	0.00145893	0.00129094	0.000243807	0.000818658	0.000217505	0.000210701
0.1.45.4.13.25	Bacteria;Proteobacteria;Alphaproteobacteria;Rhizobiales;Methylobacteriaceae	0.000602779	0.00121049	0.00104833	0.000132837	0.000883776	0.000531565	6.77241e-05	3.72117e-05	0.00045676	0.0012766
0.1.26.4.1.3	Bacteria;Cyanobacteria;Melainabacteria;Caenarcaniphilales;uncultured_bacterium	0.000599538	0.00132578	0.000786249	0	0.0015431	0.00146813	0	1.86059e-05	0.00020663	0.000223095
0.1.59.10.1.1	Bacteria;WCHB1-60;uncultured_microorganism;unclassified;unclassified	0.000594677	0	0	6.64187e-05	0.000757523	0.00121501	0.000460524	0.000530267	0.000467635	0.00101632
0.1.44.7.12.4	Bacteria;Planctomycetes;Phycisphaerae;Phycisphaerales;Phycisphaeraceae	0.000589816	0.00128735	0.00152882	0.000132837	0.000869748	0.00124032	4.06344e-05	0.0003163	0.000108752	0.000223095
0.1.45.11.54.6	Bacteria;Proteobacteria;Gammaproteobacteria;Xanthomonadales;Xanthomonadales_Incertae_Sedis	0.000589816	0.00303583	0.00316684	6.64187e-05	0.000168338	0.000468283	0	1.86059e-05	5.43762e-05	4.95767e-05
0.1.7.13.1.3	Bacteria;Bacteroidetes;Sphingobacteriia;Sphingobacteriales;CMW-169	0.000580093	0	0	0	0.000631269	0.000556877	0.000460524	0.00197222	0.000119628	0.00014873
0.1.45.7.14.17	Bacteria;Proteobacteria;Deltaproteobacteria;Myxococcales;unclassified	0.000571992	0.00240177	0.00235875	0.000132837	0.000575156	0.000784691	1.35448e-05	2.79088e-05	6.52514e-05	6.19709e-05
0.1.26.4.1.4	Bacteria;Cyanobacteria;Melainabacteria;Caenarcaniphilales;uncultured_cyanobacterium	0.00056551	0.000883851	0.000502326	0.000132837	0.00140282	0.0017086	1.35448e-05	9.30293e-06	0.000348008	0.000111548
0.1.45.11.18.1	Bacteria;Proteobacteria;Gammaproteobacteria;Chromatiales;Chromatiaceae	0.000534723	0.0021712	0.00255531	0.000730606	0.00039279	0.00068344	0	2.79088e-05	1.08752e-05	3.71826e-05
0.1.58.2.28.1	Bacteria;Verrucomicrobia;OPB35_soil_group;uncultured_bacterium;unclassified	0.000534723	0.00263234	0.0032542	0	0.000182367	0.000379689	0	0	0	1.23942e-05
0.1.45.4.16.1	Bacteria;Proteobacteria;Alphaproteobacteria;Rickettsiales;AKIW1012	0.000505556	0.000749352	0.000567847	0	0.000869748	0.000417658	0	3.72117e-05	0.00103315	0.000656892
0.1.4.7.1.1	Bacteria;Armatimonadetes;unclassified;unclassified;unclassified	0.000503936	0.000211356	0.000458645	0.000132837	0.000210423	0.000607503	0.00116485	0.000567479	0.000304507	0.000483373
0.1.26.3.2.1	Bacteria;Cyanobacteria;ML635J-21;unclassified;unclassified	0.000499075	0.00155635	0.00126674	0.000199256	0.00085572	0.000645472	0	0	0.000391509	0.000223095
0.1.1.1.18.5	Bacteria;Acidobacteria;Acidobacteria;Subgroup_4;Unknown_Family	0.000494214	0.00134499	0.00174722	0.000199256	0.000168338	0.000278439	0.000419889	7.44235e-05	0.000304507	0.000632103
0.1.30.1.7.6	Bacteria;Elusimicrobia;Elusimicrobia;Lineage_IV;uncultured_bacterium	0.000489353	0.00328562	0.00220587	6.64187e-05	0.000182367	0.000202501	0	0	0	0
0.1.45.7.13.1	Bacteria;Proteobacteria;Deltaproteobacteria;GR-WP33-30;bacterium_enrichment_culture_clone_B126	0.000489353	0.0024402	0.00128858	0	0.000448902	0.000734066	0	9.30293e-06	0.000130503	0.000161124
0.1.44.2.6.1	Bacteria;Planctomycetes;BD7-11;uncultured_bacterium_PHOS-HE93;unclassified	0.000484491	0.00226727	0.00231507	0	0.000434874	0.000442971	0	0	7.61267e-05	2.47884e-05
0.1.26.4.4.4	Bacteria;Cyanobacteria;Melainabacteria;Vampirovibrionales;uncultured_bacterium	0.000482871	0.000365069	0.000371284	0	0.000252508	0.000518909	2.70896e-05	5.58176e-05	0.000793892	0.00151209
0.1.45.4.21.22	Bacteria;Proteobacteria;Alphaproteobacteria;Sphingomonadales;unclassified	0.000482871	0.000653281	0.000742569	0.000265675	0.000224451	0.00024047	0.000514703	0.000548873	0.000337132	0.000780834
0.1.7.13.1.19	Bacteria;Bacteroidetes;Sphingobacteriia;Sphingobacteriales;WCHB1-69	0.000474769	1.92141e-05	4.36805e-05	0.00245749	0.00015431	0.000189845	0.000474068	0.00149777	0.000163129	0.000198307
0.1.32.4.1.2	Bacteria;Firmicutes;Negativicutes;Selenomonadales;Veillonellaceae	0.000453704	0.00194063	0.0016817	6.64187e-05	0.000476959	0.000303751	4.06344e-05	5.58176e-05	0.000152253	0.000247884
0.1.33.1.1.3	Bacteria;Fusobacteria;Fusobacteriia;Fusobacteriales;Fusobacteriaceae	0.000448843	0	6.55208e-05	0	0.00161324	0.00105047	0	0	0.000304507	0.000594921
0.1.36.1.3.1	Bacteria;Gemmatimonadetes;Gemmatimonadetes;Gemmatimonadales;Gemmatimonadaceae	0.000447223	0.00109521	0.00148514	6.64187e-05	0.000519043	0.000455627	8.12689e-05	8.37264e-05	0.000293631	0.000433796
0.1.45.11.7.10	Bacteria;Proteobacteria;Gammaproteobacteria;Alteromonadales;Shewanellaceae	0.000445602	0.00209434	0.00349444	0	2.80564e-05	1.26563e-05	0	0	1.08752e-05	2.47884e-05
0.1.45.6.16.5	Bacteria;Proteobacteria;Betaproteobacteria;TRA3-20;unclassified	0.000443982	0.00146027	0.00159434	0.000132837	0.00070141	0.000556877	1.35448e-05	1.86059e-05	0.000152253	0.00014873
0.1.45.4.15.15	Bacteria;Proteobacteria;Alphaproteobacteria;Rhodospirillales;Rhodospirillales_Incertae_Sedis	0.00043588	0.00122971	0.00165986	6.64187e-05	0.000350705	0.000354377	0.000135448	9.30293e-05	0.000195754	0.000458585
0.1.58.9.1.1	Bacteria;Verrucomicrobia;unclassified;unclassified;unclassified	0.00043588	0.00130656	0.00155066	0	0.000448902	0.000506252	0	9.30293e-05	0.00020663	0.000359431
0.1.5.11.1.1	Bacteria;BD1-5;unclassified;unclassified;unclassified	0.00043426	0.00188299	0.000677048	0	0.000196395	0.00024047	0	5.58176e-05	0.000500261	0.000669286
0.1.44.7.17.8	Bacteria;Planctomycetes;Phycisphaerae;WD2101_soil_group;unclassified	0.000413195	7.68566e-05	0.000152882	0.00292242	0.000182367	0.00034172	0.000839778	0.000781446	8.70019e-05	7.43651e-05
0.1.45.11.36.21	Bacteria;Proteobacteria;Gammaproteobacteria;Oceanospirillales;Oceanospirillaceae	0.000411575	0.00155635	0.00152882	0	0.000617241	0.000594846	1.35448e-05	0	0.000108752	1.23942e-05
0.1.45.7.14.11	Bacteria;Proteobacteria;Deltaproteobacteria;Myxococcales;Nannocystaceae	0.000406714	0.00194063	0.0016817	0.000199256	0.000280564	0.000544221	1.35448e-05	2.79088e-05	2.17505e-05	1.23942e-05
0.1.24.23.3.1	Bacteria;Chloroflexi;uncultured;unclassified;unclassified	0.00039051	5.76424e-05	0.000131042	0.00690755	4.20846e-05	0.00010125	0.00036571	0.000567479	0.00022838	9.91535e-05
0.1.32.2.2.12	Bacteria;Firmicutes;Clostridia;Clostridiales;Family_XII	0.000371065	0.000480354	0.000698888	0	0.000743494	0.000911254	2.70896e-05	0.000213967	0.000108752	0.00014873
0.1.30.1.7.2	Bacteria;Elusimicrobia;Elusimicrobia;Lineage_IV;unclassified	0.00034676	0.00211356	0.00161618	6.64187e-05	0.000182367	0.000177188	1.35448e-05	9.30293e-06	0	0
0.1.45.4.13.21	Bacteria;Proteobacteria;Alphaproteobacteria;Rhizobiales;JG35-K1-AG5	0.000333797	0.00155635	0.00207482	0	8.41692e-05	5.06252e-05	0	0	3.26257e-05	0.000210701
0.1.45.4.13.23	Bacteria;Proteobacteria;Alphaproteobacteria;Rhizobiales;MNG7	0.000330556	0.00128735	0.00176906	0	0.000140282	0.000189845	0	0	0.000119628	0.000247884
0.1.26.7.1.1	Bacteria;Cyanobacteria;unclassified;unclassified;unclassified	0.000324075	0.000480354	0.00100465	6.64187e-05	0.00030862	0.000506252	2.70896e-05	4.65147e-05	0.00045676	0.000210701
0.1.45.4.13.26	Bacteria;Proteobacteria;Alphaproteobacteria;Rhizobiales;Methylocystaceae	0.000322454	0.0016332	0.00170354	0.000265675	5.61128e-05	5.06252e-05	0	0	0.000152253	0.000123942
0.1.45.4.15.16	Bacteria;Proteobacteria;Alphaproteobacteria;Rhodospirillales;unclassified	0.000319213	0.000922279	0.000786249	0	0.000589184	0.000417658	2.70896e-05	0.000213967	8.70019e-05	6.19709e-05
0.1.14.2.1.1	Bacteria;Candidate_division_OP11;Microgenomates_bacterium_SCGC_AAA011-B20;unclassified;unclassified	0.000315973	0.000268998	2.18403e-05	0	0.000196395	0.000291095	6.77241e-05	2.79088e-05	0.000315382	0.00131378
0.1.58.5.1.2	Bacteria;Verrucomicrobia;Spartobacteria;Chthoniobacterales;Chthoniobacteraceae	0.000312732	0.000576424	0.00109201	0.000132837	0.000336677	0.00058219	2.70896e-05	9.30293e-06	0.000195754	0.000247884
0.1.22.1.1.3	Bacteria;Chlamydiae;Chlamydiae;Chlamydiales;Parachlamydiaceae	0.000309491	0.000499568	0.00085177	0.000132837	0.000140282	0.000164532	2.70896e-05	3.72117e-05	0.000358883	0.000768439
0.1.32.2.2.3	Bacteria;Firmicutes;Clostridia;Clostridiales;Clostridiaceae_1	0.000309491	0.00188299	0.0014633	0	0.000140282	6.32815e-05	0	3.72117e-05	2.17505e-05	6.19709e-05
0.1.1.1.18.1	Bacteria;Acidobacteria;Acidobacteria;Subgroup_4;11-24	0.000307871	0.00165242	0.0015725	0	0.000140282	0.000139219	0	0	4.3501e-05	8.67593e-05
0.1.26.2.14.1	Bacteria;Cyanobacteria;Cyanobacteria;unclassified;unclassified	0.00030625	0.000691709	0.000720729	0	0.000196395	0.000113907	5.41793e-05	2.79088e-05	0.000424134	0.000632103
0.1.44.6.2.1	Bacteria;Planctomycetes;OM190;unclassified;unclassified	0.000299769	0.00146027	0.00124489	0	9.81974e-05	0.000518909	0	0	2.17505e-05	2.47884e-05
0.1.19.20.1.1	Bacteria;Candidate_division_TM7;unclassified;unclassified;unclassified	0.000296528	0.000384283	0.000371284	0	1.40282e-05	2.53126e-05	0	0	0.000217505	0.00152448
0.1.58.3.10.1	Bacteria;Verrucomicrobia;Opitutae;unclassified;unclassified	0.000290047	0.000806994	0.00104833	6.64187e-05	0.000322649	0.000632815	0	9.30293e-06	4.3501e-05	0.000123942
0.1.45.4.16.20	Bacteria;Proteobacteria;Alphaproteobacteria;Rickettsiales;uncultured	0.000288426	0.000653281	0.00080809	6.64187e-05	0.0005471	0.000215157	0	9.30293e-06	0.00020663	0.000371826
0.1.26.4.3.6	Bacteria;Cyanobacteria;Melainabacteria;Obscuribacterales;uncultured_bacterium	0.000286806	0.00107599	0.000939131	6.64187e-05	0.000364733	0.00034172	8.12689e-05	6.51205e-05	4.3501e-05	8.67593e-05
0.1.7.5.1.3	Bacteria;Bacteroidetes;Cytophagia;Cytophagales;Flammeovirgaceae	0.000281945	0.0016332	0.00133226	0.000332094	4.20846e-05	0.000151876	1.35448e-05	6.51205e-05	0	0
0.1.44.13.1.1	Bacteria;Planctomycetes;unclassified;unclassified;unclassified	0.000278704	0.00128735	0.00133226	0	0.000210423	0.000164532	0	0	7.61267e-05	0.000111548
0.1.5.21.1.1	Bacteria;BD1-5;uncultured_bacterium_GKS2-30;unclassified;unclassified	0.000275463	0.000691709	0.000262083	6.64187e-05	0.000224451	0.000189845	0	0	0.000424134	0.000632103
0.1.45.6.6.2	Bacteria;Proteobacteria;Betaproteobacteria;DR-16;uncultured_bacterium	0.000275463	0.00155635	0.00176906	0	7.0141e-05	2.53126e-05	0	0	0	1.23942e-05
0.1.32.6.1.1	Bacteria;Firmicutes;unclassified;unclassified;unclassified	0.000273843	5.76424e-05	0	0.00232465	8.41692e-05	0.00010125	0.000297986	0.000846567	0	4.95767e-05
0.1.45.4.13.34	Bacteria;Proteobacteria;Alphaproteobacteria;Rhizobiales;Xanthobacteraceae	0.000267361	0.00119128	0.000917291	0.000199256	0.000126254	0.000139219	5.41793e-05	0	0.000119628	0.000285066
0.1.54.12.1.1	Bacteria;TM6;uncultured_bacterium_SBRH58;unclassified;unclassified	0.000267361	0.000883851	0.00085177	0.000597768	0.000280564	0.000531565	0	0	6.52514e-05	3.71826e-05
0.1.55.1.9.1	Bacteria;Tenericutes;Mollicutes;Mycoplasmatales;Mycoplasmataceae	0.000265741	0.000153713	0.000611527	0	0.00039279	0.000392345	0	0	0.000271881	0.000545344
0.1.45.7.14.13	Bacteria;Proteobacteria;Deltaproteobacteria;Myxococcales;Polyangiaceae	0.00026088	0.000979921	0.0014633	0.000398512	0.000182367	0.000151876	1.35448e-05	9.30293e-06	3.26257e-05	8.67593e-05
0.1.7.4.1.22	Bacteria;Bacteroidetes;Bacteroidia;Bacteroidales;Rikenellaceae	0.000254399	0.000749352	0.000633368	0	0.000280564	0.000265782	0	1.86059e-05	0.000152253	0.000396614
0.1.45.11.33.13	Bacteria;Proteobacteria;Gammaproteobacteria;Methylococcales;unclassified	0.000246297	0.00126813	0.00126674	0.000398512	0.000112226	0.00010125	2.70896e-05	3.72117e-05	0	0
0.1.58.5.1.4	Bacteria;Verrucomicrobia;Spartobacteria;Chthoniobacterales;FukuN18_freshwater_group	0.000244676	0.000172927	0.000393125	6.64187e-05	0.000126254	0.00024047	0.000108359	9.30293e-05	0.000337132	0.000570132
0.1.45.11.34.15	Bacteria;Proteobacteria;Gammaproteobacteria;NKB5;uncultured_soil_bacterium	0.000241436	0.000845422	0.000524166	0	0.000210423	0.000164532	0	0	0.000282756	0.000334643
0.1.45.4.13.30	Bacteria;Proteobacteria;Alphaproteobacteria;Rhizobiales;Rhizobiaceae	0.000239815	0.000883851	0.00131042	0.000199256	4.20846e-05	8.85941e-05	5.41793e-05	1.86059e-05	4.3501e-05	0.00023549
0.1.1.1.17.8	Bacteria;Acidobacteria;Acidobacteria;Subgroup_3;Unknown_Family	0.000236574	0.000710923	0.00087361	0.000199256	0.000196395	0.000291095	6.77241e-05	8.37264e-05	7.61267e-05	9.91535e-05
0.1.30.1.4.3	Bacteria;Elusimicrobia;Elusimicrobia;Lineage_IIa;unclassified	0.000234954	0.00161399	0.00082993	0.000132837	5.61128e-05	0.000139219	0	0	6.52514e-05	0
0.1.45.11.33.2	Bacteria;Proteobacteria;Gammaproteobacteria;Methylococcales;CABC2E06	0.000234954	1.92141e-05	0	0	0.000813635	0.00108844	0	0	0	0
0.1.45.4.13.9	Bacteria;Proteobacteria;Alphaproteobacteria;Rhizobiales;Bradyrhizobiaceae	0.000226852	0.000883851	0.00124489	0.000132837	9.81974e-05	5.06252e-05	5.41793e-05	0	8.70019e-05	0.00014873
0.1.28.1.1.1	Bacteria;Deinococcus-Thermus;Deinococci;Deinococcales;Deinococcaceae	0.00021713	0.000806994	0.00085177	0.000132837	1.40282e-05	3.79689e-05	1.35448e-05	9.30293e-06	6.52514e-05	0.000483373
0.1.44.14.14.1	Bacteria;Planctomycetes;vadinHA49;uncultured_soil_bacterium;unclassified	0.00021713	0.00078778	0.000742569	6.64187e-05	0.000140282	0.000354377	2.70896e-05	9.30293e-05	4.3501e-05	4.95767e-05
0.1.1.1.17.9	Bacteria;Acidobacteria;Acidobacteria;Subgroup_3;unclassified	0.00021551	0.000115285	0.000152882	0.00139479	7.0141e-05	8.85941e-05	0.000487613	0.000446541	2.17505e-05	1.23942e-05
0.1.58.5.1.5	Bacteria;Verrucomicrobia;Spartobacteria;Chthoniobacterales;LD29	0.00021551	0	0	0.000332094	0.000168338	0.000139219	0.000352165	0.000660508	5.43762e-05	3.71826e-05
0.1.49.2.1.1	Bacteria;SHA-109;unclassified;unclassified;unclassified	0.000213889	0.000192141	0.000414965	0	0.000168338	0.000405002	0	0	0.000271881	0.000421402
0.1.2.2.19.1	Bacteria;Actinobacteria;Actinobacteria;unclassified;unclassified	0.000207408	0.00032664	0.000283923	0	0	0	1.35448e-05	0	0.000815643	0.000272672
0.1.45.6.9.1	Bacteria;Proteobacteria;Betaproteobacteria;Hydrogenophilales;Hydrogenophilaceae	0.000205787	0.000153713	0.000240243	0.000332094	0.000238479	0.000202501	0.000230262	0.000251179	0.000108752	0.000198307
0.1.44.7.17.12	Bacteria;Planctomycetes;Phycisphaerae;WD2101_soil_group;uncultured_bacterium	0.000204167	0.00032664	0.000633368	6.64187e-05	0.000266536	0.000189845	4.06344e-05	0.00015815	0.000108752	0.000185913
0.1.41.3.1.1	Bacteria;NPL-UPA2;uncultured_Flavobacteriaceae_bacterium;unclassified;unclassified	0.000202547	0.00128735	0.000917291	0	5.61128e-05	0.000126563	0	1.86059e-05	0	0
0.1.45.11.51.3	Bacteria;Proteobacteria;Gammaproteobacteria;Thiotrichales;EV818SWSAP88	0.000202547	0.000268998	0.000240243	0	8.41692e-05	0.000151876	0	1.86059e-05	0.000271881	0.00068168
0.1.44.7.15.5	Bacteria;Planctomycetes;Phycisphaerae;S15A-MN16;uncultured_soil_bacterium	0.000197685	0	0	0.000199256	0.000182367	0.000303751	0.000528248	0.000400026	0	0
0.1.30.1.6.1	Bacteria;Elusimicrobia;Elusimicrobia;Lineage_IIc;unclassified	0.000196065	0.00153713	0.000720729	0	4.20846e-05	1.26563e-05	0	9.30293e-06	2.17505e-05	1.23942e-05
0.1.7.5.1.4	Bacteria;Bacteroidetes;Cytophagia;Cytophagales;MWH-CFBk5	0.000194445	0.00111442	0.00126674	0	2.80564e-05	2.53126e-05	0	0	0	0
0.1.45.4.15.7	Bacteria;Proteobacteria;Alphaproteobacteria;Rhodospirillales;I-10	0.000194445	0.000653281	0.000524166	6.64187e-05	0.000336677	0.000417658	1.35448e-05	0	2.17505e-05	1.23942e-05
0.1.10.3.1.1	Bacteria;Candidate_division_BRC1;unclassified;unclassified;unclassified	0.000192824	0.000422711	0.00080809	6.64187e-05	0.000168338	0.00024047	0	0	0.000130503	0.000198307
0.1.2.2.14.1	Bacteria;Actinobacteria;Actinobacteria;Propionibacteriales;Nocardioidaceae	0.000191204	0.000941493	0.0013541	6.64187e-05	0	1.26563e-05	1.35448e-05	9.30293e-06	0	3.71826e-05
0.1.45.11.18.2	Bacteria;Proteobacteria;Gammaproteobacteria;Chromatiales;Ectothiorhodospiraceae	0.000191204	0.00151792	0.000655208	0	2.80564e-05	1.26563e-05	2.70896e-05	3.72117e-05	0	0
0.1.32.2.2.9	Bacteria;Firmicutes;Clostridia;Clostridiales;Defluviitaleaceae	0.000187963	0.000461139	0.000480486	0	0.000238479	0.000518909	1.35448e-05	0	6.52514e-05	6.19709e-05
0.1.45.4.13.29	Bacteria;Proteobacteria;Alphaproteobacteria;Rhizobiales;Phyllobacteriaceae	0.000184722	0.000595638	0.00122305	0	8.41692e-05	5.06252e-05	1.35448e-05	1.86059e-05	4.3501e-05	0.000123942
0.1.58.7.1.1	Bacteria;Verrucomicrobia;Verrucomicrobia_Incertae_Sedis;Unknown_Order;Unknown_Family	0.000184722	0.000883851	0.000720729	0	0.000210423	0.000202501	1.35448e-05	0	1.08752e-05	2.47884e-05
0.1.1.1.19.1	Bacteria;Acidobacteria;Acidobacteria;Subgroup_5;unclassified	0.000181482	0.000883851	0.00085177	0	0.000126254	0.000202501	0	0	2.17505e-05	0
0.1.15.11.1.1	Bacteria;Candidate_division_OP3;uncultured_beta_proteobacterium;unclassified;unclassified	0.000181482	0.000614853	0.00117937	0	0.000126254	0.000215157	0	0	0	0
0.1.15.12.1.1	Bacteria;Candidate_division_OP3;uncultured_deep-sea_bacterium;unclassified;unclassified	0.000181482	0.00101835	0.00100465	6.64187e-05	2.80564e-05	0.000113907	0	9.30293e-06	0	0
0.1.45.4.13.31	Bacteria;Proteobacteria;Alphaproteobacteria;Rhizobiales;Rhizobiales_Incertae_Sedis	0.000181482	0.000614853	0.00109201	6.64187e-05	0.000140282	5.06252e-05	1.35448e-05	1.86059e-05	4.3501e-05	9.91535e-05
0.1.45.7.11.8	Bacteria;Proteobacteria;Deltaproteobacteria;Desulfuromonadales;Desulfuromonadaceae	0.000178241	5.76424e-05	0	0	0.000645297	0.000746722	0	9.30293e-06	1.08752e-05	0
0.1.58.2.21.1	Bacteria;Verrucomicrobia;OPB35_soil_group;uncultured_Crater_Lake_bacterium_CL120-133;unclassified	0.000178241	0.000999135	0.00107017	0	7.0141e-05	5.06252e-05	0	0	0	0
0.1.1.1.20.18	Bacteria;Acidobacteria;Acidobacteria;Subgroup_6;uncultured_Acidobacteria_bacterium	0.00017338	0.000268998	0.000524166	0	0.000322649	0.000278439	0	6.51205e-05	0.000130503	6.19709e-05
0.1.32.1.2.2	Bacteria;Firmicutes;Bacilli;Bacillales;Bacillaceae	0.00017338	0.000288212	0.000589687	6.64187e-05	8.41692e-05	0.000227813	1.35448e-05	9.30293e-06	8.70019e-05	0.000371826
0.1.45.6.16.18	Bacteria;Proteobacteria;Betaproteobacteria;TRA3-20;uncultured_beta_proteobacterium	0.00017338	0.000307426	0.000655208	6.64187e-05	0.000350705	0.000354377	0	0	3.26257e-05	4.95767e-05
0.1.45.4.16.5	Bacteria;Proteobacteria;Alphaproteobacteria;Rickettsiales;LR_A2-29	0.000171759	9.60707e-05	0.000109201	0.000265675	0.000533071	0.000392345	4.06344e-05	0.00015815	2.17505e-05	1.23942e-05
0.1.50.1.1.1	Bacteria;SM2F11;unclassified;unclassified;unclassified	0.000170139	0.00121049	0.000109201	0	9.81974e-05	2.53126e-05	0	2.79088e-05	9.78772e-05	0.000198307
0.1.45.11.54.4	Bacteria;Proteobacteria;Gammaproteobacteria;Xanthomonadales;Solimonadaceae	0.000168519	0.000614853	0.000939131	0.000132837	0.000140282	0.000113907	0	9.30293e-06	2.17505e-05	6.19709e-05
0.1.7.4.1.4	Bacteria;Bacteroidetes;Bacteroidia;Bacteroidales;Bacteroidaceae	0.000165278	0.000249784	0.000109201	0	0.000350705	0.000417658	0	0	4.3501e-05	0.000272672
0.1.58.5.1.6	Bacteria;Verrucomicrobia;Spartobacteria;Chthoniobacterales;Xiphinematobacteraceae	0.000165278	0.000192141	0.000349444	0.000132837	0.00015431	0.000151876	0.000257351	0.000176756	4.3501e-05	0.000111548
0.1.26.4.4.1	Bacteria;Cyanobacteria;Melainabacteria;Vampirovibrionales;Vampirovibrio_chlorellavorus	0.000163658	0	0	0	9.81974e-05	0.000126563	0	0	0.000413259	0.000570132
0.1.45.4.12.1	Bacteria;Proteobacteria;Alphaproteobacteria;Parvularculales;Parvularculaceae	0.000163658	7.68566e-05	0.000218403	0	0.000210423	0.000329064	2.70896e-05	0	0.000163129	0.000359431
0.1.45.7.18.3	Bacteria;Proteobacteria;Deltaproteobacteria;Sh765B-TzT-29;unclassified	0.000162037	0.000576424	0.000611527	0	0.000168338	0.000189845	0	9.30293e-06	9.78772e-05	6.19709e-05
0.1.5.19.1.1	Bacteria;BD1-5;uncultured_bacterium;unclassified;unclassified	0.000158797	0.000749352	0.000218403	0	7.0141e-05	6.32815e-05	1.35448e-05	6.51205e-05	0.000119628	0.000247884
0.1.30.1.4.7	Bacteria;Elusimicrobia;Elusimicrobia;Lineage_IIa;uncultured_bacterium	0.000157176	0.00103756	0.000611527	0.000199256	1.40282e-05	8.85941e-05	1.35448e-05	0	3.26257e-05	0
0.1.31.1.1.5	Bacteria;Fibrobacteres;Fibrobacteria;Fibrobacterales;FD035	0.000155556	7.68566e-05	8.7361e-05	0.000199256	0.000196395	0.000139219	0.000176083	0.000409329	1.08752e-05	2.47884e-05
0.1.42.1.1.1	Bacteria;Nitrospirae;Nitrospira;Nitrospirales;0319-6A21	0.000155556	0.000730137	0.000939131	0	5.61128e-05	0.000113907	1.35448e-05	0	1.08752e-05	0
0.1.23.2.1.2	Bacteria;Chlorobi;Ignavibacteria;Ignavibacteriales;BSV26	0.000150695	0.000806994	0.000502326	0	7.0141e-05	0.000164532	1.35448e-05	9.30293e-06	8.70019e-05	0
0.1.26.4.4.3	Bacteria;Cyanobacteria;Melainabacteria;Vampirovibrionales;unclassified	0.000149074	7.68566e-05	0.000131042	0	0.000336677	0.000227813	0	5.58176e-05	0.000195754	0.000198307
0.1.32.2.2.23	Bacteria;Firmicutes;Clostridia;Clostridiales;Lachnospiraceae	0.000147454	0.000480354	0.000524166	6.64187e-05	0.000140282	0.000265782	1.35448e-05	1.86059e-05	3.26257e-05	4.95767e-05
0.1.46.2.1.1	Bacteria;RsaHF231;uncultured_bacterium;unclassified;unclassified	0.000142593	0.000441925	0.000436805	0	1.40282e-05	2.53126e-05	6.77241e-05	0.000130241	4.3501e-05	0.00023549
0.1.58.5.1.7	Bacteria;Verrucomicrobia;Spartobacteria;Chthoniobacterales;unclassified	0.000139352	0.000134499	0.000218403	0	0.000252508	0.000316408	0	2.79088e-05	0.000108752	0.000161124
0.1.44.7.14.3	Bacteria;Planctomycetes;Phycisphaerae;S-70;uncultured_bacterium	0.000137732	0.000461139	0.000567847	0	0.000182367	0.000189845	0	0	3.26257e-05	4.95767e-05
0.1.6.7.1.1	Bacteria;BHI80-139;uncultured_Geobacillus_sp.;unclassified;unclassified	0.00013125	0.00023057	0.000458645	0	0.000126254	0.000139219	0	0	0.000130503	0.000198307
0.1.5.31.1.1	Bacteria;BD1-5;uncultured_sludge_bacterium;unclassified;unclassified	0.00012963	0.000384283	4.36805e-05	0	9.81974e-05	6.32815e-05	0	4.65147e-05	0.000174004	0.000309855
0.1.45.7.14.12	Bacteria;Proteobacteria;Deltaproteobacteria;Myxococcales;Phaselicystidaceae	0.00012963	0.000268998	0.000436805	0.00126196	9.81974e-05	0.000151876	5.41793e-05	1.86059e-05	1.08752e-05	1.23942e-05
0.1.30.1.7.4	Bacteria;Elusimicrobia;Elusimicrobia;Lineage_IV;uncultured_Termite_group_1_bacterium	0.000128009	0.000806994	0.000611527	6.64187e-05	2.80564e-05	5.06252e-05	1.35448e-05	9.30293e-06	0	0
0.1.45.9.4.1	Bacteria;Proteobacteria;Epsilonproteobacteria;Campylobacterales;Campylobacteraceae	0.000126389	0.000537996	0.000633368	0	5.61128e-05	6.32815e-05	1.35448e-05	0	0	0.000136336
0.1.24.3.1.1	Bacteria;Chloroflexi;Caldilineae;Caldilineales;Caldilineaceae	0.000124769	0.000288212	0.000349444	6.64187e-05	0.000126254	8.85941e-05	5.41793e-05	3.72117e-05	9.78772e-05	0.00014873
0.1.45.7.9.4	Bacteria;Proteobacteria;Deltaproteobacteria;Desulfovibrionales;Desulfovibrionaceae	0.000124769	0.000211356	0.000262083	0	0.000350705	0.000227813	0	2.79088e-05	4.3501e-05	4.95767e-05
0.1.59.1.1.1	Bacteria;WCHB1-60;unclassified;unclassified;unclassified	0.000124769	9.60707e-05	4.36805e-05	0.000199256	0.000126254	0.000189845	9.48137e-05	7.44235e-05	8.70019e-05	0.000247884
0.1.7.9.11.1	Bacteria;Bacteroidetes;SB-1;uncultured_Bacteroidetes_bacterium;unclassified	0.000119908	0	0	0	0.00039279	0.000455627	0	3.72117e-05	2.17505e-05	4.95767e-05
0.1.7.13.1.1	Bacteria;Bacteroidetes;Sphingobacteriia;Sphingobacteriales;AKYH767	0.000119908	0.000749352	0.000633368	0	1.40282e-05	1.26563e-05	1.35448e-05	0	3.26257e-05	0
0.1.30.1.4.8	Bacteria;Elusimicrobia;Elusimicrobia;Lineage_IIa;uncultured_soil_bacterium	0.000119908	0.000749352	0.000567847	0	4.20846e-05	7.59378e-05	0	0	0	0
0.1.45.11.51.8	Bacteria;Proteobacteria;Gammaproteobacteria;Thiotrichales;Thiotrichaceae	0.000119908	0.000288212	0.000480486	0.000265675	0.000112226	0.000139219	0	9.30293e-06	7.61267e-05	7.43651e-05
0.1.32.2.2.26	Bacteria;Firmicutes;Clostridia;Clostridiales;Peptococcaceae	0.000118287	5.76424e-05	0	0.000464931	0.000168338	0.000126563	5.41793e-05	0.000306997	1.08752e-05	3.71826e-05
0.1.45.7.8.3	Bacteria;Proteobacteria;Deltaproteobacteria;Desulfobacterales;Nitrospinaceae	0.000118287	0.000595638	0.000458645	0	0.000126254	0.00010125	0	0	3.26257e-05	1.23942e-05
0.1.45.11.33.3	Bacteria;Proteobacteria;Gammaproteobacteria;Methylococcales;Crenotrichaceae	0.000118287	0.000614853	0.000742569	0	1.40282e-05	6.32815e-05	0	0	1.08752e-05	0
0.1.2.2.13.6	Bacteria;Actinobacteria;Actinobacteria;PeM15;unclassified	0.000116667	0.000499568	0.000720729	0	0	2.53126e-05	2.70896e-05	9.30293e-06	3.26257e-05	6.19709e-05
0.1.45.4.16.16	Bacteria;Proteobacteria;Alphaproteobacteria;Rickettsiales;TK34	0.000116667	0.00032664	0.000502326	0.000132837	0.000140282	0.000151876	0	0	4.3501e-05	4.95767e-05
0.1.15.9.1.1	Bacteria;Candidate_division_OP3;uncultured_Verrucomicrobia_bacterium;unclassified;unclassified	0.000113426	0.000365069	0.000414965	0	4.20846e-05	0.000367033	0	0	0	0
0.1.45.11.34.13	Bacteria;Proteobacteria;Gammaproteobacteria;NKB5;uncultured_proteobacterium	0.000113426	0.000365069	0.000349444	0	7.0141e-05	0	0	0	0.000119628	0.00023549
0.1.49.6.1.1	Bacteria;SHA-109;uncultured_bacterium;unclassified;unclassified	0.000110185	5.76424e-05	4.36805e-05	0	0.00015431	0.000126563	0	0	0.000293631	0.000185913
0.1.44.9.1.1	Bacteria;Planctomycetes;Pla4_lineage;unclassified;unclassified	0.000106945	0.000480354	0.000655208	0	7.0141e-05	5.06252e-05	0	0	2.17505e-05	0
0.1.24.22.1.1	Bacteria;Chloroflexi;unclassified;unclassified;unclassified	0.000105324	0.000345855	0.000262083	0.000199256	5.61128e-05	8.85941e-05	0.000148993	3.72117e-05	4.3501e-05	2.47884e-05
0.1.30.1.12.1	Bacteria;Elusimicrobia;Elusimicrobia;unclassified;unclassified	0.000105324	0.000576424	0.000502326	0.000132837	4.20846e-05	7.59378e-05	0	0	1.08752e-05	0
0.1.1.1.18.4	Bacteria;Acidobacteria;Acidobacteria;Subgroup_4;RB41	0.000102083	0.000422711	0.000633368	0	0	1.26563e-05	0	9.30293e-06	5.43762e-05	6.19709e-05
0.1.45.11.29.3	Bacteria;Proteobacteria;Gammaproteobacteria;KI89A_clade;unclassified	0.000102083	0.000172927	0.000436805	0	0.000140282	0.000278439	0	0	1.08752e-05	1.23942e-05
0.1.45.11.36.11	Bacteria;Proteobacteria;Gammaproteobacteria;Oceanospirillales;Halomonadaceae	0.000102083	0.000576424	0.000524166	0	0	3.79689e-05	0	0	4.3501e-05	2.47884e-05
0.1.32.1.2.7	Bacteria;Firmicutes;Bacilli;Bacillales;Paenibacillaceae	0.000100463	0.000249784	0.000633368	0	0	0.00010125	0	0	5.43762e-05	8.67593e-05
0.1.45.4.16.7	Bacteria;Proteobacteria;Alphaproteobacteria;Rickettsiales;RB446	0.000100463	7.68566e-05	6.55208e-05	0	0.00015431	3.79689e-05	1.35448e-05	0	0.00020663	0.000260278
0.1.45.11.36.6	Bacteria;Proteobacteria;Gammaproteobacteria;Oceanospirillales;CrystalBog021C3	0.000100463	9.60707e-05	6.55208e-05	0.000265675	0.00030862	0.00010125	0	0	0.000130503	9.91535e-05
0.1.26.4.1.2	Bacteria;Cyanobacteria;Melainabacteria;Caenarcaniphilales;uncultured_Gram-positive_bacterium	9.72224e-05	7.68566e-05	0	0	8.41692e-05	1.26563e-05	0	0	0.000271881	0.00029746
0.1.58.3.7.1	Bacteria;Verrucomicrobia;Opitutae;Puniceicoccales;Puniceicoccaceae	9.72224e-05	0.000211356	0.000174722	0	0.000168338	0.000367033	0	0	0	0
0.1.45.11.54.3	Bacteria;Proteobacteria;Gammaproteobacteria;Xanthomonadales;Nevskiaceae	9.39816e-05	0.000576424	0.000524166	0	0	2.53126e-05	0	0	2.17505e-05	0
0.1.7.9.9.1	Bacteria;Bacteroidetes;SB-1;unclassified;unclassified	9.23612e-05	0	4.36805e-05	0	0.000280564	0.000329064	2.70896e-05	3.72117e-05	3.26257e-05	0
0.1.33.1.1.5	Bacteria;Fusobacteria;Fusobacteriia;Fusobacteriales;Leptotrichiaceae	8.91205e-05	0.000249784	0.000349444	0	9.81974e-05	0.000202501	1.35448e-05	0	0	2.47884e-05
0.1.45.7.11.18	Bacteria;Proteobacteria;Deltaproteobacteria;Desulfuromonadales;unclassified	8.91205e-05	7.68566e-05	0.000436805	0	0.000224451	0.000151876	0	0	1.08752e-05	2.47884e-05
0.1.45.11.31.3	Bacteria;Proteobacteria;Gammaproteobacteria;Legionellales;unclassified	8.91205e-05	0.000153713	6.55208e-05	6.64187e-05	0	1.26563e-05	0	0	0.000141378	0.000359431
0.1.1.1.20.61	Bacteria;Acidobacteria;Acidobacteria;Subgroup_6;uncultured_prokaryote	8.75001e-05	0.000211356	0.000262083	0	0.000140282	0.000177188	0	0	2.17505e-05	6.19709e-05
0.1.45.11.36.23	Bacteria;Proteobacteria;Gammaproteobacteria;Oceanospirillales;Oleiphilaceae	8.75001e-05	0.000403497	0.000546007	0	4.20846e-05	6.32815e-05	0	0	0	0
0.1.20.6.1.1	Bacteria;Candidate_division_WS3;unclassified;unclassified;unclassified	8.58797e-05	0.000365069	0.000436805	0	8.41692e-05	5.06252e-05	0	0	3.26257e-05	1.23942e-05
0.1.45.7.8.2	Bacteria;Proteobacteria;Deltaproteobacteria;Desulfobacterales;Desulfobulbaceae	8.42594e-05	0.000192141	0.000196562	0	8.41692e-05	0.000151876	0	0	6.52514e-05	0.000111548
0.1.2.11.1.1	Bacteria;Actinobacteria;Thermoleophilia;Gaiellales;Gaiellaceae	8.2639e-05	0.000307426	0.000393125	0	2.80564e-05	5.06252e-05	0	0	4.3501e-05	8.67593e-05
0.1.44.7.5.2	Bacteria;Planctomycetes;Phycisphaerae;CCM11a;unclassified	8.2639e-05	0.000307426	0.000349444	0	8.41692e-05	0.000126563	0	0	1.08752e-05	2.47884e-05
0.1.45.7.14.16	Bacteria;Proteobacteria;Deltaproteobacteria;Myxococcales;mle1-27	8.2639e-05	0.000115285	0.000327604	0.000132837	0.000210423	0.000113907	1.35448e-05	1.86059e-05	0	1.23942e-05
0.1.7.6.1.8	Bacteria;Bacteroidetes;Flavobacteriia;Flavobacteriales;unclassified	8.10186e-05	0.000365069	0.000174722	0	7.0141e-05	0.00010125	0	0	5.43762e-05	6.19709e-05
0.1.44.7.17.16	Bacteria;Planctomycetes;Phycisphaerae;WD2101_soil_group;uncultured_planctomycete	8.10186e-05	0	0	0	0.000182367	0.000151876	0	0	0.000152253	0.000136336
0.1.58.5.1.3	Bacteria;Verrucomicrobia;Spartobacteria;Chthoniobacterales;DA101_soil_group	8.10186e-05	0.000249784	0.000589687	0	0	0	1.35448e-05	0	6.52514e-05	3.71826e-05
0.1.2.1.1.7	Bacteria;Actinobacteria;Acidimicrobiia;Acidimicrobiales;uncultured	7.93983e-05	0.000153713	0.000305764	0	0.000140282	8.85941e-05	0	0	4.3501e-05	7.43651e-05
0.1.45.11.54.7	Bacteria;Proteobacteria;Gammaproteobacteria;Xanthomonadales;unclassified	7.93983e-05	0.000153713	8.7361e-05	6.64187e-05	5.61128e-05	5.06252e-05	0.000108359	0.000139544	4.3501e-05	1.23942e-05
0.1.1.1.10.1	Bacteria;Acidobacteria;Acidobacteria;Subgroup_17;unclassified	7.77779e-05	0.00023057	0.000393125	0	8.41692e-05	7.59378e-05	0	0	3.26257e-05	3.71826e-05
0.1.1.1.19.7	Bacteria;Acidobacteria;Acidobacteria;Subgroup_5;uncultured_bacterium	7.77779e-05	0.000384283	0.000436805	0.000132837	1.40282e-05	5.06252e-05	1.35448e-05	0	0	0
0.1.7.4.1.28	Bacteria;Bacteroidetes;Bacteroidia;Bacteroidales;unclassified	7.77779e-05	0.000192141	0.000109201	6.64187e-05	1.40282e-05	3.79689e-05	0.000108359	0.000139544	1.08752e-05	4.95767e-05
0.1.54.15.1.1	Bacteria;TM6;uncultured_candidate_division_TM6_bacterium;unclassified;unclassified	7.77779e-05	1.92141e-05	4.36805e-05	0.000464931	0	0	0.000189627	0.000204664	1.08752e-05	1.23942e-05
0.1.44.9.4.1	Bacteria;Planctomycetes;Pla4_lineage;uncultured_bacterium;unclassified	7.61575e-05	0.00032664	0.000480486	0	4.20846e-05	6.32815e-05	0	0	0	0
0.1.45.4.13.16	Bacteria;Proteobacteria;Alphaproteobacteria;Rhizobiales;F0723	7.61575e-05	5.76424e-05	6.55208e-05	0	5.61128e-05	5.06252e-05	0.000203172	9.30293e-06	8.70019e-05	0.000111548
0.1.44.6.6.1	Bacteria;Planctomycetes;OM190;uncultured_Planctomycetales_bacterium;unclassified	7.45371e-05	0.000172927	0.000196562	0	0.000112226	0.000253126	0	0	0	0
0.1.45.4.16.6	Bacteria;Proteobacteria;Alphaproteobacteria;Rickettsiales;LWSR-14	7.45371e-05	9.60707e-05	6.55208e-05	0	7.0141e-05	6.32815e-05	2.70896e-05	0.000148847	7.61267e-05	3.71826e-05
0.1.14.12.1.1	Bacteria;Candidate_division_OP11;uncultured_Microgenomates_bacterium;unclassified;unclassified	7.29168e-05	9.60707e-05	0	0	2.80564e-05	1.26563e-05	0	0	9.78772e-05	0.000347037
0.1.1.1.17.7	Bacteria;Acidobacteria;Acidobacteria;Subgroup_3;SJA-149	7.12964e-05	9.60707e-05	0.000240243	0.000132837	0.000112226	0.000151876	1.35448e-05	2.79088e-05	1.08752e-05	1.23942e-05
0.1.44.1.2.1	Bacteria;Planctomycetes;028H05-P-BN-P5;uncultured_bacterium;unclassified	7.12964e-05	0.000422711	0.000393125	0	0	5.06252e-05	0	0	0	0
0.1.44.14.4.1	Bacteria;Planctomycetes;vadinHA49;uncultured_Antarctic_bacterium_LB3-13;unclassified	7.12964e-05	0.000365069	0.000480486	6.64187e-05	0	2.53126e-05	0	0	0	0
0.1.45.6.15.11	Bacteria;Proteobacteria;Betaproteobacteria;SC-I-84;unclassified	7.12964e-05	0.000268998	0.000546007	0	0	0	0	0	0	6.19709e-05
0.1.45.11.51.2	Bacteria;Proteobacteria;Gammaproteobacteria;Thiotrichales;CHAB-XI-27	7.12964e-05	0.000153713	0.000109201	6.64187e-05	0.000112226	0.000189845	0	0	5.43762e-05	2.47884e-05
0.1.7.15.2.1	Bacteria;Bacteroidetes;WCHB1-32;unclassified;unclassified	6.9676e-05	7.68566e-05	0.000218403	0	0.00015431	0.000177188	0	0	1.08752e-05	3.71826e-05
0.1.2.2.11.16	Bacteria;Actinobacteria;Actinobacteria;Micrococcales;Micrococcaceae	6.64353e-05	0.000134499	0.000174722	0	0	2.53126e-05	1.35448e-05	0	2.17505e-05	0.000260278
0.1.2.12.1.1	Bacteria;Actinobacteria;unclassified;unclassified;unclassified	6.48149e-05	0.000134499	0.000174722	6.64187e-05	2.80564e-05	0	4.06344e-05	3.72117e-05	3.26257e-05	0.00014873
0.1.26.3.7.1	Bacteria;Cyanobacteria;ML635J-21;uncultured_bacterium;unclassified	6.48149e-05	0.000134499	0.000152882	0	0.000210423	0.000126563	0	0	1.08752e-05	0
0.1.27.1.1.4	Bacteria;Deferribacteres;Deferribacteres;Deferribacterales;PAUC34f	6.48149e-05	0.000307426	0.000174722	0	5.61128e-05	0.000113907	0	0	3.26257e-05	0
0.1.45.6.3.3	Bacteria;Proteobacteria;Betaproteobacteria;B1-7BS;uncultured_bacterium	6.48149e-05	0.000268998	0.000262083	0	0.000140282	3.79689e-05	0	0	0	1.23942e-05
0.1.45.7.14.4	Bacteria;Proteobacteria;Deltaproteobacteria;Myxococcales;Elev-16S-1158	6.48149e-05	0.000345855	0.000436805	0	2.80564e-05	0	0	0	0	0
0.1.58.3.13.7	Bacteria;Verrucomicrobia;Opitutae;vadinHA64;uncultured_bacterium	6.48149e-05	0.000461139	0.000327604	0	1.40282e-05	0	0	0	0	0
0.1.7.14.8.1	Bacteria;Bacteroidetes;VC2.1_Bac22;uncultured_Sphingobacteria_bacterium;unclassified	6.31945e-05	0	0	0.000132837	4.20846e-05	1.26563e-05	0.000311531	7.44235e-05	2.17505e-05	0
0.1.26.4.3.2	Bacteria;Cyanobacteria;Melainabacteria;Obscuribacterales;unclassified	6.31945e-05	0.00032664	0.000305764	0	4.20846e-05	2.53126e-05	0	0	2.17505e-05	1.23942e-05
0.1.45.20.16.1	Bacteria;Proteobacteria;TA18;uncultured_delta_proteobacterium;unclassified	6.31945e-05	0	2.18403e-05	0	2.80564e-05	7.59378e-05	0	0	5.43762e-05	0.000309855
0.1.1.2.7.1	Bacteria;Acidobacteria;Holophagae;Subgroup_10;ABS-19	6.15742e-05	0.000211356	0.000546007	0	0	1.26563e-05	0	0	1.08752e-05	0
0.1.30.1.10.1	Bacteria;Elusimicrobia;Elusimicrobia;MVP-88;unclassified	6.15742e-05	0.000422711	0.000327604	0	1.40282e-05	0	0	0	0	0
0.1.45.7.11.10	Bacteria;Proteobacteria;Deltaproteobacteria;Desulfuromonadales;Geobacteraceae	6.15742e-05	0.000115285	6.55208e-05	0	5.61128e-05	0.000189845	2.70896e-05	1.86059e-05	1.08752e-05	6.19709e-05
0.1.1.3.1.1	Bacteria;Acidobacteria;Subgroup_22;unclassified;unclassified	5.99538e-05	9.60707e-05	0.000436805	0	7.0141e-05	2.53126e-05	0	0	2.17505e-05	3.71826e-05
0.1.7.15.6.1	Bacteria;Bacteroidetes;WCHB1-32;uncultured_bacterium;unclassified	5.99538e-05	5.76424e-05	0.000152882	0	9.81974e-05	0.00024047	0	0	0	1.23942e-05
0.1.26.4.5.1	Bacteria;Cyanobacteria;Melainabacteria;unclassified;unclassified	5.99538e-05	3.84283e-05	8.7361e-05	0	8.41692e-05	7.59378e-05	0	1.86059e-05	7.61267e-05	0.000123942
0.1.41.7.1.1	Bacteria;NPL-UPA2;uncultured_bacterium;unclassified;unclassified	5.99538e-05	0.00032664	0.000283923	0	4.20846e-05	2.53126e-05	0	9.30293e-06	0	1.23942e-05
0.1.2.11.1.3	Bacteria;Actinobacteria;Thermoleophilia;Gaiellales;uncultured	5.83334e-05	0.000211356	0.000262083	0	4.20846e-05	2.53126e-05	0	0	1.08752e-05	8.67593e-05
0.1.4.1.1.2	Bacteria;Armatimonadetes;Armatimonadia;Armatimonadales;unclassified	5.83334e-05	0.000134499	0.000174722	0	0	5.06252e-05	2.70896e-05	4.65147e-05	8.70019e-05	2.47884e-05
0.1.13.16.1.1	Bacteria;Candidate_division_OD1;uncultured_Parcubacteria_bacterium;unclassified;unclassified	5.83334e-05	3.84283e-05	0	0.000132837	2.80564e-05	2.53126e-05	0.000108359	0.000130241	1.08752e-05	6.19709e-05
0.1.30.1.5.1	Bacteria;Elusimicrobia;Elusimicrobia;Lineage_IIb;unclassified	5.83334e-05	0.000384283	0.000131042	0	2.80564e-05	6.32815e-05	0	9.30293e-06	1.08752e-05	1.23942e-05
0.1.40.12.1.1	Bacteria;Lentisphaerae;Lentisphaeria;Lentisphaerales;Lentisphaeraceae	5.83334e-05	0.000288212	0.000371284	0	0	5.06252e-05	0	0	0	0
0.1.44.6.4.1	Bacteria;Planctomycetes;OM190;uncultured_Planctomyces_sp.;unclassified	5.83334e-05	0.000268998	0.000218403	0	7.0141e-05	7.59378e-05	0	0	0	1.23942e-05
0.1.58.8.1.2	Bacteria;Verrucomicrobia;Verrucomicrobiae;Verrucomicrobiales;DEV007	5.83334e-05	5.76424e-05	0.000109201	0	5.61128e-05	0.000113907	0	9.30293e-06	5.43762e-05	0.000111548
0.1.7.12.2.1	Bacteria;Bacteroidetes;SM1A07;unclassified;unclassified	5.6713e-05	5.76424e-05	8.7361e-05	6.64187e-05	7.0141e-05	0.000215157	1.35448e-05	9.30293e-06	1.08752e-05	2.47884e-05
0.1.20.8.1.1	Bacteria;Candidate_division_WS3;uncultured_Acidobacterium_sp.;unclassified;unclassified	5.6713e-05	0.00023057	0.000174722	0	4.20846e-05	3.79689e-05	1.35448e-05	0	6.52514e-05	2.47884e-05
0.1.24.20.4.1	Bacteria;Chloroflexi;TK10;unclassified;unclassified	5.6713e-05	0.000268998	0.000174722	6.64187e-05	4.20846e-05	1.26563e-05	2.70896e-05	0	2.17505e-05	4.95767e-05
0.1.45.11.2.2	Bacteria;Proteobacteria;Gammaproteobacteria;195up;uncultured_bacterium	5.6713e-05	0.000307426	0.000414965	0	0	0	0	0	0	0
0.1.45.11.34.2	Bacteria;Proteobacteria;Gammaproteobacteria;NKB5;Legionella-like_amoebal_pathogen_HT99	5.6713e-05	0.000115285	4.36805e-05	0	0	2.53126e-05	0	0	7.61267e-05	0.000223095
0.1.49.5.1.1	Bacteria;SHA-109;uncultured_alpha_proteobacterium;unclassified;unclassified	5.6713e-05	3.84283e-05	2.18403e-05	6.64187e-05	7.0141e-05	6.32815e-05	0	0	0.000119628	0.000123942
0.1.58.2.25.1	Bacteria;Verrucomicrobia;OPB35_soil_group;uncultured_Verrucomicrobia_bacterium;unclassified	5.6713e-05	0.000249784	0.000349444	0	4.20846e-05	3.79689e-05	0	0	0	0
0.1.1.1.20.30	Bacteria;Acidobacteria;Acidobacteria;Subgroup_6;uncultured_bacterium	5.50927e-05	0.000192141	0.000283923	0	8.41692e-05	6.32815e-05	0	0	0	0
0.1.10.10.1.1	Bacteria;Candidate_division_BRC1;uncultured_bacterium;unclassified;unclassified	5.50927e-05	0.000153713	0.000327604	0	7.0141e-05	2.53126e-05	0	0	1.08752e-05	3.71826e-05
0.1.26.4.3.8	Bacteria;Cyanobacteria;Melainabacteria;Obscuribacterales;uncultured_cyanobacterium	5.34723e-05	0.00023057	0.000262083	0	4.20846e-05	6.32815e-05	0	9.30293e-06	0	0
0.1.45.7.20.1	Bacteria;Proteobacteria;Deltaproteobacteria;Syntrophobacterales;Syntrophaceae	5.34723e-05	5.76424e-05	0.000109201	0	0.000112226	0.000126563	1.35448e-05	2.79088e-05	0	3.71826e-05
0.1.45.11.38.1	Bacteria;Proteobacteria;Gammaproteobacteria;Order_Incertae_Sedis;Family_Incertae_Sedis	5.34723e-05	9.60707e-05	0.000502326	0	1.40282e-05	2.53126e-05	0	0	0	2.47884e-05
0.1.2.2.15.1	Bacteria;Actinobacteria;Actinobacteria;Pseudonocardiales;Pseudonocardiaceae	5.18519e-05	0.000192141	0.000458645	0	0	0	0	0	0	1.23942e-05
0.1.4.2.1.1	Bacteria;Armatimonadetes;Chthonomonadetes;Chthonomonadales;Chthonomonadaceae	5.18519e-05	0.000134499	0.000109201	0	2.80564e-05	8.85941e-05	4.06344e-05	0	3.26257e-05	6.19709e-05
0.1.45.6.12.1	Bacteria;Proteobacteria;Betaproteobacteria;Nitrosomonadales;Gallionellaceae	5.18519e-05	0.000384283	0.000152882	0.000132837	1.40282e-05	0	0	0	1.08752e-05	1.23942e-05
0.1.45.4.13.22	Bacteria;Proteobacteria;Alphaproteobacteria;Rhizobiales;KF-JG30-B3	5.02316e-05	0.000172927	0.000305764	0	2.80564e-05	6.32815e-05	0	0	1.08752e-05	0
0.1.53.5.1.1	Bacteria;TA06;uncultured_bacterium;unclassified;unclassified	5.02316e-05	3.84283e-05	0	0	0.000196395	8.85941e-05	0	0	5.43762e-05	3.71826e-05
0.1.4.1.1.1	Bacteria;Armatimonadetes;Armatimonadia;Armatimonadales;Armatimonadaceae	4.86112e-05	0.000268998	0.000152882	0	5.61128e-05	3.79689e-05	0	9.30293e-06	0	1.23942e-05
0.1.7.9.4.1	Bacteria;Bacteroidetes;SB-1;Bacteroidetes_bacterium_enrichment_culture_clone_VNC3B008;unclassified	4.86112e-05	0	0	0	0	0	0.000108359	0.000204664	0	0
0.1.22.1.1.1	Bacteria;Chlamydiae;Chlamydiae;Chlamydiales;Chlamydiaceae	4.86112e-05	0.000172927	0.000174722	6.64187e-05	4.20846e-05	0	0	0	4.3501e-05	6.19709e-05
0.1.45.4.15.11	Bacteria;Proteobacteria;Alphaproteobacteria;Rhodospirillales;MNC12	4.86112e-05	0.000153713	0.000152882	0	1.40282e-05	0.000139219	1.35448e-05	0	2.17505e-05	0
0.1.45.7.16.6	Bacteria;Proteobacteria;Deltaproteobacteria;SAR324_clade(Marine_group_B);unclassified	4.86112e-05	0.000307426	0.000305764	0	0	0	0	0	0	0
0.1.58.2.10.1	Bacteria;Verrucomicrobia;OPB35_soil_group;bacterium_Ellin517;unclassified	4.86112e-05	0.000153713	0.000262083	0	4.20846e-05	7.59378e-05	0	0	1.08752e-05	0
0.1.2.2.10.1	Bacteria;Actinobacteria;Actinobacteria;Kineosporiales;Kineosporiaceae	4.69908e-05	0.000211356	0.000371284	0	1.40282e-05	0	0	0	0	0
0.1.19.25.1.1	Bacteria;Candidate_division_TM7;uncultured_bacterium;unclassified;unclassified	4.69908e-05	1.92141e-05	0	0	0	2.53126e-05	0	0	3.26257e-05	0.000285066
0.1.8.3.1.1	Bacteria;CKC4;uncultured_bacterium;unclassified;unclassified	4.69908e-05	0	0	0	0.00015431	0.000113907	0	0	2.17505e-05	8.67593e-05
0.1.32.1.2.14	Bacteria;Firmicutes;Bacilli;Bacillales;unclassified	4.69908e-05	0.000172927	0.000174722	0	0	0	0	0	2.17505e-05	0.000123942
0.1.32.2.2.13	Bacteria;Firmicutes;Clostridia;Clostridiales;Family_XIII	4.69908e-05	0.000153713	6.55208e-05	0	8.41692e-05	3.79689e-05	0	7.44235e-05	0	1.23942e-05
0.1.36.1.2.3	Bacteria;Gemmatimonadetes;Gemmatimonadetes;BD2-11_terrestrial_group;unclassified	4.69908e-05	0.000192141	0.000152882	0	8.41692e-05	3.79689e-05	0	9.30293e-06	2.17505e-05	0
0.1.1.1.3.1	Bacteria;Acidobacteria;Acidobacteria;Acidobacteriales;Acidobacteriaceae_(Subgroup_1)	4.53704e-05	5.76424e-05	0.000436805	0	1.40282e-05	2.53126e-05	0	0	2.17505e-05	0
0.1.2.2.8.4	Bacteria;Actinobacteria;Actinobacteria;Frankiales;Geodermatophilaceae	4.53704e-05	0.00023057	0.000131042	0	2.80564e-05	3.79689e-05	0	0	1.08752e-05	4.95767e-05
0.1.2.2.12.1	Bacteria;Actinobacteria;Actinobacteria;Micromonosporales;Micromonosporaceae	4.53704e-05	0.000365069	0.000152882	0	0	0	1.35448e-05	0	0	1.23942e-05
0.1.7.14.4.1	Bacteria;Bacteroidetes;VC2.1_Bac22;unclassified;unclassified	4.53704e-05	0.000115285	0.000131042	0	7.0141e-05	6.32815e-05	1.35448e-05	0	2.17505e-05	3.71826e-05
0.1.26.4.3.4	Bacteria;Cyanobacteria;Melainabacteria;Obscuribacterales;uncultured_Gloeobacter_sp.	4.53704e-05	3.84283e-05	6.55208e-05	0	0.000168338	0.000126563	1.35448e-05	0	0	0
0.1.32.1.5.4	Bacteria;Firmicutes;Bacilli;Lactobacillales;Enterococcaceae	4.53704e-05	0.000134499	8.7361e-05	0	7.0141e-05	6.32815e-05	0	0	2.17505e-05	6.19709e-05
0.1.44.7.5.6	Bacteria;Planctomycetes;Phycisphaerae;CCM11a;uncultured_bacterium	4.53704e-05	0.000115285	0.000218403	0	5.61128e-05	8.85941e-05	0	0	0	1.23942e-05
0.1.1.1.20.22	Bacteria;Acidobacteria;Acidobacteria;Subgroup_6;uncultured_Acidobacterium_sp.	4.37501e-05	5.76424e-05	0.000196562	0	7.0141e-05	0.000126563	0	0	0	0
0.1.13.25.1.1	Bacteria;Candidate_division_OD1;uncultured_eubacterium_WCHB1-58;unclassified;unclassified	4.37501e-05	3.84283e-05	4.36805e-05	0	2.80564e-05	0	0	0	0.000141378	9.91535e-05
0.1.17.3.1.1	Bacteria;Candidate_division_OP9;unclassified;unclassified;unclassified	4.37501e-05	0	0	0.000199256	0	0	0.000108359	0.000139544	0	1.23942e-05
0.1.24.17.4.1	Bacteria;Chloroflexi;SAR202_clade;unclassified;unclassified	4.37501e-05	0.000192141	0.000283923	6.64187e-05	0	2.53126e-05	0	0	1.08752e-05	0
0.1.32.2.2.4	Bacteria;Firmicutes;Clostridia;Clostridiales;Clostridiaceae_2	4.37501e-05	1.92141e-05	0	6.64187e-05	2.80564e-05	0.000151876	0	8.37264e-05	0	2.47884e-05
0.1.44.2.5.1	Bacteria;Planctomycetes;BD7-11;uncultured_bacterium;unclassified	4.37501e-05	7.68566e-05	0.000240243	0	4.20846e-05	0.000113907	0	0	0	0
0.1.45.7.14.3	Bacteria;Proteobacteria;Deltaproteobacteria;Myxococcales;Cystobacteraceae	4.37501e-05	0.000153713	0.000196562	0	4.20846e-05	6.32815e-05	0	1.86059e-05	0	0
0.1.45.11.54.2	Bacteria;Proteobacteria;Gammaproteobacteria;Xanthomonadales;JTB255_marine_benthic_group	4.37501e-05	0.000192141	0.000371284	0	0	0	0	0	0	0
0.1.32.1.2.9	Bacteria;Firmicutes;Bacilli;Bacillales;Planococcaceae	4.21297e-05	0.000153713	8.7361e-05	0	1.40282e-05	0	0	0	1.08752e-05	0.00014873
0.1.45.4.15.10	Bacteria;Proteobacteria;Alphaproteobacteria;Rhodospirillales;KCM-B-60	4.21297e-05	7.68566e-05	0.000218403	0	7.0141e-05	8.85941e-05	0	0	0	0
0.1.49.3.1.1	Bacteria;SHA-109;uncultured_Acidobacteria_bacterium;unclassified;unclassified	4.21297e-05	0	0	0.000132837	1.40282e-05	1.26563e-05	0	0.000130241	4.3501e-05	4.95767e-05
0.1.2.2.14.2	Bacteria;Actinobacteria;Actinobacteria;Propionibacteriales;Propionibacteriaceae	4.05093e-05	0.000249784	0.000262083	0	0	0	0	0	0	0
0.1.5.20.1.1	Bacteria;BD1-5;uncultured_bacterium_GKS2-174;unclassified;unclassified	4.05093e-05	7.68566e-05	2.18403e-05	0	7.0141e-05	6.32815e-05	0	0	3.26257e-05	8.67593e-05
0.1.44.14.5.1	Bacteria;Planctomycetes;vadinHA49;uncultured_Antarctic_bacterium_LB3-147;unclassified	4.05093e-05	1.92141e-05	4.36805e-05	6.64187e-05	8.41692e-05	0.00010125	0	0	3.26257e-05	4.95767e-05
0.1.2.1.1.1	Bacteria;Actinobacteria;Acidimicrobiia;Acidimicrobiales;Acidimicrobiaceae	3.88889e-05	0.000134499	0.000196562	0	2.80564e-05	0	0	9.30293e-06	1.08752e-05	4.95767e-05
0.1.45.4.13.6	Bacteria;Proteobacteria;Alphaproteobacteria;Rhizobiales;BCf3-20	3.88889e-05	0.000134499	4.36805e-05	0	4.20846e-05	0	0	0	3.26257e-05	0.000111548
0.1.45.4.13.18	Bacteria;Proteobacteria;Alphaproteobacteria;Rhizobiales;FukuN57	3.88889e-05	0.000115285	0.000131042	0	2.80564e-05	6.32815e-05	0	0	0	6.19709e-05
0.1.45.7.13.24	Bacteria;Proteobacteria;Deltaproteobacteria;GR-WP33-30;uncultured_prokaryote	3.88889e-05	0.000172927	0.000262083	0	1.40282e-05	1.26563e-05	0	0	0	1.23942e-05
0.1.58.5.1.10	Bacteria;Verrucomicrobia;Spartobacteria;Chthoniobacterales;zEL20	3.88889e-05	0	0	0	4.20846e-05	3.79689e-05	0	9.30293e-06	7.61267e-05	0.000123942
0.1.59.8.1.1	Bacteria;WCHB1-60;uncultured_candidate_division_WS5_bacterium;unclassified;unclassified	3.88889e-05	5.76424e-05	2.18403e-05	0	2.80564e-05	0	0	1.86059e-05	3.26257e-05	0.000161124
0.1.32.2.2.2	Bacteria;Firmicutes;Clostridia;Clostridiales;Christensenellaceae	3.72686e-05	0.000134499	0.000131042	0.000132837	2.80564e-05	5.06252e-05	0	0	0	2.47884e-05
0.1.44.9.2.1	Bacteria;Planctomycetes;Pla4_lineage;uncultured_Planctomycetaceae_bacterium;unclassified	3.72686e-05	7.68566e-05	0.000174722	0	4.20846e-05	0.00010125	0	0	0	0
0.1.45.11.51.7	Bacteria;Proteobacteria;Gammaproteobacteria;Thiotrichales;Piscirickettsiaceae	3.72686e-05	1.92141e-05	0	0	1.40282e-05	0.000177188	1.35448e-05	9.30293e-06	3.26257e-05	2.47884e-05
0.1.1.2.7.2	Bacteria;Acidobacteria;Holophagae;Subgroup_10;CA002	3.56482e-05	7.68566e-05	0.000327604	0	4.20846e-05	0	0	0	0	0
0.1.14.4.1.1	Bacteria;Candidate_division_OP11;Microgenomates_bacterium_SCGC_AAA011-L6;unclassified;unclassified	3.56482e-05	3.84283e-05	2.18403e-05	0	1.40282e-05	0	0	0	1.08752e-05	0.000210701
0.1.44.7.5.3	Bacteria;Planctomycetes;Phycisphaerae;CCM11a;uncultured_Planctomycetaceae_bacterium	3.56482e-05	0.000172927	0.000174722	0	2.80564e-05	2.53126e-05	0	0	0	1.23942e-05
0.1.45.9.4.2	Bacteria;Proteobacteria;Epsilonproteobacteria;Campylobacterales;Helicobacteraceae	3.56482e-05	0.000192141	0.000152882	0	1.40282e-05	1.26563e-05	0	0	1.08752e-05	2.47884e-05
0.1.45.11.34.3	Bacteria;Proteobacteria;Gammaproteobacteria;NKB5;Trachelomonas_scabra	3.56482e-05	7.68566e-05	0.000196562	0	5.61128e-05	5.06252e-05	0	0	1.08752e-05	0
0.1.45.13.3.1	Bacteria;Proteobacteria;MACA-EFT26;uncultured_bacterium;unclassified	3.56482e-05	0.000153713	0.000174722	0	5.61128e-05	2.53126e-05	0	0	0	0
0.1.54.24.1.1	Bacteria;TM6;uncultured_soil_bacterium;unclassified;unclassified	3.56482e-05	0.000115285	0.000109201	0	2.80564e-05	0	0	0	6.52514e-05	3.71826e-05
0.1.2.2.6.3	Bacteria;Actinobacteria;Actinobacteria;Corynebacteriales;Dietziaceae	3.40278e-05	0.000345855	2.18403e-05	0	0	1.26563e-05	1.35448e-05	0	0	0
0.1.4.9.1.1	Bacteria;Armatimonadetes;uncultured_Armatimonadetes_bacterium;unclassified;unclassified	3.40278e-05	9.60707e-05	0.000152882	0	2.80564e-05	2.53126e-05	0	9.30293e-06	2.17505e-05	2.47884e-05
0.1.32.1.5.13	Bacteria;Firmicutes;Bacilli;Lactobacillales;Streptococcaceae	3.40278e-05	0.000192141	0.000131042	0	2.80564e-05	1.26563e-05	1.35448e-05	0	0	1.23942e-05
0.1.44.8.3.1	Bacteria;Planctomycetes;Pla3_lineage;uncultured_bacterium;unclassified	3.40278e-05	0.000153713	0.000240243	0	1.40282e-05	1.26563e-05	0	0	0	0
0.1.23.1.1.3	Bacteria;Chlorobi;Chlorobia;Chlorobiales;SJA-28	3.24075e-05	3.84283e-05	8.7361e-05	6.64187e-05	1.40282e-05	3.79689e-05	1.35448e-05	0	1.08752e-05	8.67593e-05
0.1.32.1.5.3	Bacteria;Firmicutes;Bacilli;Lactobacillales;Carnobacteriaceae	3.24075e-05	0.000153713	0.000218403	6.64187e-05	0	1.26563e-05	0	0	0	0
0.1.44.8.1.1	Bacteria;Planctomycetes;Pla3_lineage;unclassified;unclassified	3.24075e-05	0.000211356	0.000152882	0	1.40282e-05	1.26563e-05	0	0	0	0
0.1.45.4.13.11	Bacteria;Proteobacteria;Alphaproteobacteria;Rhizobiales;C2U	3.24075e-05	0.000249784	0.000152882	0	0	0	0	0	0	0
0.1.45.4.15.4	Bacteria;Proteobacteria;Alphaproteobacteria;Rhodospirillales;B79	3.24075e-05	0.000211356	0.000174722	6.64187e-05	0	0	0	0	0	0
0.1.45.4.16.21	Bacteria;Proteobacteria;Alphaproteobacteria;Rickettsiales;uncultured_alpha_proteobacterium	3.24075e-05	7.68566e-05	6.55208e-05	0	7.0141e-05	8.85941e-05	0	0	1.08752e-05	0
0.1.1.2.6.1	Bacteria;Acidobacteria;Holophagae;Holophagales;Holophagaceae	3.07871e-05	0	0.000152882	0	4.20846e-05	5.06252e-05	0	1.86059e-05	1.08752e-05	2.47884e-05
0.1.24.9.6.1	Bacteria;Chloroflexi;JG30-KF-CM66;uncultured_bacterium;unclassified	3.07871e-05	9.60707e-05	8.7361e-05	0	2.80564e-05	0	0	0	3.26257e-05	6.19709e-05
0.1.40.25.1.1	Bacteria;Lentisphaerae;unclassified;unclassified;unclassified	3.07871e-05	0.000134499	0.000174722	0	2.80564e-05	2.53126e-05	0	0	0	0
0.1.45.11.51.9	Bacteria;Proteobacteria;Gammaproteobacteria;Thiotrichales;Thiotrichales_Incertae_Sedis	3.07871e-05	0	6.55208e-05	0	9.81974e-05	0.000113907	0	0	0	0
0.1.45.18.7.1	Bacteria;Proteobacteria;SPOTSOCT00m83;uncultured_sulfur-oxidizing_symbiont_bacterium;unclassified	3.07871e-05	1.92141e-05	4.36805e-05	0	8.41692e-05	6.32815e-05	0	0	1.08752e-05	4.95767e-05
0.1.49.4.1.1	Bacteria;SHA-109;uncultured_Firmicutes_bacterium;unclassified;unclassified	3.07871e-05	5.76424e-05	0.000109201	0	2.80564e-05	1.26563e-05	0	0	3.26257e-05	6.19709e-05
0.1.53.2.1.1	Bacteria;TA06;unclassified;unclassified;unclassified	3.07871e-05	3.84283e-05	8.7361e-05	0	2.80564e-05	2.53126e-05	1.35448e-05	3.72117e-05	4.3501e-05	0
0.1.2.1.1.6	Bacteria;Actinobacteria;Acidimicrobiia;Acidimicrobiales;unclassified	2.91667e-05	7.68566e-05	0	0	4.20846e-05	2.53126e-05	1.35448e-05	9.30293e-06	2.17505e-05	6.19709e-05
0.1.19.17.1.1	Bacteria;Candidate_division_TM7;metal-contaminated_soil_clone_K20-12;unclassified;unclassified	2.91667e-05	1.92141e-05	0	0	0	1.26563e-05	0	0	0	0.000198307
0.1.30.1.5.8	Bacteria;Elusimicrobia;Elusimicrobia;Lineage_IIb;uncultured_soil_bacterium	2.91667e-05	0.000211356	0	6.64187e-05	2.80564e-05	2.53126e-05	1.35448e-05	0	1.08752e-05	0
0.1.44.6.13.1	Bacteria;Planctomycetes;OM190;uncultured_soil_bacterium;unclassified	2.91667e-05	0.000115285	0.000196562	0	1.40282e-05	2.53126e-05	0	0	0	0
0.1.45.4.6.7	Bacteria;Proteobacteria;Alphaproteobacteria;DB1-14;uncultured_alpha_proteobacterium	2.91667e-05	3.84283e-05	4.36805e-05	0	5.61128e-05	0	2.70896e-05	6.51205e-05	1.08752e-05	0
0.1.45.4.13.4	Bacteria;Proteobacteria;Alphaproteobacteria;Rhizobiales;Aurantimonadaceae	2.91667e-05	0.000153713	0.000131042	6.64187e-05	0	0	4.06344e-05	0	0	0
0.1.45.7.11.9	Bacteria;Proteobacteria;Deltaproteobacteria;Desulfuromonadales;GR-WP33-58	2.91667e-05	9.60707e-05	0.000131042	0	4.20846e-05	5.06252e-05	0	0	0	0
0.1.45.16.9.1	Bacteria;Proteobacteria;SC3-20;uncultured_sulfur-oxidizing_symbiont_bacterium;unclassified	2.91667e-05	0.000115285	4.36805e-05	0	5.61128e-05	7.59378e-05	0	0	0	0
0.1.45.18.6.1	Bacteria;Proteobacteria;SPOTSOCT00m83;uncultured_proteobacterium;unclassified	2.91667e-05	5.76424e-05	0.000109201	0	4.20846e-05	8.85941e-05	0	0	0	0
0.1.1.1.20.59	Bacteria;Acidobacteria;Acidobacteria;Subgroup_6;uncultured_organism	2.75463e-05	5.76424e-05	4.36805e-05	0	1.40282e-05	6.32815e-05	0	0	1.08752e-05	6.19709e-05
0.1.2.2.11.12	Bacteria;Actinobacteria;Actinobacteria;Micrococcales;Intrasporangiaceae	2.75463e-05	0.000172927	0.000131042	0	0	0	0	0	1.08752e-05	1.23942e-05
0.1.44.2.1.1	Bacteria;Planctomycetes;BD7-11;unclassified;unclassified	2.75463e-05	7.68566e-05	8.7361e-05	0	2.80564e-05	3.79689e-05	0	0	2.17505e-05	2.47884e-05
0.1.45.4.20.1	Bacteria;Proteobacteria;Alphaproteobacteria;Sneathiellales;Sneathiellaceae	2.75463e-05	0.000134499	4.36805e-05	0	7.0141e-05	3.79689e-05	0	0	0	0
0.1.45.7.11.5	Bacteria;Proteobacteria;Deltaproteobacteria;Desulfuromonadales;BVA18	2.75463e-05	0	8.7361e-05	0	5.61128e-05	0.00010125	0	0	1.08752e-05	0
0.1.45.11.33.12	Bacteria;Proteobacteria;Gammaproteobacteria;Methylococcales;pLW-20	2.75463e-05	0.000192141	0.000152882	0	0	0	0	0	0	0
0.1.1.3.4.1	Bacteria;Acidobacteria;Subgroup_22;uncultured_Acidobacteriales_bacterium;unclassified	2.5926e-05	0.000153713	8.7361e-05	0	0	2.53126e-05	0	0	1.08752e-05	1.23942e-05
0.1.7.4.1.19	Bacteria;Bacteroidetes;Bacteroidia;Bacteroidales;Prevotellaceae	2.5926e-05	0.000115285	0.000109201	0	4.20846e-05	1.26563e-05	0	9.30293e-06	0	0
0.1.23.2.1.10	Bacteria;Chlorobi;Ignavibacteria;Ignavibacteriales;SR-FBR-L83	2.5926e-05	0	0	0	4.20846e-05	2.53126e-05	1.35448e-05	8.37264e-05	1.08752e-05	0
0.1.24.23.9.1	Bacteria;Chloroflexi;uncultured;uncultured_bacterium;unclassified	2.5926e-05	5.76424e-05	6.55208e-05	0.000199256	0	1.26563e-05	0	4.65147e-05	1.08752e-05	0
0.1.26.3.1.1	Bacteria;Cyanobacteria;ML635J-21;Azospirillum_sp._enrichment_culture_clone_yan50;unclassified	2.5926e-05	5.76424e-05	0.000283923	0	0	0	0	0	0	0
0.1.26.3.17.1	Bacteria;Cyanobacteria;ML635J-21;unidentified;unclassified	2.5926e-05	9.60707e-05	8.7361e-05	0	4.20846e-05	2.53126e-05	0	0	0	2.47884e-05
0.1.32.2.2.39	Bacteria;Firmicutes;Clostridia;Clostridiales;vadinBB60	2.5926e-05	0.000249784	2.18403e-05	0	1.40282e-05	0	1.35448e-05	0	0	0
0.1.40.12.2.1	Bacteria;Lentisphaerae;Lentisphaeria;Victivallales;Victivallaceae	2.5926e-05	5.76424e-05	6.55208e-05	0	8.41692e-05	3.79689e-05	0	0	1.08752e-05	0
0.1.45.7.5.3	Bacteria;Proteobacteria;Deltaproteobacteria;DTB120;uncultured_bacterium	2.5926e-05	0	2.18403e-05	0	0	0	4.06344e-05	0.000111635	0	0
0.1.2.1.1.4	Bacteria;Actinobacteria;Acidimicrobiia;Acidimicrobiales;OM1_clade	2.43056e-05	3.84283e-05	4.36805e-05	0	1.40282e-05	1.26563e-05	0	9.30293e-06	3.26257e-05	6.19709e-05
0.1.7.12.5.1	Bacteria;Bacteroidetes;SM1A07;uncultured_Flexibacter_sp.;unclassified	2.43056e-05	0	0	0	1.40282e-05	0.00010125	0	9.30293e-06	4.3501e-05	1.23942e-05
0.1.26.2.8.2	Bacteria;Cyanobacteria;Cyanobacteria;SubsectionIV;FamilyII	2.43056e-05	5.76424e-05	4.36805e-05	0	0	1.26563e-05	9.48137e-05	0	0	2.47884e-05
0.1.45.7.10.1	Bacteria;Proteobacteria;Deltaproteobacteria;Desulfurellales;Desulfurellaceae	2.43056e-05	5.76424e-05	0.000218403	0	0	1.26563e-05	0	0	0	1.23942e-05
0.1.45.7.18.12	Bacteria;Proteobacteria;Deltaproteobacteria;Sh765B-TzT-29;uncultured_Pelobacteraceae_bacterium	2.43056e-05	0	0.000152882	0	5.61128e-05	5.06252e-05	0	0	0	0
0.1.45.11.3.9	Bacteria;Proteobacteria;Gammaproteobacteria;34P16;uncultured_soil_bacterium	2.43056e-05	0.000153713	0.000152882	0	0	0	0	0	0	0
0.1.1.3.6.1	Bacteria;Acidobacteria;Subgroup_22;uncultured_bacterium;unclassified	2.26852e-05	9.60707e-05	8.7361e-05	0	0	0	1.35448e-05	0	3.26257e-05	1.23942e-05
0.1.2.2.8.8	Bacteria;Actinobacteria;Actinobacteria;Frankiales;uncultured	2.26852e-05	0.000134499	0.000131042	0	0	0	0	0	0	1.23942e-05
0.1.2.11.2.12	Bacteria;Actinobacteria;Thermoleophilia;Solirubrobacterales;Solirubrobacteraceae	2.26852e-05	3.84283e-05	0.000262083	0	0	0	0	0	0	0
0.1.12.10.1.1	Bacteria;Candidate_division_KB1;uncultured_bacterium;unclassified;unclassified	2.26852e-05	0	0	0.000132837	1.40282e-05	2.53126e-05	4.06344e-05	5.58176e-05	0	0
0.1.32.1.5.14	Bacteria;Firmicutes;Bacilli;Lactobacillales;unclassified	2.26852e-05	0	0	0	0.000126254	2.53126e-05	0	0	1.08752e-05	2.47884e-05
0.1.32.2.2.19	Bacteria;Firmicutes;Clostridia;Clostridiales;Gracilibacteraceae	2.26852e-05	0	8.7361e-05	0	1.40282e-05	2.53126e-05	1.35448e-05	2.79088e-05	0	3.71826e-05
0.1.44.7.18.5	Bacteria;Planctomycetes;Phycisphaerae;mle1-8;uncultured_bacterium	2.26852e-05	5.76424e-05	2.18403e-05	0	0	0	0	9.30293e-06	4.3501e-05	6.19709e-05
0.1.45.4.13.33	Bacteria;Proteobacteria;Alphaproteobacteria;Rhizobiales;Rhodobiaceae	2.26852e-05	3.84283e-05	0.000152882	0	0	0	1.35448e-05	0	1.08752e-05	3.71826e-05
0.1.45.7.11.15	Bacteria;Proteobacteria;Deltaproteobacteria;Desulfuromonadales;M20-Pitesti	2.26852e-05	0.000134499	0.000131042	0	0	1.26563e-05	0	0	0	0
0.1.45.18.1.1	Bacteria;Proteobacteria;SPOTSOCT00m83;unclassified;unclassified	2.26852e-05	5.76424e-05	0.000109201	0	4.20846e-05	2.53126e-05	0	0	1.08752e-05	0
0.1.58.2.38.1	Bacteria;Verrucomicrobia;OPB35_soil_group;uncultured_verrucomicrobium_DEV059;unclassified	2.26852e-05	5.76424e-05	0.000218403	0	0	1.26563e-05	0	0	0	0
0.1.1.1.19.2	Bacteria;Acidobacteria;Acidobacteria;Subgroup_5;uncultured_Acidobacteria_bacterium	2.10648e-05	0.000115285	0.000131042	0	1.40282e-05	0	0	0	0	0
0.1.1.1.19.4	Bacteria;Acidobacteria;Acidobacteria;Subgroup_5;uncultured_Acidobacteriales_bacterium	2.10648e-05	0.000115285	0.000131042	0	1.40282e-05	0	0	0	0	0
0.1.2.6.1.1	Bacteria;Actinobacteria;MB-A2-108;unclassified;unclassified	2.10648e-05	7.68566e-05	0.000196562	0	0	0	0	0	0	0
0.1.24.5.3.1	Bacteria;Chloroflexi;Chloroflexia;Herpetosiphonales;Herpetosiphonaceae	2.10648e-05	1.92141e-05	6.55208e-05	0	4.20846e-05	1.26563e-05	0	0	1.08752e-05	4.95767e-05
0.1.44.14.2.1	Bacteria;Planctomycetes;vadinHA49;bacterium_UW_659-2-F09;unclassified	2.10648e-05	3.84283e-05	0.000152882	0	5.61128e-05	0	0	0	0	0
0.1.45.4.16.2	Bacteria;Proteobacteria;Alphaproteobacteria;Rickettsiales;Anaplasmataceae	2.10648e-05	0.000172927	6.55208e-05	0	0	0	0	0	0	1.23942e-05
0.1.45.11.37.1	Bacteria;Proteobacteria;Gammaproteobacteria;Orbales;Orbaceae	2.10648e-05	7.68566e-05	0.000109201	6.64187e-05	4.20846e-05	0	0	0	0	0
0.1.55.1.6.2	Bacteria;Tenericutes;Mollicutes;Entomoplasmatales;Entomoplasmatales_Incertae_Sedis	2.10648e-05	0.000172927	6.55208e-05	0	0	1.26563e-05	0	0	0	0
0.1.59.5.1.1	Bacteria;WCHB1-60;uncultured_Clostridium_sp.;unclassified;unclassified	2.10648e-05	1.92141e-05	2.18403e-05	0	2.80564e-05	3.79689e-05	0	0	1.08752e-05	6.19709e-05
0.1.23.3.1.1	Bacteria;Chlorobi;unclassified;unclassified;unclassified	1.94445e-05	0	2.18403e-05	0	0	0.00010125	0	1.86059e-05	0	1.23942e-05
0.1.26.4.2.4	Bacteria;Cyanobacteria;Melainabacteria;Gastranaerophilales;unclassified	1.94445e-05	1.92141e-05	0	0	9.81974e-05	1.26563e-05	1.35448e-05	9.30293e-06	0	1.23942e-05
0.1.26.4.2.7	Bacteria;Cyanobacteria;Melainabacteria;Gastranaerophilales;uncultured_bacterium	1.94445e-05	5.76424e-05	6.55208e-05	0	1.40282e-05	1.26563e-05	0	1.86059e-05	1.08752e-05	1.23942e-05
0.1.44.7.19.1	Bacteria;Planctomycetes;Phycisphaerae;unclassified;unclassified	1.94445e-05	5.76424e-05	6.55208e-05	0	1.40282e-05	1.26563e-05	0	9.30293e-06	0	3.71826e-05
0.1.44.14.8.1	Bacteria;Planctomycetes;vadinHA49;uncultured_bacterium;unclassified	1.94445e-05	9.60707e-05	0.000131042	0	0	1.26563e-05	0	0	0	0
0.1.45.4.6.10	Bacteria;Proteobacteria;Alphaproteobacteria;DB1-14;uncultured_eubacterium_WD2107	1.94445e-05	9.60707e-05	0.000109201	0	0	0	0	0	2.17505e-05	0
0.1.45.4.16.13	Bacteria;Proteobacteria;Alphaproteobacteria;Rickettsiales;SM1B06	1.94445e-05	0	4.36805e-05	0	7.0141e-05	1.26563e-05	0	0	3.26257e-05	1.23942e-05
0.1.45.6.3.1	Bacteria;Proteobacteria;Betaproteobacteria;B1-7BS;unclassified	1.94445e-05	5.76424e-05	0.000131042	0	0	2.53126e-05	0	0	0	1.23942e-05
0.1.45.6.16.16	Bacteria;Proteobacteria;Betaproteobacteria;TRA3-20;uncultured_bacterium	1.94445e-05	0	0	0	2.80564e-05	2.53126e-05	1.35448e-05	9.30293e-06	3.26257e-05	3.71826e-05
0.1.45.7.13.12	Bacteria;Proteobacteria;Deltaproteobacteria;GR-WP33-30;uncultured_Gemmatimonadetes_bacterium	1.94445e-05	1.92141e-05	2.18403e-05	0	2.80564e-05	3.79689e-05	0	0	0	6.19709e-05
0.1.45.7.13.25	Bacteria;Proteobacteria;Deltaproteobacteria;GR-WP33-30;uncultured_proteobacterium	1.94445e-05	1.92141e-05	0.000196562	0	0	1.26563e-05	1.35448e-05	0	0	0
0.1.45.11.51.6	Bacteria;Proteobacteria;Gammaproteobacteria;Thiotrichales;H2-104-2	1.94445e-05	0.000153713	2.18403e-05	0	2.80564e-05	1.26563e-05	0	0	0	0
0.1.51.1.14.5	Bacteria;Spirochaetae;Spirochaetes;Spirochaetales;PL-11B10	1.94445e-05	1.92141e-05	0	0	7.0141e-05	7.59378e-05	0	0	0	0
0.1.2.11.4.1	Bacteria;Actinobacteria;Thermoleophilia;unclassified;unclassified	1.78241e-05	7.68566e-05	6.55208e-05	0	2.80564e-05	1.26563e-05	0	0	0	1.23942e-05
0.1.7.12.6.1	Bacteria;Bacteroidetes;SM1A07;uncultured_bacterium;unclassified	1.78241e-05	0	0	0.000398512	1.40282e-05	1.26563e-05	0	2.79088e-05	0	0
0.1.18.6.1.1	Bacteria;Candidate_division_SR1;unclassified;unclassified;unclassified	1.78241e-05	3.84283e-05	4.36805e-05	0	1.40282e-05	0	0	0	3.26257e-05	3.71826e-05
0.1.22.1.1.2	Bacteria;Chlamydiae;Chlamydiae;Chlamydiales;Chlamydiales_Incertae_Sedis	1.78241e-05	0.000115285	0.000109201	0	0	0	0	0	0	0
0.1.24.5.2.5	Bacteria;Chloroflexi;Chloroflexia;Chloroflexales;Roseiflexaceae	1.78241e-05	5.76424e-05	0.000152882	0	0	0	0	0	0	1.23942e-05
0.1.24.17.15.1	Bacteria;Chloroflexi;SAR202_clade;uncultured_bacterium;unclassified	1.78241e-05	0.000134499	6.55208e-05	0	0	0	0	9.30293e-06	0	0
0.1.32.1.2.11	Bacteria;Firmicutes;Bacilli;Bacillales;Staphylococcaceae	1.78241e-05	0	8.7361e-05	0	0	2.53126e-05	0	1.86059e-05	2.17505e-05	1.23942e-05
0.1.40.16.4.1	Bacteria;Lentisphaerae;Oligosphaeria;unclassified;unclassified	1.78241e-05	7.68566e-05	8.7361e-05	0	1.40282e-05	2.53126e-05	0	0	0	0
0.1.44.12.2.1	Bacteria;Planctomycetes;SPG12-401-411-B72;uncultured_bacterium;unclassified	1.78241e-05	5.76424e-05	6.55208e-05	0	0	6.32815e-05	0	0	0	0
0.1.45.4.13.1	Bacteria;Proteobacteria;Alphaproteobacteria;Rhizobiales;1174-901-12	1.78241e-05	7.68566e-05	0.000109201	0	0	0	1.35448e-05	0	1.08752e-05	0
0.1.45.7.18.21	Bacteria;Proteobacteria;Deltaproteobacteria;Sh765B-TzT-29;uncultured_delta_proteobacterium	1.78241e-05	3.84283e-05	0.000131042	0	4.20846e-05	0	0	0	0	0
0.1.45.9.1.2	Bacteria;Proteobacteria;Epsilonproteobacteria;BG.g7;uncultured_Arcobacter_sp.	1.78241e-05	0	0	0	0	1.26563e-05	0	0	3.26257e-05	8.67593e-05
0.1.45.11.29.4	Bacteria;Proteobacteria;Gammaproteobacteria;KI89A_clade;uncultured_bacterium	1.78241e-05	5.76424e-05	4.36805e-05	0	1.40282e-05	6.32815e-05	0	0	0	0
0.1.45.11.34.11	Bacteria;Proteobacteria;Gammaproteobacteria;NKB5;uncultured_marine_bacterium	1.78241e-05	7.68566e-05	6.55208e-05	0	1.40282e-05	1.26563e-05	0	0	1.08752e-05	1.23942e-05
0.1.45.11.36.39	Bacteria;Proteobacteria;Gammaproteobacteria;Oceanospirillales;unclassified	1.78241e-05	3.84283e-05	0	6.64187e-05	0	7.59378e-05	0	1.86059e-05	0	0
0.1.58.8.1.4	Bacteria;Verrucomicrobia;Verrucomicrobiae;Verrucomicrobiales;Rubritaleaceae	1.78241e-05	0.000134499	8.7361e-05	0	0	0	0	0	0	0
0.1.59.7.1.1	Bacteria;WCHB1-60;uncultured_bacterium;unclassified;unclassified	1.78241e-05	7.68566e-05	4.36805e-05	6.64187e-05	0	0	0	0	1.08752e-05	3.71826e-05
0.1.1.1.20.21	Bacteria;Acidobacteria;Acidobacteria;Subgroup_6;uncultured_Acidobacteriales_bacterium	1.62037e-05	3.84283e-05	0.000174722	0	0	0	0	0	0	0
0.1.1.2.7.6	Bacteria;Acidobacteria;Holophagae;Subgroup_10;unclassified	1.62037e-05	3.84283e-05	0.000109201	0	0	1.26563e-05	0	0	0	2.47884e-05
0.1.2.11.2.9	Bacteria;Actinobacteria;Thermoleophilia;Solirubrobacterales;Patulibacteraceae	1.62037e-05	7.68566e-05	0.000131042	0	0	0	0	0	0	0
0.1.2.11.2.15	Bacteria;Actinobacteria;Thermoleophilia;Solirubrobacterales;unclassified	1.62037e-05	3.84283e-05	0.000109201	0	0	1.26563e-05	0	0	0	2.47884e-05
0.1.4.1.1.6	Bacteria;Armatimonadetes;Armatimonadia;Armatimonadales;uncultured_bacterium	1.62037e-05	1.92141e-05	4.36805e-05	0	0	2.53126e-05	0	2.79088e-05	1.08752e-05	1.23942e-05
0.1.4.2.1.7	Bacteria;Armatimonadetes;Chthonomonadetes;Chthonomonadales;uncultured_bacterium	1.62037e-05	0.000115285	4.36805e-05	0	0	1.26563e-05	0	0	0	1.23942e-05
0.1.7.5.5.1	Bacteria;Bacteroidetes;Cytophagia;unclassified;unclassified	1.62037e-05	5.76424e-05	6.55208e-05	0	1.40282e-05	0	0	0	2.17505e-05	1.23942e-05
0.1.7.17.3.1	Bacteria;Bacteroidetes;vadinHA17;unclassified;unclassified	1.62037e-05	0	2.18403e-05	0	1.40282e-05	0	0	5.58176e-05	2.17505e-05	0
0.1.13.6.1.1	Bacteria;Candidate_division_OD1;Unknown_Class;Unknown_Order;Unknown_Family	1.62037e-05	0	0	0	0	0	0	9.30293e-05	0	0
0.1.15.16.1.1	Bacteria;Candidate_division_OP3;uncultured_prokaryote;unclassified;unclassified	1.62037e-05	9.60707e-05	8.7361e-05	0	1.40282e-05	0	0	0	0	0
0.1.19.42.1.1	Bacteria;Candidate_division_TM7;uncultured_soil_bacterium;unclassified;unclassified	1.62037e-05	5.76424e-05	6.55208e-05	0	0	0	0	0	2.17505e-05	2.47884e-05
0.1.24.16.1.1	Bacteria;Chloroflexi;S085;unclassified;unclassified	1.62037e-05	1.92141e-05	6.55208e-05	0	0	0	0	0	4.3501e-05	2.47884e-05
0.1.26.2.8.1	Bacteria;Cyanobacteria;Cyanobacteria;SubsectionIV;FamilyI	1.62037e-05	0.000115285	2.18403e-05	0	0	0	4.06344e-05	0	0	0
0.1.32.1.5.5	Bacteria;Firmicutes;Bacilli;Lactobacillales;Lactobacillaceae	1.62037e-05	9.60707e-05	0.000109201	0	0	0	0	0	0	0
0.1.40.23.6.1	Bacteria;Lentisphaerae;WCHB1-41;uncultured_bacterium;unclassified	1.62037e-05	5.76424e-05	6.55208e-05	0	1.40282e-05	1.26563e-05	0	0	2.17505e-05	0
0.1.42.1.1.2	Bacteria;Nitrospirae;Nitrospira;Nitrospirales;4-29	1.62037e-05	9.60707e-05	8.7361e-05	0	0	0	0	9.30293e-06	0	0
0.1.41.13.1.1	Bacteria;NPL-UPA2;uncultured_planctomycete;unclassified;unclassified	1.62037e-05	0.000115285	4.36805e-05	0	0	2.53126e-05	0	0	0	0
0.1.45.4.16.3	Bacteria;Proteobacteria;Alphaproteobacteria;Rickettsiales;EF100-94H03	1.62037e-05	1.92141e-05	0.000109201	0	2.80564e-05	2.53126e-05	0	0	0	0
0.1.45.4.21.6	Bacteria;Proteobacteria;Alphaproteobacteria;Sphingomonadales;DSSF69	1.62037e-05	0	0	0	4.20846e-05	7.59378e-05	0	0	0	1.23942e-05
0.1.45.7.13.9	Bacteria;Proteobacteria;Deltaproteobacteria;GR-WP33-30;uncultured_Desulfuromonadales_bacterium	1.62037e-05	1.92141e-05	6.55208e-05	0	1.40282e-05	1.26563e-05	0	0	1.08752e-05	3.71826e-05
0.1.45.7.13.10	Bacteria;Proteobacteria;Deltaproteobacteria;GR-WP33-30;uncultured_Desulfuromonas_sp.	1.62037e-05	7.68566e-05	0.000109201	0	0	0	0	0	0	1.23942e-05
0.1.45.11.24.1	Bacteria;Proteobacteria;Gammaproteobacteria;Gammaproteobacteria_Incertae_Sedis;Unknown_Family	1.62037e-05	0.000115285	2.18403e-05	0	1.40282e-05	2.53126e-05	0	0	0	0
0.1.58.8.1.7	Bacteria;Verrucomicrobia;Verrucomicrobiae;Verrucomicrobiales;uncultured_bacterium	1.62037e-05	0	2.18403e-05	0	1.40282e-05	1.26563e-05	0	0	4.3501e-05	3.71826e-05
0.1.59.4.1.1	Bacteria;WCHB1-60;uncultured_Clostridiales_bacterium;unclassified;unclassified	1.62037e-05	0	2.18403e-05	0	0	1.26563e-05	1.35448e-05	9.30293e-06	2.17505e-05	4.95767e-05
0.1.1.1.10.2	Bacteria;Acidobacteria;Acidobacteria;Subgroup_17;uncultured_Acidobacteria_bacterium	1.45834e-05	1.92141e-05	0.000109201	0	1.40282e-05	1.26563e-05	0	0	0	1.23942e-05
0.1.1.1.13.11	Bacteria;Acidobacteria;Acidobacteria;Subgroup_2;uncultured_bacterium	1.45834e-05	3.84283e-05	0.000131042	6.64187e-05	0	0	0	0	0	0
0.1.1.2.9.3	Bacteria;Acidobacteria;Holophagae;Subgroup_7;unclassified	1.45834e-05	1.92141e-05	0.000152882	0	0	0	0	0	0	1.23942e-05
0.1.2.11.2.3	Bacteria;Actinobacteria;Thermoleophilia;Solirubrobacterales;480-2	1.45834e-05	5.76424e-05	8.7361e-05	0	0	0	1.35448e-05	9.30293e-06	0	0
0.1.7.5.2.1	Bacteria;Bacteroidetes;Cytophagia;Order_II;Rhodothermaceae	1.45834e-05	0	6.55208e-05	6.64187e-05	0	0	6.77241e-05	0	0	0
0.1.26.4.3.5	Bacteria;Cyanobacteria;Melainabacteria;Obscuribacterales;uncultured_actinobacterium	1.45834e-05	3.84283e-05	6.55208e-05	0	0	1.26563e-05	1.35448e-05	1.86059e-05	0	0
0.1.26.4.4.2	Bacteria;Cyanobacteria;Melainabacteria;Vampirovibrionales;marine_metagenome	1.45834e-05	0	0	0	0	0	1.35448e-05	4.65147e-05	1.08752e-05	2.47884e-05
0.1.45.4.13.8	Bacteria;Proteobacteria;Alphaproteobacteria;Rhizobiales;Beijerinckiaceae	1.45834e-05	7.68566e-05	0.000109201	0	0	0	0	0	0	0
0.1.45.4.15.5	Bacteria;Proteobacteria;Alphaproteobacteria;Rhodospirillales;CCU22	1.45834e-05	0.000115285	6.55208e-05	0	0	0	0	0	0	0
0.1.45.4.16.22	Bacteria;Proteobacteria;Alphaproteobacteria;Rickettsiales;uncultured_bacterium	1.45834e-05	0	0	0	7.0141e-05	3.79689e-05	0	0	0	1.23942e-05
0.1.45.11.3.3	Bacteria;Proteobacteria;Gammaproteobacteria;34P16;unclassified	1.45834e-05	9.60707e-05	8.7361e-05	0	0	0	0	0	0	0
0.1.58.4.5.1	Bacteria;Verrucomicrobia;S-BQ2-57_soil_group;uncultured_bacterium;unclassified	1.45834e-05	3.84283e-05	4.36805e-05	0	1.40282e-05	3.79689e-05	0	0	1.08752e-05	0
0.1.1.1.18.6	Bacteria;Acidobacteria;Acidobacteria;Subgroup_4;unclassified	1.2963e-05	5.76424e-05	6.55208e-05	0	1.40282e-05	0	0	0	0	1.23942e-05
0.1.2.2.13.8	Bacteria;Actinobacteria;Actinobacteria;PeM15;uncultured_actinobacterium	1.2963e-05	5.76424e-05	4.36805e-05	0	1.40282e-05	0	0	0	1.08752e-05	1.23942e-05
0.1.7.4.1.16	Bacteria;Bacteroidetes;Bacteroidia;Bacteroidales;PL-11B8_wastewater-sludge_group	1.2963e-05	3.84283e-05	4.36805e-05	0	2.80564e-05	0	0	0	1.08752e-05	1.23942e-05
0.1.10.16.1.1	Bacteria;Candidate_division_BRC1;uncultured_gamma_proteobacterium;unclassified;unclassified	1.2963e-05	1.92141e-05	4.36805e-05	0	1.40282e-05	5.06252e-05	0	0	0	0
0.1.13.28.1.1	Bacteria;Candidate_division_OD1;uncultured_soil_bacterium;unclassified;unclassified	1.2963e-05	7.68566e-05	0	0	1.40282e-05	0	0	0	2.17505e-05	1.23942e-05
0.1.15.2.1.1	Bacteria;Candidate_division_OP3;mixed_culture_isolate_koll11;unclassified;unclassified	1.2963e-05	9.60707e-05	2.18403e-05	0	0	1.26563e-05	0	9.30293e-06	0	0
0.1.32.2.2.27	Bacteria;Firmicutes;Clostridia;Clostridiales;Peptostreptococcaceae	1.2963e-05	5.76424e-05	4.36805e-05	0	0	1.26563e-05	0	0	0	2.47884e-05
0.1.41.12.1.1	Bacteria;NPL-UPA2;uncultured_organism;unclassified;unclassified	1.2963e-05	0	2.18403e-05	0	4.20846e-05	0	2.70896e-05	9.30293e-06	0	1.23942e-05
0.1.44.14.12.1	Bacteria;Planctomycetes;vadinHA49;uncultured_planctomycete;unclassified	1.2963e-05	1.92141e-05	0.000109201	0	1.40282e-05	0	0	0	0	1.23942e-05
0.1.45.4.6.4	Bacteria;Proteobacteria;Alphaproteobacteria;DB1-14;marine_metagenome	1.2963e-05	0	0	0	0	0	2.70896e-05	1.86059e-05	1.08752e-05	3.71826e-05
0.1.45.4.13.35	Bacteria;Proteobacteria;Alphaproteobacteria;Rhizobiales;alphaI_cluster	1.2963e-05	1.92141e-05	6.55208e-05	0	0	1.26563e-05	0	0	0	3.71826e-05
0.1.45.4.15.6	Bacteria;Proteobacteria;Alphaproteobacteria;Rhodospirillales;DA111	1.2963e-05	3.84283e-05	6.55208e-05	0	0	0	1.35448e-05	0	0	2.47884e-05
0.1.45.4.21.10	Bacteria;Proteobacteria;Alphaproteobacteria;Sphingomonadales;M05-Pitesti	1.2963e-05	5.76424e-05	4.36805e-05	0	1.40282e-05	1.26563e-05	0	9.30293e-06	0	0
0.1.45.7.8.1	Bacteria;Proteobacteria;Deltaproteobacteria;Desulfobacterales;Desulfobacteraceae	1.2963e-05	3.84283e-05	2.18403e-05	0	0	2.53126e-05	0	0	3.26257e-05	0
0.1.45.7.14.15	Bacteria;Proteobacteria;Deltaproteobacteria;Myxococcales;VHS-B3-70	1.2963e-05	5.76424e-05	8.7361e-05	0	0	1.26563e-05	0	0	0	0
0.1.45.11.51.10	Bacteria;Proteobacteria;Gammaproteobacteria;Thiotrichales;unclassified	1.2963e-05	3.84283e-05	6.55208e-05	0	0	3.79689e-05	0	0	0	0
0.1.45.20.4.1	Bacteria;Proteobacteria;TA18;uncultured_Bradyrhizobiaceae_bacterium;unclassified	1.2963e-05	0.000153713	0	0	0	0	0	0	0	0
0.1.51.1.18.1	Bacteria;Spirochaetae;Spirochaetes;unclassified;unclassified	1.2963e-05	0	0	0	1.40282e-05	0	2.70896e-05	4.65147e-05	0	0
0.1.55.1.6.3	Bacteria;Tenericutes;Mollicutes;Entomoplasmatales;Spiroplasmataceae	1.2963e-05	9.60707e-05	4.36805e-05	0	0	1.26563e-05	0	0	0	0
0.1.58.2.34.1	Bacteria;Verrucomicrobia;OPB35_soil_group;uncultured_soil_bacterium;unclassified	1.2963e-05	0	0.000152882	0	0	1.26563e-05	0	0	0	0
0.1.58.8.1.6	Bacteria;Verrucomicrobia;Verrucomicrobiae;Verrucomicrobiales;unclassified	1.2963e-05	0	0.000109201	0	1.40282e-05	0	0	0	0	2.47884e-05
0.1.1.1.2.1	Bacteria;Acidobacteria;Acidobacteria;AT-s3-28;unclassified	1.13426e-05	0	0.000131042	0	0	1.26563e-05	0	0	0	0
0.1.1.1.2.6	Bacteria;Acidobacteria;Acidobacteria;AT-s3-28;uncultured_bacterium	1.13426e-05	3.84283e-05	6.55208e-05	0	1.40282e-05	0	0	0	0	1.23942e-05
0.1.1.1.6.1	Bacteria;Acidobacteria;Acidobacteria;Subgroup_11;unclassified	1.13426e-05	3.84283e-05	4.36805e-05	0	1.40282e-05	2.53126e-05	0	0	0	0
0.1.1.1.17.4	Bacteria;Acidobacteria;Acidobacteria;Subgroup_3;Elev-16S-1166	1.13426e-05	3.84283e-05	0	6.64187e-05	0	3.79689e-05	0	0	1.08752e-05	0
0.1.1.1.20.51	Bacteria;Acidobacteria;Acidobacteria;Subgroup_6;uncultured_bacterium_gp6	1.13426e-05	5.76424e-05	0	0	0	1.26563e-05	0	0	0	3.71826e-05
0.1.2.2.8.2	Bacteria;Actinobacteria;Actinobacteria;Frankiales;Cryptosporangiaceae	1.13426e-05	3.84283e-05	2.18403e-05	0	0	0	1.35448e-05	0	1.08752e-05	2.47884e-05
0.1.2.2.8.7	Bacteria;Actinobacteria;Actinobacteria;Frankiales;unclassified	1.13426e-05	5.76424e-05	6.55208e-05	0	0	0	0	0	1.08752e-05	0
0.1.15.1.1.1	Bacteria;Candidate_division_OP3;Omnitrophica_clone_OPB2;unclassified;unclassified	1.13426e-05	0	0	0	0	0	0	6.51205e-05	0	0
0.1.20.7.1.1	Bacteria;Candidate_division_WS3;uncultured_Acidobacteria_bacterium;unclassified;unclassified	1.13426e-05	5.76424e-05	2.18403e-05	0	1.40282e-05	1.26563e-05	0	0	0	1.23942e-05
0.1.20.10.1.1	Bacteria;Candidate_division_WS3;uncultured_Fibrobacteres_bacterium;unclassified;unclassified	1.13426e-05	5.76424e-05	6.55208e-05	0	1.40282e-05	0	0	0	0	0
0.1.24.2.3.1	Bacteria;Chloroflexi;Ardenticatenia;uncultured;unclassified	1.13426e-05	0.000115285	2.18403e-05	0	0	0	0	0	0	0
0.1.24.9.5.1	Bacteria;Chloroflexi;JG30-KF-CM66;uncultured_Chloroflexi_bacterium;unclassified	1.13426e-05	0	2.18403e-05	0	5.61128e-05	0	0	9.30293e-06	1.08752e-05	0
0.1.32.1.5.6	Bacteria;Firmicutes;Bacilli;Lactobacillales;Leuconostocaceae	1.13426e-05	1.92141e-05	2.18403e-05	0	2.80564e-05	1.26563e-05	0	0	1.08752e-05	1.23942e-05
0.1.40.15.3.1	Bacteria;Lentisphaerae;MSBL3;uncultured_bacterium;unclassified	1.13426e-05	1.92141e-05	0	0	2.80564e-05	3.79689e-05	1.35448e-05	0	0	0
0.1.44.7.18.1	Bacteria;Planctomycetes;Phycisphaerae;mle1-8;unclassified	1.13426e-05	0	0	0	2.80564e-05	0	0	0	2.17505e-05	3.71826e-05
0.1.45.4.5.3	Bacteria;Proteobacteria;Alphaproteobacteria;Caulobacterales;unclassified	1.13426e-05	1.92141e-05	0	0	0	2.53126e-05	0	2.79088e-05	0	1.23942e-05
0.1.45.4.13.20	Bacteria;Proteobacteria;Alphaproteobacteria;Rhizobiales;JG34-KF-361	1.13426e-05	7.68566e-05	4.36805e-05	0	0	0	0	0	0	1.23942e-05
0.1.58.2.37.1	Bacteria;Verrucomicrobia;OPB35_soil_group;uncultured_verrucomicrobium_DEV020;unclassified	1.13426e-05	5.76424e-05	6.55208e-05	0	0	1.26563e-05	0	0	0	0
0.1.58.3.13.2	Bacteria;Verrucomicrobia;Opitutae;vadinHA64;unclassified	1.13426e-05	1.92141e-05	4.36805e-05	0	1.40282e-05	2.53126e-05	0	0	1.08752e-05	0
0.1.59.6.1.1	Bacteria;WCHB1-60;uncultured_Spirochaetes_bacterium;unclassified;unclassified	1.13426e-05	0	0	6.64187e-05	2.80564e-05	2.53126e-05	1.35448e-05	9.30293e-06	0	0
0.1.1.1.6.2	Bacteria;Acidobacteria;Acidobacteria;Subgroup_11;uncultured_Acidobacteria_bacterium	9.72224e-06	5.76424e-05	6.55208e-05	0	0	0	0	0	0	0
0.1.1.1.13.5	Bacteria;Acidobacteria;Acidobacteria;Subgroup_2;unclassified	9.72224e-06	1.92141e-05	8.7361e-05	0	0	0	0	9.30293e-06	0	0
0.1.1.2.1.1	Bacteria;Acidobacteria;Holophagae;Acanthopleuribacterales;Acanthopleuribacteraceae	9.72224e-06	5.76424e-05	6.55208e-05	0	0	0	0	0	0	0
0.1.2.1.1.2	Bacteria;Actinobacteria;Acidimicrobiia;Acidimicrobiales;Acidimicrobiales_Incertae_Sedis	9.72224e-06	0	0	0	0	2.53126e-05	1.35448e-05	0	2.17505e-05	1.23942e-05
0.1.2.2.6.4	Bacteria;Actinobacteria;Actinobacteria;Corynebacteriales;Mycobacteriaceae	9.72224e-06	7.68566e-05	2.18403e-05	0	0	0	1.35448e-05	0	0	0
0.1.2.11.1.2	Bacteria;Actinobacteria;Thermoleophilia;Gaiellales;unclassified	9.72224e-06	1.92141e-05	8.7361e-05	0	0	0	0	0	1.08752e-05	0
0.1.14.14.1.1	Bacteria;Candidate_division_OP11;uncultured_anaerobic_bacterium;unclassified;unclassified	9.72224e-06	0	0	0	0	3.79689e-05	0	0	1.08752e-05	2.47884e-05
0.1.15.8.1.1	Bacteria;Candidate_division_OP3;uncultured_Omnitrophica_bacterium;unclassified;unclassified	9.72224e-06	3.84283e-05	8.7361e-05	0	0	0	0	0	0	0
0.1.24.9.1.1	Bacteria;Chloroflexi;JG30-KF-CM66;unclassified;unclassified	9.72224e-06	0	0	0	0	1.26563e-05	0	0	2.17505e-05	3.71826e-05
0.1.24.16.4.1	Bacteria;Chloroflexi;S085;uncultured_bacterium;unclassified	9.72224e-06	3.84283e-05	2.18403e-05	0	1.40282e-05	0	0	0	0	2.47884e-05
0.1.24.20.6.1	Bacteria;Chloroflexi;TK10;uncultured_Chloroflexus_sp.;unclassified	9.72224e-06	5.76424e-05	4.36805e-05	0	0	0	0	0	1.08752e-05	0
0.1.24.23.25.1	Bacteria;Chloroflexi;uncultured;uncultured_sludge_bacterium_A31;unclassified	9.72224e-06	3.84283e-05	8.7361e-05	0	0	0	0	0	0	0
0.1.8.2.1.1	Bacteria;CKC4;uncultured_Firmicutes_bacterium;unclassified;unclassified	9.72224e-06	0	0	0	4.20846e-05	1.26563e-05	0	0	2.17505e-05	0
0.1.26.3.10.1	Bacteria;Cyanobacteria;ML635J-21;uncultured_cyanobacterium;unclassified	9.72224e-06	1.92141e-05	6.55208e-05	0	0	1.26563e-05	0	0	1.08752e-05	0
0.1.31.1.1.14	Bacteria;Fibrobacteres;Fibrobacteria;Fibrobacterales;unclassified	9.72224e-06	0	2.18403e-05	0.000199256	0	2.53126e-05	0	0	0	0
0.1.36.1.2.22	Bacteria;Gemmatimonadetes;Gemmatimonadetes;BD2-11_terrestrial_group;uncultured_soil_bacterium	9.72224e-06	0	8.7361e-05	0	1.40282e-05	1.26563e-05	0	0	0	0
0.1.44.9.3.1	Bacteria;Planctomycetes;Pla4_lineage;uncultured_Planctomycetales_bacterium;unclassified	9.72224e-06	5.76424e-05	6.55208e-05	0	0	0	0	0	0	0
0.1.45.6.15.20	Bacteria;Proteobacteria;Betaproteobacteria;SC-I-84;uncultured_bacterium	9.72224e-06	7.68566e-05	4.36805e-05	0	0	0	0	0	0	0
0.1.45.6.16.20	Bacteria;Proteobacteria;Betaproteobacteria;TRA3-20;uncultured_gamma_proteobacterium	9.72224e-06	1.92141e-05	0	0	2.80564e-05	2.53126e-05	0	0	0	1.23942e-05
0.1.45.11.5.5	Bacteria;Proteobacteria;Gammaproteobacteria;Aeromonadales;unclassified	9.72224e-06	0	0	0	0	0	0	0	4.3501e-05	2.47884e-05
0.1.45.11.33.5	Bacteria;Proteobacteria;Gammaproteobacteria;Methylococcales;IheB2-23	9.72224e-06	5.76424e-05	4.36805e-05	0	0	0	1.35448e-05	0	0	0
0.1.45.20.22.1	Bacteria;Proteobacteria;TA18;uncultured_soil_bacterium;unclassified	9.72224e-06	0	0	0	4.20846e-05	3.79689e-05	0	0	0	0
0.1.58.3.13.5	Bacteria;Verrucomicrobia;Opitutae;vadinHA64;uncultured_Verrucomicrobia_bacterium	9.72224e-06	0	0	0	1.40282e-05	5.06252e-05	0	0	1.08752e-05	0
0.1.1.1.17.6	Bacteria;Acidobacteria;Acidobacteria;Subgroup_3;PAUC26f	8.10186e-06	7.68566e-05	2.18403e-05	0	0	0	0	0	0	0
0.1.1.1.23.1	Bacteria;Acidobacteria;Acidobacteria;unclassified;unclassified	8.10186e-06	5.76424e-05	2.18403e-05	0	1.40282e-05	0	0	0	0	0
0.1.2.1.1.3	Bacteria;Actinobacteria;Acidimicrobiia;Acidimicrobiales;Iamiaceae	8.10186e-06	3.84283e-05	6.55208e-05	0	0	0	0	0	0	0
0.1.2.2.6.5	Bacteria;Actinobacteria;Actinobacteria;Corynebacteriales;Nocardiaceae	8.10186e-06	3.84283e-05	6.55208e-05	0	0	0	0	0	0	0
0.1.2.9.1.1	Bacteria;Actinobacteria;Rubrobacteria;Rubrobacterales;Rubrobacteriaceae	8.10186e-06	3.84283e-05	6.55208e-05	0	0	0	0	0	0	0
0.1.7.9.19.1	Bacteria;Bacteroidetes;SB-1;uncultured_soil_bacterium;unclassified	8.10186e-06	0	0	0	1.40282e-05	3.79689e-05	0	0	1.08752e-05	0
0.1.7.13.1.16	Bacteria;Bacteroidetes;Sphingobacteriia;Sphingobacteriales;ST-12K33	8.10186e-06	0	0	0	0	0	0	0	4.3501e-05	1.23942e-05
0.1.20.13.1.1	Bacteria;Candidate_division_WS3;uncultured_Pelobacter_sp.;unclassified;unclassified	8.10186e-06	3.84283e-05	2.18403e-05	0	0	1.26563e-05	0	0	1.08752e-05	0
0.1.24.21.2.7	Bacteria;Chloroflexi;Thermomicrobia;JG30-KF-CM45;uncultured_bacterium	8.10186e-06	3.84283e-05	4.36805e-05	0	0	0	0	0	0	1.23942e-05
0.1.30.1.1.3	Bacteria;Elusimicrobia;Elusimicrobia;12-31;uncultured_bacterium	8.10186e-06	0	0	0	0	0	0	4.65147e-05	0	0
0.1.30.1.7.8	Bacteria;Elusimicrobia;Elusimicrobia;Lineage_IV;uncultured_microorganism	8.10186e-06	0	0	0	4.20846e-05	2.53126e-05	0	0	0	0
0.1.36.1.1.1	Bacteria;Gemmatimonadetes;Gemmatimonadetes;AT425-EubC11_terrestrial_group;unclassified	8.10186e-06	1.92141e-05	6.55208e-05	6.64187e-05	0	0	0	0	0	0
0.1.40.17.3.1	Bacteria;Lentisphaerae;PBS-III-20;uncultured_bacterium;unclassified	8.10186e-06	5.76424e-05	4.36805e-05	0	0	0	0	0	0	0
0.1.40.17.7.1	Bacteria;Lentisphaerae;PBS-III-20;uncultured_verrucomicrobium_DEV045;unclassified	8.10186e-06	1.92141e-05	8.7361e-05	0	0	0	0	0	0	0
0.1.41.14.1.1	Bacteria;NPL-UPA2;uncultured_prokaryote;unclassified;unclassified	8.10186e-06	3.84283e-05	0	0	0	3.79689e-05	0	0	0	0
0.1.44.1.1.1	Bacteria;Planctomycetes;028H05-P-BN-P5;unclassified;unclassified	8.10186e-06	3.84283e-05	6.55208e-05	0	0	0	0	0	0	0
0.1.44.2.2.1	Bacteria;Planctomycetes;BD7-11;uncultured_Planctomycetaceae_bacterium;unclassified	8.10186e-06	5.76424e-05	4.36805e-05	0	0	0	0	0	0	0
0.1.44.9.7.1	Bacteria;Planctomycetes;Pla4_lineage;uncultured_planctomycete;unclassified	8.10186e-06	3.84283e-05	4.36805e-05	0	0	1.26563e-05	0	0	0	0
0.1.44.9.8.1	Bacteria;Planctomycetes;Pla4_lineage;uncultured_prokaryote;unclassified	8.10186e-06	5.76424e-05	4.36805e-05	0	0	0	0	0	0	0
0.1.45.4.15.12	Bacteria;Proteobacteria;Alphaproteobacteria;Rhodospirillales;MND8	8.10186e-06	7.68566e-05	2.18403e-05	0	0	0	0	0	0	0
0.1.45.6.3.6	Bacteria;Proteobacteria;Betaproteobacteria;B1-7BS;uncultured_soil_bacterium	8.10186e-06	1.92141e-05	4.36805e-05	0	1.40282e-05	0	0	0	0	1.23942e-05
0.1.45.6.16.14	Bacteria;Proteobacteria;Betaproteobacteria;TRA3-20;uncultured_Rhodocyclaceae_bacterium	8.10186e-06	3.84283e-05	2.18403e-05	0	0	2.53126e-05	0	0	0	0
0.1.45.8.6.1	Bacteria;Proteobacteria;Elev-16S-509;uncultured_proteobacterium;unclassified	8.10186e-06	1.92141e-05	0	0	1.40282e-05	1.26563e-05	0	0	2.17505e-05	0
0.1.58.2.40.1	Bacteria;Verrucomicrobia;OPB35_soil_group;uncultured_verrucomicrobium_DEV114;unclassified	8.10186e-06	5.76424e-05	4.36805e-05	0	0	0	0	0	0	0
0.1.1.1.10.4	Bacteria;Acidobacteria;Acidobacteria;Subgroup_17;uncultured_Acidobacteriales_bacterium	6.48149e-06	3.84283e-05	4.36805e-05	0	0	0	0	0	0	0
0.1.1.1.16.3	Bacteria;Acidobacteria;Acidobacteria;Subgroup_25;uncultured_bacterium	6.48149e-06	5.76424e-05	2.18403e-05	0	0	0	0	0	0	0
0.1.2.2.11.8	Bacteria;Actinobacteria;Actinobacteria;Micrococcales;Demequinaceae	6.48149e-06	1.92141e-05	6.55208e-05	0	0	0	0	0	0	0
0.1.2.2.11.23	Bacteria;Actinobacteria;Actinobacteria;Micrococcales;unclassified	6.48149e-06	0	2.18403e-05	0	1.40282e-05	0	0	9.30293e-06	0	1.23942e-05
0.1.2.11.2.1	Bacteria;Actinobacteria;Thermoleophilia;Solirubrobacterales;0319-6M6	6.48149e-06	1.92141e-05	6.55208e-05	0	0	0	0	0	0	0
0.1.2.11.2.14	Bacteria;Actinobacteria;Thermoleophilia;Solirubrobacterales;YNPFFP1	6.48149e-06	7.68566e-05	0	0	0	0	0	0	0	0
0.1.7.4.1.24	Bacteria;Bacteroidetes;Bacteroidia;Bacteroidales;S24-7	6.48149e-06	3.84283e-05	0	0	0	1.26563e-05	0	0	1.08752e-05	0
0.1.7.2.2.1	Bacteria;Bacteroidetes;BSV13;unclassified;unclassified	6.48149e-06	0	2.18403e-05	0	2.80564e-05	0	0	0	1.08752e-05	0
0.1.7.17.23.1	Bacteria;Bacteroidetes;vadinHA17;uncultured_soil_bacterium;unclassified	6.48149e-06	1.92141e-05	0	0	1.40282e-05	1.26563e-05	0	0	1.08752e-05	0
0.1.12.6.1.1	Bacteria;Candidate_division_KB1;unclassified;unclassified;unclassified	6.48149e-06	0	0	0	0	0	1.35448e-05	2.79088e-05	0	0
0.1.24.5.2.1	Bacteria;Chloroflexi;Chloroflexia;Chloroflexales;Chloroflexaceae	6.48149e-06	0	8.7361e-05	0	0	0	0	0	0	0
0.1.24.8.7.1	Bacteria;Chloroflexi;Gitt-GS-136;uncultured_bacterium;unclassified	6.48149e-06	0	4.36805e-05	0	1.40282e-05	1.26563e-05	0	0	0	0
0.1.24.11.2.1	Bacteria;Chloroflexi;KD4-96;unclassified;unclassified	6.48149e-06	1.92141e-05	2.18403e-05	0	0	1.26563e-05	0	9.30293e-06	0	0
0.1.26.4.3.1	Bacteria;Cyanobacteria;Melainabacteria;Obscuribacterales;bioreactor_metagenome	6.48149e-06	3.84283e-05	0	0	1.40282e-05	1.26563e-05	0	0	0	0
0.1.27.1.1.1	Bacteria;Deferribacteres;Deferribacteres;Deferribacterales;Deferribacteraceae	6.48149e-06	0	6.55208e-05	0	1.40282e-05	0	0	0	0	0
0.1.30.1.6.4	Bacteria;Elusimicrobia;Elusimicrobia;Lineage_IIc;uncultured_prokaryote	6.48149e-06	7.68566e-05	0	0	0	0	0	0	0	0
0.1.30.1.7.9	Bacteria;Elusimicrobia;Elusimicrobia;Lineage_IV;uncultured_soil_bacterium	6.48149e-06	1.92141e-05	6.55208e-05	0	0	0	0	0	0	0
0.1.31.1.1.12	Bacteria;Fibrobacteres;Fibrobacteria;Fibrobacterales;possible_family_01	6.48149e-06	0	0	0	1.40282e-05	2.53126e-05	0	9.30293e-06	0	0
0.1.36.1.7.1	Bacteria;Gemmatimonadetes;Gemmatimonadetes;unclassified;unclassified	6.48149e-06	7.68566e-05	0	0	0	0	0	0	0	0
0.1.42.1.1.10	Bacteria;Nitrospirae;Nitrospira;Nitrospirales;unclassified	6.48149e-06	3.84283e-05	4.36805e-05	0	0	0	0	0	0	0
0.1.44.2.7.1	Bacteria;Planctomycetes;BD7-11;uncultured_marine_bacterium;unclassified	6.48149e-06	1.92141e-05	6.55208e-05	0	0	0	0	0	0	0
0.1.44.2.9.1	Bacteria;Planctomycetes;BD7-11;uncultured_planctomycete;unclassified	6.48149e-06	0	0	0	1.40282e-05	2.53126e-05	0	0	0	1.23942e-05
0.1.44.6.12.1	Bacteria;Planctomycetes;OM190;uncultured_planctomycete;unclassified	6.48149e-06	0	4.36805e-05	0	0	2.53126e-05	0	0	0	0
0.1.44.7.6.1	Bacteria;Planctomycetes;Phycisphaerae;CPla-3_termite_group;unclassified	6.48149e-06	0	2.18403e-05	0	1.40282e-05	2.53126e-05	0	0	0	0
0.1.44.7.12.8	Bacteria;Planctomycetes;Phycisphaerae;Phycisphaerales;unclassified	6.48149e-06	0	0	0	0	1.26563e-05	0	2.79088e-05	0	0
0.1.44.11.4.1	Bacteria;Planctomycetes;SGST604;uncultured_planctomycete;unclassified	6.48149e-06	1.92141e-05	2.18403e-05	0	0	2.53126e-05	0	0	0	0
0.1.44.14.6.1	Bacteria;Planctomycetes;vadinHA49;uncultured_Planctomycetaceae_bacterium;unclassified	6.48149e-06	3.84283e-05	4.36805e-05	0	0	0	0	0	0	0
0.1.45.6.16.11	Bacteria;Proteobacteria;Betaproteobacteria;TRA3-20;uncultured_Nitrosomonadaceae_bacterium	6.48149e-06	5.76424e-05	0	0	0	1.26563e-05	0	0	0	0
0.1.45.7.15.2	Bacteria;Proteobacteria;Deltaproteobacteria;Rs-K70_termite_group;uncultured_bacterium	6.48149e-06	0	4.36805e-05	0	0	2.53126e-05	0	0	0	0
0.1.45.11.3.2	Bacteria;Proteobacteria;Gammaproteobacteria;34P16;gamma_proteobacterium_HdN1	6.48149e-06	1.92141e-05	4.36805e-05	0	1.40282e-05	0	0	0	0	0
0.1.45.11.3.1	Bacteria;Proteobacteria;Gammaproteobacteria;34P16;Pseudomonas_sp._MIC_2010	6.48149e-06	0	4.36805e-05	0	1.40282e-05	1.26563e-05	0	0	0	0
0.1.45.11.18.5	Bacteria;Proteobacteria;Gammaproteobacteria;Chromatiales;unclassified	6.48149e-06	1.92141e-05	0	0	0	0	0	0	1.08752e-05	2.47884e-05
0.1.58.2.36.1	Bacteria;Verrucomicrobia;OPB35_soil_group;uncultured_verrucomicrobium_DEV008;unclassified	6.48149e-06	0	2.18403e-05	0	2.80564e-05	0	0	0	0	1.23942e-05
0.1.58.2.39.1	Bacteria;Verrucomicrobia;OPB35_soil_group;uncultured_verrucomicrobium_DEV064;unclassified	6.48149e-06	1.92141e-05	6.55208e-05	0	0	0	0	0	0	0
0.1.59.11.1.1	Bacteria;WCHB1-60;uncultured_soil_bacterium;unclassified;unclassified	6.48149e-06	0	0	0	0	0	0	0	0	4.95767e-05
0.1.1.1.7.3	Bacteria;Acidobacteria;Acidobacteria;Subgroup_12;uncultured_bacterium	4.86112e-06	0	6.55208e-05	0	0	0	0	0	0	0
0.1.1.1.8.1	Bacteria;Acidobacteria;Acidobacteria;Subgroup_13;unclassified	4.86112e-06	0	6.55208e-05	0	0	0	0	0	0	0
0.1.1.1.9.1	Bacteria;Acidobacteria;Acidobacteria;Subgroup_15;unclassified	4.86112e-06	0	4.36805e-05	0	0	0	0	0	0	1.23942e-05
0.1.1.1.10.12	Bacteria;Acidobacteria;Acidobacteria;Subgroup_17;uncultured_soil_bacterium	4.86112e-06	0	0	0	2.80564e-05	0	0	9.30293e-06	0	0
0.1.1.2.9.7	Bacteria;Acidobacteria;Holophagae;Subgroup_7;uncultured_Acidobacterium_sp.	4.86112e-06	3.84283e-05	0	0	1.40282e-05	0	0	0	0	0
0.1.2.2.8.5	Bacteria;Actinobacteria;Actinobacteria;Frankiales;Nakamurellaceae	4.86112e-06	3.84283e-05	2.18403e-05	0	0	0	0	0	0	0
0.1.2.6.2.1	Bacteria;Actinobacteria;MB-A2-108;uncultured_Actinomycetales_bacterium;unclassified	4.86112e-06	3.84283e-05	2.18403e-05	0	0	0	0	0	0	0
0.1.2.11.2.13	Bacteria;Actinobacteria;Thermoleophilia;Solirubrobacterales;TM146	4.86112e-06	0	0	0	0	0	0	0	1.08752e-05	2.47884e-05
0.1.4.22.1.1	Bacteria;Armatimonadetes;uncultured_bacterium_GC55;unclassified;unclassified	4.86112e-06	0	0	0	0	0	1.35448e-05	9.30293e-06	0	1.23942e-05
0.1.4.10.1.1	Bacteria;Armatimonadetes;uncultured_Carnobacterium_sp.;unclassified;unclassified	4.86112e-06	0	6.55208e-05	0	0	0	0	0	0	0
0.1.4.16.1.1	Bacteria;Armatimonadetes;uncultured_Tetrasphaera_sp.;unclassified;unclassified	4.86112e-06	0	4.36805e-05	0	1.40282e-05	0	0	0	0	0
0.1.7.3.1.1	Bacteria;Bacteroidetes;Bacteroidetes_Incertae_Sedis;Unknown_Order;Unknown_Family	4.86112e-06	0	4.36805e-05	0	0	0	0	0	0	1.23942e-05
0.1.7.10.2.1	Bacteria;Bacteroidetes;SB-5;unclassified;unclassified	4.86112e-06	0	0	0	0	3.79689e-05	0	0	0	0
0.1.7.15.4.1	Bacteria;Bacteroidetes;WCHB1-32;uncultured_Bacteroidetes_bacterium;unclassified	4.86112e-06	3.84283e-05	2.18403e-05	0	0	0	0	0	0	0
0.1.5.22.1.1	Bacteria;BD1-5;uncultured_candidate_division_GN10_bacterium;unclassified;unclassified	4.86112e-06	1.92141e-05	0	0	0	0	0	0	0	2.47884e-05
0.1.5.17.1.1	Bacteria;BD1-5;uncultured_Microgenomates_bacterium;unclassified;unclassified	4.86112e-06	1.92141e-05	0	0	0	0	0	0	2.17505e-05	0
0.1.14.20.1.1	Bacteria;Candidate_division_OP11;uncultured_eubacterium_WCHB1-56;unclassified;unclassified	4.86112e-06	1.92141e-05	0	0	0	0	0	0	0	2.47884e-05
0.1.23.2.1.4	Bacteria;Chlorobi;Ignavibacteria;Ignavibacteriales;Ignavibacteriaceae	4.86112e-06	0	4.36805e-05	0	0	0	0	0	1.08752e-05	0
0.1.24.2.3.7	Bacteria;Chloroflexi;Ardenticatenia;uncultured;uncultured_bacterium	4.86112e-06	1.92141e-05	4.36805e-05	0	0	0	0	0	0	0
0.1.24.6.1.4	Bacteria;Chloroflexi;Dehalococcoidia;Dehalococcoidales;uncultured	4.86112e-06	0	0	0	1.40282e-05	0	1.35448e-05	0	0	1.23942e-05
0.1.24.16.2.1	Bacteria;Chloroflexi;S085;uncultured_Chloroflexi_bacterium;unclassified	4.86112e-06	1.92141e-05	0	0	1.40282e-05	0	0	0	1.08752e-05	0
0.1.24.21.2.2	Bacteria;Chloroflexi;Thermomicrobia;JG30-KF-CM45;unclassified	4.86112e-06	1.92141e-05	4.36805e-05	0	0	0	0	0	0	0
0.1.24.20.10.1	Bacteria;Chloroflexi;TK10;uncultured_bacterium;unclassified	4.86112e-06	3.84283e-05	0	0	1.40282e-05	0	0	0	0	0
0.1.26.4.2.5	Bacteria;Cyanobacteria;Melainabacteria;Gastranaerophilales;uncultured_Gloeobacter_sp.	4.86112e-06	0	0	0	0	3.79689e-05	0	0	0	0
0.1.27.1.1.2	Bacteria;Deferribacteres;Deferribacteres;Deferribacterales;Deferribacterales_Incertae_Sedis	4.86112e-06	1.92141e-05	4.36805e-05	0	0	0	0	0	0	0
0.1.30.1.3.3	Bacteria;Elusimicrobia;Elusimicrobia;FCPU453;uncultured_bacterium	4.86112e-06	1.92141e-05	4.36805e-05	0	0	0	0	0	0	0
0.1.31.1.1.3	Bacteria;Fibrobacteres;Fibrobacteria;Fibrobacterales;B122	4.86112e-06	0	0	0	1.40282e-05	2.53126e-05	0	0	0	0
0.1.32.2.2.11	Bacteria;Firmicutes;Clostridia;Clostridiales;Family_XI	4.86112e-06	3.84283e-05	0	0	0	1.26563e-05	0	0	0	0
0.1.36.1.6.1	Bacteria;Gemmatimonadetes;Gemmatimonadetes;S0134_terrestrial_group;unclassified	4.86112e-06	0	2.18403e-05	0	0	0	0	9.30293e-06	0	1.23942e-05
0.1.40.23.2.1	Bacteria;Lentisphaerae;WCHB1-41;unclassified;unclassified	4.86112e-06	0	2.18403e-05	0	2.80564e-05	0	0	0	0	0
0.1.42.1.1.4	Bacteria;Nitrospirae;Nitrospira;Nitrospirales;FTL22	4.86112e-06	3.84283e-05	2.18403e-05	0	0	0	0	0	0	0
0.1.42.1.1.9	Bacteria;Nitrospirae;Nitrospira;Nitrospirales;Sh765B-TzT-35	4.86112e-06	0	2.18403e-05	0	0	0	0	1.86059e-05	0	0
0.1.43.2.1.1	Bacteria;OC31;uncultured_bacterium;unclassified;unclassified	4.86112e-06	1.92141e-05	2.18403e-05	0	0	0	0	0	0	1.23942e-05
0.1.44.2.4.1	Bacteria;Planctomycetes;BD7-11;uncultured_Planctomycetia_bacterium;unclassified	4.86112e-06	0	2.18403e-05	0	1.40282e-05	1.26563e-05	0	0	0	0
0.1.44.7.4.1	Bacteria;Planctomycetes;Phycisphaerae;C86;unclassified	4.86112e-06	3.84283e-05	0	0	1.40282e-05	0	0	0	0	0
0.1.44.7.14.1	Bacteria;Planctomycetes;Phycisphaerae;S-70;unclassified	4.86112e-06	0	6.55208e-05	0	0	0	0	0	0	0
0.1.44.8.10.1	Bacteria;Planctomycetes;Pla3_lineage;unidentified_marine_bacterioplankton;unclassified	4.86112e-06	1.92141e-05	4.36805e-05	0	0	0	0	0	0	0
0.1.45.4.15.8	Bacteria;Proteobacteria;Alphaproteobacteria;Rhodospirillales;JG37-AG-20	4.86112e-06	1.92141e-05	4.36805e-05	0	0	0	0	0	0	0
0.1.45.4.21.5	Bacteria;Proteobacteria;Alphaproteobacteria;Sphingomonadales;B48	4.86112e-06	0	0	0	0	0	0	1.86059e-05	1.08752e-05	0
0.1.45.4.21.9	Bacteria;Proteobacteria;Alphaproteobacteria;Sphingomonadales;JG34-KF-161	4.86112e-06	1.92141e-05	2.18403e-05	0	0	0	1.35448e-05	0	0	0
0.1.45.6.5.4	Bacteria;Proteobacteria;Betaproteobacteria;Burkholderiales;CM1G08	4.86112e-06	0	0	0	2.80564e-05	0	0	0	1.08752e-05	0
0.1.45.6.12.3	Bacteria;Proteobacteria;Betaproteobacteria;Nitrosomonadales;unclassified	4.86112e-06	3.84283e-05	0	0	0	0	0	0	0	1.23942e-05
0.1.45.7.4.3	Bacteria;Proteobacteria;Deltaproteobacteria;Bdellovibrionales;unclassified	4.86112e-06	5.76424e-05	0	0	0	0	0	0	0	0
0.1.45.7.13.20	Bacteria;Proteobacteria;Deltaproteobacteria;GR-WP33-30;uncultured_delta_proteobacterium	4.86112e-06	3.84283e-05	2.18403e-05	0	0	0	0	0	0	0
0.1.45.7.13.21	Bacteria;Proteobacteria;Deltaproteobacteria;GR-WP33-30;uncultured_marine_bacterium	4.86112e-06	1.92141e-05	2.18403e-05	0	1.40282e-05	0	0	0	0	0
0.1.45.7.14.9	Bacteria;Proteobacteria;Deltaproteobacteria;Myxococcales;Myxococcaceae	4.86112e-06	0	6.55208e-05	0	0	0	0	0	0	0
0.1.45.7.18.9	Bacteria;Proteobacteria;Deltaproteobacteria;Sh765B-TzT-29;uncultured_Green_Bay_ferromanganous_micronodule_bacterium_MND4	4.86112e-06	0	2.18403e-05	0	2.80564e-05	0	0	0	0	0
0.1.45.7.19.9	Bacteria;Proteobacteria;Deltaproteobacteria;Sva0485;uncultured_delta_proteobacterium	4.86112e-06	0	0	0	0	0	1.35448e-05	1.86059e-05	0	0
0.1.45.11.12.2	Bacteria;Proteobacteria;Gammaproteobacteria;BD72BR169;uncultured_bacterium	4.86112e-06	1.92141e-05	0	0	0	0	0	0	0	2.47884e-05
0.1.45.11.18.4	Bacteria;Proteobacteria;Gammaproteobacteria;Chromatiales;Halothiobacillaceae	4.86112e-06	0	0	0	0	3.79689e-05	0	0	0	0
0.1.45.11.33.7	Bacteria;Proteobacteria;Gammaproteobacteria;Methylococcales;Marine_Methylotrophic_Group_2	4.86112e-06	0	2.18403e-05	0	0	0	1.35448e-05	0	1.08752e-05	0
0.1.45.11.34.10	Bacteria;Proteobacteria;Gammaproteobacteria;NKB5;uncultured_gamma_proteobacterium	4.86112e-06	1.92141e-05	4.36805e-05	0	0	0	0	0	0	0
0.1.45.11.34.6	Bacteria;Proteobacteria;Gammaproteobacteria;NKB5;uncultured_Methylococcaceae_bacterium	4.86112e-06	1.92141e-05	2.18403e-05	0	0	0	0	0	0	1.23942e-05
0.1.45.16.3.1	Bacteria;Proteobacteria;SC3-20;unclassified;unclassified	4.86112e-06	3.84283e-05	2.18403e-05	0	0	0	0	0	0	0
0.1.52.1.1.1	Bacteria;Synergistetes;Synergistia;Synergistales;Synergistaceae	4.86112e-06	0	2.18403e-05	0	0	0	0	0	0	2.47884e-05
0.1.55.1.10.5	Bacteria;Tenericutes;Mollicutes;NB1-n;uncultured_bacterium	4.86112e-06	3.84283e-05	2.18403e-05	0	0	0	0	0	0	0
0.1.54.9.1.1	Bacteria;TM6;uncultured_Verrucomicrobia_bacterium;unclassified;unclassified	4.86112e-06	1.92141e-05	0	0	0	0	0	0	2.17505e-05	0
0.1.59.3.1.1	Bacteria;WCHB1-60;uncultured_Candidatus_Saccharibacteria_sp.;unclassified;unclassified	4.86112e-06	1.92141e-05	4.36805e-05	0	0	0	0	0	0	0
0.1.1.1.9.4	Bacteria;Acidobacteria;Acidobacteria;Subgroup_15;uncultured_bacterium	3.24075e-06	3.84283e-05	0	0	0	0	0	0	0	0
0.1.1.1.12.2	Bacteria;Acidobacteria;Acidobacteria;Subgroup_19;uncultured_bacterium	3.24075e-06	1.92141e-05	2.18403e-05	0	0	0	0	0	0	0
0.1.1.1.16.1	Bacteria;Acidobacteria;Acidobacteria;Subgroup_25;unclassified	3.24075e-06	0	4.36805e-05	0	0	0	0	0	0	0
0.1.1.1.18.2	Bacteria;Acidobacteria;Acidobacteria;Subgroup_4;DS-100	3.24075e-06	1.92141e-05	2.18403e-05	0	0	0	0	0	0	0
0.1.1.1.20.62	Bacteria;Acidobacteria;Acidobacteria;Subgroup_6;uncultured_proteobacterium	3.24075e-06	1.92141e-05	2.18403e-05	0	0	0	0	0	0	0
0.1.1.1.20.66	Bacteria;Acidobacteria;Acidobacteria;Subgroup_6;unidentified	3.24075e-06	0	0	0	0	1.26563e-05	0	0	0	1.23942e-05
0.1.1.2.7.4	Bacteria;Acidobacteria;Holophagae;Subgroup_10;Sva0725	3.24075e-06	1.92141e-05	0	0	0	1.26563e-05	0	0	0	0
0.1.1.3.2.1	Bacteria;Acidobacteria;Subgroup_22;uncultured_Acidobacteria_bacterium;unclassified	3.24075e-06	3.84283e-05	0	0	0	0	0	0	0	0
0.1.2.2.11.21	Bacteria;Actinobacteria;Actinobacteria;Micrococcales;Sanguibacteraceae	3.24075e-06	0	0	0	1.40282e-05	1.26563e-05	0	0	0	0
0.1.2.2.13.13	Bacteria;Actinobacteria;Actinobacteria;PeM15;uncultured_soil_bacterium	3.24075e-06	0	2.18403e-05	0	0	0	0	0	1.08752e-05	0
0.1.2.2.14.3	Bacteria;Actinobacteria;Actinobacteria;Propionibacteriales;unclassified	3.24075e-06	0	4.36805e-05	0	0	0	0	0	0	0
0.1.2.6.12.1	Bacteria;Actinobacteria;MB-A2-108;uncultured_bacterium;unclassified	3.24075e-06	0	4.36805e-05	0	0	0	0	0	0	0
0.1.2.7.1.1	Bacteria;Actinobacteria;Nitriliruptoria;Euzebyales;Euzebyaceae	3.24075e-06	0	4.36805e-05	0	0	0	0	0	0	0
0.1.2.11.2.5	Bacteria;Actinobacteria;Thermoleophilia;Solirubrobacterales;Elev-16S-1332	3.24075e-06	0	0	0	1.40282e-05	0	1.35448e-05	0	0	0
0.1.4.2.1.3	Bacteria;Armatimonadetes;Chthonomonadetes;Chthonomonadales;unclassified	3.24075e-06	1.92141e-05	2.18403e-05	0	0	0	0	0	0	0
0.1.4.17.1.1	Bacteria;Armatimonadetes;uncultured_actinobacterium;unclassified;unclassified	3.24075e-06	1.92141e-05	0	0	0	1.26563e-05	0	0	0	0
0.1.4.19.1.1	Bacteria;Armatimonadetes;uncultured_bacterium;unclassified;unclassified	3.24075e-06	0	2.18403e-05	0	0	0	1.35448e-05	0	0	0
0.1.4.12.1.1	Bacteria;Armatimonadetes;uncultured_Firmicutes_bacterium;unclassified;unclassified	3.24075e-06	3.84283e-05	0	0	0	0	0	0	0	0
0.1.7.2.4.1	Bacteria;Bacteroidetes;BSV13;uncultured_Bacteroidetes_bacterium;unclassified	3.24075e-06	0	2.18403e-05	0	1.40282e-05	0	0	0	0	0
0.1.7.6.1.7	Bacteria;Bacteroidetes;Flavobacteriia;Flavobacteriales;Schleiferiaceae	3.24075e-06	1.92141e-05	2.18403e-05	0	0	0	0	0	0	0
0.1.7.13.1.8	Bacteria;Bacteroidetes;Sphingobacteriia;Sphingobacteriales;KD1-131	3.24075e-06	0	0	0	2.80564e-05	0	0	0	0	0
0.1.7.14.11.1	Bacteria;Bacteroidetes;VC2.1_Bac22;uncultured_bacterium;unclassified	3.24075e-06	0	4.36805e-05	0	0	0	0	0	0	0
0.1.5.25.1.1	Bacteria;BD1-5;uncultured_epsilon_proteobacterium;unclassified;unclassified	3.24075e-06	1.92141e-05	0	0	0	0	0	0	0	1.23942e-05
0.1.13.18.1.1	Bacteria;Candidate_division_OD1;uncultured_alpha_proteobacterium;unclassified;unclassified	3.24075e-06	3.84283e-05	0	0	0	0	0	0	0	0
0.1.13.24.1.1	Bacteria;Candidate_division_OD1;uncultured_epsilon_proteobacterium;unclassified;unclassified	3.24075e-06	1.92141e-05	0	0	0	0	0	0	0	1.23942e-05
0.1.13.27.1.1	Bacteria;Candidate_division_OD1;uncultured_planctomycete;unclassified;unclassified	3.24075e-06	3.84283e-05	0	0	0	0	0	0	0	0
0.1.14.10.1.1	Bacteria;Candidate_division_OP11;uncultured_Anaerolineales_bacterium;unclassified;unclassified	3.24075e-06	1.92141e-05	0	0	0	0	0	0	0	1.23942e-05
0.1.14.28.1.1	Bacteria;Candidate_division_OP11;uncultured_soil_bacterium;unclassified;unclassified	3.24075e-06	0	0	0	0	0	0	0	0	2.47884e-05
0.1.15.4.1.1	Bacteria;Candidate_division_OP3;uncultured_Banisveld_landfill_bacterium_BVC56;unclassified;unclassified	3.24075e-06	1.92141e-05	2.18403e-05	0	0	0	0	0	0	0
0.1.18.8.1.1	Bacteria;Candidate_division_SR1;uncultured_bacterium;unclassified;unclassified	3.24075e-06	0	0	0	0	1.26563e-05	0	0	1.08752e-05	0
0.1.20.17.1.1	Bacteria;Candidate_division_WS3;uncultured_bacterium;unclassified;unclassified	3.24075e-06	1.92141e-05	2.18403e-05	0	0	0	0	0	0	0
0.1.20.28.1.1	Bacteria;Candidate_division_WS3;uncultured_soil_bacterium;unclassified;unclassified	3.24075e-06	1.92141e-05	2.18403e-05	0	0	0	0	0	0	0
0.1.22.1.1.6	Bacteria;Chlamydiae;Chlamydiae;Chlamydiales;Waddliaceae	3.24075e-06	1.92141e-05	0	0	0	0	0	0	0	1.23942e-05
0.1.23.2.1.7	Bacteria;Chlorobi;Ignavibacteria;Ignavibacteriales;LD-RB-34	3.24075e-06	0	0	0	0	0	0	0	2.17505e-05	0
0.1.24.9.3.1	Bacteria;Chloroflexi;JG30-KF-CM66;uncultured_Armatimonadetes_bacterium;unclassified	3.24075e-06	1.92141e-05	0	0	0	1.26563e-05	0	0	0	0
0.1.24.13.3.2	Bacteria;Chloroflexi;Ktedonobacteria;C0119;uncultured_Chloroflexi_bacterium	3.24075e-06	0	2.18403e-05	0	0	0	0	0	1.08752e-05	0
0.1.24.15.3.1	Bacteria;Chloroflexi;P2-11E;uncultured_bacterium;unclassified	3.24075e-06	1.92141e-05	0	0	1.40282e-05	0	0	0	0	0
0.1.24.18.1.1	Bacteria;Chloroflexi;SHA-26;unclassified;unclassified	3.24075e-06	0	0	0.000132837	0	0	0	0	0	0
0.1.24.20.12.1	Bacteria;Chloroflexi;TK10;uncultured_gamma_proteobacterium;unclassified	3.24075e-06	3.84283e-05	0	0	0	0	0	0	0	0
0.1.24.24.1.1	Bacteria;Chloroflexi;uncultured_Bellilinea_sp.;unclassified;unclassified	3.24075e-06	0	0	0	0	0	0	0	2.17505e-05	0
0.1.24.23.2.1	Bacteria;Chloroflexi;uncultured;hot_springs_metagenome;unclassified	3.24075e-06	0	4.36805e-05	0	0	0	0	0	0	0
0.1.26.2.9.1	Bacteria;Cyanobacteria;Cyanobacteria;SubsectionV;FamilyI	3.24075e-06	0	0	0	0	1.26563e-05	1.35448e-05	0	0	0
0.1.26.2.16.1	Bacteria;Cyanobacteria;Cyanobacteria;uncultured_bacterium;unclassified	3.24075e-06	1.92141e-05	0	0	0	1.26563e-05	0	0	0	0
0.1.30.1.11.2	Bacteria;Elusimicrobia;Elusimicrobia;Rs-M47;uncultured_bacterium	3.24075e-06	0	2.18403e-05	0	0	1.26563e-05	0	0	0	0
0.1.31.1.5.1	Bacteria;Fibrobacteres;Fibrobacteria;uncultured_bacterium;unclassified	3.24075e-06	1.92141e-05	2.18403e-05	0	0	0	0	0	0	0
0.1.32.1.2.6	Bacteria;Firmicutes;Bacilli;Bacillales;Listeriaceae	3.24075e-06	0	4.36805e-05	0	0	0	0	0	0	0
0.1.32.1.2.15	Bacteria;Firmicutes;Bacilli;Bacillales;uncultured	3.24075e-06	0	0	0	0	0	0	0	2.17505e-05	0
0.1.32.2.3.2	Bacteria;Firmicutes;Clostridia;D8A-2;unclassified	3.24075e-06	0	0	6.64187e-05	0	0	0	9.30293e-06	0	0
0.1.32.4.1.1	Bacteria;Firmicutes;Negativicutes;Selenomonadales;Acidaminococcaceae	3.24075e-06	0	0	0	0	0	0	0	0	2.47884e-05
0.1.32.4.1.4	Bacteria;Firmicutes;Negativicutes;Selenomonadales;uncultured	3.24075e-06	1.92141e-05	0	0	0	1.26563e-05	0	0	0	0
0.1.36.1.2.11	Bacteria;Gemmatimonadetes;Gemmatimonadetes;BD2-11_terrestrial_group;uncultured_bacterium	3.24075e-06	1.92141e-05	2.18403e-05	0	0	0	0	0	0	0
0.1.40.7.4.1	Bacteria;Lentisphaerae;DEV055;uncultured_bacterium;unclassified	3.24075e-06	0	2.18403e-05	0	0	0	0	0	1.08752e-05	0
0.1.40.16.6.1	Bacteria;Lentisphaerae;Oligosphaeria;uncultured_Lentisphaerae_bacterium;unclassified	3.24075e-06	0	0	0	1.40282e-05	1.26563e-05	0	0	0	0
0.1.42.1.1.6	Bacteria;Nitrospirae;Nitrospira;Nitrospirales;MIZ17	3.24075e-06	0	2.18403e-05	0	0	1.26563e-05	0	0	0	0
0.1.44.3.2.1	Bacteria;Planctomycetes;C47;uncultured_bacterium;unclassified	3.24075e-06	0	0	0	1.40282e-05	1.26563e-05	0	0	0	0
0.1.44.7.4.3	Bacteria;Planctomycetes;Phycisphaerae;C86;uncultured_planctomycete	3.24075e-06	1.92141e-05	2.18403e-05	0	0	0	0	0	0	0
0.1.44.7.6.3	Bacteria;Planctomycetes;Phycisphaerae;CPla-3_termite_group;uncultured_planctomycete	3.24075e-06	1.92141e-05	0	0	0	0	1.35448e-05	0	0	0
0.1.44.7.13.2	Bacteria;Planctomycetes;Phycisphaerae;Pla1_lineage;uncultured_bacterium	3.24075e-06	0	4.36805e-05	0	0	0	0	0	0	0
0.1.44.10.1.1	Bacteria;Planctomycetes;Planctomycetacia;Brocadiales;Brocadiaceae	3.24075e-06	0	0	0	0	0	0	1.86059e-05	0	0
0.1.45.4.6.12	Bacteria;Proteobacteria;Alphaproteobacteria;DB1-14;uncultured_marine_bacterium	3.24075e-06	0	0	0	0	0	0	0	1.08752e-05	1.23942e-05
0.1.45.4.6.13	Bacteria;Proteobacteria;Alphaproteobacteria;DB1-14;uncultured_organism	3.24075e-06	0	0	0	0	1.26563e-05	0	0	0	1.23942e-05
0.1.45.4.6.16	Bacteria;Proteobacteria;Alphaproteobacteria;DB1-14;uncultured_sludge_bacterium_S43	3.24075e-06	1.92141e-05	0	0	0	0	0	0	0	1.23942e-05
0.1.45.4.8.7	Bacteria;Proteobacteria;Alphaproteobacteria;E6aD10;uncultured_alpha_proteobacterium	3.24075e-06	1.92141e-05	0	0	0	0	1.35448e-05	0	0	0
0.1.45.4.15.1	Bacteria;Proteobacteria;Alphaproteobacteria;Rhodospirillales;AKYH478	3.24075e-06	0	4.36805e-05	0	0	0	0	0	0	0
0.1.45.6.5.10	Bacteria;Proteobacteria;Betaproteobacteria;Burkholderiales;uncultured_bacterium	3.24075e-06	0	4.36805e-05	0	0	0	0	0	0	0
0.1.45.6.15.27	Bacteria;Proteobacteria;Betaproteobacteria;SC-I-84;uncultured_proteobacterium	3.24075e-06	0	2.18403e-05	0	1.40282e-05	0	0	0	0	0
0.1.45.7.2.2	Bacteria;Proteobacteria;Deltaproteobacteria;43F-1404R;unclassified	3.24075e-06	0	0	0	0	2.53126e-05	0	0	0	0
0.1.45.7.9.2	Bacteria;Proteobacteria;Deltaproteobacteria;Desulfovibrionales;Desulfomicrobiaceae	3.24075e-06	0	0	0	1.40282e-05	0	0	9.30293e-06	0	0
0.1.45.7.11.3	Bacteria;Proteobacteria;Deltaproteobacteria;Desulfuromonadales;AKYG597	3.24075e-06	0	0	0	0	0	0	0	0	2.47884e-05
0.1.45.7.13.2	Bacteria;Proteobacteria;Deltaproteobacteria;GR-WP33-30;bacterium_enrichment_culture_clone_B30	3.24075e-06	1.92141e-05	0	0	0	1.26563e-05	0	0	0	0
0.1.45.7.13.17	Bacteria;Proteobacteria;Deltaproteobacteria;GR-WP33-30;uncultured_bacterium	3.24075e-06	0	4.36805e-05	0	0	0	0	0	0	0
0.1.45.7.13.13	Bacteria;Proteobacteria;Deltaproteobacteria;GR-WP33-30;uncultured_Myxococcales_bacterium	3.24075e-06	1.92141e-05	2.18403e-05	0	0	0	0	0	0	0
0.1.45.7.13.28	Bacteria;Proteobacteria;Deltaproteobacteria;GR-WP33-30;uncultured_soil_bacterium	3.24075e-06	1.92141e-05	2.18403e-05	0	0	0	0	0	0	0
0.1.45.7.13.14	Bacteria;Proteobacteria;Deltaproteobacteria;GR-WP33-30;uncultured_Sorangiineae_bacterium	3.24075e-06	0	4.36805e-05	0	0	0	0	0	0	0
0.1.45.11.1.1	Bacteria;Proteobacteria;Gammaproteobacteria;1013-28-CG33;unclassified	3.24075e-06	1.92141e-05	2.18403e-05	0	0	0	0	0	0	0
0.1.45.11.4.2	Bacteria;Proteobacteria;Gammaproteobacteria;Acidithiobacillales;Acidithiobacillaceae	3.24075e-06	0	0	6.64187e-05	0	0	0	0	0	1.23942e-05
0.1.45.11.20.3	Bacteria;Proteobacteria;Gammaproteobacteria;E01-9C-26_marine_group;unclassified	3.24075e-06	0	0	0	0	2.53126e-05	0	0	0	0
0.1.45.11.29.6	Bacteria;Proteobacteria;Gammaproteobacteria;KI89A_clade;uncultured_gamma_proteobacterium	3.24075e-06	1.92141e-05	2.18403e-05	0	0	0	0	0	0	0
0.1.45.11.30.6	Bacteria;Proteobacteria;Gammaproteobacteria;KM16;uncultured_bacterium	3.24075e-06	0	4.36805e-05	0	0	0	0	0	0	0
0.1.45.11.34.12	Bacteria;Proteobacteria;Gammaproteobacteria;NKB5;uncultured_organism	3.24075e-06	0	0	0	1.40282e-05	0	0	0	1.08752e-05	0
0.1.45.11.51.4	Bacteria;Proteobacteria;Gammaproteobacteria;Thiotrichales;Francisellaceae	3.24075e-06	1.92141e-05	2.18403e-05	0	0	0	0	0	0	0
0.1.45.11.52.1	Bacteria;Proteobacteria;Gammaproteobacteria;Vibrionales;Vibrionaceae	3.24075e-06	0	0	0	0	0	0	9.30293e-06	1.08752e-05	0
0.1.50.6.1.1	Bacteria;SM2F11;uncultured_organism;unclassified;unclassified	3.24075e-06	0	0	0	0	0	0	0	2.17505e-05	0
0.1.51.1.14.3	Bacteria;Spirochaetae;Spirochaetes;Spirochaetales;LH041	3.24075e-06	0	2.18403e-05	0	0	0	0	0	1.08752e-05	0
0.1.55.1.3.2	Bacteria;Tenericutes;Mollicutes;DMI;uncultured_bacterium	3.24075e-06	1.92141e-05	2.18403e-05	0	0	0	0	0	0	0
0.1.55.1.6.5	Bacteria;Tenericutes;Mollicutes;Entomoplasmatales;unclassified	3.24075e-06	3.84283e-05	0	0	0	0	0	0	0	0
0.1.55.1.11.14	Bacteria;Tenericutes;Mollicutes;RF9;uncultured_bacterium	3.24075e-06	0	0	0	1.40282e-05	0	0	0	1.08752e-05	0
0.1.55.1.12.1	Bacteria;Tenericutes;Mollicutes;unclassified;unclassified	3.24075e-06	1.92141e-05	0	0	0	0	0	9.30293e-06	0	0
0.1.54.6.1.1	Bacteria;TM6;uncultured_Acidobacterium_sp.;unclassified;unclassified	3.24075e-06	0	2.18403e-05	0	0	0	0	0	0	1.23942e-05
0.1.58.2.27.1	Bacteria;Verrucomicrobia;OPB35_soil_group;uncultured_archaeon;unclassified	3.24075e-06	1.92141e-05	2.18403e-05	0	0	0	0	0	0	0
0.1.1.1.6.5	Bacteria;Acidobacteria;Acidobacteria;Subgroup_11;uncultured_bacterium	1.62037e-06	0	2.18403e-05	0	0	0	0	0	0	0
0.1.1.1.8.2	Bacteria;Acidobacteria;Acidobacteria;Subgroup_13;uncultured_Acidobacteria_bacterium	1.62037e-06	0	0	0	0	0	0	0	1.08752e-05	0
0.1.1.1.10.8	Bacteria;Acidobacteria;Acidobacteria;Subgroup_17;uncultured_bacterium	1.62037e-06	0	2.18403e-05	0	0	0	0	0	0	0
0.1.1.1.11.4	Bacteria;Acidobacteria;Acidobacteria;Subgroup_18;uncultured_bacterium	1.62037e-06	0	0	0	0	0	0	0	0	1.23942e-05
0.1.1.1.16.2	Bacteria;Acidobacteria;Acidobacteria;Subgroup_25;uncultured_Acidobacteria_bacterium	1.62037e-06	0	2.18403e-05	0	0	0	0	0	0	0
0.1.1.1.16.6	Bacteria;Acidobacteria;Acidobacteria;Subgroup_25;uncultured_soil_bacterium	1.62037e-06	0	2.18403e-05	0	0	0	0	0	0	0
0.1.1.1.17.5	Bacteria;Acidobacteria;Acidobacteria;Subgroup_3;GOUTB8	1.62037e-06	0	0	0	0	0	0	9.30293e-06	0	0
0.1.1.1.19.6	Bacteria;Acidobacteria;Acidobacteria;Subgroup_5;uncultured_Holophaga_sp.	1.62037e-06	1.92141e-05	0	0	0	0	0	0	0	0
0.1.1.1.20.27	Bacteria;Acidobacteria;Acidobacteria;Subgroup_6;uncultured_Holophaga_sp.	1.62037e-06	0	2.18403e-05	0	0	0	0	0	0	0
0.1.1.2.7.3	Bacteria;Acidobacteria;Holophagae;Subgroup_10;NS72	1.62037e-06	0	2.18403e-05	0	0	0	0	0	0	0
0.1.1.2.9.1	Bacteria;Acidobacteria;Holophagae;Subgroup_7;Acidobacteria_bacterium_enrichment_culture_clone_CV-04	1.62037e-06	0	2.18403e-05	0	0	0	0	0	0	0
0.1.1.2.9.4	Bacteria;Acidobacteria;Holophagae;Subgroup_7;uncultured_Acidobacteria_bacterium	1.62037e-06	0	2.18403e-05	0	0	0	0	0	0	0
0.1.1.2.9.12	Bacteria;Acidobacteria;Holophagae;Subgroup_7;uncultured_bacterium	1.62037e-06	0	0	0	0	0	0	0	1.08752e-05	0
0.1.1.2.9.16	Bacteria;Acidobacteria;Holophagae;Subgroup_7;uncultured_proteobacterium	1.62037e-06	0	0	0	0	0	0	0	0	1.23942e-05
0.1.1.3.5.1	Bacteria;Acidobacteria;Subgroup_22;uncultured_Acidobacterium_sp.;unclassified	1.62037e-06	0	2.18403e-05	0	0	0	0	0	0	0
0.1.1.3.10.1	Bacteria;Acidobacteria;Subgroup_22;uncultured_prokaryote;unclassified	1.62037e-06	0	2.18403e-05	0	0	0	0	0	0	0
0.1.1.4.1.1	Bacteria;Acidobacteria;Subgroup_26;unclassified;unclassified	1.62037e-06	0	0	0	0	0	0	0	0	1.23942e-05
0.1.1.5.1.1	Bacteria;Acidobacteria;unclassified;unclassified;unclassified	1.62037e-06	1.92141e-05	0	0	0	0	0	0	0	0
0.1.2.1.1.5	Bacteria;Actinobacteria;Acidimicrobiia;Acidimicrobiales;Sva0996_marine_group	1.62037e-06	1.92141e-05	0	0	0	0	0	0	0	0
0.1.2.1.1.8	Bacteria;Actinobacteria;Acidimicrobiia;Acidimicrobiales;uncultured_actinobacterium	1.62037e-06	1.92141e-05	0	0	0	0	0	0	0	0
0.1.2.2.6.1	Bacteria;Actinobacteria;Actinobacteria;Corynebacteriales;Corynebacteriaceae	1.62037e-06	0	0	0	0	0	0	9.30293e-06	0	0
0.1.2.2.11.18	Bacteria;Actinobacteria;Actinobacteria;Micrococcales;Promicromonosporaceae	1.62037e-06	0	0	0	0	0	0	9.30293e-06	0	0
0.1.2.5.3.1	Bacteria;Actinobacteria;KIST-JJY010;uncultured_bacterium;unclassified	1.62037e-06	0	0	0	0	0	0	0	0	1.23942e-05
0.1.2.6.14.1	Bacteria;Actinobacteria;MB-A2-108;uncultured_bacterium_#0425-2M17;unclassified	1.62037e-06	1.92141e-05	0	0	0	0	0	0	0	0
0.1.2.8.4.1	Bacteria;Actinobacteria;OPB41;uncultured_bacterium;unclassified	1.62037e-06	1.92141e-05	0	0	0	0	0	0	0	0
0.1.4.1.1.9	Bacteria;Armatimonadetes;Armatimonadia;Armatimonadales;uncultured_soil_bacterium	1.62037e-06	0	0	0	0	0	0	9.30293e-06	0	0
0.1.4.26.1.1	Bacteria;Armatimonadetes;uncultured_bacterium_SJA-176;unclassified;unclassified	1.62037e-06	1.92141e-05	0	0	0	0	0	0	0	0
0.1.4.29.1.1	Bacteria;Armatimonadetes;uncultured_endolithic_bacterium;unclassified;unclassified	1.62037e-06	1.92141e-05	0	0	0	0	0	0	0	0
0.1.4.30.1.1	Bacteria;Armatimonadetes;uncultured_microorganism;unclassified;unclassified	1.62037e-06	0	0	0	0	0	0	0	1.08752e-05	0
0.1.4.14.1.1	Bacteria;Armatimonadetes;uncultured_Planctomycetales_bacterium;unclassified;unclassified	1.62037e-06	0	2.18403e-05	0	0	0	0	0	0	0
0.1.7.4.1.3	Bacteria;Bacteroidetes;Bacteroidia;Bacteroidales;BS11_gut_group	1.62037e-06	0	2.18403e-05	0	0	0	0	0	0	0
0.1.7.4.1.9	Bacteria;Bacteroidetes;Bacteroidia;Bacteroidales;FTLpost3	1.62037e-06	0	2.18403e-05	0	0	0	0	0	0	0
0.1.7.4.1.12	Bacteria;Bacteroidetes;Bacteroidia;Bacteroidales;M2PB4-65_termite_group	1.62037e-06	0	0	0	1.40282e-05	0	0	0	0	0
0.1.7.4.1.29	Bacteria;Bacteroidetes;Bacteroidia;Bacteroidales;uncultured	1.62037e-06	0	0	0	1.40282e-05	0	0	0	0	0
0.1.7.2.7.1	Bacteria;Bacteroidetes;BSV13;uncultured_bacterium;unclassified	1.62037e-06	0	0	0	0	1.26563e-05	0	0	0	0
0.1.7.10.6.1	Bacteria;Bacteroidetes;SB-5;uncultured_bacterium;unclassified	1.62037e-06	0	0	0	0	0	0	0	1.08752e-05	0
0.1.7.12.4.1	Bacteria;Bacteroidetes;SM1A07;uncultured_Chlorobi_bacterium;unclassified	1.62037e-06	0	0	0	0	0	0	0	0	1.23942e-05
0.1.7.13.1.7	Bacteria;Bacteroidetes;Sphingobacteriia;Sphingobacteriales;FFCH9454	1.62037e-06	1.92141e-05	0	0	0	0	0	0	0	0
0.1.7.13.1.13	Bacteria;Bacteroidetes;Sphingobacteriia;Sphingobacteriales;S15-21	1.62037e-06	1.92141e-05	0	0	0	0	0	0	0	0
0.1.7.13.1.14	Bacteria;Bacteroidetes;Sphingobacteriia;Sphingobacteriales;S15A-MN91	1.62037e-06	0	0	0	0	1.26563e-05	0	0	0	0
0.1.7.17.13.1	Bacteria;Bacteroidetes;vadinHA17;uncultured_bacterium;unclassified	1.62037e-06	0	0	0	0	1.26563e-05	0	0	0	0
0.1.7.15.9.1	Bacteria;Bacteroidetes;WCHB1-32;uncultured_soil_bacterium;unclassified	1.62037e-06	0	0	0	1.40282e-05	0	0	0	0	0
0.1.5.5.1.1	Bacteria;BD1-5;Gracilibacteria_bacterium_canine_oral_taxon_394;unclassified;unclassified	1.62037e-06	1.92141e-05	0	0	0	0	0	0	0	0
0.1.6.4.1.1	Bacteria;BHI80-139;unclassified;unclassified;unclassified	1.62037e-06	0	2.18403e-05	0	0	0	0	0	0	0
0.1.9.1.1.1	Bacteria;Caldiserica;Caldisericia;Caldisericales;08D2Z23	1.62037e-06	0	2.18403e-05	0	0	0	0	0	0	0
0.1.10.4.1.1	Bacteria;Candidate_division_BRC1;uncultured_Acidobacteria_bacterium;unclassified;unclassified	1.62037e-06	0	2.18403e-05	0	0	0	0	0	0	0
0.1.13.13.1.1	Bacteria;Candidate_division_OD1;uncultured_Crater_Lake_bacterium_CL500-94;unclassified;unclassified	1.62037e-06	1.92141e-05	0	0	0	0	0	0	0	0
0.1.13.14.1.1	Bacteria;Candidate_division_OD1;uncultured_Latescibacteria_bacterium;unclassified;unclassified	1.62037e-06	1.92141e-05	0	0	0	0	0	0	0	0
0.1.13.26.1.1	Bacteria;Candidate_division_OD1;uncultured_organism;unclassified;unclassified	1.62037e-06	1.92141e-05	0	0	0	0	0	0	0	0
0.1.14.16.1.1	Bacteria;Candidate_division_OP11;uncultured_candidate_division_WS6_bacterium;unclassified;unclassified	1.62037e-06	0	0	0	0	0	0	0	0	1.23942e-05
0.1.15.18.1.1	Bacteria;Candidate_division_OP3;uncultured_soil_bacterium;unclassified;unclassified	1.62037e-06	0	0	0	0	0	0	9.30293e-06	0	0
0.1.18.11.1.1	Bacteria;Candidate_division_SR1;uncultured_candidate_division_SR1_bacterium;unclassified;unclassified	1.62037e-06	0	0	0	0	1.26563e-05	0	0	0	0
0.1.20.9.1.1	Bacteria;Candidate_division_WS3;uncultured_Bacteroidetes_bacterium;unclassified;unclassified	1.62037e-06	0	2.18403e-05	0	0	0	0	0	0	0
0.1.20.30.1.1	Bacteria;Candidate_division_WS3;uncultured_soil_bacterium_PBS-III-30;unclassified;unclassified	1.62037e-06	0	2.18403e-05	0	0	0	0	0	0	0
0.1.23.2.1.8	Bacteria;Chlorobi;Ignavibacteria;Ignavibacteriales;PHOS-HE36	1.62037e-06	1.92141e-05	0	0	0	0	0	0	0	0
0.1.24.2.3.8	Bacteria;Chloroflexi;Ardenticatenia;uncultured;uncultured_organism	1.62037e-06	0	2.18403e-05	0	0	0	0	0	0	0
0.1.24.2.3.9	Bacteria;Chloroflexi;Ardenticatenia;uncultured;uncultured_prokaryote	1.62037e-06	1.92141e-05	0	0	0	0	0	0	0	0
0.1.24.5.1.2	Bacteria;Chloroflexi;Chloroflexia;AKIW781;unclassified	1.62037e-06	1.92141e-05	0	0	0	0	0	0	0	0
0.1.24.6.2.3	Bacteria;Chloroflexi;Dehalococcoidia;FS117-23B-02;uncultured_bacterium	1.62037e-06	0	0	0	0	0	0	0	1.08752e-05	0
0.1.24.6.6.4	Bacteria;Chloroflexi;Dehalococcoidia;MSBL5;uncultured_bacterium	1.62037e-06	0	0	0	0	0	0	9.30293e-06	0	0
0.1.24.6.12.6	Bacteria;Chloroflexi;Dehalococcoidia;vadinBA26;uncultured_Dehalococcoides_sp.	1.62037e-06	0	2.18403e-05	0	0	0	0	0	0	0
0.1.24.11.8.1	Bacteria;Chloroflexi;KD4-96;uncultured_bacterium;unclassified	1.62037e-06	0	0	0	0	0	1.35448e-05	0	0	0
0.1.24.13.3.3	Bacteria;Chloroflexi;Ktedonobacteria;C0119;uncultured_bacterium	1.62037e-06	0	0	0	1.40282e-05	0	0	0	0	0
0.1.24.13.7.2	Bacteria;Chloroflexi;Ktedonobacteria;MVP-21;uncultured_bacterium	1.62037e-06	0	2.18403e-05	0	0	0	0	0	0	0
0.1.24.16.6.1	Bacteria;Chloroflexi;S085;uncultured_soil_bacterium;unclassified	1.62037e-06	0	2.18403e-05	0	0	0	0	0	0	0
0.1.24.17.12.1	Bacteria;Chloroflexi;SAR202_clade;uncultured_Crater_Lake_bacterium_CL500-9;unclassified	1.62037e-06	1.92141e-05	0	0	0	0	0	0	0	0
0.1.24.17.17.1	Bacteria;Chloroflexi;SAR202_clade;uncultured_deep-sea_bacterium;unclassified	1.62037e-06	1.92141e-05	0	0	0	0	0	0	0	0
0.1.24.18.7.1	Bacteria;Chloroflexi;SHA-26;uncultured_bacterium;unclassified	1.62037e-06	0	0	6.64187e-05	0	0	0	0	0	0
0.1.24.18.4.1	Bacteria;Chloroflexi;SHA-26;uncultured_Chloroflexus_sp.;unclassified	1.62037e-06	0	2.18403e-05	0	0	0	0	0	0	0
0.1.24.21.2.9	Bacteria;Chloroflexi;Thermomicrobia;JG30-KF-CM45;uncultured_soil_bacterium	1.62037e-06	1.92141e-05	0	0	0	0	0	0	0	0
0.1.24.20.7.1	Bacteria;Chloroflexi;TK10;uncultured_Dehalococcoidetes_bacterium;unclassified	1.62037e-06	1.92141e-05	0	0	0	0	0	0	0	0
0.1.24.20.8.1	Bacteria;Chloroflexi;TK10;uncultured_Dehalogenimonas_sp.;unclassified	1.62037e-06	0	0	0	0	0	0	0	0	1.23942e-05
0.1.24.20.13.1	Bacteria;Chloroflexi;TK10;uncultured_soil_bacterium;unclassified	1.62037e-06	1.92141e-05	0	0	0	0	0	0	0	0
0.1.24.23.19.1	Bacteria;Chloroflexi;uncultured;uncultured_bacterium_UASB_TL14;unclassified	1.62037e-06	1.92141e-05	0	0	0	0	0	0	0	0
0.1.24.23.6.1	Bacteria;Chloroflexi;uncultured;uncultured_Chloroflexi_bacterium;unclassified	1.62037e-06	1.92141e-05	0	0	0	0	0	0	0	0
0.1.24.23.26.1	Bacteria;Chloroflexi;uncultured;uncultured_soil_bacterium;unclassified	1.62037e-06	0	0	0	0	0	0	0	1.08752e-05	0
0.1.26.2.15.15	Bacteria;Cyanobacteria;Cyanobacteria;uncultured;unclassified	1.62037e-06	1.92141e-05	0	0	0	0	0	0	0	0
0.1.26.2.15.19	Bacteria;Cyanobacteria;Cyanobacteria;uncultured;uncultured_bacterium	1.62037e-06	0	0	6.64187e-05	0	0	0	0	0	0
0.1.26.4.2.6	Bacteria;Cyanobacteria;Melainabacteria;Gastranaerophilales;uncultured_Merismopedia_sp.	1.62037e-06	0	0	0	1.40282e-05	0	0	0	0	0
0.1.26.4.2.9	Bacteria;Cyanobacteria;Melainabacteria;Gastranaerophilales;uncultured_organism	1.62037e-06	1.92141e-05	0	0	0	0	0	0	0	0
0.1.26.4.4.7	Bacteria;Cyanobacteria;Melainabacteria;Vampirovibrionales;uncultured_soil_bacterium	1.62037e-06	0	0	0	0	0	0	0	0	1.23942e-05
0.1.26.3.16.1	Bacteria;Cyanobacteria;ML635J-21;uncultured_soil_bacterium;unclassified	1.62037e-06	0	2.18403e-05	0	0	0	0	0	0	0
0.1.27.1.1.6	Bacteria;Deferribacteres;Deferribacteres;Deferribacterales;unclassified	1.62037e-06	0	2.18403e-05	0	0	0	0	0	0	0
0.1.28.1.3.1	Bacteria;Deinococcus-Thermus;Deinococci;Thermales;Thermaceae	1.62037e-06	0	2.18403e-05	0	0	0	0	0	0	0
0.1.30.1.3.1	Bacteria;Elusimicrobia;Elusimicrobia;FCPU453;unclassified	1.62037e-06	0	0	0	0	1.26563e-05	0	0	0	0
0.1.30.1.3.2	Bacteria;Elusimicrobia;Elusimicrobia;FCPU453;uncultured_Termite_group_1_bacterium	1.62037e-06	0	2.18403e-05	0	0	0	0	0	0	0
0.1.30.1.8.7	Bacteria;Elusimicrobia;Elusimicrobia;Lineage_I_(Endomicrobia);uncultured_bacterium	1.62037e-06	0	0	0	0	1.26563e-05	0	0	0	0
0.1.30.1.10.4	Bacteria;Elusimicrobia;Elusimicrobia;MVP-88;uncultured_deep-sea_bacterium	1.62037e-06	1.92141e-05	0	0	0	0	0	0	0	0
0.1.31.1.1.4	Bacteria;Fibrobacteres;Fibrobacteria;Fibrobacterales;B18	1.62037e-06	0	0	0	1.40282e-05	0	0	0	0	0
0.1.31.1.3.3	Bacteria;Fibrobacteres;Fibrobacteria;possible_order_07;uncultured_bacterium	1.62037e-06	0	0	0	1.40282e-05	0	0	0	0	0
0.1.32.1.2.8	Bacteria;Firmicutes;Bacilli;Bacillales;Pasteuriaceae	1.62037e-06	0	0	0	0	0	0	0	0	1.23942e-05
0.1.32.1.5.2	Bacteria;Firmicutes;Bacilli;Lactobacillales;Aerococcaceae	1.62037e-06	0	0	0	0	0	0	0	0	1.23942e-05
0.1.32.2.2.7	Bacteria;Firmicutes;Clostridia;Clostridiales;Clostridiales_Incertae_Sedis	1.62037e-06	1.92141e-05	0	0	0	0	0	0	0	0
0.1.32.2.2.17	Bacteria;Firmicutes;Clostridia;Clostridiales;Family_XVIII	1.62037e-06	0	0	0	1.40282e-05	0	0	0	0	0
0.1.32.2.3.9	Bacteria;Firmicutes;Clostridia;D8A-2;uncultured_bacterium	1.62037e-06	0	0	6.64187e-05	0	0	0	0	0	0
0.1.32.2.7.5	Bacteria;Firmicutes;Clostridia;Thermoanaerobacterales;Thermoanaerobacteraceae	1.62037e-06	0	0	0	0	0	0	9.30293e-06	0	0
0.1.33.1.1.7	Bacteria;Fusobacteria;Fusobacteriia;Fusobacteriales;unclassified	1.62037e-06	0	0	0	1.40282e-05	0	0	0	0	0
0.1.36.1.1.2	Bacteria;Gemmatimonadetes;Gemmatimonadetes;AT425-EubC11_terrestrial_group;uncultured_Gemmatimonadetes_bacterium	1.62037e-06	0	0	0	0	0	0	9.30293e-06	0	0
0.1.36.1.1.8	Bacteria;Gemmatimonadetes;Gemmatimonadetes;AT425-EubC11_terrestrial_group;uncultured_soil_bacterium	1.62037e-06	0	2.18403e-05	0	0	0	0	0	0	0
0.1.36.1.2.6	Bacteria;Gemmatimonadetes;Gemmatimonadetes;BD2-11_terrestrial_group;uncultured_Gemmatimonadales_bacterium	1.62037e-06	0	0	0	0	1.26563e-05	0	0	0	0
0.1.36.1.4.4	Bacteria;Gemmatimonadetes;Gemmatimonadetes;Kazan-1B-37;uncultured_proteobacterium	1.62037e-06	0	0	0	0	1.26563e-05	0	0	0	0
0.1.35.5.1.1	Bacteria;GOUTA4;uncultured_bacterium;unclassified;unclassified	1.62037e-06	0	2.18403e-05	0	0	0	0	0	0	0
0.1.40.7.1.1	Bacteria;Lentisphaerae;DEV055;unclassified;unclassified	1.62037e-06	0	2.18403e-05	0	0	0	0	0	0	0
0.1.40.11.4.1	Bacteria;Lentisphaerae;LD1-PB3;uncultured_bacterium;unclassified	1.62037e-06	1.92141e-05	0	0	0	0	0	0	0	0
0.1.40.12.3.1	Bacteria;Lentisphaerae;Lentisphaeria;unclassified;unclassified	1.62037e-06	1.92141e-05	0	0	0	0	0	0	0	0
0.1.40.17.1.1	Bacteria;Lentisphaerae;PBS-III-20;unclassified;unclassified	1.62037e-06	0	2.18403e-05	0	0	0	0	0	0	0
0.1.40.19.6.1	Bacteria;Lentisphaerae;RFP12_gut_group;uncultured_bacterium;unclassified	1.62037e-06	0	2.18403e-05	0	0	0	0	0	0	0
0.1.42.1.1.11	Bacteria;Nitrospirae;Nitrospira;Nitrospirales;wb1-A12	1.62037e-06	0	0	0	0	0	0	9.30293e-06	0	0
0.1.41.5.1.1	Bacteria;NPL-UPA2;uncultured_Verrucomicrobia_bacterium;unclassified;unclassified	1.62037e-06	0	0	0	1.40282e-05	0	0	0	0	0
0.1.44.6.1.1	Bacteria;Planctomycetes;OM190;planctomycete_A-2;unclassified	1.62037e-06	0	2.18403e-05	0	0	0	0	0	0	0
0.1.44.6.10.1	Bacteria;Planctomycetes;OM190;uncultured_microorganism;unclassified	1.62037e-06	0	2.18403e-05	0	0	0	0	0	0	0
0.1.44.7.5.4	Bacteria;Planctomycetes;Phycisphaerae;CCM11a;uncultured_Planctomycetales_bacterium	1.62037e-06	0	2.18403e-05	0	0	0	0	0	0	0
0.1.44.7.5.9	Bacteria;Planctomycetes;Phycisphaerae;CCM11a;uncultured_planctomycete	1.62037e-06	0	0	0	0	0	0	0	1.08752e-05	0
0.1.44.7.6.4	Bacteria;Planctomycetes;Phycisphaerae;CPla-3_termite_group;uncultured_soil_bacterium_PBS-22	1.62037e-06	1.92141e-05	0	0	0	0	0	0	0	0
0.1.44.7.8.2	Bacteria;Planctomycetes;Phycisphaerae;ML-A-10;unclassified	1.62037e-06	0	0	0	0	0	0	9.30293e-06	0	0
0.1.44.7.18.4	Bacteria;Planctomycetes;Phycisphaerae;mle1-8;uncultured_Schlesneria_sp.	1.62037e-06	0	0	0	0	0	0	0	1.08752e-05	0
0.1.44.7.10.2	Bacteria;Planctomycetes;Phycisphaerae;MSBL9;unclassified	1.62037e-06	0	0	0	0	1.26563e-05	0	0	0	0
0.1.44.7.14.5	Bacteria;Planctomycetes;Phycisphaerae;S-70;uncultured_planctomycete	1.62037e-06	1.92141e-05	0	0	0	0	0	0	0	0
0.1.44.7.17.10	Bacteria;Planctomycetes;Phycisphaerae;WD2101_soil_group;uncultured_Planctomycetales_bacterium	1.62037e-06	0	0	0	0	0	0	0	1.08752e-05	0
0.1.44.7.17.17	Bacteria;Planctomycetes;Phycisphaerae;WD2101_soil_group;uncultured_soil_bacterium	1.62037e-06	0	2.18403e-05	0	0	0	0	0	0	0
0.1.44.8.6.1	Bacteria;Planctomycetes;Pla3_lineage;uncultured_planctomycete;unclassified	1.62037e-06	1.92141e-05	0	0	0	0	0	0	0	0
0.1.45.1.5.1	Bacteria;Proteobacteria;AEGEAN-245;uncultured_gamma_proteobacterium;unclassified	1.62037e-06	0	0	0	0	0	0	0	1.08752e-05	0
0.1.45.4.1.2	Bacteria;Proteobacteria;Alphaproteobacteria;4-Org1-14;unclassified	1.62037e-06	0	0	0	0	1.26563e-05	0	0	0	0
0.1.45.4.1.5	Bacteria;Proteobacteria;Alphaproteobacteria;4-Org1-14;uncultured_alpha_proteobacterium	1.62037e-06	0	0	0	0	1.26563e-05	0	0	0	0
0.1.45.4.6.6	Bacteria;Proteobacteria;Alphaproteobacteria;DB1-14;uncultured_Rhizobiales_bacterium	1.62037e-06	1.92141e-05	0	0	0	0	0	0	0	0
0.1.45.4.8.3	Bacteria;Proteobacteria;Alphaproteobacteria;E6aD10;unclassified	1.62037e-06	0	0	0	0	0	1.35448e-05	0	0	0
0.1.45.4.10.1	Bacteria;Proteobacteria;Alphaproteobacteria;Magnetococcales;Magnetococcaceae	1.62037e-06	1.92141e-05	0	0	0	0	0	0	0	0
0.1.45.4.11.22	Bacteria;Proteobacteria;Alphaproteobacteria;OCS116_clade;uncultured_bacterium	1.62037e-06	0	0	0	0	1.26563e-05	0	0	0	0
0.1.45.4.13.7	Bacteria;Proteobacteria;Alphaproteobacteria;Rhizobiales;Bartonellaceae	1.62037e-06	1.92141e-05	0	0	0	0	0	0	0	0
0.1.45.4.13.12	Bacteria;Proteobacteria;Alphaproteobacteria;Rhizobiales;D05-2	1.62037e-06	0	0	6.64187e-05	0	0	0	0	0	0
0.1.45.4.13.13	Bacteria;Proteobacteria;Alphaproteobacteria;Rhizobiales;DUNssu044	1.62037e-06	0	0	0	0	0	0	0	0	1.23942e-05
0.1.45.4.13.17	Bacteria;Proteobacteria;Alphaproteobacteria;Rhizobiales;FFCH5858	1.62037e-06	0	0	0	0	1.26563e-05	0	0	0	0
0.1.45.4.13.37	Bacteria;Proteobacteria;Alphaproteobacteria;Rhizobiales;uncultured	1.62037e-06	0	0	0	0	0	1.35448e-05	0	0	0
0.1.45.4.15.9	Bacteria;Proteobacteria;Alphaproteobacteria;Rhodospirillales;KCM-B-15	1.62037e-06	1.92141e-05	0	0	0	0	0	0	0	0
0.1.45.4.17.2	Bacteria;Proteobacteria;Alphaproteobacteria;S26-47;uncultured_alpha_proteobacterium	1.62037e-06	0	0	0	0	0	0	9.30293e-06	0	0
0.1.45.4.21.7	Bacteria;Proteobacteria;Alphaproteobacteria;Sphingomonadales;Ellin6055	1.62037e-06	0	2.18403e-05	0	0	0	0	0	0	0
0.1.45.4.21.20	Bacteria;Proteobacteria;Alphaproteobacteria;Sphingomonadales;WW2-159	1.62037e-06	0	2.18403e-05	0	0	0	0	0	0	0
0.1.45.6.3.4	Bacteria;Proteobacteria;Betaproteobacteria;B1-7BS;uncultured_beta_proteobacterium	1.62037e-06	1.92141e-05	0	0	0	0	0	0	0	0
0.1.45.6.8.2	Bacteria;Proteobacteria;Betaproteobacteria;Hot_Creek_32;unclassified	1.62037e-06	0	0	0	0	0	0	0	1.08752e-05	0
0.1.45.6.15.29	Bacteria;Proteobacteria;Betaproteobacteria;SC-I-84;uncultured_soil_bacterium	1.62037e-06	0	2.18403e-05	0	0	0	0	0	0	0
0.1.45.6.16.24	Bacteria;Proteobacteria;Betaproteobacteria;TRA3-20;uncultured_soil_bacterium	1.62037e-06	0	2.18403e-05	0	0	0	0	0	0	0
0.1.45.7.5.2	Bacteria;Proteobacteria;Deltaproteobacteria;DTB120;unclassified	1.62037e-06	0	0	0	0	0	0	0	1.08752e-05	0
0.1.45.7.13.7	Bacteria;Proteobacteria;Deltaproteobacteria;GR-WP33-30;uncultured_Acidobacteriales_bacterium	1.62037e-06	0	2.18403e-05	0	0	0	0	0	0	0
0.1.45.7.13.15	Bacteria;Proteobacteria;Deltaproteobacteria;GR-WP33-30;uncultured_Syntrophobacteraceae_bacterium	1.62037e-06	0	0	0	1.40282e-05	0	0	0	0	0
0.1.45.7.14.20	Bacteria;Proteobacteria;Deltaproteobacteria;Myxococcales;uncultured_bacterium	1.62037e-06	0	2.18403e-05	0	0	0	0	0	0	0
0.1.45.7.15.1	Bacteria;Proteobacteria;Deltaproteobacteria;Rs-K70_termite_group;unclassified	1.62037e-06	1.92141e-05	0	0	0	0	0	0	0	0
0.1.45.7.18.19	Bacteria;Proteobacteria;Deltaproteobacteria;Sh765B-TzT-29;uncultured_candidate_division_SBR1093_bacterium	1.62037e-06	1.92141e-05	0	0	0	0	0	0	0	0
0.1.45.7.18.11	Bacteria;Proteobacteria;Deltaproteobacteria;Sh765B-TzT-29;uncultured_Nitrospirae_bacterium	1.62037e-06	0	2.18403e-05	0	0	0	0	0	0	0
0.1.45.7.18.27	Bacteria;Proteobacteria;Deltaproteobacteria;Sh765B-TzT-29;uncultured_proteobacterium	1.62037e-06	0	0	0	0	0	0	0	0	1.23942e-05
0.1.45.7.19.1	Bacteria;Proteobacteria;Deltaproteobacteria;Sva0485;unclassified	1.62037e-06	1.92141e-05	0	0	0	0	0	0	0	0
0.1.45.7.20.2	Bacteria;Proteobacteria;Deltaproteobacteria;Syntrophobacterales;Syntrophobacteraceae	1.62037e-06	1.92141e-05	0	0	0	0	0	0	0	0
0.1.45.11.1.5	Bacteria;Proteobacteria;Gammaproteobacteria;1013-28-CG33;uncultured_soil_bacterium	1.62037e-06	0	0	0	0	0	0	0	1.08752e-05	0
0.1.45.11.7.3	Bacteria;Proteobacteria;Gammaproteobacteria;Alteromonadales;Colwelliaceae	1.62037e-06	0	0	0	0	0	1.35448e-05	0	0	0
0.1.45.11.7.11	Bacteria;Proteobacteria;Gammaproteobacteria;Alteromonadales;unclassified	1.62037e-06	0	0	0	0	1.26563e-05	0	0	0	0
0.1.45.11.9.3	Bacteria;Proteobacteria;Gammaproteobacteria;B38;primary_endosymbiont_of_Liposcelis_decolor_(host_pop._HNZZ)	1.62037e-06	0	2.18403e-05	0	0	0	0	0	0	0
0.1.45.11.18.3	Bacteria;Proteobacteria;Gammaproteobacteria;Chromatiales;Granulosicoccaceae	1.62037e-06	0	2.18403e-05	0	0	0	0	0	0	0
0.1.45.11.21.3	Bacteria;Proteobacteria;Gammaproteobacteria;EC3;uncultured_bacterium	1.62037e-06	0	0	0	1.40282e-05	0	0	0	0	0
0.1.45.11.29.12	Bacteria;Proteobacteria;Gammaproteobacteria;KI89A_clade;uncultured_soil_bacterium	1.62037e-06	0	0	0	1.40282e-05	0	0	0	0	0
0.1.45.11.33.11	Bacteria;Proteobacteria;Gammaproteobacteria;Methylococcales;pItb-vmat-59	1.62037e-06	0	0	0	0	1.26563e-05	0	0	0	0
0.1.45.11.34.1	Bacteria;Proteobacteria;Gammaproteobacteria;NKB5;Legionella-like_amoebal_pathogen_CC99	1.62037e-06	0	2.18403e-05	0	0	0	0	0	0	0
0.1.45.11.36.19	Bacteria;Proteobacteria;Gammaproteobacteria;Oceanospirillales;OM182_clade	1.62037e-06	0	0	0	0	1.26563e-05	0	0	0	0
0.1.45.11.39.4	Bacteria;Proteobacteria;Gammaproteobacteria;P131-4;Sodalis_sp._HS1	1.62037e-06	1.92141e-05	0	0	0	0	0	0	0	0
0.1.45.11.42.1	Bacteria;Proteobacteria;Gammaproteobacteria;Pasteurellales;Pasteurellaceae	1.62037e-06	0	0	6.64187e-05	0	0	0	0	0	0
0.1.45.18.2.1	Bacteria;Proteobacteria;SPOTSOCT00m83;uncultured_bacterium;unclassified	1.62037e-06	0	2.18403e-05	0	0	0	0	0	0	0
0.1.45.20.11.1	Bacteria;Proteobacteria;TA18;uncultured_bacterium_PHOS-HD29;unclassified	1.62037e-06	0	0	0	0	0	0	0	0	1.23942e-05
0.1.50.5.1.1	Bacteria;SM2F11;uncultured_delta_proteobacterium;unclassified;unclassified	1.62037e-06	0	0	0	0	0	0	0	0	1.23942e-05
0.1.50.2.1.1	Bacteria;SM2F11;uncultured_Parcubacteria_bacterium;unclassified;unclassified	1.62037e-06	0	0	0	0	0	0	0	1.08752e-05	0
0.1.51.1.5.3	Bacteria;Spirochaetae;Spirochaetes;Kazan-3B-09;uncultured_bacterium	1.62037e-06	0	0	0	0	0	0	0	0	1.23942e-05
0.1.51.1.14.2	Bacteria;Spirochaetae;Spirochaetes;Spirochaetales;Brevinemataceae	1.62037e-06	1.92141e-05	0	0	0	0	0	0	0	0
0.1.51.1.14.8	Bacteria;Spirochaetae;Spirochaetes;Spirochaetales;V2072-189E03	1.62037e-06	0	0	0	0	1.26563e-05	0	0	0	0
0.1.54.21.1.1	Bacteria;TM6;uncultured_prokaryote;unclassified;unclassified	1.62037e-06	0	0	0	0	0	0	0	1.08752e-05	0
0.1.58.2.26.1	Bacteria;Verrucomicrobia;OPB35_soil_group;uncultured_Verrucomicrobia_subdivision_3_bacterium;unclassified	1.62037e-06	1.92141e-05	0	0	0	0	0	0	0	0
0.1.58.2.2.1	Bacteria;Verrucomicrobia;OPB35_soil_group;Unknown_Order;Unknown_Family	1.62037e-06	1.92141e-05	0	0	0	0	0	0	0	0
0.1.58.4.1.1	Bacteria;Verrucomicrobia;S-BQ2-57_soil_group;unclassified;unclassified	1.62037e-06	0	2.18403e-05	0	0	0	0	0	0	0
0.1.58.4.2.1	Bacteria;Verrucomicrobia;S-BQ2-57_soil_group;uncultured_Verrucomicrobia_bacterium;unclassified	1.62037e-06	0	2.18403e-05	0	0	0	0	0	0	0
0.1.58.5.1.1	Bacteria;Verrucomicrobia;Spartobacteria;Chthoniobacterales;01D2Z36	1.62037e-06	0	2.18403e-05	0	0	0	0	0	0	0
0.1.58.6.3.1	Bacteria;Verrucomicrobia;UA11;uncultured_soil_bacterium;unclassified	1.62037e-06	1.92141e-05	0	0	0	0	0	0	0	0
0.1.58.10.1.1	Bacteria;Verrucomicrobia;uncultured_bacterium;unclassified;unclassified	1.62037e-06	0	2.18403e-05	0	0	0	0	0	0	0
0.1.60.1.1.1	Bacteria;WD272;unclassified;unclassified;unclassified	1.62037e-06	0	0	0	0	1.26563e-05	0	0	0	0
0.1.60.2.1.1	Bacteria;WD272;uncultured_Acidobacteria_bacterium;unclassified;unclassified	1.62037e-06	0	2.18403e-05	0	0	0	0	0	0	0
0.1.1.1.10.5	Bacteria;Acidobacteria;Acidobacteria;Subgroup_17;uncultured_Acidobacterium_sp.	0	0	0	0	0	0	0	0	0	0
0.1.1.1.11.6	Bacteria;Acidobacteria;Acidobacteria;Subgroup_18;uncultured_soil_bacterium	0	0	0	0	0	0	0	0	0	0
0.1.1.1.13.10	Bacteria;Acidobacteria;Acidobacteria;Subgroup_2;uncultured_Holophaga_sp.	0	0	0	0	0	0	0	0	0	0
0.1.1.1.20.34	Bacteria;Acidobacteria;Acidobacteria;Subgroup_6;uncultured_bacterium_259	0	0	0	0	0	0	0	0	0	0
0.1.1.1.20.58	Bacteria;Acidobacteria;Acidobacteria;Subgroup_6;uncultured_microorganism	0	0	0	0	0	0	0	0	0	0
0.1.1.2.9.2	Bacteria;Acidobacteria;Holophagae;Subgroup_7;freshwater_sediment_metagenome	0	0	0	0	0	0	0	0	0	0
0.1.2.1.1.9	Bacteria;Actinobacteria;Acidimicrobiia;Acidimicrobiales;uncultured_bacterium	0	0	0	0	0	0	0	0	0	0
0.1.2.2.1.1	Bacteria;Actinobacteria;Actinobacteria;Actinomycetales;Actinomycetaceae	0	0	0	0	0	0	0	0	0	0
0.1.2.2.4.1	Bacteria;Actinobacteria;Actinobacteria;Bifidobacteriales;Bifidobacteriaceae	0	0	0	0	0	0	0	0	0	0
0.1.2.2.8.1	Bacteria;Actinobacteria;Actinobacteria;Frankiales;Acidothermaceae	0	0	0	0	0	0	0	0	0	0
0.1.2.2.8.3	Bacteria;Actinobacteria;Actinobacteria;Frankiales;Frankiaceae	0	0	0	0	0	0	0	0	0	0
0.1.2.2.11.1	Bacteria;Actinobacteria;Actinobacteria;Micrococcales;AKAU3644	0	0	0	0	0	0	0	0	0	0
0.1.2.2.11.5	Bacteria;Actinobacteria;Actinobacteria;Micrococcales;Cellulomonadaceae	0	0	0	0	0	0	0	0	0	0
0.1.2.2.11.9	Bacteria;Actinobacteria;Actinobacteria;Micrococcales;Dermabacteraceae	0	0	0	0	0	0	0	0	0	0
0.1.2.2.11.14	Bacteria;Actinobacteria;Actinobacteria;Micrococcales;Jonesiaceae	0	0	0	0	0	0	0	0	0	0
0.1.2.2.13.9	Bacteria;Actinobacteria;Actinobacteria;PeM15;uncultured_bacterium	0	0	0	0	0	0	0	0	0	0
0.1.2.2.17.1	Bacteria;Actinobacteria;Actinobacteria;Streptomycetales;Streptomycetaceae	0	0	0	0	0	0	0	0	0	0
0.1.2.6.10.1	Bacteria;Actinobacteria;MB-A2-108;uncultured_actinobacterium;unclassified	0	0	0	0	0	0	0	0	0	0
0.1.2.7.2.1	Bacteria;Actinobacteria;Nitriliruptoria;Nitriliruptorales;Nitriliruptoraceae	0	0	0	0	0	0	0	0	0	0
0.1.2.8.2.1	Bacteria;Actinobacteria;OPB41;uncultured_actinobacterium;unclassified	0	0	0	0	0	0	0	0	0	0
0.1.2.11.2.2	Bacteria;Actinobacteria;Thermoleophilia;Solirubrobacterales;288-2	0	0	0	0	0	0	0	0	0	0
0.1.3.1.1.3	Bacteria;Aquificae;Aquificae;Aquificales;Desulfurobacteriaceae	0	0	0	0	0	0	0	0	0	0
0.1.3.1.1.4	Bacteria;Aquificae;Aquificae;Aquificales;Hydrogenothermaceae	0	0	0	0	0	0	0	0	0	0
0.1.7.4.1.15	Bacteria;Bacteroidetes;Bacteroidia;Bacteroidales;MgMjR-022	0	0	0	0	0	0	0	0	0	0
0.1.7.4.1.26	Bacteria;Bacteroidetes;Bacteroidia;Bacteroidales;p-2534-18B5_gut_group	0	0	0	0	0	0	0	0	0	0
0.1.7.1.1.1	Bacteria;Bacteroidetes;BD2-2;unclassified;unclassified	0	0	0	0	0	0	0	0	0	0
0.1.7.1.16.1	Bacteria;Bacteroidetes;BD2-2;uncultured_soil_bacterium;unclassified	0	0	0	0	0	0	0	0	0	0
0.1.7.5.3.4	Bacteria;Bacteroidetes;Cytophagia;Order_III;CK06-06-Mud-MAS4B-21	0	0	0	0	0	0	0	0	0	0
0.1.7.5.3.10	Bacteria;Bacteroidetes;Cytophagia;Order_III;unclassified	0	0	0	0	0	0	0	0	0	0
0.1.7.9.15.1	Bacteria;Bacteroidetes;SB-1;uncultured_bacterium;unclassified	0	0	0	0	0	0	0	0	0	0
0.1.7.13.1.2	Bacteria;Bacteroidetes;Sphingobacteriia;Sphingobacteriales;B01R012	0	0	0	0	0	0	0	0	0	0
0.1.7.17.7.1	Bacteria;Bacteroidetes;vadinHA17;uncultured_Bacteroidetes_bacterium;unclassified	0	0	0	0	0	0	0	0	0	0
0.1.9.1.1.2	Bacteria;Caldiserica;Caldisericia;Caldisericales;Caldisericaceae	0	0	0	0	0	0	0	0	0	0
0.1.9.1.1.6	Bacteria;Caldiserica;Caldisericia;Caldisericales;WCHB1-02	0	0	0	0	0	0	0	0	0	0
0.1.10.7.1.1	Bacteria;Candidate_division_BRC1;uncultured_Desulfocaldus_sp.;unclassified;unclassified	0	0	0	0	0	0	0	0	0	0
0.1.15.5.1.1	Bacteria;Candidate_division_OP3;uncultured_Clostridiales_bacterium;unclassified;unclassified	0	0	0	0	0	0	0	0	0	0
0.1.16.3.1.1	Bacteria;Candidate_division_OP8;unclassified;unclassified;unclassified	0	0	0	0	0	0	0	0	0	0
0.1.16.6.1.1	Bacteria;Candidate_division_OP8;uncultured_bacterium;unclassified;unclassified	0	0	0	0	0	0	0	0	0	0
0.1.17.5.1.1	Bacteria;Candidate_division_OP9;uncultured_bacterium;unclassified;unclassified	0	0	0	0	0	0	0	0	0	0
0.1.20.29.1.1	Bacteria;Candidate_division_WS3;uncultured_soil_bacterium_PBS-II-5;unclassified;unclassified	0	0	0	0	0	0	0	0	0	0
0.1.20.4.1.1	Bacteria;Candidate_division_WS3;Unknown_Class;Unknown_Order;Unknown_Family	0	0	0	0	0	0	0	0	0	0
0.1.23.1.1.1	Bacteria;Chlorobi;Chlorobia;Chlorobiales;Chlorobiaceae	0	0	0	0	0	0	0	0	0	0
0.1.23.2.1.6	Bacteria;Chlorobi;Ignavibacteria;Ignavibacteriales;IheB3-7	0	0	0	0	0	0	0	0	0	0
0.1.24.2.3.4	Bacteria;Chloroflexi;Ardenticatenia;uncultured;uncultured_Caldilineaceae_bacterium	0	0	0	0	0	0	0	0	0	0
0.1.24.5.1.8	Bacteria;Chloroflexi;Chloroflexia;AKIW781;uncultured_soil_bacterium	0	0	0	0	0	0	0	0	0	0
0.1.24.6.4.5	Bacteria;Chloroflexi;Dehalococcoidia;GIF3;uncultured_bacterium	0	0	0	0	0	0	0	0	0	0
0.1.24.6.5.4	Bacteria;Chloroflexi;Dehalococcoidia;GIF9;uncultured_bacterium	0	0	0	0	0	0	0	0	0	0
0.1.24.6.6.1	Bacteria;Chloroflexi;Dehalococcoidia;MSBL5;unclassified	0	0	0	0	0	0	0	0	0	0
0.1.24.6.8.5	Bacteria;Chloroflexi;Dehalococcoidia;Sh765B-AG-111;uncultured_bacterium	0	0	0	0	0	0	0	0	0	0
0.1.24.6.9.1	Bacteria;Chloroflexi;Dehalococcoidia;unclassified;unclassified	0	0	0	0	0	0	0	0	0	0
0.1.24.6.12.8	Bacteria;Chloroflexi;Dehalococcoidia;vadinBA26;uncultured_bacterium	0	0	0	0	0	0	0	0	0	0
0.1.24.13.3.1	Bacteria;Chloroflexi;Ktedonobacteria;C0119;unclassified	0	0	0	0	0	0	0	0	0	0
0.1.24.13.3.5	Bacteria;Chloroflexi;Ktedonobacteria;C0119;uncultured_soil_bacterium	0	0	0	0	0	0	0	0	0	0
0.1.24.18.6.1	Bacteria;Chloroflexi;SHA-26;uncultured_Dehalogenimonas_sp.;unclassified	0	0	0	0	0	0	0	0	0	0
0.1.24.18.8.1	Bacteria;Chloroflexi;SHA-26;uncultured_soil_bacterium;unclassified	0	0	0	0	0	0	0	0	0	0
0.1.24.21.2.8	Bacteria;Chloroflexi;Thermomicrobia;JG30-KF-CM45;uncultured_endolithic_bacterium	0	0	0	0	0	0	0	0	0	0
0.1.24.23.1.1	Bacteria;Chloroflexi;uncultured;Dehalococcoides_sp._BHI80-15;unclassified	0	0	0	0	0	0	0	0	0	0
0.1.26.4.2.1	Bacteria;Cyanobacteria;Melainabacteria;Gastranaerophilales;Acinetobacter_sp._CAG:196	0	0	0	0	0	0	0	0	0	0
0.1.26.4.2.2	Bacteria;Cyanobacteria;Melainabacteria;Gastranaerophilales;Clostridium_sp._CAG:306	0	0	0	0	0	0	0	0	0	0
0.1.26.4.2.11	Bacteria;Cyanobacteria;Melainabacteria;Gastranaerophilales;uncultured_rumen_bacterium	0	0	0	0	0	0	0	0	0	0
0.1.26.3.4.1	Bacteria;Cyanobacteria;ML635J-21;uncultured_Gram-positive_bacterium;unclassified	0	0	0	0	0	0	0	0	0	0
0.1.30.1.2.1	Bacteria;Elusimicrobia;Elusimicrobia;Elusimicrobiales;Elusimicrobiaceae	0	0	0	0	0	0	0	0	0	0
0.1.30.1.8.2	Bacteria;Elusimicrobia;Elusimicrobia;Lineage_I_(Endomicrobia);unclassified	0	0	0	0	0	0	0	0	0	0
0.1.30.1.11.1	Bacteria;Elusimicrobia;Elusimicrobia;Rs-M47;unclassified	0	0	0	0	0	0	0	0	0	0
0.1.31.1.1.1	Bacteria;Fibrobacteres;Fibrobacteria;Fibrobacterales;09D2Z46	0	0	0	0	0	0	0	0	0	0
0.1.31.1.1.7	Bacteria;Fibrobacteres;Fibrobacteria;Fibrobacterales;MAT-CR-H6-H10	0	0	0	0	0	0	0	0	0	0
0.1.32.1.2.1	Bacteria;Firmicutes;Bacilli;Bacillales;Alicyclobacillaceae	0	0	0	0	0	0	0	0	0	0
0.1.32.2.1.1	Bacteria;Firmicutes;Clostridia;Clostridia_Incertae_Sedis;Unknown_Family	0	0	0	0	0	0	0	0	0	0
0.1.32.2.2.10	Bacteria;Firmicutes;Clostridia;Clostridiales;Eubacteriaceae	0	0	0	0	0	0	0	0	0	0
0.1.32.2.2.21	Bacteria;Firmicutes;Clostridia;Clostridiales;JTB215	0	0	0	0	0	0	0	0	0	0
0.1.32.4.1.3	Bacteria;Firmicutes;Negativicutes;Selenomonadales;unclassified	0	0	0	0	0	0	0	0	0	0
0.1.32.5.4.1	Bacteria;Firmicutes;OPB54;unclassified;unclassified	0	0	0	0	0	0	0	0	0	0
0.1.33.1.1.4	Bacteria;Fusobacteria;Fusobacteriia;Fusobacteriales;Hados.Sed.Eubac.3	0	0	0	0	0	0	0	0	0	0
0.1.36.1.2.9	Bacteria;Gemmatimonadetes;Gemmatimonadetes;BD2-11_terrestrial_group;uncultured_Gemmatimonadetes_bacterium	0	0	0	0	0	0	0	0	0	0
0.1.36.1.6.3	Bacteria;Gemmatimonadetes;Gemmatimonadetes;S0134_terrestrial_group;uncultured_Gemmatimonadetes_bacterium	0	0	0	0	0	0	0	0	0	0
0.1.40.4.4.1	Bacteria;Lentisphaerae;BS5;uncultured_bacterium;unclassified	0	0	0	0	0	0	0	0	0	0
0.1.40.15.1.1	Bacteria;Lentisphaerae;MSBL3;unclassified;unclassified	0	0	0	0	0	0	0	0	0	0
0.1.40.16.3.2	Bacteria;Lentisphaerae;Oligosphaeria;Oligosphaerales;Oligosphaeraceae	0	0	0	0	0	0	0	0	0	0
0.1.40.16.3.3	Bacteria;Lentisphaerae;Oligosphaeria;Oligosphaerales;unclassified	0	0	0	0	0	0	0	0	0	0
0.1.40.16.3.6	Bacteria;Lentisphaerae;Oligosphaeria;Oligosphaerales;uncultured_bacterium	0	0	0	0	0	0	0	0	0	0
0.1.40.16.3.5	Bacteria;Lentisphaerae;Oligosphaeria;Oligosphaerales;uncultured_Verrucomicrobia_bacterium	0	0	0	0	0	0	0	0	0	0
0.1.40.16.8.1	Bacteria;Lentisphaerae;Oligosphaeria;uncultured_bacterium;unclassified	0	0	0	0	0	0	0	0	0	0
0.1.40.16.7.1	Bacteria;Lentisphaerae;Oligosphaeria;uncultured_Verrucomicrobia_bacterium;unclassified	0	0	0	0	0	0	0	0	0	0
0.1.40.19.1.1	Bacteria;Lentisphaerae;RFP12_gut_group;bacterium_enrichment_culture_clone_JCA3;unclassified	0	0	0	0	0	0	0	0	0	0
0.1.40.19.3.1	Bacteria;Lentisphaerae;RFP12_gut_group;unclassified;unclassified	0	0	0	0	0	0	0	0	0	0
0.1.40.19.4.1	Bacteria;Lentisphaerae;RFP12_gut_group;uncultured_Verrucomicrobia_bacterium;unclassified	0	0	0	0	0	0	0	0	0	0
0.1.40.22.4.1	Bacteria;Lentisphaerae;WCHB1-25;uncultured_bacterium;unclassified	0	0	0	0	0	0	0	0	0	0
0.1.41.6.1.1	Bacteria;NPL-UPA2;uncultured_anaerobic_bacterium;unclassified;unclassified	0	0	0	0	0	0	0	0	0	0
0.1.44.6.5.1	Bacteria;Planctomycetes;OM190;uncultured_Planctomycetaceae_bacterium;unclassified	0	0	0	0	0	0	0	0	0	0
0.1.44.7.7.2	Bacteria;Planctomycetes;Phycisphaerae;KCLunmb-38-53;uncultured_bacterium	0	0	0	0	0	0	0	0	0	0
0.1.44.7.10.5	Bacteria;Planctomycetes;Phycisphaerae;MSBL9;uncultured_bacterium	0	0	0	0	0	0	0	0	0	0
0.1.44.7.12.7	Bacteria;Planctomycetes;Phycisphaerae;Phycisphaerales;Sva0503	0	0	0	0	0	0	0	0	0	0
0.1.44.7.15.2	Bacteria;Planctomycetes;Phycisphaerae;S15A-MN16;uncultured_Planctomycetaceae_bacterium	0	0	0	0	0	0	0	0	0	0
0.1.44.7.16.7	Bacteria;Planctomycetes;Phycisphaerae;SHA-43;uncultured_planctomycete	0	0	0	0	0	0	0	0	0	0
0.1.44.14.11.1	Bacteria;Planctomycetes;vadinHA49;uncultured_organism;unclassified	0	0	0	0	0	0	0	0	0	0
0.1.44.14.15.1	Bacteria;Planctomycetes;vadinHA49;wastewater_metagenome;unclassified	0	0	0	0	0	0	0	0	0	0
0.1.45.4.13.10	Bacteria;Proteobacteria;Alphaproteobacteria;Rhizobiales;Brucellaceae	0	0	0	0	0	0	0	0	0	0
0.1.45.4.13.14	Bacteria;Proteobacteria;Alphaproteobacteria;Rhizobiales;DUNssu371	0	0	0	0	0	0	0	0	0	0
0.1.45.4.15.2	Bacteria;Proteobacteria;Alphaproteobacteria;Rhodospirillales;AT-s3-44	0	0	0	0	0	0	0	0	0	0
0.1.45.4.21.14	Bacteria;Proteobacteria;Alphaproteobacteria;Sphingomonadales;Plot4-2H12	0	0	0	0	0	0	0	0	0	0
0.1.45.6.3.2	Bacteria;Proteobacteria;Betaproteobacteria;B1-7BS;uncultured_Denitratisoma_sp.	0	0	0	0	0	0	0	0	0	0
0.1.45.6.4.1	Bacteria;Proteobacteria;Betaproteobacteria;Betaproteobacteria_Incertae_Sedis;Unknown_Family	0	0	0	0	0	0	0	0	0	0
0.1.45.6.5.3	Bacteria;Proteobacteria;Betaproteobacteria;Burkholderiales;Burkholderiales_Incertae_Sedis	0	0	0	0	0	0	0	0	0	0
0.1.45.6.19.3	Bacteria;Proteobacteria;Betaproteobacteria;oca12;uncultured_bacterium	0	0	0	0	0	0	0	0	0	0
0.1.45.6.15.21	Bacteria;Proteobacteria;Betaproteobacteria;SC-I-84;uncultured_beta_proteobacterium	0	0	0	0	0	0	0	0	0	0
0.1.45.6.15.13	Bacteria;Proteobacteria;Betaproteobacteria;SC-I-84;uncultured_Burkholderia_sp.	0	0	0	0	0	0	0	0	0	0
0.1.45.6.15.17	Bacteria;Proteobacteria;Betaproteobacteria;SC-I-84;uncultured_Nitrosomonadaceae_bacterium	0	0	0	0	0	0	0	0	0	0
0.1.45.6.15.18	Bacteria;Proteobacteria;Betaproteobacteria;SC-I-84;uncultured_Rhodocyclaceae_bacterium	0	0	0	0	0	0	0	0	0	0
0.1.45.7.2.3	Bacteria;Proteobacteria;Deltaproteobacteria;43F-1404R;uncultured_Geobacter_sp.	0	0	0	0	0	0	0	0	0	0
0.1.45.7.2.9	Bacteria;Proteobacteria;Deltaproteobacteria;43F-1404R;uncultured_prokaryote	0	0	0	0	0	0	0	0	0	0
0.1.45.7.6.1	Bacteria;Proteobacteria;Deltaproteobacteria;Deltaproteobacteria_Incertae_Sedis;Syntrophorhabdaceae	0	0	0	0	0	0	0	0	0	0
0.1.45.7.9.5	Bacteria;Proteobacteria;Deltaproteobacteria;Desulfovibrionales;unclassified	0	0	0	0	0	0	0	0	0	0
0.1.45.7.11.16	Bacteria;Proteobacteria;Deltaproteobacteria;Desulfuromonadales;MA-28-I98C	0	0	0	0	0	0	0	0	0	0
0.1.45.7.13.3	Bacteria;Proteobacteria;Deltaproteobacteria;GR-WP33-30;delta_proteobacterium_WX152	0	0	0	0	0	0	0	0	0	0
0.1.45.7.16.1	Bacteria;Proteobacteria;Deltaproteobacteria;SAR324_clade(Marine_group_B);Candidatus_Nitrosoarchaeum_limnia_SFB1	0	0	0	0	0	0	0	0	0	0
0.1.45.7.18.14	Bacteria;Proteobacteria;Deltaproteobacteria;Sh765B-TzT-29;uncultured_bacterium	0	0	0	0	0	0	0	0	0	0
0.1.45.7.18.10	Bacteria;Proteobacteria;Deltaproteobacteria;Sh765B-TzT-29;uncultured_Myxococcales_bacterium	0	0	0	0	0	0	0	0	0	0
0.1.45.7.18.29	Bacteria;Proteobacteria;Deltaproteobacteria;Sh765B-TzT-29;uncultured_soil_bacterium	0	0	0	0	0	0	0	0	0	0
0.1.45.9.5.1	Bacteria;Proteobacteria;Epsilonproteobacteria;Nautiliales;Nautiliaceae	0	0	0	0	0	0	0	0	0	0
0.1.45.11.3.4	Bacteria;Proteobacteria;Gammaproteobacteria;34P16;uncultured_Pseudomonadales_bacterium	0	0	0	0	0	0	0	0	0	0
0.1.45.11.5.2	Bacteria;Proteobacteria;Gammaproteobacteria;Aeromonadales;JI49D030	0	0	0	0	0	0	0	0	0	0
0.1.45.11.5.4	Bacteria;Proteobacteria;Gammaproteobacteria;Aeromonadales;Succinivibrionaceae	0	0	0	0	0	0	0	0	0	0
0.1.45.11.7.5	Bacteria;Proteobacteria;Gammaproteobacteria;Alteromonadales;Idiomarinaceae	0	0	0	0	0	0	0	0	0	0
0.1.45.11.11.3	Bacteria;Proteobacteria;Gammaproteobacteria;BD7-8_marine_group;endosymbiont_of_Ifremeria_nautilei	0	0	0	0	0	0	0	0	0	0
0.1.45.11.43.3	Bacteria;Proteobacteria;Gammaproteobacteria;Pseudomonadales;unclassified	0	0	0	0	0	0	0	0	0	0
0.1.45.11.53.1	Bacteria;Proteobacteria;Gammaproteobacteria;WN-HWB-116;unclassified	0	0	0	0	0	0	0	0	0	0
0.1.45.12.4.1	Bacteria;Proteobacteria;JTB23;unclassified;unclassified	0	0	0	0	0	0	0	0	0	0
0.1.45.12.5.1	Bacteria;Proteobacteria;JTB23;uncultured_bacterium;unclassified	0	0	0	0	0	0	0	0	0	0
0.1.45.18.3.1	Bacteria;Proteobacteria;SPOTSOCT00m83;uncultured_gamma_proteobacterium;unclassified	0	0	0	0	0	0	0	0	0	0
0.1.49.10.1.1	Bacteria;SHA-109;uncultured_soil_bacterium;unclassified;unclassified	0	0	0	0	0	0	0	0	0	0
0.1.51.1.4.1	Bacteria;Spirochaetae;Spirochaetes;GZKB75;unclassified	0	0	0	0	0	0	0	0	0	0
0.1.51.1.4.2	Bacteria;Spirochaetae;Spirochaetes;GZKB75;uncultured_bacterium	0	0	0	0	0	0	0	0	0	0
0.1.51.1.7.4	Bacteria;Spirochaetae;Spirochaetes;LNR_A2-18;uncultured_bacterium	0	0	0	0	0	0	0	0	0	0
0.1.51.1.14.1	Bacteria;Spirochaetae;Spirochaetes;Spirochaetales;Brachyspiraceae	0	0	0	0	0	0	0	0	0	0
0.1.51.1.14.9	Bacteria;Spirochaetae;Spirochaetes;Spirochaetales;unclassified	0	0	0	0	0	0	0	0	0	0
0.1.55.1.1.1	Bacteria;Tenericutes;Mollicutes;Acholeplasmatales;Acholeplasmataceae	0	0	0	0	0	0	0	0	0	0
0.1.55.1.2.1	Bacteria;Tenericutes;Mollicutes;Anaeroplasmatales;Anaeroplasmataceae	0	0	0	0	0	0	0	0	0	0
0.1.55.1.7.1	Bacteria;Tenericutes;Mollicutes;Haloplasmatales;Haloplasmataceae	0	0	0	0	0	0	0	0	0	0
0.1.55.1.11.5	Bacteria;Tenericutes;Mollicutes;RF9;human_gut_metagenome	0	0	0	0	0	0	0	0	0	0
0.1.55.1.11.15	Bacteria;Tenericutes;Mollicutes;RF9;uncultured_bacterium_adhufec202	0	0	0	0	0	0	0	0	0	0
0.1.55.1.11.10	Bacteria;Tenericutes;Mollicutes;RF9;uncultured_Firmicutes_bacterium	0	0	0	0	0	0	0	0	0	0
0.1.55.1.11.17	Bacteria;Tenericutes;Mollicutes;RF9;uncultured_organism	0	0	0	0	0	0	0	0	0	0
0.1.56.1.1.1	Bacteria;Thermodesulfobacteria;Thermodesulfobacteria;Thermodesulfobacteriales;Thermodesulfobacteriaceae	0	0	0	0	0	0	0	0	0	0
0.1.57.1.1.1	Bacteria;Thermotogae;Thermotogae;Thermotogales;Thermotogaceae	0	0	0	0	0	0	0	0	0	0
0.1.58.2.15.1	Bacteria;Verrucomicrobia;OPB35_soil_group;bacterium_enrichment_culture_clone_R4-41B;unclassified	0	0	0	0	0	0	0	0	0	0
0.1.58.2.1.1	Bacteria;Verrucomicrobia;OPB35_soil_group;Oikopleura_dioica;unclassified	0	0	0	0	0	0	0	0	0	0
0.1.58.2.32.1	Bacteria;Verrucomicrobia;OPB35_soil_group;uncultured_rumen_bacterium;unclassified	0	0	0	0	0	0	0	0	0	0
0.1.58.3.13.4	Bacteria;Verrucomicrobia;Opitutae;vadinHA64;uncultured_Opitutae_bacterium	0	0	0	0	0	0	0	0	0	0

## Sheet: raw counts
mothur rankID	Bacterial family	All samples	BR2-river-2012a	BR2-river-2012b	GOR34-spring1-2011	GOR34-river-2012a	GOR34-river-2012b	GOR34-spring1-2013a	GOR34-spring1-2013b	GOR34-river-2013a	GOR34-river-2013b
0	All families	617142	52045	45787	15056	71285	79012	73829	107493	91952	80683
0.1.45.6.5.5	Bacteria;Proteobacteria;Betaproteobacteria;Burkholderiales;Comamonadaceae	175968	3750	4197	2119	24538	25589	26183	42598	26717	20277
0.1.7.6.1.3	Bacteria;Bacteroidetes;Flavobacteriia;Flavobacteriales;Flavobacteriaceae	51141	1628	1877	15	18882	22383	7	4	3849	2496
0.1.45.6.5.2	Bacteria;Proteobacteria;Betaproteobacteria;Burkholderiales;Burkholderiaceae	37992	150	175	15	4895	2946	22	44	17391	12354
0.1.7.4.1.13	Bacteria;Bacteroidetes;Bacteroidia;Bacteroidales;ML635J-40_aquatic_group	31252	0	0	2831	361	422	13410	13956	160	112
0.1.45.4.21.17	Bacteria;Proteobacteria;Alphaproteobacteria;Sphingomonadales;Sphingomonadaceae	26825	510	721	128	288	324	154	209	12075	12416
0.1.13.20.1.1	Bacteria;Candidate_division_OD1;uncultured_bacterium;unclassified;unclassified	19711	1103	168	3125	696	660	3627	9010	633	689
0.1.32.2.7.4	Bacteria;Firmicutes;Clostridia;Thermoanaerobacterales;SRB2	18648	1	0	1740	456	760	6630	9015	24	22
0.1.44.10.2.1	Bacteria;Planctomycetes;Planctomycetacia;Planctomycetales;Planctomycetaceae	12428	1797	2115	93	1850	1787	319	266	1859	2342
0.1.2.2.11.15	Bacteria;Actinobacteria;Actinobacteria;Micrococcales;Microbacteriaceae	11496	48	48	1	668	705	6	2	4088	5930
0.1.45.11.33.8	Bacteria;Proteobacteria;Gammaproteobacteria;Methylococcales;Methylococcaceae	10920	125	119	653	143	186	4248	5430	8	8
0.1.32.2.2.1	Bacteria;Firmicutes;Clostridia;Clostridiales;Caldicoprobacteraceae	9450	0	0	552	91	187	3689	4916	14	1
0.1.2.2.8.6	Bacteria;Actinobacteria;Actinobacteria;Frankiales;Sporichthyaceae	8810	4	3	0	139	169	1	1	5467	3026
0.1.63.1.1.1	Bacteria;unclassified;unclassified;unclassified;unclassified	8286	1702	1226	385	785	1033	466	1277	797	615
0.1.7.5.1.2	Bacteria;Bacteroidetes;Cytophagia;Cytophagales;Cytophagaceae	7396	1055	1174	165	551	558	244	792	1928	929
0.1.45.11.54.5	Bacteria;Proteobacteria;Gammaproteobacteria;Xanthomonadales;Xanthomonadaceae	6817	324	451	111	194	179	1537	3388	249	384
0.1.45.7.14.1	Bacteria;Proteobacteria;Deltaproteobacteria;Myxococcales;0319-6G20	6639	3666	1274	78	506	709	23	82	166	135
0.1.7.16.1.1	Bacteria;Bacteroidetes;unclassified;unclassified;unclassified	6182	347	349	138	380	528	3055	1148	151	86
0.1.7.13.1.5	Bacteria;Bacteroidetes;Sphingobacteriia;Sphingobacteriales;Chitinophagaceae	5810	345	487	32	342	467	19	24	2330	1764
0.1.45.23.1.1	Bacteria;Proteobacteria;unclassified;unclassified;unclassified	4754	907	580	40	547	1204	63	269	680	464
0.1.32.2.2.6	Bacteria;Firmicutes;Clostridia;Clostridiales;Clostridiaceae_4	4695	0	0	138	106	122	921	3401	3	4
0.1.45.11.56.1	Bacteria;Proteobacteria;Gammaproteobacteria;unclassified;unclassified	4427	711	647	35	550	603	609	542	324	406
0.1.45.11.31.2	Bacteria;Proteobacteria;Gammaproteobacteria;Legionellales;Legionellaceae	4248	1122	770	15	362	327	14	9	585	1044
0.1.7.4.1.14	Bacteria;Bacteroidetes;Bacteroidia;Bacteroidales;Marinilabiaceae	4231	0	2	133	95	60	2638	1294	4	5
0.1.15.3.1.1	Bacteria;Candidate_division_OP3;unclassified;unclassified;unclassified	3644	1696	1446	15	105	351	3	28	0	0
0.1.45.11.31.1	Bacteria;Proteobacteria;Gammaproteobacteria;Legionellales;Coxiellaceae	3570	871	613	12	189	174	6	1	555	1149
0.1.45.11.5.1	Bacteria;Proteobacteria;Gammaproteobacteria;Aeromonadales;Aeromonadaceae	3487	966	1551	1	267	351	22	32	127	170
0.1.45.4.14.1	Bacteria;Proteobacteria;Alphaproteobacteria;Rhodobacterales;Rhodobacteraceae	3139	295	472	104	92	177	950	682	108	259
0.1.26.2.7.1	Bacteria;Cyanobacteria;Cyanobacteria;SubsectionIII;FamilyI	2712	280	292	13	205	272	80	135	819	616
0.1.32.2.2.29	Bacteria;Firmicutes;Clostridia;Clostridiales;Syntrophomonadaceae	2578	0	1	213	532	490	669	614	31	28
0.1.45.11.43.2	Bacteria;Proteobacteria;Gammaproteobacteria;Pseudomonadales;Pseudomonadaceae	2383	939	1129	10	22	65	27	97	32	62
0.1.45.4.24.1	Bacteria;Proteobacteria;Alphaproteobacteria;unclassified;unclassified	2230	273	184	13	393	362	44	140	440	381
0.1.45.6.11.1	Bacteria;Proteobacteria;Betaproteobacteria;Neisseriales;Neisseriaceae	1990	594	649	5	172	215	0	0	148	207
0.1.45.7.4.2	Bacteria;Proteobacteria;Deltaproteobacteria;Bdellovibrionales;Bdellovibrionaceae	1798	885	450	18	113	221	2	27	39	43
0.1.58.3.6.1	Bacteria;Verrucomicrobia;Opitutae;Opitutales;Opitutaceae	1727	571	482	17	205	377	9	24	19	23
0.1.45.4.16.9	Bacteria;Proteobacteria;Alphaproteobacteria;Rickettsiales;Rickettsiales_Incertae_Sedis	1546	231	217	10	253	196	38	103	300	198
0.1.7.13.1.17	Bacteria;Bacteroidetes;Sphingobacteriia;Sphingobacteriales;Saprospiraceae	1517	286	278	3	345	451	5	9	71	69
0.1.45.4.16.8	Bacteria;Proteobacteria;Alphaproteobacteria;Rickettsiales;Rickettsiaceae	1514	231	185	16	316	205	8	15	315	223
0.1.45.7.14.18	Bacteria;Proteobacteria;Deltaproteobacteria;Myxococcales;uncultured	1513	523	423	10	185	231	5	17	60	59
0.1.45.6.14.1	Bacteria;Proteobacteria;Betaproteobacteria;Rhodocyclales;Rhodocyclaceae	1501	443	468	4	179	233	3	21	80	70
0.1.45.6.21.1	Bacteria;Proteobacteria;Betaproteobacteria;unclassified;unclassified	1492	241	199	12	209	183	122	43	340	143
0.1.45.7.4.1	Bacteria;Proteobacteria;Deltaproteobacteria;Bdellovibrionales;Bacteriovoracaceae	1486	784	300	15	148	184	2	9	23	21
0.1.45.4.16.14	Bacteria;Proteobacteria;Alphaproteobacteria;Rickettsiales;SM2D12	1485	129	69	4	282	196	17	43	395	350
0.1.45.11.22.1	Bacteria;Proteobacteria;Gammaproteobacteria;Enterobacteriales;Enterobacteriaceae	1451	468	651	10	53	61	37	43	47	81
0.1.7.6.1.2	Bacteria;Bacteroidetes;Flavobacteriia;Flavobacteriales;Cryomorphaceae	1425	368	386	6	221	252	0	0	113	79
0.1.41.2.1.1	Bacteria;NPL-UPA2;unclassified;unclassified;unclassified	1413	457	469	6	100	361	5	15	0	0
0.1.7.5.1.1	Bacteria;Bacteroidetes;Cytophagia;Cytophagales;Cyclobacteriaceae	1402	11	11	3	21	16	13	16	911	400
0.1.7.13.1.11	Bacteria;Bacteroidetes;Sphingobacteriia;Sphingobacteriales;NS11-12_marine_group	1378	119	182	11	140	181	0	7	460	278
0.1.45.6.5.6	Bacteria;Proteobacteria;Betaproteobacteria;Burkholderiales;Oxalobacteraceae	1356	522	572	6	37	32	4	5	61	117
0.1.32.1.2.5	Bacteria;Firmicutes;Bacilli;Bacillales;Family_XII	1347	3	0	0	0	1	1	0	168	1174
0.1.58.2.19.1	Bacteria;Verrucomicrobia;OPB35_soil_group;unclassified;unclassified	1320	420	458	12	87	230	27	62	8	16
0.1.58.8.1.5	Bacteria;Verrucomicrobia;Verrucomicrobiae;Verrucomicrobiales;Verrucomicrobiaceae	1310	74	167	2	210	285	5	6	327	234
0.1.45.4.15.3	Bacteria;Proteobacteria;Alphaproteobacteria;Rhodospirillales;Acetobacteraceae	1295	72	110	144	134	188	208	301	48	90
0.1.22.1.1.7	Bacteria;Chlamydiae;Chlamydiae;Chlamydiales;cvE6	1292	479	174	6	85	104	0	16	121	307
0.1.45.11.34.4	Bacteria;Proteobacteria;Gammaproteobacteria;NKB5;unclassified	1291	293	182	4	267	174	1	6	163	201
0.1.54.10.1.1	Bacteria;TM6;uncultured_bacterium;unclassified;unclassified	1268	340	196	3	136	226	7	11	150	199
0.1.45.6.5.8	Bacteria;Proteobacteria;Betaproteobacteria;Burkholderiales;unclassified	1265	34	22	0	69	50	2	12	846	230
0.1.32.2.2.25	Bacteria;Firmicutes;Clostridia;Clostridiales;P._palm_C-A_51	1259	1	1	191	83	165	251	550	10	7
0.1.13.10.1.1	Bacteria;Candidate_division_OD1;unclassified;unclassified;unclassified	1214	216	38	42	183	112	62	168	176	217
0.1.22.1.1.4	Bacteria;Chlamydiae;Chlamydiae;Chlamydiales;Simkaniaceae	1213	401	241	7	120	253	8	11	73	99
0.1.24.1.1.1	Bacteria;Chloroflexi;Anaerolineae;Anaerolineales;Anaerolineaceae	1068	243	245	8	71	95	241	50	37	78
0.1.51.1.14.6	Bacteria;Spirochaetae;Spirochaetes;Spirochaetales;Spirochaetaceae	1068	112	44	37	69	120	115	566	3	2
0.1.7.13.1.21	Bacteria;Bacteroidetes;Sphingobacteriia;Sphingobacteriales;env.OPS_17	1057	344	302	76	107	122	3	6	60	37
0.1.14.9.1.1	Bacteria;Candidate_division_OP11;unclassified;unclassified;unclassified	1047	223	45	3	55	115	1	9	74	522
0.1.44.14.3.1	Bacteria;Planctomycetes;vadinHA49;unclassified;unclassified	1001	467	434	2	25	51	0	1	7	14
0.1.50.3.1.1	Bacteria;SM2F11;uncultured_bacterium;unclassified;unclassified	999	399	65	2	97	78	3	11	164	180
0.1.45.7.9.3	Bacteria;Proteobacteria;Deltaproteobacteria;Desulfovibrionales;Desulfonatronaceae	973	0	0	60	18	16	257	613	9	0
0.1.45.6.10.1	Bacteria;Proteobacteria;Betaproteobacteria;Methylophilales;Methylophilaceae	959	365	296	0	106	115	0	0	44	33
0.1.42.1.1.7	Bacteria;Nitrospirae;Nitrospira;Nitrospirales;Nitrospiraceae	954	194	163	47	40	67	131	285	19	8
0.1.45.6.12.2	Bacteria;Proteobacteria;Betaproteobacteria;Nitrosomonadales;Nitrosomonadaceae	932	264	258	4	167	131	6	8	50	44
0.1.45.11.43.1	Bacteria;Proteobacteria;Gammaproteobacteria;Pseudomonadales;Moraxellaceae	924	311	374	0	42	54	0	1	54	88
0.1.45.4.5.1	Bacteria;Proteobacteria;Alphaproteobacteria;Caulobacterales;Caulobacteraceae	901	187	258	10	109	131	49	23	48	86
0.1.45.4.21.16	Bacteria;Proteobacteria;Alphaproteobacteria;Sphingomonadales;SWB04	897	22	23	3	256	217	46	141	92	97
0.1.7.13.1.23	Bacteria;Bacteroidetes;Sphingobacteriia;Sphingobacteriales;unclassified	882	193	151	196	82	107	14	63	43	33
0.1.32.3.1.1	Bacteria;Firmicutes;Erysipelotrichia;Erysipelotrichales;Erysipelotrichaceae	881	12	9	8	107	84	216	410	16	19
0.1.45.4.15.14	Bacteria;Proteobacteria;Alphaproteobacteria;Rhodospirillales;Rhodospirillaceae	873	170	190	32	157	177	17	49	46	35
0.1.14.15.1.1	Bacteria;Candidate_division_OP11;uncultured_bacterium;unclassified;unclassified	856	188	37	0	30	61	1	6	87	446
0.1.54.4.1.1	Bacteria;TM6;unclassified;unclassified;unclassified	856	195	156	8	108	164	7	14	98	106
0.1.45.7.21.1	Bacteria;Proteobacteria;Deltaproteobacteria;unclassified;unclassified	843	324	198	9	57	108	6	29	50	62
0.1.32.2.2.28	Bacteria;Firmicutes;Clostridia;Clostridiales;Ruminococcaceae	835	55	30	84	77	172	90	274	22	31
0.1.32.2.2.34	Bacteria;Firmicutes;Clostridia;Clostridiales;unclassified	835	23	14	131	21	48	162	418	8	10
0.1.44.14.7.1	Bacteria;Planctomycetes;vadinHA49;uncultured_Planctomycetales_bacterium;unclassified	824	318	259	10	46	185	4	0	2	0
0.1.7.4.1.18	Bacteria;Bacteroidetes;Bacteroidia;Bacteroidales;Porphyromonadaceae	759	159	154	10	129	138	4	24	70	71
0.1.31.1.1.6	Bacteria;Fibrobacteres;Fibrobacteria;Fibrobacterales;Fibrobacteraceae	718	316	301	18	30	44	0	1	3	5
0.1.44.6.7.1	Bacteria;Planctomycetes;OM190;uncultured_bacterium;unclassified	701	236	204	1	81	162	0	0	11	6
0.1.45.7.14.14	Bacteria;Proteobacteria;Deltaproteobacteria;Myxococcales;Sandaracinaceae	693	265	289	2	44	80	1	4	6	2
0.1.1.1.20.14	Bacteria;Acidobacteria;Acidobacteria;Subgroup_6;unclassified	676	206	266	6	69	55	5	8	34	27
0.1.15.10.1.1	Bacteria;Candidate_division_OP3;uncultured_bacterium;unclassified;unclassified	672	290	270	8	19	66	5	14	0	0
0.1.7.13.1.12	Bacteria;Bacteroidetes;Sphingobacteriia;Sphingobacteriales;PHOS-HE51	663	294	270	1	29	40	0	0	13	16
0.1.28.1.1.2	Bacteria;Deinococcus-Thermus;Deinococci;Deinococcales;Trueperaceae	660	29	35	18	8	6	385	172	1	6
0.1.45.4.13.19	Bacteria;Proteobacteria;Alphaproteobacteria;Rhizobiales;Hyphomicrobiaceae	654	132	171	4	69	69	15	4	59	131
0.1.45.20.2.1	Bacteria;Proteobacteria;TA18;unclassified;unclassified	624	51	53	2	68	67	2	22	123	236
0.1.45.7.13.5	Bacteria;Proteobacteria;Deltaproteobacteria;GR-WP33-30;unclassified	609	217	169	10	61	76	3	5	29	39
0.1.26.4.1.1	Bacteria;Cyanobacteria;Melainabacteria;Caenarcaniphilales;unclassified	593	23	18	2	253	276	0	3	11	7
0.1.32.2.9.1	Bacteria;Firmicutes;Clostridia;unclassified;unclassified	576	0	0	85	17	14	91	367	1	1
0.1.45.11.54.8	Bacteria;Proteobacteria;Gammaproteobacteria;Xanthomonadales;uncultured	570	158	191	4	85	62	1	3	34	32
0.1.45.4.6.8	Bacteria;Proteobacteria;Alphaproteobacteria;DB1-14;uncultured_bacterium	560	91	31	2	94	96	5	22	122	97
0.1.45.4.16.19	Bacteria;Proteobacteria;Alphaproteobacteria;Rickettsiales;unclassified	557	155	86	4	94	71	3	7	75	62
0.1.45.6.5.1	Bacteria;Proteobacteria;Betaproteobacteria;Burkholderiales;Alcaligenaceae	547	45	36	7	8	13	200	203	18	17
0.1.22.1.1.8	Bacteria;Chlamydiae;Chlamydiae;Chlamydiales;unclassified	539	138	109	3	35	53	2	7	77	115
0.1.7.13.1.18	Bacteria;Bacteroidetes;Sphingobacteriia;Sphingobacteriales;Sphingobacteriaceae	534	127	171	1	37	29	0	1	124	44
0.1.45.4.5.2	Bacteria;Proteobacteria;Alphaproteobacteria;Caulobacterales;Hyphomonadaceae	530	61	83	0	98	109	2	13	68	96
0.1.7.6.1.5	Bacteria;Bacteroidetes;Flavobacteriia;Flavobacteriales;NS9_marine_group	508	48	45	1	100	127	3	5	70	109
0.1.26.2.6.2	Bacteria;Cyanobacteria;Cyanobacteria;SubsectionII;FamilyII	507	244	247	0	2	0	0	0	7	7
0.1.45.4.16.4	Bacteria;Proteobacteria;Alphaproteobacteria;Rickettsiales;Holosporaceae	503	121	82	8	59	29	5	26	94	79
0.1.30.1.5.6	Bacteria;Elusimicrobia;Elusimicrobia;Lineage_IIb;uncultured_bacterium	499	265	122	3	34	49	4	6	9	7
0.1.45.11.34.7	Bacteria;Proteobacteria;Gammaproteobacteria;NKB5;uncultured_bacterium	491	116	106	0	35	41	1	0	73	119
0.1.7.5.1.6	Bacteria;Bacteroidetes;Cytophagia;Cytophagales;unclassified	487	106	110	8	82	124	7	17	15	18
0.1.45.4.13.2	Bacteria;Proteobacteria;Alphaproteobacteria;Rhizobiales;A0839	485	49	67	1	121	121	0	3	84	39
0.1.45.7.14.6	Bacteria;Proteobacteria;Deltaproteobacteria;Myxococcales;Haliangiaceae	484	182	176	1	33	49	4	12	12	15
0.1.51.1.14.4	Bacteria;Spirochaetae;Spirochaetes;Spirochaetales;Leptospiraceae	477	18	13	42	157	47	35	161	3	1
0.1.15.15.1.1	Bacteria;Candidate_division_OP3;uncultured_planctomycete;unclassified;unclassified	467	204	171	6	18	58	3	7	0	0
0.1.30.1.6.3	Bacteria;Elusimicrobia;Elusimicrobia;Lineage_IIc;uncultured_bacterium	440	284	125	1	13	14	0	2	0	1
0.1.30.1.10.3	Bacteria;Elusimicrobia;Elusimicrobia;MVP-88;uncultured_bacterium	438	264	155	2	9	5	0	3	0	0
0.1.23.1.1.2	Bacteria;Chlorobi;Chlorobia;Chlorobiales;OPB56	435	60	115	14	77	97	5	16	18	33
0.1.7.13.1.10	Bacteria;Bacteroidetes;Sphingobacteriia;Sphingobacteriales;LiUU-11-161	426	3	1	10	97	90	0	1	42	182
0.1.26.2.5.1	Bacteria;Cyanobacteria;Cyanobacteria;SubsectionI;FamilyI	423	32	55	0	8	13	2	3	123	187
0.1.55.1.11.6	Bacteria;Tenericutes;Mollicutes;RF9;unclassified	422	3	2	1	20	20	37	338	1	0
0.1.7.13.1.9	Bacteria;Bacteroidetes;Sphingobacteriia;Sphingobacteriales;KD3-93	418	197	160	6	16	17	0	0	14	8
0.1.45.4.6.5	Bacteria;Proteobacteria;Alphaproteobacteria;DB1-14;unclassified	412	54	22	0	59	50	7	26	91	103
0.1.45.4.13.36	Bacteria;Proteobacteria;Alphaproteobacteria;Rhizobiales;unclassified	409	66	92	3	33	53	6	1	38	117
0.1.2.3.1.1	Bacteria;Actinobacteria;Coriobacteriia;Coriobacteriales;Coriobacteriaceae	399	1	1	10	22	25	165	142	19	14
0.1.45.4.21.8	Bacteria;Proteobacteria;Alphaproteobacteria;Sphingomonadales;Erythrobacteraceae	392	28	62	7	78	69	31	16	20	81
0.1.41.4.1.1	Bacteria;NPL-UPA2;uncultured_Omnitrophica_bacterium;unclassified;unclassified	386	159	144	1	10	68	1	3	0	0
0.1.45.11.7.1	Bacteria;Proteobacteria;Gammaproteobacteria;Alteromonadales;Alteromonadaceae	379	142	154	0	25	41	1	0	2	14
0.1.45.20.10.1	Bacteria;Proteobacteria;TA18;uncultured_bacterium;unclassified	374	39	19	0	35	33	0	10	58	180
0.1.15.6.1.1	Bacteria;Candidate_division_OP3;uncultured_Firmicutes_bacterium;unclassified;unclassified	372	184	146	4	6	21	3	8	0	0
0.1.23.2.1.11	Bacteria;Chlorobi;Ignavibacteria;Ignavibacteriales;unclassified	372	0	1	22	104	102	18	88	20	17
0.1.45.4.13.25	Bacteria;Proteobacteria;Alphaproteobacteria;Rhizobiales;Methylobacteriaceae	372	63	48	2	63	42	5	4	42	103
0.1.26.4.1.3	Bacteria;Cyanobacteria;Melainabacteria;Caenarcaniphilales;uncultured_bacterium	370	69	36	0	110	116	0	2	19	18
0.1.59.10.1.1	Bacteria;WCHB1-60;uncultured_microorganism;unclassified;unclassified	367	0	0	1	54	96	34	57	43	82
0.1.44.7.12.4	Bacteria;Planctomycetes;Phycisphaerae;Phycisphaerales;Phycisphaeraceae	364	67	70	2	62	98	3	34	10	18
0.1.45.11.54.6	Bacteria;Proteobacteria;Gammaproteobacteria;Xanthomonadales;Xanthomonadales_Incertae_Sedis	364	158	145	1	12	37	0	2	5	4
0.1.7.13.1.3	Bacteria;Bacteroidetes;Sphingobacteriia;Sphingobacteriales;CMW-169	358	0	0	0	45	44	34	212	11	12
0.1.45.7.14.17	Bacteria;Proteobacteria;Deltaproteobacteria;Myxococcales;unclassified	353	125	108	2	41	62	1	3	6	5
0.1.26.4.1.4	Bacteria;Cyanobacteria;Melainabacteria;Caenarcaniphilales;uncultured_cyanobacterium	349	46	23	2	100	135	1	1	32	9
0.1.45.11.18.1	Bacteria;Proteobacteria;Gammaproteobacteria;Chromatiales;Chromatiaceae	330	113	117	11	28	54	0	3	1	3
0.1.58.2.28.1	Bacteria;Verrucomicrobia;OPB35_soil_group;uncultured_bacterium;unclassified	330	137	149	0	13	30	0	0	0	1
0.1.45.4.16.1	Bacteria;Proteobacteria;Alphaproteobacteria;Rickettsiales;AKIW1012	312	39	26	0	62	33	0	4	95	53
0.1.4.7.1.1	Bacteria;Armatimonadetes;unclassified;unclassified;unclassified	311	11	21	2	15	48	86	61	28	39
0.1.26.3.2.1	Bacteria;Cyanobacteria;ML635J-21;unclassified;unclassified	308	81	58	3	61	51	0	0	36	18
0.1.1.1.18.5	Bacteria;Acidobacteria;Acidobacteria;Subgroup_4;Unknown_Family	305	70	80	3	12	22	31	8	28	51
0.1.30.1.7.6	Bacteria;Elusimicrobia;Elusimicrobia;Lineage_IV;uncultured_bacterium	302	171	101	1	13	16	0	0	0	0
0.1.45.7.13.1	Bacteria;Proteobacteria;Deltaproteobacteria;GR-WP33-30;bacterium_enrichment_culture_clone_B126	302	127	59	0	32	58	0	1	12	13
0.1.44.2.6.1	Bacteria;Planctomycetes;BD7-11;uncultured_bacterium_PHOS-HE93;unclassified	299	118	106	0	31	35	0	0	7	2
0.1.26.4.4.4	Bacteria;Cyanobacteria;Melainabacteria;Vampirovibrionales;uncultured_bacterium	298	19	17	0	18	41	2	6	73	122
0.1.45.4.21.22	Bacteria;Proteobacteria;Alphaproteobacteria;Sphingomonadales;unclassified	298	34	34	4	16	19	38	59	31	63
0.1.7.13.1.19	Bacteria;Bacteroidetes;Sphingobacteriia;Sphingobacteriales;WCHB1-69	293	1	2	37	11	15	35	161	15	16
0.1.32.4.1.2	Bacteria;Firmicutes;Negativicutes;Selenomonadales;Veillonellaceae	280	101	77	1	34	24	3	6	14	20
0.1.33.1.1.3	Bacteria;Fusobacteria;Fusobacteriia;Fusobacteriales;Fusobacteriaceae	277	0	3	0	115	83	0	0	28	48
0.1.36.1.3.1	Bacteria;Gemmatimonadetes;Gemmatimonadetes;Gemmatimonadales;Gemmatimonadaceae	276	57	68	1	37	36	6	9	27	35
0.1.45.11.7.10	Bacteria;Proteobacteria;Gammaproteobacteria;Alteromonadales;Shewanellaceae	275	109	160	0	2	1	0	0	1	2
0.1.45.6.16.5	Bacteria;Proteobacteria;Betaproteobacteria;TRA3-20;unclassified	274	76	73	2	50	44	1	2	14	12
0.1.45.4.15.15	Bacteria;Proteobacteria;Alphaproteobacteria;Rhodospirillales;Rhodospirillales_Incertae_Sedis	269	64	76	1	25	28	10	10	18	37
0.1.58.9.1.1	Bacteria;Verrucomicrobia;unclassified;unclassified;unclassified	269	68	71	0	32	40	0	10	19	29
0.1.5.11.1.1	Bacteria;BD1-5;unclassified;unclassified;unclassified	268	98	31	0	14	19	0	6	46	54
0.1.44.7.17.8	Bacteria;Planctomycetes;Phycisphaerae;WD2101_soil_group;unclassified	255	4	7	44	13	27	62	84	8	6
0.1.45.11.36.21	Bacteria;Proteobacteria;Gammaproteobacteria;Oceanospirillales;Oceanospirillaceae	254	81	70	0	44	47	1	0	10	1
0.1.45.7.14.11	Bacteria;Proteobacteria;Deltaproteobacteria;Myxococcales;Nannocystaceae	251	101	77	3	20	43	1	3	2	1
0.1.24.23.3.1	Bacteria;Chloroflexi;uncultured;unclassified;unclassified	241	3	6	104	3	8	27	61	21	8
0.1.32.2.2.12	Bacteria;Firmicutes;Clostridia;Clostridiales;Family_XII	229	25	32	0	53	72	2	23	10	12
0.1.30.1.7.2	Bacteria;Elusimicrobia;Elusimicrobia;Lineage_IV;unclassified	214	110	74	1	13	14	1	1	0	0
0.1.45.4.13.21	Bacteria;Proteobacteria;Alphaproteobacteria;Rhizobiales;JG35-K1-AG5	206	81	95	0	6	4	0	0	3	17
0.1.45.4.13.23	Bacteria;Proteobacteria;Alphaproteobacteria;Rhizobiales;MNG7	204	67	81	0	10	15	0	0	11	20
0.1.26.7.1.1	Bacteria;Cyanobacteria;unclassified;unclassified;unclassified	200	25	46	1	22	40	2	5	42	17
0.1.45.4.13.26	Bacteria;Proteobacteria;Alphaproteobacteria;Rhizobiales;Methylocystaceae	199	85	78	4	4	4	0	0	14	10
0.1.45.4.15.16	Bacteria;Proteobacteria;Alphaproteobacteria;Rhodospirillales;unclassified	197	48	36	0	42	33	2	23	8	5
0.1.14.2.1.1	Bacteria;Candidate_division_OP11;Microgenomates_bacterium_SCGC_AAA011-B20;unclassified;unclassified	195	14	1	0	14	23	5	3	29	106
0.1.58.5.1.2	Bacteria;Verrucomicrobia;Spartobacteria;Chthoniobacterales;Chthoniobacteraceae	193	30	50	2	24	46	2	1	18	20
0.1.22.1.1.3	Bacteria;Chlamydiae;Chlamydiae;Chlamydiales;Parachlamydiaceae	191	26	39	2	10	13	2	4	33	62
0.1.32.2.2.3	Bacteria;Firmicutes;Clostridia;Clostridiales;Clostridiaceae_1	191	98	67	0	10	5	0	4	2	5
0.1.1.1.18.1	Bacteria;Acidobacteria;Acidobacteria;Subgroup_4;11-24	190	86	72	0	10	11	0	0	4	7
0.1.26.2.14.1	Bacteria;Cyanobacteria;Cyanobacteria;unclassified;unclassified	189	36	33	0	14	9	4	3	39	51
0.1.44.6.2.1	Bacteria;Planctomycetes;OM190;unclassified;unclassified	185	76	57	0	7	41	0	0	2	2
0.1.19.20.1.1	Bacteria;Candidate_division_TM7;unclassified;unclassified;unclassified	183	20	17	0	1	2	0	0	20	123
0.1.58.3.10.1	Bacteria;Verrucomicrobia;Opitutae;unclassified;unclassified	179	42	48	1	23	50	0	1	4	10
0.1.45.4.16.20	Bacteria;Proteobacteria;Alphaproteobacteria;Rickettsiales;uncultured	178	34	37	1	39	17	0	1	19	30
0.1.26.4.3.6	Bacteria;Cyanobacteria;Melainabacteria;Obscuribacterales;uncultured_bacterium	177	56	43	1	26	27	6	7	4	7
0.1.7.5.1.3	Bacteria;Bacteroidetes;Cytophagia;Cytophagales;Flammeovirgaceae	174	85	61	5	3	12	1	7	0	0
0.1.44.13.1.1	Bacteria;Planctomycetes;unclassified;unclassified;unclassified	172	67	61	0	15	13	0	0	7	9
0.1.5.21.1.1	Bacteria;BD1-5;uncultured_bacterium_GKS2-30;unclassified;unclassified	170	36	12	1	16	15	0	0	39	51
0.1.45.6.6.2	Bacteria;Proteobacteria;Betaproteobacteria;DR-16;uncultured_bacterium	170	81	81	0	5	2	0	0	0	1
0.1.32.6.1.1	Bacteria;Firmicutes;unclassified;unclassified;unclassified	169	3	0	35	6	8	22	91	0	4
0.1.45.4.13.34	Bacteria;Proteobacteria;Alphaproteobacteria;Rhizobiales;Xanthobacteraceae	165	62	42	3	9	11	4	0	11	23
0.1.54.12.1.1	Bacteria;TM6;uncultured_bacterium_SBRH58;unclassified;unclassified	165	46	39	9	20	42	0	0	6	3
0.1.55.1.9.1	Bacteria;Tenericutes;Mollicutes;Mycoplasmatales;Mycoplasmataceae	164	8	28	0	28	31	0	0	25	44
0.1.45.7.14.13	Bacteria;Proteobacteria;Deltaproteobacteria;Myxococcales;Polyangiaceae	161	51	67	6	13	12	1	1	3	7
0.1.7.4.1.22	Bacteria;Bacteroidetes;Bacteroidia;Bacteroidales;Rikenellaceae	157	39	29	0	20	21	0	2	14	32
0.1.45.11.33.13	Bacteria;Proteobacteria;Gammaproteobacteria;Methylococcales;unclassified	152	66	58	6	8	8	2	4	0	0
0.1.58.5.1.4	Bacteria;Verrucomicrobia;Spartobacteria;Chthoniobacterales;FukuN18_freshwater_group	151	9	18	1	9	19	8	10	31	46
0.1.45.11.34.15	Bacteria;Proteobacteria;Gammaproteobacteria;NKB5;uncultured_soil_bacterium	149	44	24	0	15	13	0	0	26	27
0.1.45.4.13.30	Bacteria;Proteobacteria;Alphaproteobacteria;Rhizobiales;Rhizobiaceae	148	46	60	3	3	7	4	2	4	19
0.1.1.1.17.8	Bacteria;Acidobacteria;Acidobacteria;Subgroup_3;Unknown_Family	146	37	40	3	14	23	5	9	7	8
0.1.30.1.4.3	Bacteria;Elusimicrobia;Elusimicrobia;Lineage_IIa;unclassified	145	84	38	2	4	11	0	0	6	0
0.1.45.11.33.2	Bacteria;Proteobacteria;Gammaproteobacteria;Methylococcales;CABC2E06	145	1	0	0	58	86	0	0	0	0
0.1.45.4.13.9	Bacteria;Proteobacteria;Alphaproteobacteria;Rhizobiales;Bradyrhizobiaceae	140	46	57	2	7	4	4	0	8	12
0.1.28.1.1.1	Bacteria;Deinococcus-Thermus;Deinococci;Deinococcales;Deinococcaceae	134	42	39	2	1	3	1	1	6	39
0.1.44.14.14.1	Bacteria;Planctomycetes;vadinHA49;uncultured_soil_bacterium;unclassified	134	41	34	1	10	28	2	10	4	4
0.1.1.1.17.9	Bacteria;Acidobacteria;Acidobacteria;Subgroup_3;unclassified	133	6	7	21	5	7	36	48	2	1
0.1.58.5.1.5	Bacteria;Verrucomicrobia;Spartobacteria;Chthoniobacterales;LD29	133	0	0	5	12	11	26	71	5	3
0.1.49.2.1.1	Bacteria;SHA-109;unclassified;unclassified;unclassified	132	10	19	0	12	32	0	0	25	34
0.1.2.2.19.1	Bacteria;Actinobacteria;Actinobacteria;unclassified;unclassified	128	17	13	0	0	0	1	0	75	22
0.1.45.6.9.1	Bacteria;Proteobacteria;Betaproteobacteria;Hydrogenophilales;Hydrogenophilaceae	127	8	11	5	17	16	17	27	10	16
0.1.44.7.17.12	Bacteria;Planctomycetes;Phycisphaerae;WD2101_soil_group;uncultured_bacterium	126	17	29	1	19	15	3	17	10	15
0.1.41.3.1.1	Bacteria;NPL-UPA2;uncultured_Flavobacteriaceae_bacterium;unclassified;unclassified	125	67	42	0	4	10	0	2	0	0
0.1.45.11.51.3	Bacteria;Proteobacteria;Gammaproteobacteria;Thiotrichales;EV818SWSAP88	125	14	11	0	6	12	0	2	25	55
0.1.44.7.15.5	Bacteria;Planctomycetes;Phycisphaerae;S15A-MN16;uncultured_soil_bacterium	122	0	0	3	13	24	39	43	0	0
0.1.30.1.6.1	Bacteria;Elusimicrobia;Elusimicrobia;Lineage_IIc;unclassified	121	80	33	0	3	1	0	1	2	1
0.1.7.5.1.4	Bacteria;Bacteroidetes;Cytophagia;Cytophagales;MWH-CFBk5	120	58	58	0	2	2	0	0	0	0
0.1.45.4.15.7	Bacteria;Proteobacteria;Alphaproteobacteria;Rhodospirillales;I-10	120	34	24	1	24	33	1	0	2	1
0.1.10.3.1.1	Bacteria;Candidate_division_BRC1;unclassified;unclassified;unclassified	119	22	37	1	12	19	0	0	12	16
0.1.2.2.14.1	Bacteria;Actinobacteria;Actinobacteria;Propionibacteriales;Nocardioidaceae	118	49	62	1	0	1	1	1	0	3
0.1.45.11.18.2	Bacteria;Proteobacteria;Gammaproteobacteria;Chromatiales;Ectothiorhodospiraceae	118	79	30	0	2	1	2	4	0	0
0.1.32.2.2.9	Bacteria;Firmicutes;Clostridia;Clostridiales;Defluviitaleaceae	116	24	22	0	17	41	1	0	6	5
0.1.45.4.13.29	Bacteria;Proteobacteria;Alphaproteobacteria;Rhizobiales;Phyllobacteriaceae	114	31	56	0	6	4	1	2	4	10
0.1.58.7.1.1	Bacteria;Verrucomicrobia;Verrucomicrobia_Incertae_Sedis;Unknown_Order;Unknown_Family	114	46	33	0	15	16	1	0	1	2
0.1.1.1.19.1	Bacteria;Acidobacteria;Acidobacteria;Subgroup_5;unclassified	112	46	39	0	9	16	0	0	2	0
0.1.15.11.1.1	Bacteria;Candidate_division_OP3;uncultured_beta_proteobacterium;unclassified;unclassified	112	32	54	0	9	17	0	0	0	0
0.1.15.12.1.1	Bacteria;Candidate_division_OP3;uncultured_deep-sea_bacterium;unclassified;unclassified	112	53	46	1	2	9	0	1	0	0
0.1.45.4.13.31	Bacteria;Proteobacteria;Alphaproteobacteria;Rhizobiales;Rhizobiales_Incertae_Sedis	112	32	50	1	10	4	1	2	4	8
0.1.45.7.11.8	Bacteria;Proteobacteria;Deltaproteobacteria;Desulfuromonadales;Desulfuromonadaceae	110	3	0	0	46	59	0	1	1	0
0.1.58.2.21.1	Bacteria;Verrucomicrobia;OPB35_soil_group;uncultured_Crater_Lake_bacterium_CL120-133;unclassified	110	52	49	0	5	4	0	0	0	0
0.1.1.1.20.18	Bacteria;Acidobacteria;Acidobacteria;Subgroup_6;uncultured_Acidobacteria_bacterium	107	14	24	0	23	22	0	7	12	5
0.1.32.1.2.2	Bacteria;Firmicutes;Bacilli;Bacillales;Bacillaceae	107	15	27	1	6	18	1	1	8	30
0.1.45.6.16.18	Bacteria;Proteobacteria;Betaproteobacteria;TRA3-20;uncultured_beta_proteobacterium	107	16	30	1	25	28	0	0	3	4
0.1.45.4.16.5	Bacteria;Proteobacteria;Alphaproteobacteria;Rickettsiales;LR_A2-29	106	5	5	4	38	31	3	17	2	1
0.1.50.1.1.1	Bacteria;SM2F11;unclassified;unclassified;unclassified	105	63	5	0	7	2	0	3	9	16
0.1.45.11.54.4	Bacteria;Proteobacteria;Gammaproteobacteria;Xanthomonadales;Solimonadaceae	104	32	43	2	10	9	0	1	2	5
0.1.7.4.1.4	Bacteria;Bacteroidetes;Bacteroidia;Bacteroidales;Bacteroidaceae	102	13	5	0	25	33	0	0	4	22
0.1.58.5.1.6	Bacteria;Verrucomicrobia;Spartobacteria;Chthoniobacterales;Xiphinematobacteraceae	102	10	16	2	11	12	19	19	4	9
0.1.26.4.4.1	Bacteria;Cyanobacteria;Melainabacteria;Vampirovibrionales;Vampirovibrio_chlorellavorus	101	0	0	0	7	10	0	0	38	46
0.1.45.4.12.1	Bacteria;Proteobacteria;Alphaproteobacteria;Parvularculales;Parvularculaceae	101	4	10	0	15	26	2	0	15	29
0.1.45.7.18.3	Bacteria;Proteobacteria;Deltaproteobacteria;Sh765B-TzT-29;unclassified	100	30	28	0	12	15	0	1	9	5
0.1.5.19.1.1	Bacteria;BD1-5;uncultured_bacterium;unclassified;unclassified	98	39	10	0	5	5	1	7	11	20
0.1.30.1.4.7	Bacteria;Elusimicrobia;Elusimicrobia;Lineage_IIa;uncultured_bacterium	97	54	28	3	1	7	1	0	3	0
0.1.31.1.1.5	Bacteria;Fibrobacteres;Fibrobacteria;Fibrobacterales;FD035	96	4	4	3	14	11	13	44	1	2
0.1.42.1.1.1	Bacteria;Nitrospirae;Nitrospira;Nitrospirales;0319-6A21	96	38	43	0	4	9	1	0	1	0
0.1.23.2.1.2	Bacteria;Chlorobi;Ignavibacteria;Ignavibacteriales;BSV26	93	42	23	0	5	13	1	1	8	0
0.1.26.4.4.3	Bacteria;Cyanobacteria;Melainabacteria;Vampirovibrionales;unclassified	92	4	6	0	24	18	0	6	18	16
0.1.32.2.2.23	Bacteria;Firmicutes;Clostridia;Clostridiales;Lachnospiraceae	91	25	24	1	10	21	1	2	3	4
0.1.46.2.1.1	Bacteria;RsaHF231;uncultured_bacterium;unclassified;unclassified	88	23	20	0	1	2	5	14	4	19
0.1.58.5.1.7	Bacteria;Verrucomicrobia;Spartobacteria;Chthoniobacterales;unclassified	86	7	10	0	18	25	0	3	10	13
0.1.44.7.14.3	Bacteria;Planctomycetes;Phycisphaerae;S-70;uncultured_bacterium	85	24	26	0	13	15	0	0	3	4
0.1.6.7.1.1	Bacteria;BHI80-139;uncultured_Geobacillus_sp.;unclassified;unclassified	81	12	21	0	9	11	0	0	12	16
0.1.5.31.1.1	Bacteria;BD1-5;uncultured_sludge_bacterium;unclassified;unclassified	80	20	2	0	7	5	0	5	16	25
0.1.45.7.14.12	Bacteria;Proteobacteria;Deltaproteobacteria;Myxococcales;Phaselicystidaceae	80	14	20	19	7	12	4	2	1	1
0.1.30.1.7.4	Bacteria;Elusimicrobia;Elusimicrobia;Lineage_IV;uncultured_Termite_group_1_bacterium	79	42	28	1	2	4	1	1	0	0
0.1.45.9.4.1	Bacteria;Proteobacteria;Epsilonproteobacteria;Campylobacterales;Campylobacteraceae	78	28	29	0	4	5	1	0	0	11
0.1.24.3.1.1	Bacteria;Chloroflexi;Caldilineae;Caldilineales;Caldilineaceae	77	15	16	1	9	7	4	4	9	12
0.1.45.7.9.4	Bacteria;Proteobacteria;Deltaproteobacteria;Desulfovibrionales;Desulfovibrionaceae	77	11	12	0	25	18	0	3	4	4
0.1.59.1.1.1	Bacteria;WCHB1-60;unclassified;unclassified;unclassified	77	5	2	3	9	15	7	8	8	20
0.1.7.9.11.1	Bacteria;Bacteroidetes;SB-1;uncultured_Bacteroidetes_bacterium;unclassified	74	0	0	0	28	36	0	4	2	4
0.1.7.13.1.1	Bacteria;Bacteroidetes;Sphingobacteriia;Sphingobacteriales;AKYH767	74	39	29	0	1	1	1	0	3	0
0.1.30.1.4.8	Bacteria;Elusimicrobia;Elusimicrobia;Lineage_IIa;uncultured_soil_bacterium	74	39	26	0	3	6	0	0	0	0
0.1.45.11.51.8	Bacteria;Proteobacteria;Gammaproteobacteria;Thiotrichales;Thiotrichaceae	74	15	22	4	8	11	0	1	7	6
0.1.32.2.2.26	Bacteria;Firmicutes;Clostridia;Clostridiales;Peptococcaceae	73	3	0	7	12	10	4	33	1	3
0.1.45.7.8.3	Bacteria;Proteobacteria;Deltaproteobacteria;Desulfobacterales;Nitrospinaceae	73	31	21	0	9	8	0	0	3	1
0.1.45.11.33.3	Bacteria;Proteobacteria;Gammaproteobacteria;Methylococcales;Crenotrichaceae	73	32	34	0	1	5	0	0	1	0
0.1.2.2.13.6	Bacteria;Actinobacteria;Actinobacteria;PeM15;unclassified	72	26	33	0	0	2	2	1	3	5
0.1.45.4.16.16	Bacteria;Proteobacteria;Alphaproteobacteria;Rickettsiales;TK34	72	17	23	2	10	12	0	0	4	4
0.1.15.9.1.1	Bacteria;Candidate_division_OP3;uncultured_Verrucomicrobia_bacterium;unclassified;unclassified	70	19	19	0	3	29	0	0	0	0
0.1.45.11.34.13	Bacteria;Proteobacteria;Gammaproteobacteria;NKB5;uncultured_proteobacterium	70	19	16	0	5	0	0	0	11	19
0.1.49.6.1.1	Bacteria;SHA-109;uncultured_bacterium;unclassified;unclassified	68	3	2	0	11	10	0	0	27	15
0.1.44.9.1.1	Bacteria;Planctomycetes;Pla4_lineage;unclassified;unclassified	66	25	30	0	5	4	0	0	2	0
0.1.24.22.1.1	Bacteria;Chloroflexi;unclassified;unclassified;unclassified	65	18	12	3	4	7	11	4	4	2
0.1.30.1.12.1	Bacteria;Elusimicrobia;Elusimicrobia;unclassified;unclassified	65	30	23	2	3	6	0	0	1	0
0.1.1.1.18.4	Bacteria;Acidobacteria;Acidobacteria;Subgroup_4;RB41	63	22	29	0	0	1	0	1	5	5
0.1.45.11.29.3	Bacteria;Proteobacteria;Gammaproteobacteria;KI89A_clade;unclassified	63	9	20	0	10	22	0	0	1	1
0.1.45.11.36.11	Bacteria;Proteobacteria;Gammaproteobacteria;Oceanospirillales;Halomonadaceae	63	30	24	0	0	3	0	0	4	2
0.1.32.1.2.7	Bacteria;Firmicutes;Bacilli;Bacillales;Paenibacillaceae	62	13	29	0	0	8	0	0	5	7
0.1.45.4.16.7	Bacteria;Proteobacteria;Alphaproteobacteria;Rickettsiales;RB446	62	4	3	0	11	3	1	0	19	21
0.1.45.11.36.6	Bacteria;Proteobacteria;Gammaproteobacteria;Oceanospirillales;CrystalBog021C3	62	5	3	4	22	8	0	0	12	8
0.1.26.4.1.2	Bacteria;Cyanobacteria;Melainabacteria;Caenarcaniphilales;uncultured_Gram-positive_bacterium	60	4	0	0	6	1	0	0	25	24
0.1.58.3.7.1	Bacteria;Verrucomicrobia;Opitutae;Puniceicoccales;Puniceicoccaceae	60	11	8	0	12	29	0	0	0	0
0.1.45.11.54.3	Bacteria;Proteobacteria;Gammaproteobacteria;Xanthomonadales;Nevskiaceae	58	30	24	0	0	2	0	0	2	0
0.1.7.9.9.1	Bacteria;Bacteroidetes;SB-1;unclassified;unclassified	57	0	2	0	20	26	2	4	3	0
0.1.33.1.1.5	Bacteria;Fusobacteria;Fusobacteriia;Fusobacteriales;Leptotrichiaceae	55	13	16	0	7	16	1	0	0	2
0.1.45.7.11.18	Bacteria;Proteobacteria;Deltaproteobacteria;Desulfuromonadales;unclassified	55	4	20	0	16	12	0	0	1	2
0.1.45.11.31.3	Bacteria;Proteobacteria;Gammaproteobacteria;Legionellales;unclassified	55	8	3	1	0	1	0	0	13	29
0.1.1.1.20.61	Bacteria;Acidobacteria;Acidobacteria;Subgroup_6;uncultured_prokaryote	54	11	12	0	10	14	0	0	2	5
0.1.45.11.36.23	Bacteria;Proteobacteria;Gammaproteobacteria;Oceanospirillales;Oleiphilaceae	54	21	25	0	3	5	0	0	0	0
0.1.20.6.1.1	Bacteria;Candidate_division_WS3;unclassified;unclassified;unclassified	53	19	20	0	6	4	0	0	3	1
0.1.45.7.8.2	Bacteria;Proteobacteria;Deltaproteobacteria;Desulfobacterales;Desulfobulbaceae	52	10	9	0	6	12	0	0	6	9
0.1.2.11.1.1	Bacteria;Actinobacteria;Thermoleophilia;Gaiellales;Gaiellaceae	51	16	18	0	2	4	0	0	4	7
0.1.44.7.5.2	Bacteria;Planctomycetes;Phycisphaerae;CCM11a;unclassified	51	16	16	0	6	10	0	0	1	2
0.1.45.7.14.16	Bacteria;Proteobacteria;Deltaproteobacteria;Myxococcales;mle1-27	51	6	15	2	15	9	1	2	0	1
0.1.7.6.1.8	Bacteria;Bacteroidetes;Flavobacteriia;Flavobacteriales;unclassified	50	19	8	0	5	8	0	0	5	5
0.1.44.7.17.16	Bacteria;Planctomycetes;Phycisphaerae;WD2101_soil_group;uncultured_planctomycete	50	0	0	0	13	12	0	0	14	11
0.1.58.5.1.3	Bacteria;Verrucomicrobia;Spartobacteria;Chthoniobacterales;DA101_soil_group	50	13	27	0	0	0	1	0	6	3
0.1.2.1.1.7	Bacteria;Actinobacteria;Acidimicrobiia;Acidimicrobiales;uncultured	49	8	14	0	10	7	0	0	4	6
0.1.45.11.54.7	Bacteria;Proteobacteria;Gammaproteobacteria;Xanthomonadales;unclassified	49	8	4	1	4	4	8	15	4	1
0.1.1.1.10.1	Bacteria;Acidobacteria;Acidobacteria;Subgroup_17;unclassified	48	12	18	0	6	6	0	0	3	3
0.1.1.1.19.7	Bacteria;Acidobacteria;Acidobacteria;Subgroup_5;uncultured_bacterium	48	20	20	2	1	4	1	0	0	0
0.1.7.4.1.28	Bacteria;Bacteroidetes;Bacteroidia;Bacteroidales;unclassified	48	10	5	1	1	3	8	15	1	4
0.1.54.15.1.1	Bacteria;TM6;uncultured_candidate_division_TM6_bacterium;unclassified;unclassified	48	1	2	7	0	0	14	22	1	1
0.1.44.9.4.1	Bacteria;Planctomycetes;Pla4_lineage;uncultured_bacterium;unclassified	47	17	22	0	3	5	0	0	0	0
0.1.45.4.13.16	Bacteria;Proteobacteria;Alphaproteobacteria;Rhizobiales;F0723	47	3	3	0	4	4	15	1	8	9
0.1.44.6.6.1	Bacteria;Planctomycetes;OM190;uncultured_Planctomycetales_bacterium;unclassified	46	9	9	0	8	20	0	0	0	0
0.1.45.4.16.6	Bacteria;Proteobacteria;Alphaproteobacteria;Rickettsiales;LWSR-14	46	5	3	0	5	5	2	16	7	3
0.1.14.12.1.1	Bacteria;Candidate_division_OP11;uncultured_Microgenomates_bacterium;unclassified;unclassified	45	5	0	0	2	1	0	0	9	28
0.1.1.1.17.7	Bacteria;Acidobacteria;Acidobacteria;Subgroup_3;SJA-149	44	5	11	2	8	12	1	3	1	1
0.1.44.1.2.1	Bacteria;Planctomycetes;028H05-P-BN-P5;uncultured_bacterium;unclassified	44	22	18	0	0	4	0	0	0	0
0.1.44.14.4.1	Bacteria;Planctomycetes;vadinHA49;uncultured_Antarctic_bacterium_LB3-13;unclassified	44	19	22	1	0	2	0	0	0	0
0.1.45.6.15.11	Bacteria;Proteobacteria;Betaproteobacteria;SC-I-84;unclassified	44	14	25	0	0	0	0	0	0	5
0.1.45.11.51.2	Bacteria;Proteobacteria;Gammaproteobacteria;Thiotrichales;CHAB-XI-27	44	8	5	1	8	15	0	0	5	2
0.1.7.15.2.1	Bacteria;Bacteroidetes;WCHB1-32;unclassified;unclassified	43	4	10	0	11	14	0	0	1	3
0.1.2.2.11.16	Bacteria;Actinobacteria;Actinobacteria;Micrococcales;Micrococcaceae	41	7	8	0	0	2	1	0	2	21
0.1.2.12.1.1	Bacteria;Actinobacteria;unclassified;unclassified;unclassified	40	7	8	1	2	0	3	4	3	12
0.1.26.3.7.1	Bacteria;Cyanobacteria;ML635J-21;uncultured_bacterium;unclassified	40	7	7	0	15	10	0	0	1	0
0.1.27.1.1.4	Bacteria;Deferribacteres;Deferribacteres;Deferribacterales;PAUC34f	40	16	8	0	4	9	0	0	3	0
0.1.45.6.3.3	Bacteria;Proteobacteria;Betaproteobacteria;B1-7BS;uncultured_bacterium	40	14	12	0	10	3	0	0	0	1
0.1.45.7.14.4	Bacteria;Proteobacteria;Deltaproteobacteria;Myxococcales;Elev-16S-1158	40	18	20	0	2	0	0	0	0	0
0.1.58.3.13.7	Bacteria;Verrucomicrobia;Opitutae;vadinHA64;uncultured_bacterium	40	24	15	0	1	0	0	0	0	0
0.1.7.14.8.1	Bacteria;Bacteroidetes;VC2.1_Bac22;uncultured_Sphingobacteria_bacterium;unclassified	39	0	0	2	3	1	23	8	2	0
0.1.26.4.3.2	Bacteria;Cyanobacteria;Melainabacteria;Obscuribacterales;unclassified	39	17	14	0	3	2	0	0	2	1
0.1.45.20.16.1	Bacteria;Proteobacteria;TA18;uncultured_delta_proteobacterium;unclassified	39	0	1	0	2	6	0	0	5	25
0.1.1.2.7.1	Bacteria;Acidobacteria;Holophagae;Subgroup_10;ABS-19	38	11	25	0	0	1	0	0	1	0
0.1.30.1.10.1	Bacteria;Elusimicrobia;Elusimicrobia;MVP-88;unclassified	38	22	15	0	1	0	0	0	0	0
0.1.45.7.11.10	Bacteria;Proteobacteria;Deltaproteobacteria;Desulfuromonadales;Geobacteraceae	38	6	3	0	4	15	2	2	1	5
0.1.1.3.1.1	Bacteria;Acidobacteria;Subgroup_22;unclassified;unclassified	37	5	20	0	5	2	0	0	2	3
0.1.7.15.6.1	Bacteria;Bacteroidetes;WCHB1-32;uncultured_bacterium;unclassified	37	3	7	0	7	19	0	0	0	1
0.1.26.4.5.1	Bacteria;Cyanobacteria;Melainabacteria;unclassified;unclassified	37	2	4	0	6	6	0	2	7	10
0.1.41.7.1.1	Bacteria;NPL-UPA2;uncultured_bacterium;unclassified;unclassified	37	17	13	0	3	2	0	1	0	1
0.1.2.11.1.3	Bacteria;Actinobacteria;Thermoleophilia;Gaiellales;uncultured	36	11	12	0	3	2	0	0	1	7
0.1.4.1.1.2	Bacteria;Armatimonadetes;Armatimonadia;Armatimonadales;unclassified	36	7	8	0	0	4	2	5	8	2
0.1.13.16.1.1	Bacteria;Candidate_division_OD1;uncultured_Parcubacteria_bacterium;unclassified;unclassified	36	2	0	2	2	2	8	14	1	5
0.1.30.1.5.1	Bacteria;Elusimicrobia;Elusimicrobia;Lineage_IIb;unclassified	36	20	6	0	2	5	0	1	1	1
0.1.40.12.1.1	Bacteria;Lentisphaerae;Lentisphaeria;Lentisphaerales;Lentisphaeraceae	36	15	17	0	0	4	0	0	0	0
0.1.44.6.4.1	Bacteria;Planctomycetes;OM190;uncultured_Planctomyces_sp.;unclassified	36	14	10	0	5	6	0	0	0	1
0.1.58.8.1.2	Bacteria;Verrucomicrobia;Verrucomicrobiae;Verrucomicrobiales;DEV007	36	3	5	0	4	9	0	1	5	9
0.1.7.12.2.1	Bacteria;Bacteroidetes;SM1A07;unclassified;unclassified	35	3	4	1	5	17	1	1	1	2
0.1.20.8.1.1	Bacteria;Candidate_division_WS3;uncultured_Acidobacterium_sp.;unclassified;unclassified	35	12	8	0	3	3	1	0	6	2
0.1.24.20.4.1	Bacteria;Chloroflexi;TK10;unclassified;unclassified	35	14	8	1	3	1	2	0	2	4
0.1.45.11.2.2	Bacteria;Proteobacteria;Gammaproteobacteria;195up;uncultured_bacterium	35	16	19	0	0	0	0	0	0	0
0.1.45.11.34.2	Bacteria;Proteobacteria;Gammaproteobacteria;NKB5;Legionella-like_amoebal_pathogen_HT99	35	6	2	0	0	2	0	0	7	18
0.1.49.5.1.1	Bacteria;SHA-109;uncultured_alpha_proteobacterium;unclassified;unclassified	35	2	1	1	5	5	0	0	11	10
0.1.58.2.25.1	Bacteria;Verrucomicrobia;OPB35_soil_group;uncultured_Verrucomicrobia_bacterium;unclassified	35	13	16	0	3	3	0	0	0	0
0.1.1.1.20.30	Bacteria;Acidobacteria;Acidobacteria;Subgroup_6;uncultured_bacterium	34	10	13	0	6	5	0	0	0	0
0.1.10.10.1.1	Bacteria;Candidate_division_BRC1;uncultured_bacterium;unclassified;unclassified	34	8	15	0	5	2	0	0	1	3
0.1.26.4.3.8	Bacteria;Cyanobacteria;Melainabacteria;Obscuribacterales;uncultured_cyanobacterium	33	12	12	0	3	5	0	1	0	0
0.1.45.7.20.1	Bacteria;Proteobacteria;Deltaproteobacteria;Syntrophobacterales;Syntrophaceae	33	3	5	0	8	10	1	3	0	3
0.1.45.11.38.1	Bacteria;Proteobacteria;Gammaproteobacteria;Order_Incertae_Sedis;Family_Incertae_Sedis	33	5	23	0	1	2	0	0	0	2
0.1.2.2.15.1	Bacteria;Actinobacteria;Actinobacteria;Pseudonocardiales;Pseudonocardiaceae	32	10	21	0	0	0	0	0	0	1
0.1.4.2.1.1	Bacteria;Armatimonadetes;Chthonomonadetes;Chthonomonadales;Chthonomonadaceae	32	7	5	0	2	7	3	0	3	5
0.1.45.6.12.1	Bacteria;Proteobacteria;Betaproteobacteria;Nitrosomonadales;Gallionellaceae	32	20	7	2	1	0	0	0	1	1
0.1.45.4.13.22	Bacteria;Proteobacteria;Alphaproteobacteria;Rhizobiales;KF-JG30-B3	31	9	14	0	2	5	0	0	1	0
0.1.53.5.1.1	Bacteria;TA06;uncultured_bacterium;unclassified;unclassified	31	2	0	0	14	7	0	0	5	3
0.1.4.1.1.1	Bacteria;Armatimonadetes;Armatimonadia;Armatimonadales;Armatimonadaceae	30	14	7	0	4	3	0	1	0	1
0.1.7.9.4.1	Bacteria;Bacteroidetes;SB-1;Bacteroidetes_bacterium_enrichment_culture_clone_VNC3B008;unclassified	30	0	0	0	0	0	8	22	0	0
0.1.22.1.1.1	Bacteria;Chlamydiae;Chlamydiae;Chlamydiales;Chlamydiaceae	30	9	8	1	3	0	0	0	4	5
0.1.45.4.15.11	Bacteria;Proteobacteria;Alphaproteobacteria;Rhodospirillales;MNC12	30	8	7	0	1	11	1	0	2	0
0.1.45.7.16.6	Bacteria;Proteobacteria;Deltaproteobacteria;SAR324_clade(Marine_group_B);unclassified	30	16	14	0	0	0	0	0	0	0
0.1.58.2.10.1	Bacteria;Verrucomicrobia;OPB35_soil_group;bacterium_Ellin517;unclassified	30	8	12	0	3	6	0	0	1	0
0.1.2.2.10.1	Bacteria;Actinobacteria;Actinobacteria;Kineosporiales;Kineosporiaceae	29	11	17	0	1	0	0	0	0	0
0.1.19.25.1.1	Bacteria;Candidate_division_TM7;uncultured_bacterium;unclassified;unclassified	29	1	0	0	0	2	0	0	3	23
0.1.8.3.1.1	Bacteria;CKC4;uncultured_bacterium;unclassified;unclassified	29	0	0	0	11	9	0	0	2	7
0.1.32.1.2.14	Bacteria;Firmicutes;Bacilli;Bacillales;unclassified	29	9	8	0	0	0	0	0	2	10
0.1.32.2.2.13	Bacteria;Firmicutes;Clostridia;Clostridiales;Family_XIII	29	8	3	0	6	3	0	8	0	1
0.1.36.1.2.3	Bacteria;Gemmatimonadetes;Gemmatimonadetes;BD2-11_terrestrial_group;unclassified	29	10	7	0	6	3	0	1	2	0
0.1.1.1.3.1	Bacteria;Acidobacteria;Acidobacteria;Acidobacteriales;Acidobacteriaceae_(Subgroup_1)	28	3	20	0	1	2	0	0	2	0
0.1.2.2.8.4	Bacteria;Actinobacteria;Actinobacteria;Frankiales;Geodermatophilaceae	28	12	6	0	2	3	0	0	1	4
0.1.2.2.12.1	Bacteria;Actinobacteria;Actinobacteria;Micromonosporales;Micromonosporaceae	28	19	7	0	0	0	1	0	0	1
0.1.7.14.4.1	Bacteria;Bacteroidetes;VC2.1_Bac22;unclassified;unclassified	28	6	6	0	5	5	1	0	2	3
0.1.26.4.3.4	Bacteria;Cyanobacteria;Melainabacteria;Obscuribacterales;uncultured_Gloeobacter_sp.	28	2	3	0	12	10	1	0	0	0
0.1.32.1.5.4	Bacteria;Firmicutes;Bacilli;Lactobacillales;Enterococcaceae	28	7	4	0	5	5	0	0	2	5
0.1.44.7.5.6	Bacteria;Planctomycetes;Phycisphaerae;CCM11a;uncultured_bacterium	28	6	10	0	4	7	0	0	0	1
0.1.1.1.20.22	Bacteria;Acidobacteria;Acidobacteria;Subgroup_6;uncultured_Acidobacterium_sp.	27	3	9	0	5	10	0	0	0	0
0.1.13.25.1.1	Bacteria;Candidate_division_OD1;uncultured_eubacterium_WCHB1-58;unclassified;unclassified	27	2	2	0	2	0	0	0	13	8
0.1.17.3.1.1	Bacteria;Candidate_division_OP9;unclassified;unclassified;unclassified	27	0	0	3	0	0	8	15	0	1
0.1.24.17.4.1	Bacteria;Chloroflexi;SAR202_clade;unclassified;unclassified	27	10	13	1	0	2	0	0	1	0
0.1.32.2.2.4	Bacteria;Firmicutes;Clostridia;Clostridiales;Clostridiaceae_2	27	1	0	1	2	12	0	9	0	2
0.1.44.2.5.1	Bacteria;Planctomycetes;BD7-11;uncultured_bacterium;unclassified	27	4	11	0	3	9	0	0	0	0
0.1.45.7.14.3	Bacteria;Proteobacteria;Deltaproteobacteria;Myxococcales;Cystobacteraceae	27	8	9	0	3	5	0	2	0	0
0.1.45.11.54.2	Bacteria;Proteobacteria;Gammaproteobacteria;Xanthomonadales;JTB255_marine_benthic_group	27	10	17	0	0	0	0	0	0	0
0.1.32.1.2.9	Bacteria;Firmicutes;Bacilli;Bacillales;Planococcaceae	26	8	4	0	1	0	0	0	1	12
0.1.45.4.15.10	Bacteria;Proteobacteria;Alphaproteobacteria;Rhodospirillales;KCM-B-60	26	4	10	0	5	7	0	0	0	0
0.1.49.3.1.1	Bacteria;SHA-109;uncultured_Acidobacteria_bacterium;unclassified;unclassified	26	0	0	2	1	1	0	14	4	4
0.1.2.2.14.2	Bacteria;Actinobacteria;Actinobacteria;Propionibacteriales;Propionibacteriaceae	25	13	12	0	0	0	0	0	0	0
0.1.5.20.1.1	Bacteria;BD1-5;uncultured_bacterium_GKS2-174;unclassified;unclassified	25	4	1	0	5	5	0	0	3	7
0.1.44.14.5.1	Bacteria;Planctomycetes;vadinHA49;uncultured_Antarctic_bacterium_LB3-147;unclassified	25	1	2	1	6	8	0	0	3	4
0.1.2.1.1.1	Bacteria;Actinobacteria;Acidimicrobiia;Acidimicrobiales;Acidimicrobiaceae	24	7	9	0	2	0	0	1	1	4
0.1.45.4.13.6	Bacteria;Proteobacteria;Alphaproteobacteria;Rhizobiales;BCf3-20	24	7	2	0	3	0	0	0	3	9
0.1.45.4.13.18	Bacteria;Proteobacteria;Alphaproteobacteria;Rhizobiales;FukuN57	24	6	6	0	2	5	0	0	0	5
0.1.45.7.13.24	Bacteria;Proteobacteria;Deltaproteobacteria;GR-WP33-30;uncultured_prokaryote	24	9	12	0	1	1	0	0	0	1
0.1.58.5.1.10	Bacteria;Verrucomicrobia;Spartobacteria;Chthoniobacterales;zEL20	24	0	0	0	3	3	0	1	7	10
0.1.59.8.1.1	Bacteria;WCHB1-60;uncultured_candidate_division_WS5_bacterium;unclassified;unclassified	24	3	1	0	2	0	0	2	3	13
0.1.32.2.2.2	Bacteria;Firmicutes;Clostridia;Clostridiales;Christensenellaceae	23	7	6	2	2	4	0	0	0	2
0.1.44.9.2.1	Bacteria;Planctomycetes;Pla4_lineage;uncultured_Planctomycetaceae_bacterium;unclassified	23	4	8	0	3	8	0	0	0	0
0.1.45.11.51.7	Bacteria;Proteobacteria;Gammaproteobacteria;Thiotrichales;Piscirickettsiaceae	23	1	0	0	1	14	1	1	3	2
0.1.1.2.7.2	Bacteria;Acidobacteria;Holophagae;Subgroup_10;CA002	22	4	15	0	3	0	0	0	0	0
0.1.14.4.1.1	Bacteria;Candidate_division_OP11;Microgenomates_bacterium_SCGC_AAA011-L6;unclassified;unclassified	22	2	1	0	1	0	0	0	1	17
0.1.44.7.5.3	Bacteria;Planctomycetes;Phycisphaerae;CCM11a;uncultured_Planctomycetaceae_bacterium	22	9	8	0	2	2	0	0	0	1
0.1.45.9.4.2	Bacteria;Proteobacteria;Epsilonproteobacteria;Campylobacterales;Helicobacteraceae	22	10	7	0	1	1	0	0	1	2
0.1.45.11.34.3	Bacteria;Proteobacteria;Gammaproteobacteria;NKB5;Trachelomonas_scabra	22	4	9	0	4	4	0	0	1	0
0.1.45.13.3.1	Bacteria;Proteobacteria;MACA-EFT26;uncultured_bacterium;unclassified	22	8	8	0	4	2	0	0	0	0
0.1.54.24.1.1	Bacteria;TM6;uncultured_soil_bacterium;unclassified;unclassified	22	6	5	0	2	0	0	0	6	3
0.1.2.2.6.3	Bacteria;Actinobacteria;Actinobacteria;Corynebacteriales;Dietziaceae	21	18	1	0	0	1	1	0	0	0
0.1.4.9.1.1	Bacteria;Armatimonadetes;uncultured_Armatimonadetes_bacterium;unclassified;unclassified	21	5	7	0	2	2	0	1	2	2
0.1.32.1.5.13	Bacteria;Firmicutes;Bacilli;Lactobacillales;Streptococcaceae	21	10	6	0	2	1	1	0	0	1
0.1.44.8.3.1	Bacteria;Planctomycetes;Pla3_lineage;uncultured_bacterium;unclassified	21	8	11	0	1	1	0	0	0	0
0.1.23.1.1.3	Bacteria;Chlorobi;Chlorobia;Chlorobiales;SJA-28	20	2	4	1	1	3	1	0	1	7
0.1.32.1.5.3	Bacteria;Firmicutes;Bacilli;Lactobacillales;Carnobacteriaceae	20	8	10	1	0	1	0	0	0	0
0.1.44.8.1.1	Bacteria;Planctomycetes;Pla3_lineage;unclassified;unclassified	20	11	7	0	1	1	0	0	0	0
0.1.45.4.13.11	Bacteria;Proteobacteria;Alphaproteobacteria;Rhizobiales;C2U	20	13	7	0	0	0	0	0	0	0
0.1.45.4.15.4	Bacteria;Proteobacteria;Alphaproteobacteria;Rhodospirillales;B79	20	11	8	1	0	0	0	0	0	0
0.1.45.4.16.21	Bacteria;Proteobacteria;Alphaproteobacteria;Rickettsiales;uncultured_alpha_proteobacterium	20	4	3	0	5	7	0	0	1	0
0.1.1.2.6.1	Bacteria;Acidobacteria;Holophagae;Holophagales;Holophagaceae	19	0	7	0	3	4	0	2	1	2
0.1.24.9.6.1	Bacteria;Chloroflexi;JG30-KF-CM66;uncultured_bacterium;unclassified	19	5	4	0	2	0	0	0	3	5
0.1.40.25.1.1	Bacteria;Lentisphaerae;unclassified;unclassified;unclassified	19	7	8	0	2	2	0	0	0	0
0.1.45.11.51.9	Bacteria;Proteobacteria;Gammaproteobacteria;Thiotrichales;Thiotrichales_Incertae_Sedis	19	0	3	0	7	9	0	0	0	0
0.1.45.18.7.1	Bacteria;Proteobacteria;SPOTSOCT00m83;uncultured_sulfur-oxidizing_symbiont_bacterium;unclassified	19	1	2	0	6	5	0	0	1	4
0.1.49.4.1.1	Bacteria;SHA-109;uncultured_Firmicutes_bacterium;unclassified;unclassified	19	3	5	0	2	1	0	0	3	5
0.1.53.2.1.1	Bacteria;TA06;unclassified;unclassified;unclassified	19	2	4	0	2	2	1	4	4	0
0.1.2.1.1.6	Bacteria;Actinobacteria;Acidimicrobiia;Acidimicrobiales;unclassified	18	4	0	0	3	2	1	1	2	5
0.1.19.17.1.1	Bacteria;Candidate_division_TM7;metal-contaminated_soil_clone_K20-12;unclassified;unclassified	18	1	0	0	0	1	0	0	0	16
0.1.30.1.5.8	Bacteria;Elusimicrobia;Elusimicrobia;Lineage_IIb;uncultured_soil_bacterium	18	11	0	1	2	2	1	0	1	0
0.1.44.6.13.1	Bacteria;Planctomycetes;OM190;uncultured_soil_bacterium;unclassified	18	6	9	0	1	2	0	0	0	0
0.1.45.4.6.7	Bacteria;Proteobacteria;Alphaproteobacteria;DB1-14;uncultured_alpha_proteobacterium	18	2	2	0	4	0	2	7	1	0
0.1.45.4.13.4	Bacteria;Proteobacteria;Alphaproteobacteria;Rhizobiales;Aurantimonadaceae	18	8	6	1	0	0	3	0	0	0
0.1.45.7.11.9	Bacteria;Proteobacteria;Deltaproteobacteria;Desulfuromonadales;GR-WP33-58	18	5	6	0	3	4	0	0	0	0
0.1.45.16.9.1	Bacteria;Proteobacteria;SC3-20;uncultured_sulfur-oxidizing_symbiont_bacterium;unclassified	18	6	2	0	4	6	0	0	0	0
0.1.45.18.6.1	Bacteria;Proteobacteria;SPOTSOCT00m83;uncultured_proteobacterium;unclassified	18	3	5	0	3	7	0	0	0	0
0.1.1.1.20.59	Bacteria;Acidobacteria;Acidobacteria;Subgroup_6;uncultured_organism	17	3	2	0	1	5	0	0	1	5
0.1.2.2.11.12	Bacteria;Actinobacteria;Actinobacteria;Micrococcales;Intrasporangiaceae	17	9	6	0	0	0	0	0	1	1
0.1.44.2.1.1	Bacteria;Planctomycetes;BD7-11;unclassified;unclassified	17	4	4	0	2	3	0	0	2	2
0.1.45.4.20.1	Bacteria;Proteobacteria;Alphaproteobacteria;Sneathiellales;Sneathiellaceae	17	7	2	0	5	3	0	0	0	0
0.1.45.7.11.5	Bacteria;Proteobacteria;Deltaproteobacteria;Desulfuromonadales;BVA18	17	0	4	0	4	8	0	0	1	0
0.1.45.11.33.12	Bacteria;Proteobacteria;Gammaproteobacteria;Methylococcales;pLW-20	17	10	7	0	0	0	0	0	0	0
0.1.1.3.4.1	Bacteria;Acidobacteria;Subgroup_22;uncultured_Acidobacteriales_bacterium;unclassified	16	8	4	0	0	2	0	0	1	1
0.1.7.4.1.19	Bacteria;Bacteroidetes;Bacteroidia;Bacteroidales;Prevotellaceae	16	6	5	0	3	1	0	1	0	0
0.1.23.2.1.10	Bacteria;Chlorobi;Ignavibacteria;Ignavibacteriales;SR-FBR-L83	16	0	0	0	3	2	1	9	1	0
0.1.24.23.9.1	Bacteria;Chloroflexi;uncultured;uncultured_bacterium;unclassified	16	3	3	3	0	1	0	5	1	0
0.1.26.3.1.1	Bacteria;Cyanobacteria;ML635J-21;Azospirillum_sp._enrichment_culture_clone_yan50;unclassified	16	3	13	0	0	0	0	0	0	0
0.1.26.3.17.1	Bacteria;Cyanobacteria;ML635J-21;unidentified;unclassified	16	5	4	0	3	2	0	0	0	2
0.1.32.2.2.39	Bacteria;Firmicutes;Clostridia;Clostridiales;vadinBB60	16	13	1	0	1	0	1	0	0	0
0.1.40.12.2.1	Bacteria;Lentisphaerae;Lentisphaeria;Victivallales;Victivallaceae	16	3	3	0	6	3	0	0	1	0
0.1.45.7.5.3	Bacteria;Proteobacteria;Deltaproteobacteria;DTB120;uncultured_bacterium	16	0	1	0	0	0	3	12	0	0
0.1.2.1.1.4	Bacteria;Actinobacteria;Acidimicrobiia;Acidimicrobiales;OM1_clade	15	2	2	0	1	1	0	1	3	5
0.1.7.12.5.1	Bacteria;Bacteroidetes;SM1A07;uncultured_Flexibacter_sp.;unclassified	15	0	0	0	1	8	0	1	4	1
0.1.26.2.8.2	Bacteria;Cyanobacteria;Cyanobacteria;SubsectionIV;FamilyII	15	3	2	0	0	1	7	0	0	2
0.1.45.7.10.1	Bacteria;Proteobacteria;Deltaproteobacteria;Desulfurellales;Desulfurellaceae	15	3	10	0	0	1	0	0	0	1
0.1.45.7.18.12	Bacteria;Proteobacteria;Deltaproteobacteria;Sh765B-TzT-29;uncultured_Pelobacteraceae_bacterium	15	0	7	0	4	4	0	0	0	0
0.1.45.11.3.9	Bacteria;Proteobacteria;Gammaproteobacteria;34P16;uncultured_soil_bacterium	15	8	7	0	0	0	0	0	0	0
0.1.1.3.6.1	Bacteria;Acidobacteria;Subgroup_22;uncultured_bacterium;unclassified	14	5	4	0	0	0	1	0	3	1
0.1.2.2.8.8	Bacteria;Actinobacteria;Actinobacteria;Frankiales;uncultured	14	7	6	0	0	0	0	0	0	1
0.1.2.11.2.12	Bacteria;Actinobacteria;Thermoleophilia;Solirubrobacterales;Solirubrobacteraceae	14	2	12	0	0	0	0	0	0	0
0.1.12.10.1.1	Bacteria;Candidate_division_KB1;uncultured_bacterium;unclassified;unclassified	14	0	0	2	1	2	3	6	0	0
0.1.32.1.5.14	Bacteria;Firmicutes;Bacilli;Lactobacillales;unclassified	14	0	0	0	9	2	0	0	1	2
0.1.32.2.2.19	Bacteria;Firmicutes;Clostridia;Clostridiales;Gracilibacteraceae	14	0	4	0	1	2	1	3	0	3
0.1.44.7.18.5	Bacteria;Planctomycetes;Phycisphaerae;mle1-8;uncultured_bacterium	14	3	1	0	0	0	0	1	4	5
0.1.45.4.13.33	Bacteria;Proteobacteria;Alphaproteobacteria;Rhizobiales;Rhodobiaceae	14	2	7	0	0	0	1	0	1	3
0.1.45.7.11.15	Bacteria;Proteobacteria;Deltaproteobacteria;Desulfuromonadales;M20-Pitesti	14	7	6	0	0	1	0	0	0	0
0.1.45.18.1.1	Bacteria;Proteobacteria;SPOTSOCT00m83;unclassified;unclassified	14	3	5	0	3	2	0	0	1	0
0.1.58.2.38.1	Bacteria;Verrucomicrobia;OPB35_soil_group;uncultured_verrucomicrobium_DEV059;unclassified	14	3	10	0	0	1	0	0	0	0
0.1.1.1.19.2	Bacteria;Acidobacteria;Acidobacteria;Subgroup_5;uncultured_Acidobacteria_bacterium	13	6	6	0	1	0	0	0	0	0
0.1.1.1.19.4	Bacteria;Acidobacteria;Acidobacteria;Subgroup_5;uncultured_Acidobacteriales_bacterium	13	6	6	0	1	0	0	0	0	0
0.1.2.6.1.1	Bacteria;Actinobacteria;MB-A2-108;unclassified;unclassified	13	4	9	0	0	0	0	0	0	0
0.1.24.5.3.1	Bacteria;Chloroflexi;Chloroflexia;Herpetosiphonales;Herpetosiphonaceae	13	1	3	0	3	1	0	0	1	4
0.1.44.14.2.1	Bacteria;Planctomycetes;vadinHA49;bacterium_UW_659-2-F09;unclassified	13	2	7	0	4	0	0	0	0	0
0.1.45.4.16.2	Bacteria;Proteobacteria;Alphaproteobacteria;Rickettsiales;Anaplasmataceae	13	9	3	0	0	0	0	0	0	1
0.1.45.11.37.1	Bacteria;Proteobacteria;Gammaproteobacteria;Orbales;Orbaceae	13	4	5	1	3	0	0	0	0	0
0.1.55.1.6.2	Bacteria;Tenericutes;Mollicutes;Entomoplasmatales;Entomoplasmatales_Incertae_Sedis	13	9	3	0	0	1	0	0	0	0
0.1.59.5.1.1	Bacteria;WCHB1-60;uncultured_Clostridium_sp.;unclassified;unclassified	13	1	1	0	2	3	0	0	1	5
0.1.23.3.1.1	Bacteria;Chlorobi;unclassified;unclassified;unclassified	12	0	1	0	0	8	0	2	0	1
0.1.26.4.2.4	Bacteria;Cyanobacteria;Melainabacteria;Gastranaerophilales;unclassified	12	1	0	0	7	1	1	1	0	1
0.1.26.4.2.7	Bacteria;Cyanobacteria;Melainabacteria;Gastranaerophilales;uncultured_bacterium	12	3	3	0	1	1	0	2	1	1
0.1.44.7.19.1	Bacteria;Planctomycetes;Phycisphaerae;unclassified;unclassified	12	3	3	0	1	1	0	1	0	3
0.1.44.14.8.1	Bacteria;Planctomycetes;vadinHA49;uncultured_bacterium;unclassified	12	5	6	0	0	1	0	0	0	0
0.1.45.4.6.10	Bacteria;Proteobacteria;Alphaproteobacteria;DB1-14;uncultured_eubacterium_WD2107	12	5	5	0	0	0	0	0	2	0
0.1.45.4.16.13	Bacteria;Proteobacteria;Alphaproteobacteria;Rickettsiales;SM1B06	12	0	2	0	5	1	0	0	3	1
0.1.45.6.3.1	Bacteria;Proteobacteria;Betaproteobacteria;B1-7BS;unclassified	12	3	6	0	0	2	0	0	0	1
0.1.45.6.16.16	Bacteria;Proteobacteria;Betaproteobacteria;TRA3-20;uncultured_bacterium	12	0	0	0	2	2	1	1	3	3
0.1.45.7.13.12	Bacteria;Proteobacteria;Deltaproteobacteria;GR-WP33-30;uncultured_Gemmatimonadetes_bacterium	12	1	1	0	2	3	0	0	0	5
0.1.45.7.13.25	Bacteria;Proteobacteria;Deltaproteobacteria;GR-WP33-30;uncultured_proteobacterium	12	1	9	0	0	1	1	0	0	0
0.1.45.11.51.6	Bacteria;Proteobacteria;Gammaproteobacteria;Thiotrichales;H2-104-2	12	8	1	0	2	1	0	0	0	0
0.1.51.1.14.5	Bacteria;Spirochaetae;Spirochaetes;Spirochaetales;PL-11B10	12	1	0	0	5	6	0	0	0	0
0.1.2.11.4.1	Bacteria;Actinobacteria;Thermoleophilia;unclassified;unclassified	11	4	3	0	2	1	0	0	0	1
0.1.7.12.6.1	Bacteria;Bacteroidetes;SM1A07;uncultured_bacterium;unclassified	11	0	0	6	1	1	0	3	0	0
0.1.18.6.1.1	Bacteria;Candidate_division_SR1;unclassified;unclassified;unclassified	11	2	2	0	1	0	0	0	3	3
0.1.22.1.1.2	Bacteria;Chlamydiae;Chlamydiae;Chlamydiales;Chlamydiales_Incertae_Sedis	11	6	5	0	0	0	0	0	0	0
0.1.24.5.2.5	Bacteria;Chloroflexi;Chloroflexia;Chloroflexales;Roseiflexaceae	11	3	7	0	0	0	0	0	0	1
0.1.24.17.15.1	Bacteria;Chloroflexi;SAR202_clade;uncultured_bacterium;unclassified	11	7	3	0	0	0	0	1	0	0
0.1.32.1.2.11	Bacteria;Firmicutes;Bacilli;Bacillales;Staphylococcaceae	11	0	4	0	0	2	0	2	2	1
0.1.40.16.4.1	Bacteria;Lentisphaerae;Oligosphaeria;unclassified;unclassified	11	4	4	0	1	2	0	0	0	0
0.1.44.12.2.1	Bacteria;Planctomycetes;SPG12-401-411-B72;uncultured_bacterium;unclassified	11	3	3	0	0	5	0	0	0	0
0.1.45.4.13.1	Bacteria;Proteobacteria;Alphaproteobacteria;Rhizobiales;1174-901-12	11	4	5	0	0	0	1	0	1	0
0.1.45.7.18.21	Bacteria;Proteobacteria;Deltaproteobacteria;Sh765B-TzT-29;uncultured_delta_proteobacterium	11	2	6	0	3	0	0	0	0	0
0.1.45.9.1.2	Bacteria;Proteobacteria;Epsilonproteobacteria;BG.g7;uncultured_Arcobacter_sp.	11	0	0	0	0	1	0	0	3	7
0.1.45.11.29.4	Bacteria;Proteobacteria;Gammaproteobacteria;KI89A_clade;uncultured_bacterium	11	3	2	0	1	5	0	0	0	0
0.1.45.11.34.11	Bacteria;Proteobacteria;Gammaproteobacteria;NKB5;uncultured_marine_bacterium	11	4	3	0	1	1	0	0	1	1
0.1.45.11.36.39	Bacteria;Proteobacteria;Gammaproteobacteria;Oceanospirillales;unclassified	11	2	0	1	0	6	0	2	0	0
0.1.58.8.1.4	Bacteria;Verrucomicrobia;Verrucomicrobiae;Verrucomicrobiales;Rubritaleaceae	11	7	4	0	0	0	0	0	0	0
0.1.59.7.1.1	Bacteria;WCHB1-60;uncultured_bacterium;unclassified;unclassified	11	4	2	1	0	0	0	0	1	3
0.1.1.1.20.21	Bacteria;Acidobacteria;Acidobacteria;Subgroup_6;uncultured_Acidobacteriales_bacterium	10	2	8	0	0	0	0	0	0	0
0.1.1.2.7.6	Bacteria;Acidobacteria;Holophagae;Subgroup_10;unclassified	10	2	5	0	0	1	0	0	0	2
0.1.2.11.2.9	Bacteria;Actinobacteria;Thermoleophilia;Solirubrobacterales;Patulibacteraceae	10	4	6	0	0	0	0	0	0	0
0.1.2.11.2.15	Bacteria;Actinobacteria;Thermoleophilia;Solirubrobacterales;unclassified	10	2	5	0	0	1	0	0	0	2
0.1.4.1.1.6	Bacteria;Armatimonadetes;Armatimonadia;Armatimonadales;uncultured_bacterium	10	1	2	0	0	2	0	3	1	1
0.1.4.2.1.7	Bacteria;Armatimonadetes;Chthonomonadetes;Chthonomonadales;uncultured_bacterium	10	6	2	0	0	1	0	0	0	1
0.1.7.5.5.1	Bacteria;Bacteroidetes;Cytophagia;unclassified;unclassified	10	3	3	0	1	0	0	0	2	1
0.1.7.17.3.1	Bacteria;Bacteroidetes;vadinHA17;unclassified;unclassified	10	0	1	0	1	0	0	6	2	0
0.1.13.6.1.1	Bacteria;Candidate_division_OD1;Unknown_Class;Unknown_Order;Unknown_Family	10	0	0	0	0	0	0	10	0	0
0.1.15.16.1.1	Bacteria;Candidate_division_OP3;uncultured_prokaryote;unclassified;unclassified	10	5	4	0	1	0	0	0	0	0
0.1.19.42.1.1	Bacteria;Candidate_division_TM7;uncultured_soil_bacterium;unclassified;unclassified	10	3	3	0	0	0	0	0	2	2
0.1.24.16.1.1	Bacteria;Chloroflexi;S085;unclassified;unclassified	10	1	3	0	0	0	0	0	4	2
0.1.26.2.8.1	Bacteria;Cyanobacteria;Cyanobacteria;SubsectionIV;FamilyI	10	6	1	0	0	0	3	0	0	0
0.1.32.1.5.5	Bacteria;Firmicutes;Bacilli;Lactobacillales;Lactobacillaceae	10	5	5	0	0	0	0	0	0	0
0.1.40.23.6.1	Bacteria;Lentisphaerae;WCHB1-41;uncultured_bacterium;unclassified	10	3	3	0	1	1	0	0	2	0
0.1.42.1.1.2	Bacteria;Nitrospirae;Nitrospira;Nitrospirales;4-29	10	5	4	0	0	0	0	1	0	0
0.1.41.13.1.1	Bacteria;NPL-UPA2;uncultured_planctomycete;unclassified;unclassified	10	6	2	0	0	2	0	0	0	0
0.1.45.4.16.3	Bacteria;Proteobacteria;Alphaproteobacteria;Rickettsiales;EF100-94H03	10	1	5	0	2	2	0	0	0	0
0.1.45.4.21.6	Bacteria;Proteobacteria;Alphaproteobacteria;Sphingomonadales;DSSF69	10	0	0	0	3	6	0	0	0	1
0.1.45.7.13.9	Bacteria;Proteobacteria;Deltaproteobacteria;GR-WP33-30;uncultured_Desulfuromonadales_bacterium	10	1	3	0	1	1	0	0	1	3
0.1.45.7.13.10	Bacteria;Proteobacteria;Deltaproteobacteria;GR-WP33-30;uncultured_Desulfuromonas_sp.	10	4	5	0	0	0	0	0	0	1
0.1.45.11.24.1	Bacteria;Proteobacteria;Gammaproteobacteria;Gammaproteobacteria_Incertae_Sedis;Unknown_Family	10	6	1	0	1	2	0	0	0	0
0.1.58.8.1.7	Bacteria;Verrucomicrobia;Verrucomicrobiae;Verrucomicrobiales;uncultured_bacterium	10	0	1	0	1	1	0	0	4	3
0.1.59.4.1.1	Bacteria;WCHB1-60;uncultured_Clostridiales_bacterium;unclassified;unclassified	10	0	1	0	0	1	1	1	2	4
0.1.1.1.10.2	Bacteria;Acidobacteria;Acidobacteria;Subgroup_17;uncultured_Acidobacteria_bacterium	9	1	5	0	1	1	0	0	0	1
0.1.1.1.13.11	Bacteria;Acidobacteria;Acidobacteria;Subgroup_2;uncultured_bacterium	9	2	6	1	0	0	0	0	0	0
0.1.1.2.9.3	Bacteria;Acidobacteria;Holophagae;Subgroup_7;unclassified	9	1	7	0	0	0	0	0	0	1
0.1.2.11.2.3	Bacteria;Actinobacteria;Thermoleophilia;Solirubrobacterales;480-2	9	3	4	0	0	0	1	1	0	0
0.1.7.5.2.1	Bacteria;Bacteroidetes;Cytophagia;Order_II;Rhodothermaceae	9	0	3	1	0	0	5	0	0	0
0.1.26.4.3.5	Bacteria;Cyanobacteria;Melainabacteria;Obscuribacterales;uncultured_actinobacterium	9	2	3	0	0	1	1	2	0	0
0.1.26.4.4.2	Bacteria;Cyanobacteria;Melainabacteria;Vampirovibrionales;marine_metagenome	9	0	0	0	0	0	1	5	1	2
0.1.45.4.13.8	Bacteria;Proteobacteria;Alphaproteobacteria;Rhizobiales;Beijerinckiaceae	9	4	5	0	0	0	0	0	0	0
0.1.45.4.15.5	Bacteria;Proteobacteria;Alphaproteobacteria;Rhodospirillales;CCU22	9	6	3	0	0	0	0	0	0	0
0.1.45.4.16.22	Bacteria;Proteobacteria;Alphaproteobacteria;Rickettsiales;uncultured_bacterium	9	0	0	0	5	3	0	0	0	1
0.1.45.11.3.3	Bacteria;Proteobacteria;Gammaproteobacteria;34P16;unclassified	9	5	4	0	0	0	0	0	0	0
0.1.58.4.5.1	Bacteria;Verrucomicrobia;S-BQ2-57_soil_group;uncultured_bacterium;unclassified	9	2	2	0	1	3	0	0	1	0
0.1.1.1.18.6	Bacteria;Acidobacteria;Acidobacteria;Subgroup_4;unclassified	8	3	3	0	1	0	0	0	0	1
0.1.2.2.13.8	Bacteria;Actinobacteria;Actinobacteria;PeM15;uncultured_actinobacterium	8	3	2	0	1	0	0	0	1	1
0.1.7.4.1.16	Bacteria;Bacteroidetes;Bacteroidia;Bacteroidales;PL-11B8_wastewater-sludge_group	8	2	2	0	2	0	0	0	1	1
0.1.10.16.1.1	Bacteria;Candidate_division_BRC1;uncultured_gamma_proteobacterium;unclassified;unclassified	8	1	2	0	1	4	0	0	0	0
0.1.13.28.1.1	Bacteria;Candidate_division_OD1;uncultured_soil_bacterium;unclassified;unclassified	8	4	0	0	1	0	0	0	2	1
0.1.15.2.1.1	Bacteria;Candidate_division_OP3;mixed_culture_isolate_koll11;unclassified;unclassified	8	5	1	0	0	1	0	1	0	0
0.1.32.2.2.27	Bacteria;Firmicutes;Clostridia;Clostridiales;Peptostreptococcaceae	8	3	2	0	0	1	0	0	0	2
0.1.41.12.1.1	Bacteria;NPL-UPA2;uncultured_organism;unclassified;unclassified	8	0	1	0	3	0	2	1	0	1
0.1.44.14.12.1	Bacteria;Planctomycetes;vadinHA49;uncultured_planctomycete;unclassified	8	1	5	0	1	0	0	0	0	1
0.1.45.4.6.4	Bacteria;Proteobacteria;Alphaproteobacteria;DB1-14;marine_metagenome	8	0	0	0	0	0	2	2	1	3
0.1.45.4.13.35	Bacteria;Proteobacteria;Alphaproteobacteria;Rhizobiales;alphaI_cluster	8	1	3	0	0	1	0	0	0	3
0.1.45.4.15.6	Bacteria;Proteobacteria;Alphaproteobacteria;Rhodospirillales;DA111	8	2	3	0	0	0	1	0	0	2
0.1.45.4.21.10	Bacteria;Proteobacteria;Alphaproteobacteria;Sphingomonadales;M05-Pitesti	8	3	2	0	1	1	0	1	0	0
0.1.45.7.8.1	Bacteria;Proteobacteria;Deltaproteobacteria;Desulfobacterales;Desulfobacteraceae	8	2	1	0	0	2	0	0	3	0
0.1.45.7.14.15	Bacteria;Proteobacteria;Deltaproteobacteria;Myxococcales;VHS-B3-70	8	3	4	0	0	1	0	0	0	0
0.1.45.11.51.10	Bacteria;Proteobacteria;Gammaproteobacteria;Thiotrichales;unclassified	8	2	3	0	0	3	0	0	0	0
0.1.45.20.4.1	Bacteria;Proteobacteria;TA18;uncultured_Bradyrhizobiaceae_bacterium;unclassified	8	8	0	0	0	0	0	0	0	0
0.1.51.1.18.1	Bacteria;Spirochaetae;Spirochaetes;unclassified;unclassified	8	0	0	0	1	0	2	5	0	0
0.1.55.1.6.3	Bacteria;Tenericutes;Mollicutes;Entomoplasmatales;Spiroplasmataceae	8	5	2	0	0	1	0	0	0	0
0.1.58.2.34.1	Bacteria;Verrucomicrobia;OPB35_soil_group;uncultured_soil_bacterium;unclassified	8	0	7	0	0	1	0	0	0	0
0.1.58.8.1.6	Bacteria;Verrucomicrobia;Verrucomicrobiae;Verrucomicrobiales;unclassified	8	0	5	0	1	0	0	0	0	2
0.1.1.1.2.1	Bacteria;Acidobacteria;Acidobacteria;AT-s3-28;unclassified	7	0	6	0	0	1	0	0	0	0
0.1.1.1.2.6	Bacteria;Acidobacteria;Acidobacteria;AT-s3-28;uncultured_bacterium	7	2	3	0	1	0	0	0	0	1
0.1.1.1.6.1	Bacteria;Acidobacteria;Acidobacteria;Subgroup_11;unclassified	7	2	2	0	1	2	0	0	0	0
0.1.1.1.17.4	Bacteria;Acidobacteria;Acidobacteria;Subgroup_3;Elev-16S-1166	7	2	0	1	0	3	0	0	1	0
0.1.1.1.20.51	Bacteria;Acidobacteria;Acidobacteria;Subgroup_6;uncultured_bacterium_gp6	7	3	0	0	0	1	0	0	0	3
0.1.2.2.8.2	Bacteria;Actinobacteria;Actinobacteria;Frankiales;Cryptosporangiaceae	7	2	1	0	0	0	1	0	1	2
0.1.2.2.8.7	Bacteria;Actinobacteria;Actinobacteria;Frankiales;unclassified	7	3	3	0	0	0	0	0	1	0
0.1.15.1.1.1	Bacteria;Candidate_division_OP3;Omnitrophica_clone_OPB2;unclassified;unclassified	7	0	0	0	0	0	0	7	0	0
0.1.20.7.1.1	Bacteria;Candidate_division_WS3;uncultured_Acidobacteria_bacterium;unclassified;unclassified	7	3	1	0	1	1	0	0	0	1
0.1.20.10.1.1	Bacteria;Candidate_division_WS3;uncultured_Fibrobacteres_bacterium;unclassified;unclassified	7	3	3	0	1	0	0	0	0	0
0.1.24.2.3.1	Bacteria;Chloroflexi;Ardenticatenia;uncultured;unclassified	7	6	1	0	0	0	0	0	0	0
0.1.24.9.5.1	Bacteria;Chloroflexi;JG30-KF-CM66;uncultured_Chloroflexi_bacterium;unclassified	7	0	1	0	4	0	0	1	1	0
0.1.32.1.5.6	Bacteria;Firmicutes;Bacilli;Lactobacillales;Leuconostocaceae	7	1	1	0	2	1	0	0	1	1
0.1.40.15.3.1	Bacteria;Lentisphaerae;MSBL3;uncultured_bacterium;unclassified	7	1	0	0	2	3	1	0	0	0
0.1.44.7.18.1	Bacteria;Planctomycetes;Phycisphaerae;mle1-8;unclassified	7	0	0	0	2	0	0	0	2	3
0.1.45.4.5.3	Bacteria;Proteobacteria;Alphaproteobacteria;Caulobacterales;unclassified	7	1	0	0	0	2	0	3	0	1
0.1.45.4.13.20	Bacteria;Proteobacteria;Alphaproteobacteria;Rhizobiales;JG34-KF-361	7	4	2	0	0	0	0	0	0	1
0.1.58.2.37.1	Bacteria;Verrucomicrobia;OPB35_soil_group;uncultured_verrucomicrobium_DEV020;unclassified	7	3	3	0	0	1	0	0	0	0
0.1.58.3.13.2	Bacteria;Verrucomicrobia;Opitutae;vadinHA64;unclassified	7	1	2	0	1	2	0	0	1	0
0.1.59.6.1.1	Bacteria;WCHB1-60;uncultured_Spirochaetes_bacterium;unclassified;unclassified	7	0	0	1	2	2	1	1	0	0
0.1.1.1.6.2	Bacteria;Acidobacteria;Acidobacteria;Subgroup_11;uncultured_Acidobacteria_bacterium	6	3	3	0	0	0	0	0	0	0
0.1.1.1.13.5	Bacteria;Acidobacteria;Acidobacteria;Subgroup_2;unclassified	6	1	4	0	0	0	0	1	0	0
0.1.1.2.1.1	Bacteria;Acidobacteria;Holophagae;Acanthopleuribacterales;Acanthopleuribacteraceae	6	3	3	0	0	0	0	0	0	0
0.1.2.1.1.2	Bacteria;Actinobacteria;Acidimicrobiia;Acidimicrobiales;Acidimicrobiales_Incertae_Sedis	6	0	0	0	0	2	1	0	2	1
0.1.2.2.6.4	Bacteria;Actinobacteria;Actinobacteria;Corynebacteriales;Mycobacteriaceae	6	4	1	0	0	0	1	0	0	0
0.1.2.11.1.2	Bacteria;Actinobacteria;Thermoleophilia;Gaiellales;unclassified	6	1	4	0	0	0	0	0	1	0
0.1.14.14.1.1	Bacteria;Candidate_division_OP11;uncultured_anaerobic_bacterium;unclassified;unclassified	6	0	0	0	0	3	0	0	1	2
0.1.15.8.1.1	Bacteria;Candidate_division_OP3;uncultured_Omnitrophica_bacterium;unclassified;unclassified	6	2	4	0	0	0	0	0	0	0
0.1.24.9.1.1	Bacteria;Chloroflexi;JG30-KF-CM66;unclassified;unclassified	6	0	0	0	0	1	0	0	2	3
0.1.24.16.4.1	Bacteria;Chloroflexi;S085;uncultured_bacterium;unclassified	6	2	1	0	1	0	0	0	0	2
0.1.24.20.6.1	Bacteria;Chloroflexi;TK10;uncultured_Chloroflexus_sp.;unclassified	6	3	2	0	0	0	0	0	1	0
0.1.24.23.25.1	Bacteria;Chloroflexi;uncultured;uncultured_sludge_bacterium_A31;unclassified	6	2	4	0	0	0	0	0	0	0
0.1.8.2.1.1	Bacteria;CKC4;uncultured_Firmicutes_bacterium;unclassified;unclassified	6	0	0	0	3	1	0	0	2	0
0.1.26.3.10.1	Bacteria;Cyanobacteria;ML635J-21;uncultured_cyanobacterium;unclassified	6	1	3	0	0	1	0	0	1	0
0.1.31.1.1.14	Bacteria;Fibrobacteres;Fibrobacteria;Fibrobacterales;unclassified	6	0	1	3	0	2	0	0	0	0
0.1.36.1.2.22	Bacteria;Gemmatimonadetes;Gemmatimonadetes;BD2-11_terrestrial_group;uncultured_soil_bacterium	6	0	4	0	1	1	0	0	0	0
0.1.44.9.3.1	Bacteria;Planctomycetes;Pla4_lineage;uncultured_Planctomycetales_bacterium;unclassified	6	3	3	0	0	0	0	0	0	0
0.1.45.6.15.20	Bacteria;Proteobacteria;Betaproteobacteria;SC-I-84;uncultured_bacterium	6	4	2	0	0	0	0	0	0	0
0.1.45.6.16.20	Bacteria;Proteobacteria;Betaproteobacteria;TRA3-20;uncultured_gamma_proteobacterium	6	1	0	0	2	2	0	0	0	1
0.1.45.11.5.5	Bacteria;Proteobacteria;Gammaproteobacteria;Aeromonadales;unclassified	6	0	0	0	0	0	0	0	4	2
0.1.45.11.33.5	Bacteria;Proteobacteria;Gammaproteobacteria;Methylococcales;IheB2-23	6	3	2	0	0	0	1	0	0	0
0.1.45.20.22.1	Bacteria;Proteobacteria;TA18;uncultured_soil_bacterium;unclassified	6	0	0	0	3	3	0	0	0	0
0.1.58.3.13.5	Bacteria;Verrucomicrobia;Opitutae;vadinHA64;uncultured_Verrucomicrobia_bacterium	6	0	0	0	1	4	0	0	1	0
0.1.1.1.17.6	Bacteria;Acidobacteria;Acidobacteria;Subgroup_3;PAUC26f	5	4	1	0	0	0	0	0	0	0
0.1.1.1.23.1	Bacteria;Acidobacteria;Acidobacteria;unclassified;unclassified	5	3	1	0	1	0	0	0	0	0
0.1.2.1.1.3	Bacteria;Actinobacteria;Acidimicrobiia;Acidimicrobiales;Iamiaceae	5	2	3	0	0	0	0	0	0	0
0.1.2.2.6.5	Bacteria;Actinobacteria;Actinobacteria;Corynebacteriales;Nocardiaceae	5	2	3	0	0	0	0	0	0	0
0.1.2.9.1.1	Bacteria;Actinobacteria;Rubrobacteria;Rubrobacterales;Rubrobacteriaceae	5	2	3	0	0	0	0	0	0	0
0.1.7.9.19.1	Bacteria;Bacteroidetes;SB-1;uncultured_soil_bacterium;unclassified	5	0	0	0	1	3	0	0	1	0
0.1.7.13.1.16	Bacteria;Bacteroidetes;Sphingobacteriia;Sphingobacteriales;ST-12K33	5	0	0	0	0	0	0	0	4	1
0.1.20.13.1.1	Bacteria;Candidate_division_WS3;uncultured_Pelobacter_sp.;unclassified;unclassified	5	2	1	0	0	1	0	0	1	0
0.1.24.21.2.7	Bacteria;Chloroflexi;Thermomicrobia;JG30-KF-CM45;uncultured_bacterium	5	2	2	0	0	0	0	0	0	1
0.1.30.1.1.3	Bacteria;Elusimicrobia;Elusimicrobia;12-31;uncultured_bacterium	5	0	0	0	0	0	0	5	0	0
0.1.30.1.7.8	Bacteria;Elusimicrobia;Elusimicrobia;Lineage_IV;uncultured_microorganism	5	0	0	0	3	2	0	0	0	0
0.1.36.1.1.1	Bacteria;Gemmatimonadetes;Gemmatimonadetes;AT425-EubC11_terrestrial_group;unclassified	5	1	3	1	0	0	0	0	0	0
0.1.40.17.3.1	Bacteria;Lentisphaerae;PBS-III-20;uncultured_bacterium;unclassified	5	3	2	0	0	0	0	0	0	0
0.1.40.17.7.1	Bacteria;Lentisphaerae;PBS-III-20;uncultured_verrucomicrobium_DEV045;unclassified	5	1	4	0	0	0	0	0	0	0
0.1.41.14.1.1	Bacteria;NPL-UPA2;uncultured_prokaryote;unclassified;unclassified	5	2	0	0	0	3	0	0	0	0
0.1.44.1.1.1	Bacteria;Planctomycetes;028H05-P-BN-P5;unclassified;unclassified	5	2	3	0	0	0	0	0	0	0
0.1.44.2.2.1	Bacteria;Planctomycetes;BD7-11;uncultured_Planctomycetaceae_bacterium;unclassified	5	3	2	0	0	0	0	0	0	0
0.1.44.9.7.1	Bacteria;Planctomycetes;Pla4_lineage;uncultured_planctomycete;unclassified	5	2	2	0	0	1	0	0	0	0
0.1.44.9.8.1	Bacteria;Planctomycetes;Pla4_lineage;uncultured_prokaryote;unclassified	5	3	2	0	0	0	0	0	0	0
0.1.45.4.15.12	Bacteria;Proteobacteria;Alphaproteobacteria;Rhodospirillales;MND8	5	4	1	0	0	0	0	0	0	0
0.1.45.6.3.6	Bacteria;Proteobacteria;Betaproteobacteria;B1-7BS;uncultured_soil_bacterium	5	1	2	0	1	0	0	0	0	1
0.1.45.6.16.14	Bacteria;Proteobacteria;Betaproteobacteria;TRA3-20;uncultured_Rhodocyclaceae_bacterium	5	2	1	0	0	2	0	0	0	0
0.1.45.8.6.1	Bacteria;Proteobacteria;Elev-16S-509;uncultured_proteobacterium;unclassified	5	1	0	0	1	1	0	0	2	0
0.1.58.2.40.1	Bacteria;Verrucomicrobia;OPB35_soil_group;uncultured_verrucomicrobium_DEV114;unclassified	5	3	2	0	0	0	0	0	0	0
0.1.1.1.10.4	Bacteria;Acidobacteria;Acidobacteria;Subgroup_17;uncultured_Acidobacteriales_bacterium	4	2	2	0	0	0	0	0	0	0
0.1.1.1.16.3	Bacteria;Acidobacteria;Acidobacteria;Subgroup_25;uncultured_bacterium	4	3	1	0	0	0	0	0	0	0
0.1.2.2.11.8	Bacteria;Actinobacteria;Actinobacteria;Micrococcales;Demequinaceae	4	1	3	0	0	0	0	0	0	0
0.1.2.2.11.23	Bacteria;Actinobacteria;Actinobacteria;Micrococcales;unclassified	4	0	1	0	1	0	0	1	0	1
0.1.2.11.2.1	Bacteria;Actinobacteria;Thermoleophilia;Solirubrobacterales;0319-6M6	4	1	3	0	0	0	0	0	0	0
0.1.2.11.2.14	Bacteria;Actinobacteria;Thermoleophilia;Solirubrobacterales;YNPFFP1	4	4	0	0	0	0	0	0	0	0
0.1.7.4.1.24	Bacteria;Bacteroidetes;Bacteroidia;Bacteroidales;S24-7	4	2	0	0	0	1	0	0	1	0
0.1.7.2.2.1	Bacteria;Bacteroidetes;BSV13;unclassified;unclassified	4	0	1	0	2	0	0	0	1	0
0.1.7.17.23.1	Bacteria;Bacteroidetes;vadinHA17;uncultured_soil_bacterium;unclassified	4	1	0	0	1	1	0	0	1	0
0.1.12.6.1.1	Bacteria;Candidate_division_KB1;unclassified;unclassified;unclassified	4	0	0	0	0	0	1	3	0	0
0.1.24.5.2.1	Bacteria;Chloroflexi;Chloroflexia;Chloroflexales;Chloroflexaceae	4	0	4	0	0	0	0	0	0	0
0.1.24.8.7.1	Bacteria;Chloroflexi;Gitt-GS-136;uncultured_bacterium;unclassified	4	0	2	0	1	1	0	0	0	0
0.1.24.11.2.1	Bacteria;Chloroflexi;KD4-96;unclassified;unclassified	4	1	1	0	0	1	0	1	0	0
0.1.26.4.3.1	Bacteria;Cyanobacteria;Melainabacteria;Obscuribacterales;bioreactor_metagenome	4	2	0	0	1	1	0	0	0	0
0.1.27.1.1.1	Bacteria;Deferribacteres;Deferribacteres;Deferribacterales;Deferribacteraceae	4	0	3	0	1	0	0	0	0	0
0.1.30.1.6.4	Bacteria;Elusimicrobia;Elusimicrobia;Lineage_IIc;uncultured_prokaryote	4	4	0	0	0	0	0	0	0	0
0.1.30.1.7.9	Bacteria;Elusimicrobia;Elusimicrobia;Lineage_IV;uncultured_soil_bacterium	4	1	3	0	0	0	0	0	0	0
0.1.31.1.1.12	Bacteria;Fibrobacteres;Fibrobacteria;Fibrobacterales;possible_family_01	4	0	0	0	1	2	0	1	0	0
0.1.36.1.7.1	Bacteria;Gemmatimonadetes;Gemmatimonadetes;unclassified;unclassified	4	4	0	0	0	0	0	0	0	0
0.1.42.1.1.10	Bacteria;Nitrospirae;Nitrospira;Nitrospirales;unclassified	4	2	2	0	0	0	0	0	0	0
0.1.44.2.7.1	Bacteria;Planctomycetes;BD7-11;uncultured_marine_bacterium;unclassified	4	1	3	0	0	0	0	0	0	0
0.1.44.2.9.1	Bacteria;Planctomycetes;BD7-11;uncultured_planctomycete;unclassified	4	0	0	0	1	2	0	0	0	1
0.1.44.6.12.1	Bacteria;Planctomycetes;OM190;uncultured_planctomycete;unclassified	4	0	2	0	0	2	0	0	0	0
0.1.44.7.6.1	Bacteria;Planctomycetes;Phycisphaerae;CPla-3_termite_group;unclassified	4	0	1	0	1	2	0	0	0	0
0.1.44.7.12.8	Bacteria;Planctomycetes;Phycisphaerae;Phycisphaerales;unclassified	4	0	0	0	0	1	0	3	0	0
0.1.44.11.4.1	Bacteria;Planctomycetes;SGST604;uncultured_planctomycete;unclassified	4	1	1	0	0	2	0	0	0	0
0.1.44.14.6.1	Bacteria;Planctomycetes;vadinHA49;uncultured_Planctomycetaceae_bacterium;unclassified	4	2	2	0	0	0	0	0	0	0
0.1.45.6.16.11	Bacteria;Proteobacteria;Betaproteobacteria;TRA3-20;uncultured_Nitrosomonadaceae_bacterium	4	3	0	0	0	1	0	0	0	0
0.1.45.7.15.2	Bacteria;Proteobacteria;Deltaproteobacteria;Rs-K70_termite_group;uncultured_bacterium	4	0	2	0	0	2	0	0	0	0
0.1.45.11.3.2	Bacteria;Proteobacteria;Gammaproteobacteria;34P16;gamma_proteobacterium_HdN1	4	1	2	0	1	0	0	0	0	0
0.1.45.11.3.1	Bacteria;Proteobacteria;Gammaproteobacteria;34P16;Pseudomonas_sp._MIC_2010	4	0	2	0	1	1	0	0	0	0
0.1.45.11.18.5	Bacteria;Proteobacteria;Gammaproteobacteria;Chromatiales;unclassified	4	1	0	0	0	0	0	0	1	2
0.1.58.2.36.1	Bacteria;Verrucomicrobia;OPB35_soil_group;uncultured_verrucomicrobium_DEV008;unclassified	4	0	1	0	2	0	0	0	0	1
0.1.58.2.39.1	Bacteria;Verrucomicrobia;OPB35_soil_group;uncultured_verrucomicrobium_DEV064;unclassified	4	1	3	0	0	0	0	0	0	0
0.1.59.11.1.1	Bacteria;WCHB1-60;uncultured_soil_bacterium;unclassified;unclassified	4	0	0	0	0	0	0	0	0	4
0.1.1.1.7.3	Bacteria;Acidobacteria;Acidobacteria;Subgroup_12;uncultured_bacterium	3	0	3	0	0	0	0	0	0	0
0.1.1.1.8.1	Bacteria;Acidobacteria;Acidobacteria;Subgroup_13;unclassified	3	0	3	0	0	0	0	0	0	0
0.1.1.1.9.1	Bacteria;Acidobacteria;Acidobacteria;Subgroup_15;unclassified	3	0	2	0	0	0	0	0	0	1
0.1.1.1.10.12	Bacteria;Acidobacteria;Acidobacteria;Subgroup_17;uncultured_soil_bacterium	3	0	0	0	2	0	0	1	0	0
0.1.1.2.9.7	Bacteria;Acidobacteria;Holophagae;Subgroup_7;uncultured_Acidobacterium_sp.	3	2	0	0	1	0	0	0	0	0
0.1.2.2.8.5	Bacteria;Actinobacteria;Actinobacteria;Frankiales;Nakamurellaceae	3	2	1	0	0	0	0	0	0	0
0.1.2.6.2.1	Bacteria;Actinobacteria;MB-A2-108;uncultured_Actinomycetales_bacterium;unclassified	3	2	1	0	0	0	0	0	0	0
0.1.2.11.2.13	Bacteria;Actinobacteria;Thermoleophilia;Solirubrobacterales;TM146	3	0	0	0	0	0	0	0	1	2
0.1.4.22.1.1	Bacteria;Armatimonadetes;uncultured_bacterium_GC55;unclassified;unclassified	3	0	0	0	0	0	1	1	0	1
0.1.4.10.1.1	Bacteria;Armatimonadetes;uncultured_Carnobacterium_sp.;unclassified;unclassified	3	0	3	0	0	0	0	0	0	0
0.1.4.16.1.1	Bacteria;Armatimonadetes;uncultured_Tetrasphaera_sp.;unclassified;unclassified	3	0	2	0	1	0	0	0	0	0
0.1.7.3.1.1	Bacteria;Bacteroidetes;Bacteroidetes_Incertae_Sedis;Unknown_Order;Unknown_Family	3	0	2	0	0	0	0	0	0	1
0.1.7.10.2.1	Bacteria;Bacteroidetes;SB-5;unclassified;unclassified	3	0	0	0	0	3	0	0	0	0
0.1.7.15.4.1	Bacteria;Bacteroidetes;WCHB1-32;uncultured_Bacteroidetes_bacterium;unclassified	3	2	1	0	0	0	0	0	0	0
0.1.5.22.1.1	Bacteria;BD1-5;uncultured_candidate_division_GN10_bacterium;unclassified;unclassified	3	1	0	0	0	0	0	0	0	2
0.1.5.17.1.1	Bacteria;BD1-5;uncultured_Microgenomates_bacterium;unclassified;unclassified	3	1	0	0	0	0	0	0	2	0
0.1.14.20.1.1	Bacteria;Candidate_division_OP11;uncultured_eubacterium_WCHB1-56;unclassified;unclassified	3	1	0	0	0	0	0	0	0	2
0.1.23.2.1.4	Bacteria;Chlorobi;Ignavibacteria;Ignavibacteriales;Ignavibacteriaceae	3	0	2	0	0	0	0	0	1	0
0.1.24.2.3.7	Bacteria;Chloroflexi;Ardenticatenia;uncultured;uncultured_bacterium	3	1	2	0	0	0	0	0	0	0
0.1.24.6.1.4	Bacteria;Chloroflexi;Dehalococcoidia;Dehalococcoidales;uncultured	3	0	0	0	1	0	1	0	0	1
0.1.24.16.2.1	Bacteria;Chloroflexi;S085;uncultured_Chloroflexi_bacterium;unclassified	3	1	0	0	1	0	0	0	1	0
0.1.24.21.2.2	Bacteria;Chloroflexi;Thermomicrobia;JG30-KF-CM45;unclassified	3	1	2	0	0	0	0	0	0	0
0.1.24.20.10.1	Bacteria;Chloroflexi;TK10;uncultured_bacterium;unclassified	3	2	0	0	1	0	0	0	0	0
0.1.26.4.2.5	Bacteria;Cyanobacteria;Melainabacteria;Gastranaerophilales;uncultured_Gloeobacter_sp.	3	0	0	0	0	3	0	0	0	0
0.1.27.1.1.2	Bacteria;Deferribacteres;Deferribacteres;Deferribacterales;Deferribacterales_Incertae_Sedis	3	1	2	0	0	0	0	0	0	0
0.1.30.1.3.3	Bacteria;Elusimicrobia;Elusimicrobia;FCPU453;uncultured_bacterium	3	1	2	0	0	0	0	0	0	0
0.1.31.1.1.3	Bacteria;Fibrobacteres;Fibrobacteria;Fibrobacterales;B122	3	0	0	0	1	2	0	0	0	0
0.1.32.2.2.11	Bacteria;Firmicutes;Clostridia;Clostridiales;Family_XI	3	2	0	0	0	1	0	0	0	0
0.1.36.1.6.1	Bacteria;Gemmatimonadetes;Gemmatimonadetes;S0134_terrestrial_group;unclassified	3	0	1	0	0	0	0	1	0	1
0.1.40.23.2.1	Bacteria;Lentisphaerae;WCHB1-41;unclassified;unclassified	3	0	1	0	2	0	0	0	0	0
0.1.42.1.1.4	Bacteria;Nitrospirae;Nitrospira;Nitrospirales;FTL22	3	2	1	0	0	0	0	0	0	0
0.1.42.1.1.9	Bacteria;Nitrospirae;Nitrospira;Nitrospirales;Sh765B-TzT-35	3	0	1	0	0	0	0	2	0	0
0.1.43.2.1.1	Bacteria;OC31;uncultured_bacterium;unclassified;unclassified	3	1	1	0	0	0	0	0	0	1
0.1.44.2.4.1	Bacteria;Planctomycetes;BD7-11;uncultured_Planctomycetia_bacterium;unclassified	3	0	1	0	1	1	0	0	0	0
0.1.44.7.4.1	Bacteria;Planctomycetes;Phycisphaerae;C86;unclassified	3	2	0	0	1	0	0	0	0	0
0.1.44.7.14.1	Bacteria;Planctomycetes;Phycisphaerae;S-70;unclassified	3	0	3	0	0	0	0	0	0	0
0.1.44.8.10.1	Bacteria;Planctomycetes;Pla3_lineage;unidentified_marine_bacterioplankton;unclassified	3	1	2	0	0	0	0	0	0	0
0.1.45.4.15.8	Bacteria;Proteobacteria;Alphaproteobacteria;Rhodospirillales;JG37-AG-20	3	1	2	0	0	0	0	0	0	0
0.1.45.4.21.5	Bacteria;Proteobacteria;Alphaproteobacteria;Sphingomonadales;B48	3	0	0	0	0	0	0	2	1	0
0.1.45.4.21.9	Bacteria;Proteobacteria;Alphaproteobacteria;Sphingomonadales;JG34-KF-161	3	1	1	0	0	0	1	0	0	0
0.1.45.6.5.4	Bacteria;Proteobacteria;Betaproteobacteria;Burkholderiales;CM1G08	3	0	0	0	2	0	0	0	1	0
0.1.45.6.12.3	Bacteria;Proteobacteria;Betaproteobacteria;Nitrosomonadales;unclassified	3	2	0	0	0	0	0	0	0	1
0.1.45.7.4.3	Bacteria;Proteobacteria;Deltaproteobacteria;Bdellovibrionales;unclassified	3	3	0	0	0	0	0	0	0	0
0.1.45.7.13.20	Bacteria;Proteobacteria;Deltaproteobacteria;GR-WP33-30;uncultured_delta_proteobacterium	3	2	1	0	0	0	0	0	0	0
0.1.45.7.13.21	Bacteria;Proteobacteria;Deltaproteobacteria;GR-WP33-30;uncultured_marine_bacterium	3	1	1	0	1	0	0	0	0	0
0.1.45.7.14.9	Bacteria;Proteobacteria;Deltaproteobacteria;Myxococcales;Myxococcaceae	3	0	3	0	0	0	0	0	0	0
0.1.45.7.18.9	Bacteria;Proteobacteria;Deltaproteobacteria;Sh765B-TzT-29;uncultured_Green_Bay_ferromanganous_micronodule_bacterium_MND4	3	0	1	0	2	0	0	0	0	0
0.1.45.7.19.9	Bacteria;Proteobacteria;Deltaproteobacteria;Sva0485;uncultured_delta_proteobacterium	3	0	0	0	0	0	1	2	0	0
0.1.45.11.12.2	Bacteria;Proteobacteria;Gammaproteobacteria;BD72BR169;uncultured_bacterium	3	1	0	0	0	0	0	0	0	2
0.1.45.11.18.4	Bacteria;Proteobacteria;Gammaproteobacteria;Chromatiales;Halothiobacillaceae	3	0	0	0	0	3	0	0	0	0
0.1.45.11.33.7	Bacteria;Proteobacteria;Gammaproteobacteria;Methylococcales;Marine_Methylotrophic_Group_2	3	0	1	0	0	0	1	0	1	0
0.1.45.11.34.10	Bacteria;Proteobacteria;Gammaproteobacteria;NKB5;uncultured_gamma_proteobacterium	3	1	2	0	0	0	0	0	0	0
0.1.45.11.34.6	Bacteria;Proteobacteria;Gammaproteobacteria;NKB5;uncultured_Methylococcaceae_bacterium	3	1	1	0	0	0	0	0	0	1
0.1.45.16.3.1	Bacteria;Proteobacteria;SC3-20;unclassified;unclassified	3	2	1	0	0	0	0	0	0	0
0.1.52.1.1.1	Bacteria;Synergistetes;Synergistia;Synergistales;Synergistaceae	3	0	1	0	0	0	0	0	0	2
0.1.55.1.10.5	Bacteria;Tenericutes;Mollicutes;NB1-n;uncultured_bacterium	3	2	1	0	0	0	0	0	0	0
0.1.54.9.1.1	Bacteria;TM6;uncultured_Verrucomicrobia_bacterium;unclassified;unclassified	3	1	0	0	0	0	0	0	2	0
0.1.59.3.1.1	Bacteria;WCHB1-60;uncultured_Candidatus_Saccharibacteria_sp.;unclassified;unclassified	3	1	2	0	0	0	0	0	0	0
0.1.1.1.9.4	Bacteria;Acidobacteria;Acidobacteria;Subgroup_15;uncultured_bacterium	2	2	0	0	0	0	0	0	0	0
0.1.1.1.12.2	Bacteria;Acidobacteria;Acidobacteria;Subgroup_19;uncultured_bacterium	2	1	1	0	0	0	0	0	0	0
0.1.1.1.16.1	Bacteria;Acidobacteria;Acidobacteria;Subgroup_25;unclassified	2	0	2	0	0	0	0	0	0	0
0.1.1.1.18.2	Bacteria;Acidobacteria;Acidobacteria;Subgroup_4;DS-100	2	1	1	0	0	0	0	0	0	0
0.1.1.1.20.62	Bacteria;Acidobacteria;Acidobacteria;Subgroup_6;uncultured_proteobacterium	2	1	1	0	0	0	0	0	0	0
0.1.1.1.20.66	Bacteria;Acidobacteria;Acidobacteria;Subgroup_6;unidentified	2	0	0	0	0	1	0	0	0	1
0.1.1.2.7.4	Bacteria;Acidobacteria;Holophagae;Subgroup_10;Sva0725	2	1	0	0	0	1	0	0	0	0
0.1.1.3.2.1	Bacteria;Acidobacteria;Subgroup_22;uncultured_Acidobacteria_bacterium;unclassified	2	2	0	0	0	0	0	0	0	0
0.1.2.2.11.21	Bacteria;Actinobacteria;Actinobacteria;Micrococcales;Sanguibacteraceae	2	0	0	0	1	1	0	0	0	0
0.1.2.2.13.13	Bacteria;Actinobacteria;Actinobacteria;PeM15;uncultured_soil_bacterium	2	0	1	0	0	0	0	0	1	0
0.1.2.2.14.3	Bacteria;Actinobacteria;Actinobacteria;Propionibacteriales;unclassified	2	0	2	0	0	0	0	0	0	0
0.1.2.6.12.1	Bacteria;Actinobacteria;MB-A2-108;uncultured_bacterium;unclassified	2	0	2	0	0	0	0	0	0	0
0.1.2.7.1.1	Bacteria;Actinobacteria;Nitriliruptoria;Euzebyales;Euzebyaceae	2	0	2	0	0	0	0	0	0	0
0.1.2.11.2.5	Bacteria;Actinobacteria;Thermoleophilia;Solirubrobacterales;Elev-16S-1332	2	0	0	0	1	0	1	0	0	0
0.1.4.2.1.3	Bacteria;Armatimonadetes;Chthonomonadetes;Chthonomonadales;unclassified	2	1	1	0	0	0	0	0	0	0
0.1.4.17.1.1	Bacteria;Armatimonadetes;uncultured_actinobacterium;unclassified;unclassified	2	1	0	0	0	1	0	0	0	0
0.1.4.19.1.1	Bacteria;Armatimonadetes;uncultured_bacterium;unclassified;unclassified	2	0	1	0	0	0	1	0	0	0
0.1.4.12.1.1	Bacteria;Armatimonadetes;uncultured_Firmicutes_bacterium;unclassified;unclassified	2	2	0	0	0	0	0	0	0	0
0.1.7.2.4.1	Bacteria;Bacteroidetes;BSV13;uncultured_Bacteroidetes_bacterium;unclassified	2	0	1	0	1	0	0	0	0	0
0.1.7.6.1.7	Bacteria;Bacteroidetes;Flavobacteriia;Flavobacteriales;Schleiferiaceae	2	1	1	0	0	0	0	0	0	0
0.1.7.13.1.8	Bacteria;Bacteroidetes;Sphingobacteriia;Sphingobacteriales;KD1-131	2	0	0	0	2	0	0	0	0	0
0.1.7.14.11.1	Bacteria;Bacteroidetes;VC2.1_Bac22;uncultured_bacterium;unclassified	2	0	2	0	0	0	0	0	0	0
0.1.5.25.1.1	Bacteria;BD1-5;uncultured_epsilon_proteobacterium;unclassified;unclassified	2	1	0	0	0	0	0	0	0	1
0.1.13.18.1.1	Bacteria;Candidate_division_OD1;uncultured_alpha_proteobacterium;unclassified;unclassified	2	2	0	0	0	0	0	0	0	0
0.1.13.24.1.1	Bacteria;Candidate_division_OD1;uncultured_epsilon_proteobacterium;unclassified;unclassified	2	1	0	0	0	0	0	0	0	1
0.1.13.27.1.1	Bacteria;Candidate_division_OD1;uncultured_planctomycete;unclassified;unclassified	2	2	0	0	0	0	0	0	0	0
0.1.14.10.1.1	Bacteria;Candidate_division_OP11;uncultured_Anaerolineales_bacterium;unclassified;unclassified	2	1	0	0	0	0	0	0	0	1
0.1.14.28.1.1	Bacteria;Candidate_division_OP11;uncultured_soil_bacterium;unclassified;unclassified	2	0	0	0	0	0	0	0	0	2
0.1.15.4.1.1	Bacteria;Candidate_division_OP3;uncultured_Banisveld_landfill_bacterium_BVC56;unclassified;unclassified	2	1	1	0	0	0	0	0	0	0
0.1.18.8.1.1	Bacteria;Candidate_division_SR1;uncultured_bacterium;unclassified;unclassified	2	0	0	0	0	1	0	0	1	0
0.1.20.17.1.1	Bacteria;Candidate_division_WS3;uncultured_bacterium;unclassified;unclassified	2	1	1	0	0	0	0	0	0	0
0.1.20.28.1.1	Bacteria;Candidate_division_WS3;uncultured_soil_bacterium;unclassified;unclassified	2	1	1	0	0	0	0	0	0	0
0.1.22.1.1.6	Bacteria;Chlamydiae;Chlamydiae;Chlamydiales;Waddliaceae	2	1	0	0	0	0	0	0	0	1
0.1.23.2.1.7	Bacteria;Chlorobi;Ignavibacteria;Ignavibacteriales;LD-RB-34	2	0	0	0	0	0	0	0	2	0
0.1.24.9.3.1	Bacteria;Chloroflexi;JG30-KF-CM66;uncultured_Armatimonadetes_bacterium;unclassified	2	1	0	0	0	1	0	0	0	0
0.1.24.13.3.2	Bacteria;Chloroflexi;Ktedonobacteria;C0119;uncultured_Chloroflexi_bacterium	2	0	1	0	0	0	0	0	1	0
0.1.24.15.3.1	Bacteria;Chloroflexi;P2-11E;uncultured_bacterium;unclassified	2	1	0	0	1	0	0	0	0	0
0.1.24.18.1.1	Bacteria;Chloroflexi;SHA-26;unclassified;unclassified	2	0	0	2	0	0	0	0	0	0
0.1.24.20.12.1	Bacteria;Chloroflexi;TK10;uncultured_gamma_proteobacterium;unclassified	2	2	0	0	0	0	0	0	0	0
0.1.24.24.1.1	Bacteria;Chloroflexi;uncultured_Bellilinea_sp.;unclassified;unclassified	2	0	0	0	0	0	0	0	2	0
0.1.24.23.2.1	Bacteria;Chloroflexi;uncultured;hot_springs_metagenome;unclassified	2	0	2	0	0	0	0	0	0	0
0.1.26.2.9.1	Bacteria;Cyanobacteria;Cyanobacteria;SubsectionV;FamilyI	2	0	0	0	0	1	1	0	0	0
0.1.26.2.16.1	Bacteria;Cyanobacteria;Cyanobacteria;uncultured_bacterium;unclassified	2	1	0	0	0	1	0	0	0	0
0.1.30.1.11.2	Bacteria;Elusimicrobia;Elusimicrobia;Rs-M47;uncultured_bacterium	2	0	1	0	0	1	0	0	0	0
0.1.31.1.5.1	Bacteria;Fibrobacteres;Fibrobacteria;uncultured_bacterium;unclassified	2	1	1	0	0	0	0	0	0	0
0.1.32.1.2.6	Bacteria;Firmicutes;Bacilli;Bacillales;Listeriaceae	2	0	2	0	0	0	0	0	0	0
0.1.32.1.2.15	Bacteria;Firmicutes;Bacilli;Bacillales;uncultured	2	0	0	0	0	0	0	0	2	0
0.1.32.2.3.2	Bacteria;Firmicutes;Clostridia;D8A-2;unclassified	2	0	0	1	0	0	0	1	0	0
0.1.32.4.1.1	Bacteria;Firmicutes;Negativicutes;Selenomonadales;Acidaminococcaceae	2	0	0	0	0	0	0	0	0	2
0.1.32.4.1.4	Bacteria;Firmicutes;Negativicutes;Selenomonadales;uncultured	2	1	0	0	0	1	0	0	0	0
0.1.36.1.2.11	Bacteria;Gemmatimonadetes;Gemmatimonadetes;BD2-11_terrestrial_group;uncultured_bacterium	2	1	1	0	0	0	0	0	0	0
0.1.40.7.4.1	Bacteria;Lentisphaerae;DEV055;uncultured_bacterium;unclassified	2	0	1	0	0	0	0	0	1	0
0.1.40.16.6.1	Bacteria;Lentisphaerae;Oligosphaeria;uncultured_Lentisphaerae_bacterium;unclassified	2	0	0	0	1	1	0	0	0	0
0.1.42.1.1.6	Bacteria;Nitrospirae;Nitrospira;Nitrospirales;MIZ17	2	0	1	0	0	1	0	0	0	0
0.1.44.3.2.1	Bacteria;Planctomycetes;C47;uncultured_bacterium;unclassified	2	0	0	0	1	1	0	0	0	0
0.1.44.7.4.3	Bacteria;Planctomycetes;Phycisphaerae;C86;uncultured_planctomycete	2	1	1	0	0	0	0	0	0	0
0.1.44.7.6.3	Bacteria;Planctomycetes;Phycisphaerae;CPla-3_termite_group;uncultured_planctomycete	2	1	0	0	0	0	1	0	0	0
0.1.44.7.13.2	Bacteria;Planctomycetes;Phycisphaerae;Pla1_lineage;uncultured_bacterium	2	0	2	0	0	0	0	0	0	0
0.1.44.10.1.1	Bacteria;Planctomycetes;Planctomycetacia;Brocadiales;Brocadiaceae	2	0	0	0	0	0	0	2	0	0
0.1.45.4.6.12	Bacteria;Proteobacteria;Alphaproteobacteria;DB1-14;uncultured_marine_bacterium	2	0	0	0	0	0	0	0	1	1
0.1.45.4.6.13	Bacteria;Proteobacteria;Alphaproteobacteria;DB1-14;uncultured_organism	2	0	0	0	0	1	0	0	0	1
0.1.45.4.6.16	Bacteria;Proteobacteria;Alphaproteobacteria;DB1-14;uncultured_sludge_bacterium_S43	2	1	0	0	0	0	0	0	0	1
0.1.45.4.8.7	Bacteria;Proteobacteria;Alphaproteobacteria;E6aD10;uncultured_alpha_proteobacterium	2	1	0	0	0	0	1	0	0	0
0.1.45.4.15.1	Bacteria;Proteobacteria;Alphaproteobacteria;Rhodospirillales;AKYH478	2	0	2	0	0	0	0	0	0	0
0.1.45.6.5.10	Bacteria;Proteobacteria;Betaproteobacteria;Burkholderiales;uncultured_bacterium	2	0	2	0	0	0	0	0	0	0
0.1.45.6.15.27	Bacteria;Proteobacteria;Betaproteobacteria;SC-I-84;uncultured_proteobacterium	2	0	1	0	1	0	0	0	0	0
0.1.45.7.2.2	Bacteria;Proteobacteria;Deltaproteobacteria;43F-1404R;unclassified	2	0	0	0	0	2	0	0	0	0
0.1.45.7.9.2	Bacteria;Proteobacteria;Deltaproteobacteria;Desulfovibrionales;Desulfomicrobiaceae	2	0	0	0	1	0	0	1	0	0
0.1.45.7.11.3	Bacteria;Proteobacteria;Deltaproteobacteria;Desulfuromonadales;AKYG597	2	0	0	0	0	0	0	0	0	2
0.1.45.7.13.2	Bacteria;Proteobacteria;Deltaproteobacteria;GR-WP33-30;bacterium_enrichment_culture_clone_B30	2	1	0	0	0	1	0	0	0	0
0.1.45.7.13.17	Bacteria;Proteobacteria;Deltaproteobacteria;GR-WP33-30;uncultured_bacterium	2	0	2	0	0	0	0	0	0	0
0.1.45.7.13.13	Bacteria;Proteobacteria;Deltaproteobacteria;GR-WP33-30;uncultured_Myxococcales_bacterium	2	1	1	0	0	0	0	0	0	0
0.1.45.7.13.28	Bacteria;Proteobacteria;Deltaproteobacteria;GR-WP33-30;uncultured_soil_bacterium	2	1	1	0	0	0	0	0	0	0
0.1.45.7.13.14	Bacteria;Proteobacteria;Deltaproteobacteria;GR-WP33-30;uncultured_Sorangiineae_bacterium	2	0	2	0	0	0	0	0	0	0
0.1.45.11.1.1	Bacteria;Proteobacteria;Gammaproteobacteria;1013-28-CG33;unclassified	2	1	1	0	0	0	0	0	0	0
0.1.45.11.4.2	Bacteria;Proteobacteria;Gammaproteobacteria;Acidithiobacillales;Acidithiobacillaceae	2	0	0	1	0	0	0	0	0	1
0.1.45.11.20.3	Bacteria;Proteobacteria;Gammaproteobacteria;E01-9C-26_marine_group;unclassified	2	0	0	0	0	2	0	0	0	0
0.1.45.11.29.6	Bacteria;Proteobacteria;Gammaproteobacteria;KI89A_clade;uncultured_gamma_proteobacterium	2	1	1	0	0	0	0	0	0	0
0.1.45.11.30.6	Bacteria;Proteobacteria;Gammaproteobacteria;KM16;uncultured_bacterium	2	0	2	0	0	0	0	0	0	0
0.1.45.11.34.12	Bacteria;Proteobacteria;Gammaproteobacteria;NKB5;uncultured_organism	2	0	0	0	1	0	0	0	1	0
0.1.45.11.51.4	Bacteria;Proteobacteria;Gammaproteobacteria;Thiotrichales;Francisellaceae	2	1	1	0	0	0	0	0	0	0
0.1.45.11.52.1	Bacteria;Proteobacteria;Gammaproteobacteria;Vibrionales;Vibrionaceae	2	0	0	0	0	0	0	1	1	0
0.1.50.6.1.1	Bacteria;SM2F11;uncultured_organism;unclassified;unclassified	2	0	0	0	0	0	0	0	2	0
0.1.51.1.14.3	Bacteria;Spirochaetae;Spirochaetes;Spirochaetales;LH041	2	0	1	0	0	0	0	0	1	0
0.1.55.1.3.2	Bacteria;Tenericutes;Mollicutes;DMI;uncultured_bacterium	2	1	1	0	0	0	0	0	0	0
0.1.55.1.6.5	Bacteria;Tenericutes;Mollicutes;Entomoplasmatales;unclassified	2	2	0	0	0	0	0	0	0	0
0.1.55.1.11.14	Bacteria;Tenericutes;Mollicutes;RF9;uncultured_bacterium	2	0	0	0	1	0	0	0	1	0
0.1.55.1.12.1	Bacteria;Tenericutes;Mollicutes;unclassified;unclassified	2	1	0	0	0	0	0	1	0	0
0.1.54.6.1.1	Bacteria;TM6;uncultured_Acidobacterium_sp.;unclassified;unclassified	2	0	1	0	0	0	0	0	0	1
0.1.58.2.27.1	Bacteria;Verrucomicrobia;OPB35_soil_group;uncultured_archaeon;unclassified	2	1	1	0	0	0	0	0	0	0
0.1.1.1.6.5	Bacteria;Acidobacteria;Acidobacteria;Subgroup_11;uncultured_bacterium	1	0	1	0	0	0	0	0	0	0
0.1.1.1.8.2	Bacteria;Acidobacteria;Acidobacteria;Subgroup_13;uncultured_Acidobacteria_bacterium	1	0	0	0	0	0	0	0	1	0
0.1.1.1.10.8	Bacteria;Acidobacteria;Acidobacteria;Subgroup_17;uncultured_bacterium	1	0	1	0	0	0	0	0	0	0
0.1.1.1.11.4	Bacteria;Acidobacteria;Acidobacteria;Subgroup_18;uncultured_bacterium	1	0	0	0	0	0	0	0	0	1
0.1.1.1.16.2	Bacteria;Acidobacteria;Acidobacteria;Subgroup_25;uncultured_Acidobacteria_bacterium	1	0	1	0	0	0	0	0	0	0
0.1.1.1.16.6	Bacteria;Acidobacteria;Acidobacteria;Subgroup_25;uncultured_soil_bacterium	1	0	1	0	0	0	0	0	0	0
0.1.1.1.17.5	Bacteria;Acidobacteria;Acidobacteria;Subgroup_3;GOUTB8	1	0	0	0	0	0	0	1	0	0
0.1.1.1.19.6	Bacteria;Acidobacteria;Acidobacteria;Subgroup_5;uncultured_Holophaga_sp.	1	1	0	0	0	0	0	0	0	0
0.1.1.1.20.27	Bacteria;Acidobacteria;Acidobacteria;Subgroup_6;uncultured_Holophaga_sp.	1	0	1	0	0	0	0	0	0	0
0.1.1.2.7.3	Bacteria;Acidobacteria;Holophagae;Subgroup_10;NS72	1	0	1	0	0	0	0	0	0	0
0.1.1.2.9.1	Bacteria;Acidobacteria;Holophagae;Subgroup_7;Acidobacteria_bacterium_enrichment_culture_clone_CV-04	1	0	1	0	0	0	0	0	0	0
0.1.1.2.9.4	Bacteria;Acidobacteria;Holophagae;Subgroup_7;uncultured_Acidobacteria_bacterium	1	0	1	0	0	0	0	0	0	0
0.1.1.2.9.12	Bacteria;Acidobacteria;Holophagae;Subgroup_7;uncultured_bacterium	1	0	0	0	0	0	0	0	1	0
0.1.1.2.9.16	Bacteria;Acidobacteria;Holophagae;Subgroup_7;uncultured_proteobacterium	1	0	0	0	0	0	0	0	0	1
0.1.1.3.5.1	Bacteria;Acidobacteria;Subgroup_22;uncultured_Acidobacterium_sp.;unclassified	1	0	1	0	0	0	0	0	0	0
0.1.1.3.10.1	Bacteria;Acidobacteria;Subgroup_22;uncultured_prokaryote;unclassified	1	0	1	0	0	0	0	0	0	0
0.1.1.4.1.1	Bacteria;Acidobacteria;Subgroup_26;unclassified;unclassified	1	0	0	0	0	0	0	0	0	1
0.1.1.5.1.1	Bacteria;Acidobacteria;unclassified;unclassified;unclassified	1	1	0	0	0	0	0	0	0	0
0.1.2.1.1.5	Bacteria;Actinobacteria;Acidimicrobiia;Acidimicrobiales;Sva0996_marine_group	1	1	0	0	0	0	0	0	0	0
0.1.2.1.1.8	Bacteria;Actinobacteria;Acidimicrobiia;Acidimicrobiales;uncultured_actinobacterium	1	1	0	0	0	0	0	0	0	0
0.1.2.2.6.1	Bacteria;Actinobacteria;Actinobacteria;Corynebacteriales;Corynebacteriaceae	1	0	0	0	0	0	0	1	0	0
0.1.2.2.11.18	Bacteria;Actinobacteria;Actinobacteria;Micrococcales;Promicromonosporaceae	1	0	0	0	0	0	0	1	0	0
0.1.2.5.3.1	Bacteria;Actinobacteria;KIST-JJY010;uncultured_bacterium;unclassified	1	0	0	0	0	0	0	0	0	1
0.1.2.6.14.1	Bacteria;Actinobacteria;MB-A2-108;uncultured_bacterium_#0425-2M17;unclassified	1	1	0	0	0	0	0	0	0	0
0.1.2.8.4.1	Bacteria;Actinobacteria;OPB41;uncultured_bacterium;unclassified	1	1	0	0	0	0	0	0	0	0
0.1.4.1.1.9	Bacteria;Armatimonadetes;Armatimonadia;Armatimonadales;uncultured_soil_bacterium	1	0	0	0	0	0	0	1	0	0
0.1.4.26.1.1	Bacteria;Armatimonadetes;uncultured_bacterium_SJA-176;unclassified;unclassified	1	1	0	0	0	0	0	0	0	0
0.1.4.29.1.1	Bacteria;Armatimonadetes;uncultured_endolithic_bacterium;unclassified;unclassified	1	1	0	0	0	0	0	0	0	0
0.1.4.30.1.1	Bacteria;Armatimonadetes;uncultured_microorganism;unclassified;unclassified	1	0	0	0	0	0	0	0	1	0
0.1.4.14.1.1	Bacteria;Armatimonadetes;uncultured_Planctomycetales_bacterium;unclassified;unclassified	1	0	1	0	0	0	0	0	0	0
0.1.7.4.1.3	Bacteria;Bacteroidetes;Bacteroidia;Bacteroidales;BS11_gut_group	1	0	1	0	0	0	0	0	0	0
0.1.7.4.1.9	Bacteria;Bacteroidetes;Bacteroidia;Bacteroidales;FTLpost3	1	0	1	0	0	0	0	0	0	0
0.1.7.4.1.12	Bacteria;Bacteroidetes;Bacteroidia;Bacteroidales;M2PB4-65_termite_group	1	0	0	0	1	0	0	0	0	0
0.1.7.4.1.29	Bacteria;Bacteroidetes;Bacteroidia;Bacteroidales;uncultured	1	0	0	0	1	0	0	0	0	0
0.1.7.2.7.1	Bacteria;Bacteroidetes;BSV13;uncultured_bacterium;unclassified	1	0	0	0	0	1	0	0	0	0
0.1.7.10.6.1	Bacteria;Bacteroidetes;SB-5;uncultured_bacterium;unclassified	1	0	0	0	0	0	0	0	1	0
0.1.7.12.4.1	Bacteria;Bacteroidetes;SM1A07;uncultured_Chlorobi_bacterium;unclassified	1	0	0	0	0	0	0	0	0	1
0.1.7.13.1.7	Bacteria;Bacteroidetes;Sphingobacteriia;Sphingobacteriales;FFCH9454	1	1	0	0	0	0	0	0	0	0
0.1.7.13.1.13	Bacteria;Bacteroidetes;Sphingobacteriia;Sphingobacteriales;S15-21	1	1	0	0	0	0	0	0	0	0
0.1.7.13.1.14	Bacteria;Bacteroidetes;Sphingobacteriia;Sphingobacteriales;S15A-MN91	1	0	0	0	0	1	0	0	0	0
0.1.7.17.13.1	Bacteria;Bacteroidetes;vadinHA17;uncultured_bacterium;unclassified	1	0	0	0	0	1	0	0	0	0
0.1.7.15.9.1	Bacteria;Bacteroidetes;WCHB1-32;uncultured_soil_bacterium;unclassified	1	0	0	0	1	0	0	0	0	0
0.1.5.5.1.1	Bacteria;BD1-5;Gracilibacteria_bacterium_canine_oral_taxon_394;unclassified;unclassified	1	1	0	0	0	0	0	0	0	0
0.1.6.4.1.1	Bacteria;BHI80-139;unclassified;unclassified;unclassified	1	0	1	0	0	0	0	0	0	0
0.1.9.1.1.1	Bacteria;Caldiserica;Caldisericia;Caldisericales;08D2Z23	1	0	1	0	0	0	0	0	0	0
0.1.10.4.1.1	Bacteria;Candidate_division_BRC1;uncultured_Acidobacteria_bacterium;unclassified;unclassified	1	0	1	0	0	0	0	0	0	0
0.1.13.13.1.1	Bacteria;Candidate_division_OD1;uncultured_Crater_Lake_bacterium_CL500-94;unclassified;unclassified	1	1	0	0	0	0	0	0	0	0
0.1.13.14.1.1	Bacteria;Candidate_division_OD1;uncultured_Latescibacteria_bacterium;unclassified;unclassified	1	1	0	0	0	0	0	0	0	0
0.1.13.26.1.1	Bacteria;Candidate_division_OD1;uncultured_organism;unclassified;unclassified	1	1	0	0	0	0	0	0	0	0
0.1.14.16.1.1	Bacteria;Candidate_division_OP11;uncultured_candidate_division_WS6_bacterium;unclassified;unclassified	1	0	0	0	0	0	0	0	0	1
0.1.15.18.1.1	Bacteria;Candidate_division_OP3;uncultured_soil_bacterium;unclassified;unclassified	1	0	0	0	0	0	0	1	0	0
0.1.18.11.1.1	Bacteria;Candidate_division_SR1;uncultured_candidate_division_SR1_bacterium;unclassified;unclassified	1	0	0	0	0	1	0	0	0	0
0.1.20.9.1.1	Bacteria;Candidate_division_WS3;uncultured_Bacteroidetes_bacterium;unclassified;unclassified	1	0	1	0	0	0	0	0	0	0
0.1.20.30.1.1	Bacteria;Candidate_division_WS3;uncultured_soil_bacterium_PBS-III-30;unclassified;unclassified	1	0	1	0	0	0	0	0	0	0
0.1.23.2.1.8	Bacteria;Chlorobi;Ignavibacteria;Ignavibacteriales;PHOS-HE36	1	1	0	0	0	0	0	0	0	0
0.1.24.2.3.8	Bacteria;Chloroflexi;Ardenticatenia;uncultured;uncultured_organism	1	0	1	0	0	0	0	0	0	0
0.1.24.2.3.9	Bacteria;Chloroflexi;Ardenticatenia;uncultured;uncultured_prokaryote	1	1	0	0	0	0	0	0	0	0
0.1.24.5.1.2	Bacteria;Chloroflexi;Chloroflexia;AKIW781;unclassified	1	1	0	0	0	0	0	0	0	0
0.1.24.6.2.3	Bacteria;Chloroflexi;Dehalococcoidia;FS117-23B-02;uncultured_bacterium	1	0	0	0	0	0	0	0	1	0
0.1.24.6.6.4	Bacteria;Chloroflexi;Dehalococcoidia;MSBL5;uncultured_bacterium	1	0	0	0	0	0	0	1	0	0
0.1.24.6.12.6	Bacteria;Chloroflexi;Dehalococcoidia;vadinBA26;uncultured_Dehalococcoides_sp.	1	0	1	0	0	0	0	0	0	0
0.1.24.11.8.1	Bacteria;Chloroflexi;KD4-96;uncultured_bacterium;unclassified	1	0	0	0	0	0	1	0	0	0
0.1.24.13.3.3	Bacteria;Chloroflexi;Ktedonobacteria;C0119;uncultured_bacterium	1	0	0	0	1	0	0	0	0	0
0.1.24.13.7.2	Bacteria;Chloroflexi;Ktedonobacteria;MVP-21;uncultured_bacterium	1	0	1	0	0	0	0	0	0	0
0.1.24.16.6.1	Bacteria;Chloroflexi;S085;uncultured_soil_bacterium;unclassified	1	0	1	0	0	0	0	0	0	0
0.1.24.17.12.1	Bacteria;Chloroflexi;SAR202_clade;uncultured_Crater_Lake_bacterium_CL500-9;unclassified	1	1	0	0	0	0	0	0	0	0
0.1.24.17.17.1	Bacteria;Chloroflexi;SAR202_clade;uncultured_deep-sea_bacterium;unclassified	1	1	0	0	0	0	0	0	0	0
0.1.24.18.7.1	Bacteria;Chloroflexi;SHA-26;uncultured_bacterium;unclassified	1	0	0	1	0	0	0	0	0	0
0.1.24.18.4.1	Bacteria;Chloroflexi;SHA-26;uncultured_Chloroflexus_sp.;unclassified	1	0	1	0	0	0	0	0	0	0
0.1.24.21.2.9	Bacteria;Chloroflexi;Thermomicrobia;JG30-KF-CM45;uncultured_soil_bacterium	1	1	0	0	0	0	0	0	0	0
0.1.24.20.7.1	Bacteria;Chloroflexi;TK10;uncultured_Dehalococcoidetes_bacterium;unclassified	1	1	0	0	0	0	0	0	0	0
0.1.24.20.8.1	Bacteria;Chloroflexi;TK10;uncultured_Dehalogenimonas_sp.;unclassified	1	0	0	0	0	0	0	0	0	1
0.1.24.20.13.1	Bacteria;Chloroflexi;TK10;uncultured_soil_bacterium;unclassified	1	1	0	0	0	0	0	0	0	0
0.1.24.23.19.1	Bacteria;Chloroflexi;uncultured;uncultured_bacterium_UASB_TL14;unclassified	1	1	0	0	0	0	0	0	0	0
0.1.24.23.6.1	Bacteria;Chloroflexi;uncultured;uncultured_Chloroflexi_bacterium;unclassified	1	1	0	0	0	0	0	0	0	0
0.1.24.23.26.1	Bacteria;Chloroflexi;uncultured;uncultured_soil_bacterium;unclassified	1	0	0	0	0	0	0	0	1	0
0.1.26.2.15.15	Bacteria;Cyanobacteria;Cyanobacteria;uncultured;unclassified	1	1	0	0	0	0	0	0	0	0
0.1.26.2.15.19	Bacteria;Cyanobacteria;Cyanobacteria;uncultured;uncultured_bacterium	1	0	0	1	0	0	0	0	0	0
0.1.26.4.2.6	Bacteria;Cyanobacteria;Melainabacteria;Gastranaerophilales;uncultured_Merismopedia_sp.	1	0	0	0	1	0	0	0	0	0
0.1.26.4.2.9	Bacteria;Cyanobacteria;Melainabacteria;Gastranaerophilales;uncultured_organism	1	1	0	0	0	0	0	0	0	0
0.1.26.4.4.7	Bacteria;Cyanobacteria;Melainabacteria;Vampirovibrionales;uncultured_soil_bacterium	1	0	0	0	0	0	0	0	0	1
0.1.26.3.16.1	Bacteria;Cyanobacteria;ML635J-21;uncultured_soil_bacterium;unclassified	1	0	1	0	0	0	0	0	0	0
0.1.27.1.1.6	Bacteria;Deferribacteres;Deferribacteres;Deferribacterales;unclassified	1	0	1	0	0	0	0	0	0	0
0.1.28.1.3.1	Bacteria;Deinococcus-Thermus;Deinococci;Thermales;Thermaceae	1	0	1	0	0	0	0	0	0	0
0.1.30.1.3.1	Bacteria;Elusimicrobia;Elusimicrobia;FCPU453;unclassified	1	0	0	0	0	1	0	0	0	0
0.1.30.1.3.2	Bacteria;Elusimicrobia;Elusimicrobia;FCPU453;uncultured_Termite_group_1_bacterium	1	0	1	0	0	0	0	0	0	0
0.1.30.1.8.7	Bacteria;Elusimicrobia;Elusimicrobia;Lineage_I_(Endomicrobia);uncultured_bacterium	1	0	0	0	0	1	0	0	0	0
0.1.30.1.10.4	Bacteria;Elusimicrobia;Elusimicrobia;MVP-88;uncultured_deep-sea_bacterium	1	1	0	0	0	0	0	0	0	0
0.1.31.1.1.4	Bacteria;Fibrobacteres;Fibrobacteria;Fibrobacterales;B18	1	0	0	0	1	0	0	0	0	0
0.1.31.1.3.3	Bacteria;Fibrobacteres;Fibrobacteria;possible_order_07;uncultured_bacterium	1	0	0	0	1	0	0	0	0	0
0.1.32.1.2.8	Bacteria;Firmicutes;Bacilli;Bacillales;Pasteuriaceae	1	0	0	0	0	0	0	0	0	1
0.1.32.1.5.2	Bacteria;Firmicutes;Bacilli;Lactobacillales;Aerococcaceae	1	0	0	0	0	0	0	0	0	1
0.1.32.2.2.7	Bacteria;Firmicutes;Clostridia;Clostridiales;Clostridiales_Incertae_Sedis	1	1	0	0	0	0	0	0	0	0
0.1.32.2.2.17	Bacteria;Firmicutes;Clostridia;Clostridiales;Family_XVIII	1	0	0	0	1	0	0	0	0	0
0.1.32.2.3.9	Bacteria;Firmicutes;Clostridia;D8A-2;uncultured_bacterium	1	0	0	1	0	0	0	0	0	0
0.1.32.2.7.5	Bacteria;Firmicutes;Clostridia;Thermoanaerobacterales;Thermoanaerobacteraceae	1	0	0	0	0	0	0	1	0	0
0.1.33.1.1.7	Bacteria;Fusobacteria;Fusobacteriia;Fusobacteriales;unclassified	1	0	0	0	1	0	0	0	0	0
0.1.36.1.1.2	Bacteria;Gemmatimonadetes;Gemmatimonadetes;AT425-EubC11_terrestrial_group;uncultured_Gemmatimonadetes_bacterium	1	0	0	0	0	0	0	1	0	0
0.1.36.1.1.8	Bacteria;Gemmatimonadetes;Gemmatimonadetes;AT425-EubC11_terrestrial_group;uncultured_soil_bacterium	1	0	1	0	0	0	0	0	0	0
0.1.36.1.2.6	Bacteria;Gemmatimonadetes;Gemmatimonadetes;BD2-11_terrestrial_group;uncultured_Gemmatimonadales_bacterium	1	0	0	0	0	1	0	0	0	0
0.1.36.1.4.4	Bacteria;Gemmatimonadetes;Gemmatimonadetes;Kazan-1B-37;uncultured_proteobacterium	1	0	0	0	0	1	0	0	0	0
0.1.35.5.1.1	Bacteria;GOUTA4;uncultured_bacterium;unclassified;unclassified	1	0	1	0	0	0	0	0	0	0
0.1.40.7.1.1	Bacteria;Lentisphaerae;DEV055;unclassified;unclassified	1	0	1	0	0	0	0	0	0	0
0.1.40.11.4.1	Bacteria;Lentisphaerae;LD1-PB3;uncultured_bacterium;unclassified	1	1	0	0	0	0	0	0	0	0
0.1.40.12.3.1	Bacteria;Lentisphaerae;Lentisphaeria;unclassified;unclassified	1	1	0	0	0	0	0	0	0	0
0.1.40.17.1.1	Bacteria;Lentisphaerae;PBS-III-20;unclassified;unclassified	1	0	1	0	0	0	0	0	0	0
0.1.40.19.6.1	Bacteria;Lentisphaerae;RFP12_gut_group;uncultured_bacterium;unclassified	1	0	1	0	0	0	0	0	0	0
0.1.42.1.1.11	Bacteria;Nitrospirae;Nitrospira;Nitrospirales;wb1-A12	1	0	0	0	0	0	0	1	0	0
0.1.41.5.1.1	Bacteria;NPL-UPA2;uncultured_Verrucomicrobia_bacterium;unclassified;unclassified	1	0	0	0	1	0	0	0	0	0
0.1.44.6.1.1	Bacteria;Planctomycetes;OM190;planctomycete_A-2;unclassified	1	0	1	0	0	0	0	0	0	0
0.1.44.6.10.1	Bacteria;Planctomycetes;OM190;uncultured_microorganism;unclassified	1	0	1	0	0	0	0	0	0	0
0.1.44.7.5.4	Bacteria;Planctomycetes;Phycisphaerae;CCM11a;uncultured_Planctomycetales_bacterium	1	0	1	0	0	0	0	0	0	0
0.1.44.7.5.9	Bacteria;Planctomycetes;Phycisphaerae;CCM11a;uncultured_planctomycete	1	0	0	0	0	0	0	0	1	0
0.1.44.7.6.4	Bacteria;Planctomycetes;Phycisphaerae;CPla-3_termite_group;uncultured_soil_bacterium_PBS-22	1	1	0	0	0	0	0	0	0	0
0.1.44.7.8.2	Bacteria;Planctomycetes;Phycisphaerae;ML-A-10;unclassified	1	0	0	0	0	0	0	1	0	0
0.1.44.7.18.4	Bacteria;Planctomycetes;Phycisphaerae;mle1-8;uncultured_Schlesneria_sp.	1	0	0	0	0	0	0	0	1	0
0.1.44.7.10.2	Bacteria;Planctomycetes;Phycisphaerae;MSBL9;unclassified	1	0	0	0	0	1	0	0	0	0
0.1.44.7.14.5	Bacteria;Planctomycetes;Phycisphaerae;S-70;uncultured_planctomycete	1	1	0	0	0	0	0	0	0	0
0.1.44.7.17.10	Bacteria;Planctomycetes;Phycisphaerae;WD2101_soil_group;uncultured_Planctomycetales_bacterium	1	0	0	0	0	0	0	0	1	0
0.1.44.7.17.17	Bacteria;Planctomycetes;Phycisphaerae;WD2101_soil_group;uncultured_soil_bacterium	1	0	1	0	0	0	0	0	0	0
0.1.44.8.6.1	Bacteria;Planctomycetes;Pla3_lineage;uncultured_planctomycete;unclassified	1	1	0	0	0	0	0	0	0	0
0.1.45.1.5.1	Bacteria;Proteobacteria;AEGEAN-245;uncultured_gamma_proteobacterium;unclassified	1	0	0	0	0	0	0	0	1	0
0.1.45.4.1.2	Bacteria;Proteobacteria;Alphaproteobacteria;4-Org1-14;unclassified	1	0	0	0	0	1	0	0	0	0
0.1.45.4.1.5	Bacteria;Proteobacteria;Alphaproteobacteria;4-Org1-14;uncultured_alpha_proteobacterium	1	0	0	0	0	1	0	0	0	0
0.1.45.4.6.6	Bacteria;Proteobacteria;Alphaproteobacteria;DB1-14;uncultured_Rhizobiales_bacterium	1	1	0	0	0	0	0	0	0	0
0.1.45.4.8.3	Bacteria;Proteobacteria;Alphaproteobacteria;E6aD10;unclassified	1	0	0	0	0	0	1	0	0	0
0.1.45.4.10.1	Bacteria;Proteobacteria;Alphaproteobacteria;Magnetococcales;Magnetococcaceae	1	1	0	0	0	0	0	0	0	0
0.1.45.4.11.22	Bacteria;Proteobacteria;Alphaproteobacteria;OCS116_clade;uncultured_bacterium	1	0	0	0	0	1	0	0	0	0
0.1.45.4.13.7	Bacteria;Proteobacteria;Alphaproteobacteria;Rhizobiales;Bartonellaceae	1	1	0	0	0	0	0	0	0	0
0.1.45.4.13.12	Bacteria;Proteobacteria;Alphaproteobacteria;Rhizobiales;D05-2	1	0	0	1	0	0	0	0	0	0
0.1.45.4.13.13	Bacteria;Proteobacteria;Alphaproteobacteria;Rhizobiales;DUNssu044	1	0	0	0	0	0	0	0	0	1
0.1.45.4.13.17	Bacteria;Proteobacteria;Alphaproteobacteria;Rhizobiales;FFCH5858	1	0	0	0	0	1	0	0	0	0
0.1.45.4.13.37	Bacteria;Proteobacteria;Alphaproteobacteria;Rhizobiales;uncultured	1	0	0	0	0	0	1	0	0	0
0.1.45.4.15.9	Bacteria;Proteobacteria;Alphaproteobacteria;Rhodospirillales;KCM-B-15	1	1	0	0	0	0	0	0	0	0
0.1.45.4.17.2	Bacteria;Proteobacteria;Alphaproteobacteria;S26-47;uncultured_alpha_proteobacterium	1	0	0	0	0	0	0	1	0	0
0.1.45.4.21.7	Bacteria;Proteobacteria;Alphaproteobacteria;Sphingomonadales;Ellin6055	1	0	1	0	0	0	0	0	0	0
0.1.45.4.21.20	Bacteria;Proteobacteria;Alphaproteobacteria;Sphingomonadales;WW2-159	1	0	1	0	0	0	0	0	0	0
0.1.45.6.3.4	Bacteria;Proteobacteria;Betaproteobacteria;B1-7BS;uncultured_beta_proteobacterium	1	1	0	0	0	0	0	0	0	0
0.1.45.6.8.2	Bacteria;Proteobacteria;Betaproteobacteria;Hot_Creek_32;unclassified	1	0	0	0	0	0	0	0	1	0
0.1.45.6.15.29	Bacteria;Proteobacteria;Betaproteobacteria;SC-I-84;uncultured_soil_bacterium	1	0	1	0	0	0	0	0	0	0
0.1.45.6.16.24	Bacteria;Proteobacteria;Betaproteobacteria;TRA3-20;uncultured_soil_bacterium	1	0	1	0	0	0	0	0	0	0
0.1.45.7.5.2	Bacteria;Proteobacteria;Deltaproteobacteria;DTB120;unclassified	1	0	0	0	0	0	0	0	1	0
0.1.45.7.13.7	Bacteria;Proteobacteria;Deltaproteobacteria;GR-WP33-30;uncultured_Acidobacteriales_bacterium	1	0	1	0	0	0	0	0	0	0
0.1.45.7.13.15	Bacteria;Proteobacteria;Deltaproteobacteria;GR-WP33-30;uncultured_Syntrophobacteraceae_bacterium	1	0	0	0	1	0	0	0	0	0
0.1.45.7.14.20	Bacteria;Proteobacteria;Deltaproteobacteria;Myxococcales;uncultured_bacterium	1	0	1	0	0	0	0	0	0	0
0.1.45.7.15.1	Bacteria;Proteobacteria;Deltaproteobacteria;Rs-K70_termite_group;unclassified	1	1	0	0	0	0	0	0	0	0
0.1.45.7.18.19	Bacteria;Proteobacteria;Deltaproteobacteria;Sh765B-TzT-29;uncultured_candidate_division_SBR1093_bacterium	1	1	0	0	0	0	0	0	0	0
0.1.45.7.18.11	Bacteria;Proteobacteria;Deltaproteobacteria;Sh765B-TzT-29;uncultured_Nitrospirae_bacterium	1	0	1	0	0	0	0	0	0	0
0.1.45.7.18.27	Bacteria;Proteobacteria;Deltaproteobacteria;Sh765B-TzT-29;uncultured_proteobacterium	1	0	0	0	0	0	0	0	0	1
0.1.45.7.19.1	Bacteria;Proteobacteria;Deltaproteobacteria;Sva0485;unclassified	1	1	0	0	0	0	0	0	0	0
0.1.45.7.20.2	Bacteria;Proteobacteria;Deltaproteobacteria;Syntrophobacterales;Syntrophobacteraceae	1	1	0	0	0	0	0	0	0	0
0.1.45.11.1.5	Bacteria;Proteobacteria;Gammaproteobacteria;1013-28-CG33;uncultured_soil_bacterium	1	0	0	0	0	0	0	0	1	0
0.1.45.11.7.3	Bacteria;Proteobacteria;Gammaproteobacteria;Alteromonadales;Colwelliaceae	1	0	0	0	0	0	1	0	0	0
0.1.45.11.7.11	Bacteria;Proteobacteria;Gammaproteobacteria;Alteromonadales;unclassified	1	0	0	0	0	1	0	0	0	0
0.1.45.11.9.3	Bacteria;Proteobacteria;Gammaproteobacteria;B38;primary_endosymbiont_of_Liposcelis_decolor_(host_pop._HNZZ)	1	0	1	0	0	0	0	0	0	0
0.1.45.11.18.3	Bacteria;Proteobacteria;Gammaproteobacteria;Chromatiales;Granulosicoccaceae	1	0	1	0	0	0	0	0	0	0
0.1.45.11.21.3	Bacteria;Proteobacteria;Gammaproteobacteria;EC3;uncultured_bacterium	1	0	0	0	1	0	0	0	0	0
0.1.45.11.29.12	Bacteria;Proteobacteria;Gammaproteobacteria;KI89A_clade;uncultured_soil_bacterium	1	0	0	0	1	0	0	0	0	0
0.1.45.11.33.11	Bacteria;Proteobacteria;Gammaproteobacteria;Methylococcales;pItb-vmat-59	1	0	0	0	0	1	0	0	0	0
0.1.45.11.34.1	Bacteria;Proteobacteria;Gammaproteobacteria;NKB5;Legionella-like_amoebal_pathogen_CC99	1	0	1	0	0	0	0	0	0	0
0.1.45.11.36.19	Bacteria;Proteobacteria;Gammaproteobacteria;Oceanospirillales;OM182_clade	1	0	0	0	0	1	0	0	0	0
0.1.45.11.39.4	Bacteria;Proteobacteria;Gammaproteobacteria;P131-4;Sodalis_sp._HS1	1	1	0	0	0	0	0	0	0	0
0.1.45.11.42.1	Bacteria;Proteobacteria;Gammaproteobacteria;Pasteurellales;Pasteurellaceae	1	0	0	1	0	0	0	0	0	0
0.1.45.18.2.1	Bacteria;Proteobacteria;SPOTSOCT00m83;uncultured_bacterium;unclassified	1	0	1	0	0	0	0	0	0	0
0.1.45.20.11.1	Bacteria;Proteobacteria;TA18;uncultured_bacterium_PHOS-HD29;unclassified	1	0	0	0	0	0	0	0	0	1
0.1.50.5.1.1	Bacteria;SM2F11;uncultured_delta_proteobacterium;unclassified;unclassified	1	0	0	0	0	0	0	0	0	1
0.1.50.2.1.1	Bacteria;SM2F11;uncultured_Parcubacteria_bacterium;unclassified;unclassified	1	0	0	0	0	0	0	0	1	0
0.1.51.1.5.3	Bacteria;Spirochaetae;Spirochaetes;Kazan-3B-09;uncultured_bacterium	1	0	0	0	0	0	0	0	0	1
0.1.51.1.14.2	Bacteria;Spirochaetae;Spirochaetes;Spirochaetales;Brevinemataceae	1	1	0	0	0	0	0	0	0	0
0.1.51.1.14.8	Bacteria;Spirochaetae;Spirochaetes;Spirochaetales;V2072-189E03	1	0	0	0	0	1	0	0	0	0
0.1.54.21.1.1	Bacteria;TM6;uncultured_prokaryote;unclassified;unclassified	1	0	0	0	0	0	0	0	1	0
0.1.58.2.26.1	Bacteria;Verrucomicrobia;OPB35_soil_group;uncultured_Verrucomicrobia_subdivision_3_bacterium;unclassified	1	1	0	0	0	0	0	0	0	0
0.1.58.2.2.1	Bacteria;Verrucomicrobia;OPB35_soil_group;Unknown_Order;Unknown_Family	1	1	0	0	0	0	0	0	0	0
0.1.58.4.1.1	Bacteria;Verrucomicrobia;S-BQ2-57_soil_group;unclassified;unclassified	1	0	1	0	0	0	0	0	0	0
0.1.58.4.2.1	Bacteria;Verrucomicrobia;S-BQ2-57_soil_group;uncultured_Verrucomicrobia_bacterium;unclassified	1	0	1	0	0	0	0	0	0	0
0.1.58.5.1.1	Bacteria;Verrucomicrobia;Spartobacteria;Chthoniobacterales;01D2Z36	1	0	1	0	0	0	0	0	0	0
0.1.58.6.3.1	Bacteria;Verrucomicrobia;UA11;uncultured_soil_bacterium;unclassified	1	1	0	0	0	0	0	0	0	0
0.1.58.10.1.1	Bacteria;Verrucomicrobia;uncultured_bacterium;unclassified;unclassified	1	0	1	0	0	0	0	0	0	0
0.1.60.1.1.1	Bacteria;WD272;unclassified;unclassified;unclassified	1	0	0	0	0	1	0	0	0	0
0.1.60.2.1.1	Bacteria;WD272;uncultured_Acidobacteria_bacterium;unclassified;unclassified	1	0	1	0	0	0	0	0	0	0
0.1.1.1.10.5	Bacteria;Acidobacteria;Acidobacteria;Subgroup_17;uncultured_Acidobacterium_sp.	0	0	0	0	0	0	0	0	0	0
0.1.1.1.11.6	Bacteria;Acidobacteria;Acidobacteria;Subgroup_18;uncultured_soil_bacterium	0	0	0	0	0	0	0	0	0	0
0.1.1.1.13.10	Bacteria;Acidobacteria;Acidobacteria;Subgroup_2;uncultured_Holophaga_sp.	0	0	0	0	0	0	0	0	0	0
0.1.1.1.20.34	Bacteria;Acidobacteria;Acidobacteria;Subgroup_6;uncultured_bacterium_259	0	0	0	0	0	0	0	0	0	0
0.1.1.1.20.58	Bacteria;Acidobacteria;Acidobacteria;Subgroup_6;uncultured_microorganism	0	0	0	0	0	0	0	0	0	0
0.1.1.2.9.2	Bacteria;Acidobacteria;Holophagae;Subgroup_7;freshwater_sediment_metagenome	0	0	0	0	0	0	0	0	0	0
0.1.2.1.1.9	Bacteria;Actinobacteria;Acidimicrobiia;Acidimicrobiales;uncultured_bacterium	0	0	0	0	0	0	0	0	0	0
0.1.2.2.1.1	Bacteria;Actinobacteria;Actinobacteria;Actinomycetales;Actinomycetaceae	0	0	0	0	0	0	0	0	0	0
0.1.2.2.4.1	Bacteria;Actinobacteria;Actinobacteria;Bifidobacteriales;Bifidobacteriaceae	0	0	0	0	0	0	0	0	0	0
0.1.2.2.8.1	Bacteria;Actinobacteria;Actinobacteria;Frankiales;Acidothermaceae	0	0	0	0	0	0	0	0	0	0
0.1.2.2.8.3	Bacteria;Actinobacteria;Actinobacteria;Frankiales;Frankiaceae	0	0	0	0	0	0	0	0	0	0
0.1.2.2.11.1	Bacteria;Actinobacteria;Actinobacteria;Micrococcales;AKAU3644	0	0	0	0	0	0	0	0	0	0
0.1.2.2.11.5	Bacteria;Actinobacteria;Actinobacteria;Micrococcales;Cellulomonadaceae	0	0	0	0	0	0	0	0	0	0
0.1.2.2.11.9	Bacteria;Actinobacteria;Actinobacteria;Micrococcales;Dermabacteraceae	0	0	0	0	0	0	0	0	0	0
0.1.2.2.11.14	Bacteria;Actinobacteria;Actinobacteria;Micrococcales;Jonesiaceae	0	0	0	0	0	0	0	0	0	0
0.1.2.2.13.9	Bacteria;Actinobacteria;Actinobacteria;PeM15;uncultured_bacterium	0	0	0	0	0	0	0	0	0	0
0.1.2.2.17.1	Bacteria;Actinobacteria;Actinobacteria;Streptomycetales;Streptomycetaceae	0	0	0	0	0	0	0	0	0	0
0.1.2.6.10.1	Bacteria;Actinobacteria;MB-A2-108;uncultured_actinobacterium;unclassified	0	0	0	0	0	0	0	0	0	0
0.1.2.7.2.1	Bacteria;Actinobacteria;Nitriliruptoria;Nitriliruptorales;Nitriliruptoraceae	0	0	0	0	0	0	0	0	0	0
0.1.2.8.2.1	Bacteria;Actinobacteria;OPB41;uncultured_actinobacterium;unclassified	0	0	0	0	0	0	0	0	0	0
0.1.2.11.2.2	Bacteria;Actinobacteria;Thermoleophilia;Solirubrobacterales;288-2	0	0	0	0	0	0	0	0	0	0
0.1.3.1.1.3	Bacteria;Aquificae;Aquificae;Aquificales;Desulfurobacteriaceae	0	0	0	0	0	0	0	0	0	0
0.1.3.1.1.4	Bacteria;Aquificae;Aquificae;Aquificales;Hydrogenothermaceae	0	0	0	0	0	0	0	0	0	0
0.1.7.4.1.15	Bacteria;Bacteroidetes;Bacteroidia;Bacteroidales;MgMjR-022	0	0	0	0	0	0	0	0	0	0
0.1.7.4.1.26	Bacteria;Bacteroidetes;Bacteroidia;Bacteroidales;p-2534-18B5_gut_group	0	0	0	0	0	0	0	0	0	0
0.1.7.1.1.1	Bacteria;Bacteroidetes;BD2-2;unclassified;unclassified	0	0	0	0	0	0	0	0	0	0
0.1.7.1.16.1	Bacteria;Bacteroidetes;BD2-2;uncultured_soil_bacterium;unclassified	0	0	0	0	0	0	0	0	0	0
0.1.7.5.3.4	Bacteria;Bacteroidetes;Cytophagia;Order_III;CK06-06-Mud-MAS4B-21	0	0	0	0	0	0	0	0	0	0
0.1.7.5.3.10	Bacteria;Bacteroidetes;Cytophagia;Order_III;unclassified	0	0	0	0	0	0	0	0	0	0
0.1.7.9.15.1	Bacteria;Bacteroidetes;SB-1;uncultured_bacterium;unclassified	0	0	0	0	0	0	0	0	0	0
0.1.7.13.1.2	Bacteria;Bacteroidetes;Sphingobacteriia;Sphingobacteriales;B01R012	0	0	0	0	0	0	0	0	0	0
0.1.7.17.7.1	Bacteria;Bacteroidetes;vadinHA17;uncultured_Bacteroidetes_bacterium;unclassified	0	0	0	0	0	0	0	0	0	0
0.1.9.1.1.2	Bacteria;Caldiserica;Caldisericia;Caldisericales;Caldisericaceae	0	0	0	0	0	0	0	0	0	0
0.1.9.1.1.6	Bacteria;Caldiserica;Caldisericia;Caldisericales;WCHB1-02	0	0	0	0	0	0	0	0	0	0
0.1.10.7.1.1	Bacteria;Candidate_division_BRC1;uncultured_Desulfocaldus_sp.;unclassified;unclassified	0	0	0	0	0	0	0	0	0	0
0.1.15.5.1.1	Bacteria;Candidate_division_OP3;uncultured_Clostridiales_bacterium;unclassified;unclassified	0	0	0	0	0	0	0	0	0	0
0.1.16.3.1.1	Bacteria;Candidate_division_OP8;unclassified;unclassified;unclassified	0	0	0	0	0	0	0	0	0	0
0.1.16.6.1.1	Bacteria;Candidate_division_OP8;uncultured_bacterium;unclassified;unclassified	0	0	0	0	0	0	0	0	0	0
0.1.17.5.1.1	Bacteria;Candidate_division_OP9;uncultured_bacterium;unclassified;unclassified	0	0	0	0	0	0	0	0	0	0
0.1.20.29.1.1	Bacteria;Candidate_division_WS3;uncultured_soil_bacterium_PBS-II-5;unclassified;unclassified	0	0	0	0	0	0	0	0	0	0
0.1.20.4.1.1	Bacteria;Candidate_division_WS3;Unknown_Class;Unknown_Order;Unknown_Family	0	0	0	0	0	0	0	0	0	0
0.1.23.1.1.1	Bacteria;Chlorobi;Chlorobia;Chlorobiales;Chlorobiaceae	0	0	0	0	0	0	0	0	0	0
0.1.23.2.1.6	Bacteria;Chlorobi;Ignavibacteria;Ignavibacteriales;IheB3-7	0	0	0	0	0	0	0	0	0	0
0.1.24.2.3.4	Bacteria;Chloroflexi;Ardenticatenia;uncultured;uncultured_Caldilineaceae_bacterium	0	0	0	0	0	0	0	0	0	0
0.1.24.5.1.8	Bacteria;Chloroflexi;Chloroflexia;AKIW781;uncultured_soil_bacterium	0	0	0	0	0	0	0	0	0	0
0.1.24.6.4.5	Bacteria;Chloroflexi;Dehalococcoidia;GIF3;uncultured_bacterium	0	0	0	0	0	0	0	0	0	0
0.1.24.6.5.4	Bacteria;Chloroflexi;Dehalococcoidia;GIF9;uncultured_bacterium	0	0	0	0	0	0	0	0	0	0
0.1.24.6.6.1	Bacteria;Chloroflexi;Dehalococcoidia;MSBL5;unclassified	0	0	0	0	0	0	0	0	0	0
0.1.24.6.8.5	Bacteria;Chloroflexi;Dehalococcoidia;Sh765B-AG-111;uncultured_bacterium	0	0	0	0	0	0	0	0	0	0
0.1.24.6.9.1	Bacteria;Chloroflexi;Dehalococcoidia;unclassified;unclassified	0	0	0	0	0	0	0	0	0	0
0.1.24.6.12.8	Bacteria;Chloroflexi;Dehalococcoidia;vadinBA26;uncultured_bacterium	0	0	0	0	0	0	0	0	0	0
0.1.24.13.3.1	Bacteria;Chloroflexi;Ktedonobacteria;C0119;unclassified	0	0	0	0	0	0	0	0	0	0
0.1.24.13.3.5	Bacteria;Chloroflexi;Ktedonobacteria;C0119;uncultured_soil_bacterium	0	0	0	0	0	0	0	0	0	0
0.1.24.18.6.1	Bacteria;Chloroflexi;SHA-26;uncultured_Dehalogenimonas_sp.;unclassified	0	0	0	0	0	0	0	0	0	0
0.1.24.18.8.1	Bacteria;Chloroflexi;SHA-26;uncultured_soil_bacterium;unclassified	0	0	0	0	0	0	0	0	0	0
0.1.24.21.2.8	Bacteria;Chloroflexi;Thermomicrobia;JG30-KF-CM45;uncultured_endolithic_bacterium	0	0	0	0	0	0	0	0	0	0
0.1.24.23.1.1	Bacteria;Chloroflexi;uncultured;Dehalococcoides_sp._BHI80-15;unclassified	0	0	0	0	0	0	0	0	0	0
0.1.26.4.2.1	Bacteria;Cyanobacteria;Melainabacteria;Gastranaerophilales;Acinetobacter_sp._CAG:196	0	0	0	0	0	0	0	0	0	0
0.1.26.4.2.2	Bacteria;Cyanobacteria;Melainabacteria;Gastranaerophilales;Clostridium_sp._CAG:306	0	0	0	0	0	0	0	0	0	0
0.1.26.4.2.11	Bacteria;Cyanobacteria;Melainabacteria;Gastranaerophilales;uncultured_rumen_bacterium	0	0	0	0	0	0	0	0	0	0
0.1.26.3.4.1	Bacteria;Cyanobacteria;ML635J-21;uncultured_Gram-positive_bacterium;unclassified	0	0	0	0	0	0	0	0	0	0
0.1.30.1.2.1	Bacteria;Elusimicrobia;Elusimicrobia;Elusimicrobiales;Elusimicrobiaceae	0	0	0	0	0	0	0	0	0	0
0.1.30.1.8.2	Bacteria;Elusimicrobia;Elusimicrobia;Lineage_I_(Endomicrobia);unclassified	0	0	0	0	0	0	0	0	0	0
0.1.30.1.11.1	Bacteria;Elusimicrobia;Elusimicrobia;Rs-M47;unclassified	0	0	0	0	0	0	0	0	0	0
0.1.31.1.1.1	Bacteria;Fibrobacteres;Fibrobacteria;Fibrobacterales;09D2Z46	0	0	0	0	0	0	0	0	0	0
0.1.31.1.1.7	Bacteria;Fibrobacteres;Fibrobacteria;Fibrobacterales;MAT-CR-H6-H10	0	0	0	0	0	0	0	0	0	0
0.1.32.1.2.1	Bacteria;Firmicutes;Bacilli;Bacillales;Alicyclobacillaceae	0	0	0	0	0	0	0	0	0	0
0.1.32.2.1.1	Bacteria;Firmicutes;Clostridia;Clostridia_Incertae_Sedis;Unknown_Family	0	0	0	0	0	0	0	0	0	0
0.1.32.2.2.10	Bacteria;Firmicutes;Clostridia;Clostridiales;Eubacteriaceae	0	0	0	0	0	0	0	0	0	0
0.1.32.2.2.21	Bacteria;Firmicutes;Clostridia;Clostridiales;JTB215	0	0	0	0	0	0	0	0	0	0
0.1.32.4.1.3	Bacteria;Firmicutes;Negativicutes;Selenomonadales;unclassified	0	0	0	0	0	0	0	0	0	0
0.1.32.5.4.1	Bacteria;Firmicutes;OPB54;unclassified;unclassified	0	0	0	0	0	0	0	0	0	0
0.1.33.1.1.4	Bacteria;Fusobacteria;Fusobacteriia;Fusobacteriales;Hados.Sed.Eubac.3	0	0	0	0	0	0	0	0	0	0
0.1.36.1.2.9	Bacteria;Gemmatimonadetes;Gemmatimonadetes;BD2-11_terrestrial_group;uncultured_Gemmatimonadetes_bacterium	0	0	0	0	0	0	0	0	0	0
0.1.36.1.6.3	Bacteria;Gemmatimonadetes;Gemmatimonadetes;S0134_terrestrial_group;uncultured_Gemmatimonadetes_bacterium	0	0	0	0	0	0	0	0	0	0
0.1.40.4.4.1	Bacteria;Lentisphaerae;BS5;uncultured_bacterium;unclassified	0	0	0	0	0	0	0	0	0	0
0.1.40.15.1.1	Bacteria;Lentisphaerae;MSBL3;unclassified;unclassified	0	0	0	0	0	0	0	0	0	0
0.1.40.16.3.2	Bacteria;Lentisphaerae;Oligosphaeria;Oligosphaerales;Oligosphaeraceae	0	0	0	0	0	0	0	0	0	0
0.1.40.16.3.3	Bacteria;Lentisphaerae;Oligosphaeria;Oligosphaerales;unclassified	0	0	0	0	0	0	0	0	0	0
0.1.40.16.3.6	Bacteria;Lentisphaerae;Oligosphaeria;Oligosphaerales;uncultured_bacterium	0	0	0	0	0	0	0	0	0	0
0.1.40.16.3.5	Bacteria;Lentisphaerae;Oligosphaeria;Oligosphaerales;uncultured_Verrucomicrobia_bacterium	0	0	0	0	0	0	0	0	0	0
0.1.40.16.8.1	Bacteria;Lentisphaerae;Oligosphaeria;uncultured_bacterium;unclassified	0	0	0	0	0	0	0	0	0	0
0.1.40.16.7.1	Bacteria;Lentisphaerae;Oligosphaeria;uncultured_Verrucomicrobia_bacterium;unclassified	0	0	0	0	0	0	0	0	0	0
0.1.40.19.1.1	Bacteria;Lentisphaerae;RFP12_gut_group;bacterium_enrichment_culture_clone_JCA3;unclassified	0	0	0	0	0	0	0	0	0	0
0.1.40.19.3.1	Bacteria;Lentisphaerae;RFP12_gut_group;unclassified;unclassified	0	0	0	0	0	0	0	0	0	0
0.1.40.19.4.1	Bacteria;Lentisphaerae;RFP12_gut_group;uncultured_Verrucomicrobia_bacterium;unclassified	0	0	0	0	0	0	0	0	0	0
0.1.40.22.4.1	Bacteria;Lentisphaerae;WCHB1-25;uncultured_bacterium;unclassified	0	0	0	0	0	0	0	0	0	0
0.1.41.6.1.1	Bacteria;NPL-UPA2;uncultured_anaerobic_bacterium;unclassified;unclassified	0	0	0	0	0	0	0	0	0	0
0.1.44.6.5.1	Bacteria;Planctomycetes;OM190;uncultured_Planctomycetaceae_bacterium;unclassified	0	0	0	0	0	0	0	0	0	0
0.1.44.7.7.2	Bacteria;Planctomycetes;Phycisphaerae;KCLunmb-38-53;uncultured_bacterium	0	0	0	0	0	0	0	0	0	0
0.1.44.7.10.5	Bacteria;Planctomycetes;Phycisphaerae;MSBL9;uncultured_bacterium	0	0	0	0	0	0	0	0	0	0
0.1.44.7.12.7	Bacteria;Planctomycetes;Phycisphaerae;Phycisphaerales;Sva0503	0	0	0	0	0	0	0	0	0	0
0.1.44.7.15.2	Bacteria;Planctomycetes;Phycisphaerae;S15A-MN16;uncultured_Planctomycetaceae_bacterium	0	0	0	0	0	0	0	0	0	0
0.1.44.7.16.7	Bacteria;Planctomycetes;Phycisphaerae;SHA-43;uncultured_planctomycete	0	0	0	0	0	0	0	0	0	0
0.1.44.14.11.1	Bacteria;Planctomycetes;vadinHA49;uncultured_organism;unclassified	0	0	0	0	0	0	0	0	0	0
0.1.44.14.15.1	Bacteria;Planctomycetes;vadinHA49;wastewater_metagenome;unclassified	0	0	0	0	0	0	0	0	0	0
0.1.45.4.13.10	Bacteria;Proteobacteria;Alphaproteobacteria;Rhizobiales;Brucellaceae	0	0	0	0	0	0	0	0	0	0
0.1.45.4.13.14	Bacteria;Proteobacteria;Alphaproteobacteria;Rhizobiales;DUNssu371	0	0	0	0	0	0	0	0	0	0
0.1.45.4.15.2	Bacteria;Proteobacteria;Alphaproteobacteria;Rhodospirillales;AT-s3-44	0	0	0	0	0	0	0	0	0	0
0.1.45.4.21.14	Bacteria;Proteobacteria;Alphaproteobacteria;Sphingomonadales;Plot4-2H12	0	0	0	0	0	0	0	0	0	0
0.1.45.6.3.2	Bacteria;Proteobacteria;Betaproteobacteria;B1-7BS;uncultured_Denitratisoma_sp.	0	0	0	0	0	0	0	0	0	0
0.1.45.6.4.1	Bacteria;Proteobacteria;Betaproteobacteria;Betaproteobacteria_Incertae_Sedis;Unknown_Family	0	0	0	0	0	0	0	0	0	0
0.1.45.6.5.3	Bacteria;Proteobacteria;Betaproteobacteria;Burkholderiales;Burkholderiales_Incertae_Sedis	0	0	0	0	0	0	0	0	0	0
0.1.45.6.19.3	Bacteria;Proteobacteria;Betaproteobacteria;oca12;uncultured_bacterium	0	0	0	0	0	0	0	0	0	0
0.1.45.6.15.21	Bacteria;Proteobacteria;Betaproteobacteria;SC-I-84;uncultured_beta_proteobacterium	0	0	0	0	0	0	0	0	0	0
0.1.45.6.15.13	Bacteria;Proteobacteria;Betaproteobacteria;SC-I-84;uncultured_Burkholderia_sp.	0	0	0	0	0	0	0	0	0	0
0.1.45.6.15.17	Bacteria;Proteobacteria;Betaproteobacteria;SC-I-84;uncultured_Nitrosomonadaceae_bacterium	0	0	0	0	0	0	0	0	0	0
0.1.45.6.15.18	Bacteria;Proteobacteria;Betaproteobacteria;SC-I-84;uncultured_Rhodocyclaceae_bacterium	0	0	0	0	0	0	0	0	0	0
0.1.45.7.2.3	Bacteria;Proteobacteria;Deltaproteobacteria;43F-1404R;uncultured_Geobacter_sp.	0	0	0	0	0	0	0	0	0	0
0.1.45.7.2.9	Bacteria;Proteobacteria;Deltaproteobacteria;43F-1404R;uncultured_prokaryote	0	0	0	0	0	0	0	0	0	0
0.1.45.7.6.1	Bacteria;Proteobacteria;Deltaproteobacteria;Deltaproteobacteria_Incertae_Sedis;Syntrophorhabdaceae	0	0	0	0	0	0	0	0	0	0
0.1.45.7.9.5	Bacteria;Proteobacteria;Deltaproteobacteria;Desulfovibrionales;unclassified	0	0	0	0	0	0	0	0	0	0
0.1.45.7.11.16	Bacteria;Proteobacteria;Deltaproteobacteria;Desulfuromonadales;MA-28-I98C	0	0	0	0	0	0	0	0	0	0
0.1.45.7.13.3	Bacteria;Proteobacteria;Deltaproteobacteria;GR-WP33-30;delta_proteobacterium_WX152	0	0	0	0	0	0	0	0	0	0
0.1.45.7.16.1	Bacteria;Proteobacteria;Deltaproteobacteria;SAR324_clade(Marine_group_B);Candidatus_Nitrosoarchaeum_limnia_SFB1	0	0	0	0	0	0	0	0	0	0
0.1.45.7.18.14	Bacteria;Proteobacteria;Deltaproteobacteria;Sh765B-TzT-29;uncultured_bacterium	0	0	0	0	0	0	0	0	0	0
0.1.45.7.18.10	Bacteria;Proteobacteria;Deltaproteobacteria;Sh765B-TzT-29;uncultured_Myxococcales_bacterium	0	0	0	0	0	0	0	0	0	0
0.1.45.7.18.29	Bacteria;Proteobacteria;Deltaproteobacteria;Sh765B-TzT-29;uncultured_soil_bacterium	0	0	0	0	0	0	0	0	0	0
0.1.45.9.5.1	Bacteria;Proteobacteria;Epsilonproteobacteria;Nautiliales;Nautiliaceae	0	0	0	0	0	0	0	0	0	0
0.1.45.11.3.4	Bacteria;Proteobacteria;Gammaproteobacteria;34P16;uncultured_Pseudomonadales_bacterium	0	0	0	0	0	0	0	0	0	0
0.1.45.11.5.2	Bacteria;Proteobacteria;Gammaproteobacteria;Aeromonadales;JI49D030	0	0	0	0	0	0	0	0	0	0
0.1.45.11.5.4	Bacteria;Proteobacteria;Gammaproteobacteria;Aeromonadales;Succinivibrionaceae	0	0	0	0	0	0	0	0	0	0
0.1.45.11.7.5	Bacteria;Proteobacteria;Gammaproteobacteria;Alteromonadales;Idiomarinaceae	0	0	0	0	0	0	0	0	0	0
0.1.45.11.11.3	Bacteria;Proteobacteria;Gammaproteobacteria;BD7-8_marine_group;endosymbiont_of_Ifremeria_nautilei	0	0	0	0	0	0	0	0	0	0
0.1.45.11.43.3	Bacteria;Proteobacteria;Gammaproteobacteria;Pseudomonadales;unclassified	0	0	0	0	0	0	0	0	0	0
0.1.45.11.53.1	Bacteria;Proteobacteria;Gammaproteobacteria;WN-HWB-116;unclassified	0	0	0	0	0	0	0	0	0	0
0.1.45.12.4.1	Bacteria;Proteobacteria;JTB23;unclassified;unclassified	0	0	0	0	0	0	0	0	0	0
0.1.45.12.5.1	Bacteria;Proteobacteria;JTB23;uncultured_bacterium;unclassified	0	0	0	0	0	0	0	0	0	0
0.1.45.18.3.1	Bacteria;Proteobacteria;SPOTSOCT00m83;uncultured_gamma_proteobacterium;unclassified	0	0	0	0	0	0	0	0	0	0
0.1.49.10.1.1	Bacteria;SHA-109;uncultured_soil_bacterium;unclassified;unclassified	0	0	0	0	0	0	0	0	0	0
0.1.51.1.4.1	Bacteria;Spirochaetae;Spirochaetes;GZKB75;unclassified	0	0	0	0	0	0	0	0	0	0
0.1.51.1.4.2	Bacteria;Spirochaetae;Spirochaetes;GZKB75;uncultured_bacterium	0	0	0	0	0	0	0	0	0	0
0.1.51.1.7.4	Bacteria;Spirochaetae;Spirochaetes;LNR_A2-18;uncultured_bacterium	0	0	0	0	0	0	0	0	0	0
0.1.51.1.14.1	Bacteria;Spirochaetae;Spirochaetes;Spirochaetales;Brachyspiraceae	0	0	0	0	0	0	0	0	0	0
0.1.51.1.14.9	Bacteria;Spirochaetae;Spirochaetes;Spirochaetales;unclassified	0	0	0	0	0	0	0	0	0	0
0.1.55.1.1.1	Bacteria;Tenericutes;Mollicutes;Acholeplasmatales;Acholeplasmataceae	0	0	0	0	0	0	0	0	0	0
0.1.55.1.2.1	Bacteria;Tenericutes;Mollicutes;Anaeroplasmatales;Anaeroplasmataceae	0	0	0	0	0	0	0	0	0	0
0.1.55.1.7.1	Bacteria;Tenericutes;Mollicutes;Haloplasmatales;Haloplasmataceae	0	0	0	0	0	0	0	0	0	0
0.1.55.1.11.5	Bacteria;Tenericutes;Mollicutes;RF9;human_gut_metagenome	0	0	0	0	0	0	0	0	0	0
0.1.55.1.11.15	Bacteria;Tenericutes;Mollicutes;RF9;uncultured_bacterium_adhufec202	0	0	0	0	0	0	0	0	0	0
0.1.55.1.11.10	Bacteria;Tenericutes;Mollicutes;RF9;uncultured_Firmicutes_bacterium	0	0	0	0	0	0	0	0	0	0
0.1.55.1.11.17	Bacteria;Tenericutes;Mollicutes;RF9;uncultured_organism	0	0	0	0	0	0	0	0	0	0
0.1.56.1.1.1	Bacteria;Thermodesulfobacteria;Thermodesulfobacteria;Thermodesulfobacteriales;Thermodesulfobacteriaceae	0	0	0	0	0	0	0	0	0	0
0.1.57.1.1.1	Bacteria;Thermotogae;Thermotogae;Thermotogales;Thermotogaceae	0	0	0	0	0	0	0	0	0	0
0.1.58.2.15.1	Bacteria;Verrucomicrobia;OPB35_soil_group;bacterium_enrichment_culture_clone_R4-41B;unclassified	0	0	0	0	0	0	0	0	0	0
0.1.58.2.1.1	Bacteria;Verrucomicrobia;OPB35_soil_group;Oikopleura_dioica;unclassified	0	0	0	0	0	0	0	0	0	0
0.1.58.2.32.1	Bacteria;Verrucomicrobia;OPB35_soil_group;uncultured_rumen_bacterium;unclassified	0	0	0	0	0	0	0	0	0	0
0.1.58.3.13.4	Bacteria;Verrucomicrobia;Opitutae;vadinHA64;uncultured_Opitutae_bacterium	0	0	0	0	0	0	0	0	0	0
