# Supplementary material for: Metagenomic identification of active methanogens and methanotrophs in serpentinite springs of the Voltri Massif, Italy
Source: PeerJ. 2017 Jan 26;5:e2945. doi: 10.7717/peerj.2945 (PMC5274519; doi:10.7717/peerj.2945)
Supplement: File S3 [file peerj-05-2945-s003.xlsx]

## Sheet: percent
mothur rankID	Archaeal family	All samples	BR2-river-2012a	BR2-river-2012b	GOR34-spring1-2011	GOR34-river-2012a	GOR34-river-2012b	GOR34-spring1-2013a	GOR34-spring1-2013b	GOR34-river-2013a	GOR34-river-2013b
0	All families	402139	36474	29855	724	33999	115	267	101232	94369	851
0.1.1.1.1.1	Archaea;Aenigmarchaeota;Aenigmarchaeota_Incertae_Sedis;Unknown_Order;Unknown_Family	0.000258617	0.00128859	0.000602914	0	8.82379e-05	0	0	7.90264e-05	0	0
0.1.1.2.2.1	Archaea;Aenigmarchaeota;Deep_Sea_Euryarchaeotic_Group(DSEG);archaeon_GW2011_AR5;unclassified	0.000300891	0.00167242	0.00110534	0	8.82379e-05	0	0	8.89047e-05	2.11934e-05	0
0.1.1.2.3.1	Archaea;Aenigmarchaeota;Deep_Sea_Euryarchaeotic_Group(DSEG);hypersaline_lake_metagenome;unclassified	2.4867e-05	0	0	0	0	0	0	0	0	0
0.1.1.2.4.1	Archaea;Aenigmarchaeota;Deep_Sea_Euryarchaeotic_Group(DSEG);unclassified;unclassified	0.0116054	0.0239074	0.00998158	0.0262431	0.00817671	0	0.0149813	0.00700371	0.0240227	0.0211516
0.1.1.2.9.1	Archaea;Aenigmarchaeota;Deep_Sea_Euryarchaeotic_Group(DSEG);uncultured_archaeon_pPCA7.17;unclassified	0.000213856	0.000219334	0.000133981	0	0.000147063	0	0	0	0.000339094	0
0.1.1.2.7.1	Archaea;Aenigmarchaeota;Deep_Sea_Euryarchaeotic_Group(DSEG);uncultured_archaeon;unclassified	0.0139504	0.0550803	0.0329593	0.00138122	0.00441189	0	0.00374532	0.00420816	0.0141254	0.0141011
0.1.1.2.5.1	Archaea;Aenigmarchaeota;Deep_Sea_Euryarchaeotic_Group(DSEG);uncultured_Methanobacteriaceae_archaeon;unclassified	1.74069e-05	2.74168e-05	3.34952e-05	0	0	0	0	9.8783e-06	0	0
0.1.1.2.12.1	Archaea;Aenigmarchaeota;Deep_Sea_Euryarchaeotic_Group(DSEG);uncultured_sediment_archaeon;unclassified	1.24335e-05	5.48336e-05	6.69905e-05	0	0	0	0	0	0	0
0.1.1.3.1.1	Archaea;Aenigmarchaeota;unclassified;unclassified;unclassified	0.00142985	0.00150792	0.00120583	0.00690608	0.000176476	0	0	0.00321045	0.00123981	0.00117509
0.1.5.1.1.1	Archaea;Diapherotrites;Diapherotrites_Incertae_Sedis;Unknown_Order;Unknown_Family	0.00300642	0.0081702	0.00435438	0.0165746	0.0037354	0	0.00374532	0.00134345	0.00349691	0
0.1.5.2.1.1	Archaea;Diapherotrites;unclassified;unclassified;unclassified	6.96277e-05	0.000191918	0	0	8.82379e-05	0	0	5.92698e-05	6.35802e-05	0
0.1.5.3.1.1	Archaea;Diapherotrites;uncultured_archaeon;unclassified;unclassified	0.00149948	8.22504e-05	0	0	0.00550016	0	0	9.8783e-06	0.00406913	0.00352526
0.1.6.2.1.1	Archaea;Euryarchaeota;Halobacteria;Halobacteriales;Halobacteriaceae	0.000320785	5.48336e-05	0.000401943	0	8.82379e-05	0	0	0	0	0
0.1.6.3.1.1	Archaea;Euryarchaeota;Methanobacteria;Methanobacteriales;Methanobacteriaceae	0.267696	0.000603169	0.000870876	0.290055	0.000705903	0.373913	0.707865	0.883189	0.00134578	0.0904818
0.1.6.5.1.3	Archaea;Euryarchaeota;Methanomicrobia;AK5;uncultured_archaeon	2.4867e-06	0	0	0	2.94126e-05	0	0	0	0	0
0.1.6.5.1.2	Archaea;Euryarchaeota;Methanomicrobia;AK5;uncultured_Methanomicrobia_archaeon	2.4867e-06	0	0	0	0	0	0	0	0	0
0.1.6.5.2.1	Archaea;Euryarchaeota;Methanomicrobia;ANME-1;ANME-1a	2.4867e-06	0	0	0	0	0	0.00374532	0	0	0
0.1.6.5.2.2	Archaea;Euryarchaeota;Methanomicrobia;ANME-1;ANME-1b	9.94681e-06	0	0	0	0	0.026087	0	9.8783e-06	0	0
0.1.6.5.4.2	Archaea;Euryarchaeota;Methanomicrobia;Methanocellales;Methanocellaceae	0.0180609	0	0	0	0	0	0	0	0.000286111	0
0.1.6.5.4.5	Archaea;Euryarchaeota;Methanomicrobia;Methanocellales;uncultured_archaeon	0.000278511	0	0	0	0	0	0	0	0.000286111	0
0.1.6.5.5.6	Archaea;Euryarchaeota;Methanomicrobia;Methanomicrobiales;Methanocorpusculaceae	0.00146467	0	0	0	0.000117651	0	0	0	0	0
0.1.6.5.5.9	Archaea;Euryarchaeota;Methanomicrobia;Methanomicrobiales;Methanoregulaceae	0.00672902	0.000164501	0.000267962	0	0.00835319	0	0	0.000306227	0.000201337	0
0.1.6.5.5.10	Archaea;Euryarchaeota;Methanomicrobia;Methanomicrobiales;Methanospirillaceae	0.00381211	0.000164501	0.000133981	0	0.00197065	0.026087	0	0	0.000222531	0
0.1.6.5.5.5	Archaea;Euryarchaeota;Methanomicrobia;Methanomicrobiales;MHLsu47-B8A	9.94681e-06	0	0	0	0	0	0	3.95132e-05	0	0
0.1.6.5.5.11	Archaea;Euryarchaeota;Methanomicrobia;Methanomicrobiales;Rice_Cluster_II	2.4867e-06	0	0	0	0	0	0	0	0	0
0.1.6.5.5.14	Archaea;Euryarchaeota;Methanomicrobia;Methanomicrobiales;unclassified	0.000338192	0	0	0	0	0	0	9.8783e-06	0	0
0.1.6.5.6.3	Archaea;Euryarchaeota;Methanomicrobia;Methanosarcinales;GOM_Arc_I	0.000937487	0.00202884	0.00485681	0.0220994	0.000176476	0	0	0	0	0
0.1.6.5.6.5	Archaea;Euryarchaeota;Methanomicrobia;Methanosarcinales;Methanosaetaceae	0.0131447	0.000356418	0.000669905	0	0.0184123	0.00869565	0.00749064	0.011854	0.00136697	0
0.1.6.5.6.6	Archaea;Euryarchaeota;Methanomicrobia;Methanosarcinales;Methanosarcinaceae	0.00496346	0.000191918	0.000569419	0	0.00135298	0.226087	0.101124	0.00117552	0.00101728	0.186839
0.1.6.5.6.7	Archaea;Euryarchaeota;Methanomicrobia;Methanosarcinales;Methermicoccaceae	7.46011e-06	0	0	0	0	0.0173913	0.00374532	0	0	0
0.1.6.5.7.4	Archaea;Euryarchaeota;Methanomicrobia;ST-12K10A;uncultured_euryarchaeote	2.4867e-06	0	0	0	0	0	0	0	0	0
0.1.6.8.8.2	Archaea;Euryarchaeota;Thermoplasmata;Marine_Benthic_Group_E;uncultured_archaeon	2.98404e-05	0	0.000100486	0	0	0	0	0	0	0
0.1.6.8.8.7	Archaea;Euryarchaeota;Thermoplasmata;Marine_Benthic_Group_E;uncultured_euryarchaeote	0.000188989	5.48336e-05	6.69905e-05	0	0.000470602	0	0	0.000553185	0	0
0.1.6.8.7.2	Archaea;Euryarchaeota;Thermoplasmata;MSBL1;unclassified	2.4867e-05	0	0	0	0	0	0	0	0	0
0.1.6.8.7.3	Archaea;Euryarchaeota;Thermoplasmata;MSBL1;uncultured_archaeon	7.46011e-06	0	0	0	0	0	0	0	0	0
0.1.6.8.7.4	Archaea;Euryarchaeota;Thermoplasmata;MSBL1;uncultured_candidate_division_MSBL1_archaeon	2.4867e-05	0	0	0	0	0	0	0	0	0
0.1.6.8.9.1	Archaea;Euryarchaeota;Thermoplasmata;South_African_Goldmine_Gp(SAGMEG);unclassified	0.0268788	0	0	0.0469613	0	0	0	0	0	0
0.1.6.8.9.2	Archaea;Euryarchaeota;Thermoplasmata;South_African_Goldmine_Gp(SAGMEG);uncultured_archaeon	0.00115383	0	0	0.00138122	0	0	0	0.000187688	0	0
0.1.6.8.9.13	Archaea;Euryarchaeota;Thermoplasmata;South_African_Goldmine_Gp(SAGMEG);uncultured_euryarchaeote	4.9734e-06	0	0	0	0	0	0	0	0	0
0.1.6.8.10.5	Archaea;Euryarchaeota;Thermoplasmata;Thermoplasmatales;AMOS1A-4113-D04	9.94681e-06	0	0.000133981	0	0	0	0	0	0	0
0.1.6.8.10.7	Archaea;Euryarchaeota;Thermoplasmata;Thermoplasmatales;ANT06-05	4.9734e-06	0	0	0	0	0	0	0	0	0
0.1.6.8.10.8	Archaea;Euryarchaeota;Thermoplasmata;Thermoplasmatales;ASC21	0.000952407	0.000603169	0.00120583	0	8.82379e-05	0	0	0.00238067	0	0
0.1.6.8.10.18	Archaea;Euryarchaeota;Thermoplasmata;Thermoplasmatales;Marine_Benthic_Group_D_and_DHVEG-1	2.4867e-06	2.74168e-05	0	0	0	0	0	0	0	0
0.1.6.8.10.19	Archaea;Euryarchaeota;Thermoplasmata;Thermoplasmatales;Marine_Group_II	0.0140126	0.00671711	0.00961313	0.0151934	0.00202947	0	0	0.000592698	0.00199218	0.00117509
0.1.6.8.10.20	Archaea;Euryarchaeota;Thermoplasmata;Thermoplasmatales;Marine_Group_III	2.4867e-06	0	0	0	0	0	0	0	0	0
0.1.6.8.10.22	Archaea;Euryarchaeota;Thermoplasmata;Thermoplasmatales;Terrestrial_Miscellaneous_Gp(TMEG)	0.00397872	0.000137084	0.000267962	0.00138122	0.00632372	0.00869565	0	0.00310179	0	0
0.1.6.8.10.24	Archaea;Euryarchaeota;Thermoplasmata;Thermoplasmatales;Thermoplasmatales_Incertae_Sedis	0.0020018	0.000164501	0.000435438	0	0.000441189	0	0.00374532	0.00153114	0	0
0.1.6.8.10.28	Archaea;Euryarchaeota;Thermoplasmata;Thermoplasmatales;unclassified	0.00188741	0.00128859	0.00234467	0.0138122	0.000205888	0	0	0	4.23868e-05	0
0.1.6.9.1.1	Archaea;Euryarchaeota;unclassified;unclassified;unclassified	0.00178048	0	0	0.0110497	2.94126e-05	0	0.00749064	0.00671724	1.05967e-05	0
0.1.8.1.1.1	Archaea;Marine_Hydrothermal_Vent_Group(MHVG);unclassified;unclassified;unclassified	0.000129309	0.000356418	0.000468933	0	0	0	0	0.000158053	0	0
0.1.8.2.1.1	Archaea;Marine_Hydrothermal_Vent_Group(MHVG);uncultured_archaeon;unclassified;unclassified	0.000121848	0.000438669	0.00110534	0	0	0	0	0	0	0
0.1.11.6.1.1	Archaea;Miscellaneous_Crenarchaeotic_Group;crenarchaeote_enrichment_culture_clone_61-15f;unclassified;unclassified	2.23803e-05	0	0	0	0	0	0	0	0	0
0.1.11.13.1.1	Archaea;Miscellaneous_Crenarchaeotic_Group;unclassified;unclassified;unclassified	0.0101358	0.000438669	3.34952e-05	0.00828729	0.000588253	0	0	0.00046428	5.29835e-05	0.00117509
0.1.11.24.1.1	Archaea;Miscellaneous_Crenarchaeotic_Group;uncultured_archaeon_Arc.201;unclassified;unclassified	9.94681e-06	5.48336e-05	6.69905e-05	0	0	0	0	0	0	0
0.1.11.27.1.1	Archaea;Miscellaneous_Crenarchaeotic_Group;uncultured_bacterium;unclassified;unclassified	4.9734e-06	0	0	0	0	0	0	0	0	0
0.1.11.28.1.1	Archaea;Miscellaneous_Crenarchaeotic_Group;uncultured_crenarchaeote;unclassified;unclassified	0.000285971	0	0	0	0	0	0	0	0	0
0.1.11.33.1.1	Archaea;Miscellaneous_Crenarchaeotic_Group;uncultured_euryarchaeote;unclassified;unclassified	9.94681e-06	0	0	0	0	0	0	0	0	0
0.1.11.38.1.1	Archaea;Miscellaneous_Crenarchaeotic_Group;uncultured_methanogenic_archaeon;unclassified;unclassified	0.00121351	0	0.000100486	0	0.00100003	0	0	0.000493915	0.000635802	0
0.1.11.42.1.1	Archaea;Miscellaneous_Crenarchaeotic_Group;unidentified_archaeon;unclassified;unclassified	0.00069379	0.000109667	0	0	0.00202947	0	0	0.0014126	0	0
0.1.12.1.1.1	Archaea;Miscellaneous_Euryarchaeotic_Group(MEG);unclassified;unclassified;unclassified	0.00498832	0.00553819	0.00572768	0.103591	0.00758846	0	0.011236	0.00566027	0.00582819	0.00705053
0.1.12.3.1.1	Archaea;Miscellaneous_Euryarchaeotic_Group(MEG);uncultured_archaeon;unclassified;unclassified	0.00211618	0.000356418	0.000435438	0.00276243	0.00191182	0	0	0.00146199	0.00630504	0.00352526
0.1.12.6.1.1	Archaea;Miscellaneous_Euryarchaeotic_Group(MEG);uncultured_euryarchaeote_VAL31-1;unclassified;unclassified	0.000144229	8.22504e-05	0.000100486	0	0	0	0	0.000128418	0.000328498	0.00117509
0.1.12.8.1.1	Archaea;Miscellaneous_Euryarchaeotic_Group(MEG);uncultured_euryarchaeote_VAL90;unclassified;unclassified	4.9734e-06	0	0	0	5.88253e-05	0	0	0	0	0
0.1.12.5.1.1	Archaea;Miscellaneous_Euryarchaeotic_Group(MEG);uncultured_euryarchaeote;unclassified;unclassified	0.000902673	0.000438669	0.000301457	0	0.000352952	0	0.00374532	0.00286471	6.35802e-05	0
0.1.15.2.1.1	Archaea;Parvarchaeota;unclassified;unclassified;unclassified	0.00625157	0.00238526	0.00257913	0.0455801	0.00623548	0	0.011236	0.00832741	0.0125783	0.0152761
0.1.15.3.1.1	Archaea;Parvarchaeota;uncultured_archaeon;unclassified;unclassified	0.00384693	0.00076767	0.00150729	0.051105	0.00132357	0	0	0.00810021	0.00548909	0.00235018
0.1.15.4.1.1	Archaea;Parvarchaeota;uncultured_euryarchaeote;unclassified;unclassified	0.0178247	0.00614136	0.010216	0.116022	0.017177	0	0.011236	0.00249921	0.0586633	0.0364277
0.1.16.2.1.1	Archaea;SM1K20;unclassified;unclassified;unclassified	2.4867e-06	0	0	0	0	0	0	0	0	0
0.1.16.3.1.1	Archaea;SM1K20;uncultured_archaeon;unclassified;unclassified	9.94681e-06	0	0	0	0	0	0	0	0	0
0.1.18.2.1.1	Archaea;Thaumarchaeota;AK31;unclassified;unclassified	9.69814e-05	0.000246751	0.000468933	0.00690608	0.000147063	0	0	2.96349e-05	0	0
0.1.18.2.2.1	Archaea;Thaumarchaeota;AK31;uncultured_archaeon;unclassified	0.00070871	0.000932171	0.00314855	0.0248619	0.000647078	0	0	0.000938438	0	0
0.1.18.2.3.1	Archaea;Thaumarchaeota;AK31;uncultured_crenarchaeote;unclassified	2.4867e-06	2.74168e-05	0	0	0	0	0	0	0	0
0.1.18.3.1.1	Archaea;Thaumarchaeota;AK56;unclassified;unclassified	7.46011e-05	0.000219334	0.000569419	0	0	0	0	0	0	0
0.1.18.3.2.1	Archaea;Thaumarchaeota;AK56;uncultured_archaeon;unclassified	3.73005e-05	0.000164501	0.000301457	0	0	0	0	0	0	0
0.1.18.3.3.1	Archaea;Thaumarchaeota;AK56;uncultured_bacterium;unclassified	0.000358085	0.00159017	0.00187573	0	0	0	0	1.97566e-05	0	0
0.1.18.4.2.1	Archaea;Thaumarchaeota;AK59;unclassified;unclassified	2.4867e-06	2.74168e-05	0	0	0	0	0	0	0	0
0.1.18.12.1.1	Archaea;Thaumarchaeota;Group_C3;unclassified;unclassified	2.73537e-05	0	0	0	0.000117651	0	0	0	0	0
0.1.18.12.3.1	Archaea;Thaumarchaeota;Group_C3;uncultured_crenarchaeote;unclassified	1.74069e-05	0	0	0	0	0	0	0	0	0
0.1.18.13.2.1	Archaea;Thaumarchaeota;HDBA-SITS389;uncultured_archaeon;unclassified	0.00135277	0.00430444	0.00659856	0	0.00129416	0	0	5.92698e-05	0.000890123	0.00235018
0.1.18.15.2.1	Archaea;Thaumarchaeota;Marine_Benthic_Group_A;unclassified;unclassified	2.4867e-06	0	3.34952e-05	0	0	0	0	0	0	0
0.1.18.15.4.1	Archaea;Thaumarchaeota;Marine_Benthic_Group_A;uncultured_archaeon;unclassified	2.4867e-06	2.74168e-05	0	0	0	0	0	0	0	0
0.1.18.16.1.1	Archaea;Thaumarchaeota;Marine_Benthic_Group_B;unclassified;unclassified	6.21676e-05	0	0	0	2.94126e-05	0	0	0.000128418	0	0
0.1.18.16.3.1	Archaea;Thaumarchaeota;Marine_Benthic_Group_B;uncultured_archaeon;unclassified	2.4867e-06	0	0	0	0	0	0	0	0	0
0.1.18.16.13.1	Archaea;Thaumarchaeota;Marine_Benthic_Group_B;uncultured_marine_archaeon;unclassified	1.74069e-05	0	0	0	8.82379e-05	0	0	0	0	0
0.1.18.17.4.1	Archaea;Thaumarchaeota;Marine_Group_I;Thaumarchaeota_archaeon_MY2;unclassified	0.010837	0.016313	0.0131971	0	0.0341187	0	0.00374532	0.00011854	0.0219034	0.0117509
0.1.18.17.10.1	Archaea;Thaumarchaeota;Marine_Group_I;unclassified;unclassified	0.0282067	0.0616329	0.0481326	0	0.0719139	0.0521739	0.00749064	0.000158053	0.0411046	0.0293772
0.1.18.17.13.1	Archaea;Thaumarchaeota;Marine_Group_I;uncultured_archaeon;unclassified	0.00888001	0.0509678	0.034969	0	0.00776493	0	0.00374532	0.000918682	0.000837139	0
0.1.18.17.24.1	Archaea;Thaumarchaeota;Marine_Group_I;uncultured_bacterium;unclassified	2.4867e-06	2.74168e-05	0	0	0	0	0	0	0	0
0.1.18.17.12.1	Archaea;Thaumarchaeota;Marine_Group_I;uncultured_Nitrosopumilales_archaeon;unclassified	4.9734e-06	5.48336e-05	0	0	0	0	0	0	0	0
0.1.18.17.53.1	Archaea;Thaumarchaeota;Marine_Group_I;uncultured_sediment_archaeon;unclassified	9.94681e-06	0	0	0	0	0	0	0	0	0
0.1.18.17.54.1	Archaea;Thaumarchaeota;Marine_Group_I;uncultured_sponge_symbiont_PAAR9;unclassified	2.4867e-06	0	0	0	0	0	0	0	0	0
0.1.18.17.55.1	Archaea;Thaumarchaeota;Marine_Group_I;uncultured_thaumarchaeote;unclassified	2.4867e-06	0	0	0	0	0	0	0	0	0
0.1.18.17.7.1	Archaea;Thaumarchaeota;Marine_Group_I;Unknown_Order;Unknown_Family	0.345841	0.611038	0.634132	0	0.713256	0.226087	0.0561798	0.00709262	0.71959	0.509988
0.1.18.31.2.1	Archaea;Thaumarchaeota;pSL12;uncultured_archaeon;unclassified	1.98936e-05	5.48336e-05	0	0	0	0	0	0	0	0
0.1.18.24.1.1	Archaea;Thaumarchaeota;Sc-EA05;unclassified;unclassified	2.4867e-06	2.74168e-05	0	0	0	0	0	0	0	0
0.1.18.24.2.1	Archaea;Thaumarchaeota;Sc-EA05;uncultured_archaeon;unclassified	1.74069e-05	5.48336e-05	6.69905e-05	0	0	0	0	0	2.11934e-05	0.00117509
0.1.18.21.1.1	Archaea;Thaumarchaeota;SIGW1085;unclassified;unclassified	2.4867e-06	0	0	0	0	0	0	0	0	0
0.1.18.21.2.1	Archaea;Thaumarchaeota;SIGW1085;uncultured_bacterium;unclassified	7.46011e-06	0	0	0	0	0	0	0	0	0
0.1.18.22.2.1	Archaea;Thaumarchaeota;SIGW396;uncultured_bacterium;unclassified	2.4867e-06	0	3.34952e-05	0	0	0	0	0	0	0
0.1.18.23.1.1	Archaea;Thaumarchaeota;SIGW621;unclassified;unclassified	3.48138e-05	0	3.34952e-05	0	0	0	0	0	1.05967e-05	0
0.1.18.23.3.1	Archaea;Thaumarchaeota;SIGW621;uncultured_bacterium;unclassified	0.000111902	8.22504e-05	0.000401943	0	0	0	0	0	1.05967e-05	0
0.1.18.25.1.1	Archaea;Thaumarchaeota;Soil_Crenarchaeotic_Group(SCG);Crenarchaeota;unclassified	2.4867e-06	0	0	0	0	0	0	0	0	0
0.1.18.25.10.1	Archaea;Thaumarchaeota;Soil_Crenarchaeotic_Group(SCG);unclassified;unclassified	0.0630056	0.00715578	0.0334282	0	0.00170593	0.026087	0	0.00034574	0.00925092	0.00940071
0.1.18.25.13.1	Archaea;Thaumarchaeota;Soil_Crenarchaeotic_Group(SCG);uncultured_archaeon;unclassified	0.00126324	0.000137084	0.000401943	0	0	0	0.00374532	9.8783e-06	0	0
0.1.18.25.14.1	Archaea;Thaumarchaeota;Soil_Crenarchaeotic_Group(SCG);uncultured_bacterium;unclassified	0.000179043	2.74168e-05	0.000100486	0	0	0	0	0	1.05967e-05	0
0.1.18.25.15.1	Archaea;Thaumarchaeota;Soil_Crenarchaeotic_Group(SCG);uncultured_compost_archaeon;unclassified	0.000188989	2.74168e-05	0.00247865	0	0	0	0	0	0	0
0.1.18.25.17.1	Archaea;Thaumarchaeota;Soil_Crenarchaeotic_Group(SCG);uncultured_crenarchaeote_TRC132-9;unclassified	0.00112896	0	0	0	0	0	0	0	0	0
0.1.18.25.18.1	Archaea;Thaumarchaeota;Soil_Crenarchaeotic_Group(SCG);uncultured_crenarchaeote_TRC23-10;unclassified	0.000184016	2.74168e-05	0.000133981	0	0	0	0	0	0	0
0.1.18.25.16.1	Archaea;Thaumarchaeota;Soil_Crenarchaeotic_Group(SCG);uncultured_crenarchaeote;unclassified	0.00228528	2.74168e-05	0.000401943	0	0	0	0	0	2.11934e-05	0
0.1.18.25.22.1	Archaea;Thaumarchaeota;Soil_Crenarchaeotic_Group(SCG);uncultured_euryarchaeote;unclassified	0.00272045	0.000904754	0.00368447	0	0.000294126	0	0	0	0	0
0.1.18.25.24.1	Archaea;Thaumarchaeota;Soil_Crenarchaeotic_Group(SCG);uncultured_soil_archaeon;unclassified	3.73005e-05	0	0	0	0	0	0	0	0	0
0.1.18.25.25.1	Archaea;Thaumarchaeota;Soil_Crenarchaeotic_Group(SCG);uncultured_thaumarchaeote;unclassified	2.4867e-06	0	0	0	0	0	0	0	0	0
0.1.18.25.27.1	Archaea;Thaumarchaeota;Soil_Crenarchaeotic_Group(SCG);unidentified_archaeon_SCA1150;unclassified	1.24335e-05	0	0	0	0	0	0	0	4.23868e-05	0
0.1.18.25.29.1	Archaea;Thaumarchaeota;Soil_Crenarchaeotic_Group(SCG);unidentified_archaeon_SCA1154;unclassified	9.94681e-06	2.74168e-05	0	0	0	0	0	0	0	0
0.1.18.25.32.1	Archaea;Thaumarchaeota;Soil_Crenarchaeotic_Group(SCG);unidentified_archaeon_SCA1173;unclassified	3.23271e-05	0	0	0	0	0	0	0	0	0
0.1.18.25.26.1	Archaea;Thaumarchaeota;Soil_Crenarchaeotic_Group(SCG);unidentified_archaeon;unclassified	1.74069e-05	0	0	0	0	0	0	0	0	0
0.1.18.25.9.1	Archaea;Thaumarchaeota;Soil_Crenarchaeotic_Group(SCG);Unknown_Order;Unknown_Family	0.00556773	0.00318035	0.00532574	0.00552486	0.00429424	0	0.00374532	0.00287459	0.0105331	0.00470035
0.1.18.26.2.1	Archaea;Thaumarchaeota;South_African_Gold_Mine_Gp_1(SAGMCG-1);unclassified;unclassified	6.7141e-05	0.000164501	3.34952e-05	0	5.88253e-05	0	0	0	1.05967e-05	0
0.1.18.26.4.1	Archaea;Thaumarchaeota;South_African_Gold_Mine_Gp_1(SAGMCG-1);uncultured_archaeon;unclassified	0.00532403	0.0145857	0.0216714	0	0.00611783	0	0	0.000158053	0.00711039	0
0.1.18.26.1.1	Archaea;Thaumarchaeota;South_African_Gold_Mine_Gp_1(SAGMCG-1);Unknown_Order;Unknown_Family	0.000432686	0	3.34952e-05	0	0	0	0	0	0.000413271	0
0.1.18.32.1.1	Archaea;Thaumarchaeota;terrestrial_group;unclassified;unclassified	0.000213856	0.000493502	0.000971362	0	0	0	0	0.000207444	0	0
0.1.18.32.4.1	Archaea;Thaumarchaeota;terrestrial_group;uncultured_thaumarchaeote;unclassified	9.94681e-06	8.22504e-05	0	0	0	0	0	0	0	0
0.1.18.33.1.1	Archaea;Thaumarchaeota;unclassified;unclassified;unclassified	0.0412345	0.0351209	0.062837	0.00138122	0.0167946	0.00869565	0	0.00166943	0.0184065	0.027027
0.1.21.1.1.1	Archaea;unclassified;unclassified;unclassified;unclassified	0.00859902	0.00882821	0.00646458	0.0814917	0.006059	0	0.0224719	0.0169018	0.00685607	0.0105758
0.1.23.1.1.1	Archaea;uncultured_archeon_'KTK_28A';unclassified;unclassified;unclassified	2.4867e-06	0	0	0	0	0	0	0	0	0
0.1.19.9.1.1	Archaea;Woesearchaeota_(DHVEG-6);archaeon_GW2011_AR18;unclassified;unclassified	0.00102701	0.00238526	0.00113884	0	0.00170593	0	0	0.000148174	0.00198158	0.00117509
0.1.19.3.1.1	Archaea;Woesearchaeota_(DHVEG-6);Nanoarchaeota_archaeon_SCGC_AAA011-K22;unclassified;unclassified	0.000186503	0.00148051	0.000669905	0	2.94126e-05	0	0	0	0	0
0.1.19.12.1.1	Archaea;Woesearchaeota_(DHVEG-6);unclassified;unclassified;unclassified	0.013923	0.0457312	0.0179869	0.0801105	0.0271773	0	0.00374532	0.00566027	0.0146023	0.00705053
0.1.19.13.1.1	Archaea;Woesearchaeota_(DHVEG-6);uncultured_archaeon;unclassified;unclassified	5.22207e-05	2.74168e-05	0	0	5.88253e-05	0	0	0	0.000190741	0
0.1.19.24.1.1	Archaea;Woesearchaeota_(DHVEG-6);uncultured_euryarchaeote;unclassified;unclassified	0.00197195	0.00965071	0.00274661	0	0.00308833	0	0	0.000721116	0.00090072	0
0.3.1.1.1.1	unknown;unclassified;unclassified;unclassified;unclassified	0.00172577	0.000274168	0.000502428	0.019337	0.00176476	0	0	0.00260787	0.00120802	0

## Sheet: raw counts
mothur rankID	Archaeal family	All samples	BR2-river-2012a	BR2-river-2012b	GOR34-spring1-2011	GOR34-river-2012a	GOR34-river-2012b	GOR34-spring1-2013a	GOR34-spring1-2013b	GOR34-river-2013a	GOR34-river-2013b
0	All families	402139	36474	29855	724	33999	115	267	101232	94369	851
0.1.18.17.7.1	Archaea;Thaumarchaeota;Marine_Group_I;Unknown_Order;Unknown_Family	139076	22287	18932	0	24250	26	15	718	67907	434
0.1.6.3.1.1	Archaea;Euryarchaeota;Methanobacteria;Methanobacteriales;Methanobacteriaceae	107651	22	26	210	24	43	189	89407	127	77
0.1.18.25.10.1	Archaea;Thaumarchaeota;Soil_Crenarchaeotic_Group(SCG);unclassified;unclassified	25337	261	998	0	58	3	0	35	873	8
0.1.18.33.1.1	Archaea;Thaumarchaeota;unclassified;unclassified;unclassified	16582	1281	1876	1	571	1	0	169	1737	23
0.1.18.17.10.1	Archaea;Thaumarchaeota;Marine_Group_I;unclassified;unclassified	11343	2248	1437	0	2445	6	2	16	3879	25
0.1.6.8.9.1	Archaea;Euryarchaeota;Thermoplasmata;South_African_Goldmine_Gp(SAGMEG);unclassified	10809	0	0	34	0	0	0	0	0	0
0.1.6.5.4.2	Archaea;Euryarchaeota;Methanomicrobia;Methanocellales;Methanocellaceae	7263	0	0	0	0	0	0	0	27	0
0.1.15.4.1.1	Archaea;Parvarchaeota;uncultured_euryarchaeote;unclassified;unclassified	7168	224	305	84	584	0	3	253	5536	31
0.1.6.8.10.19	Archaea;Euryarchaeota;Thermoplasmata;Thermoplasmatales;Marine_Group_II	5635	245	287	11	69	0	0	60	188	1
0.1.1.2.7.1	Archaea;Aenigmarchaeota;Deep_Sea_Euryarchaeotic_Group(DSEG);uncultured_archaeon;unclassified	5610	2009	984	1	150	0	1	426	1333	12
0.1.19.12.1.1	Archaea;Woesearchaeota_(DHVEG-6);unclassified;unclassified;unclassified	5599	1668	537	58	924	0	1	573	1378	6
0.1.6.5.6.5	Archaea;Euryarchaeota;Methanomicrobia;Methanosarcinales;Methanosaetaceae	5286	13	20	0	626	1	2	1200	129	0
0.1.1.2.4.1	Archaea;Aenigmarchaeota;Deep_Sea_Euryarchaeotic_Group(DSEG);unclassified;unclassified	4667	872	298	19	278	0	4	709	2267	18
0.1.18.17.4.1	Archaea;Thaumarchaeota;Marine_Group_I;Thaumarchaeota_archaeon_MY2;unclassified	4358	595	394	0	1160	0	1	12	2067	10
0.1.11.13.1.1	Archaea;Miscellaneous_Crenarchaeotic_Group;unclassified;unclassified;unclassified	4076	16	1	6	20	0	0	47	5	1
0.1.18.17.13.1	Archaea;Thaumarchaeota;Marine_Group_I;uncultured_archaeon;unclassified	3571	1859	1044	0	264	0	1	93	79	0
0.1.21.1.1.1	Archaea;unclassified;unclassified;unclassified;unclassified	3458	322	193	59	206	0	6	1711	647	9
0.1.6.5.5.9	Archaea;Euryarchaeota;Methanomicrobia;Methanomicrobiales;Methanoregulaceae	2706	6	8	0	284	0	0	31	19	0
0.1.15.2.1.1	Archaea;Parvarchaeota;unclassified;unclassified;unclassified	2514	87	77	33	212	0	3	843	1187	13
0.1.18.25.9.1	Archaea;Thaumarchaeota;Soil_Crenarchaeotic_Group(SCG);Unknown_Order;Unknown_Family	2239	116	159	4	146	0	1	291	994	4
0.1.18.26.4.1	Archaea;Thaumarchaeota;South_African_Gold_Mine_Gp_1(SAGMCG-1);uncultured_archaeon;unclassified	2141	532	647	0	208	0	0	16	671	0
0.1.12.1.1.1	Archaea;Miscellaneous_Euryarchaeotic_Group(MEG);unclassified;unclassified;unclassified	2006	202	171	75	258	0	3	573	550	6
0.1.6.5.6.6	Archaea;Euryarchaeota;Methanomicrobia;Methanosarcinales;Methanosarcinaceae	1996	7	17	0	46	26	27	119	96	159
0.1.6.8.10.22	Archaea;Euryarchaeota;Thermoplasmata;Thermoplasmatales;Terrestrial_Miscellaneous_Gp(TMEG)	1600	5	8	1	215	1	0	314	0	0
0.1.15.3.1.1	Archaea;Parvarchaeota;uncultured_archaeon;unclassified;unclassified	1547	28	45	37	45	0	0	820	518	2
0.1.6.5.5.10	Archaea;Euryarchaeota;Methanomicrobia;Methanomicrobiales;Methanospirillaceae	1533	6	4	0	67	3	0	0	21	0
0.1.5.1.1.1	Archaea;Diapherotrites;Diapherotrites_Incertae_Sedis;Unknown_Order;Unknown_Family	1209	298	130	12	127	0	1	136	330	0
0.1.18.25.22.1	Archaea;Thaumarchaeota;Soil_Crenarchaeotic_Group(SCG);uncultured_euryarchaeote;unclassified	1094	33	110	0	10	0	0	0	0	0
0.1.18.25.16.1	Archaea;Thaumarchaeota;Soil_Crenarchaeotic_Group(SCG);uncultured_crenarchaeote;unclassified	919	1	12	0	0	0	0	0	2	0
0.1.12.3.1.1	Archaea;Miscellaneous_Euryarchaeotic_Group(MEG);uncultured_archaeon;unclassified;unclassified	851	13	13	2	65	0	0	148	595	3
0.1.6.8.10.24	Archaea;Euryarchaeota;Thermoplasmata;Thermoplasmatales;Thermoplasmatales_Incertae_Sedis	805	6	13	0	15	0	1	155	0	0
0.1.19.24.1.1	Archaea;Woesearchaeota_(DHVEG-6);uncultured_euryarchaeote;unclassified;unclassified	793	352	82	0	105	0	0	73	85	0
0.1.6.8.10.28	Archaea;Euryarchaeota;Thermoplasmata;Thermoplasmatales;unclassified	759	47	70	10	7	0	0	0	4	0
0.1.6.9.1.1	Archaea;Euryarchaeota;unclassified;unclassified;unclassified	716	0	0	8	1	0	2	680	1	0
0.3.1.1.1.1	unknown;unclassified;unclassified;unclassified;unclassified	694	10	15	14	60	0	0	264	114	0
0.1.5.3.1.1	Archaea;Diapherotrites;uncultured_archaeon;unclassified;unclassified	603	3	0	0	187	0	0	1	384	3
0.1.6.5.5.6	Archaea;Euryarchaeota;Methanomicrobia;Methanomicrobiales;Methanocorpusculaceae	589	0	0	0	4	0	0	0	0	0
0.1.1.3.1.1	Archaea;Aenigmarchaeota;unclassified;unclassified;unclassified	575	55	36	5	6	0	0	325	117	1
0.1.18.13.2.1	Archaea;Thaumarchaeota;HDBA-SITS389;uncultured_archaeon;unclassified	544	157	197	0	44	0	0	6	84	2
0.1.18.25.13.1	Archaea;Thaumarchaeota;Soil_Crenarchaeotic_Group(SCG);uncultured_archaeon;unclassified	508	5	12	0	0	0	1	1	0	0
0.1.11.38.1.1	Archaea;Miscellaneous_Crenarchaeotic_Group;uncultured_methanogenic_archaeon;unclassified;unclassified	488	0	3	0	34	0	0	50	60	0
0.1.6.8.9.2	Archaea;Euryarchaeota;Thermoplasmata;South_African_Goldmine_Gp(SAGMEG);uncultured_archaeon	464	0	0	1	0	0	0	19	0	0
0.1.18.25.17.1	Archaea;Thaumarchaeota;Soil_Crenarchaeotic_Group(SCG);uncultured_crenarchaeote_TRC132-9;unclassified	454	0	0	0	0	0	0	0	0	0
0.1.19.9.1.1	Archaea;Woesearchaeota_(DHVEG-6);archaeon_GW2011_AR18;unclassified;unclassified	413	87	34	0	58	0	0	15	187	1
0.1.6.8.10.8	Archaea;Euryarchaeota;Thermoplasmata;Thermoplasmatales;ASC21	383	22	36	0	3	0	0	241	0	0
0.1.6.5.6.3	Archaea;Euryarchaeota;Methanomicrobia;Methanosarcinales;GOM_Arc_I	377	74	145	16	6	0	0	0	0	0
0.1.12.5.1.1	Archaea;Miscellaneous_Euryarchaeotic_Group(MEG);uncultured_euryarchaeote;unclassified;unclassified	363	16	9	0	12	0	1	290	6	0
0.1.18.2.2.1	Archaea;Thaumarchaeota;AK31;uncultured_archaeon;unclassified	285	34	94	18	22	0	0	95	0	0
0.1.11.42.1.1	Archaea;Miscellaneous_Crenarchaeotic_Group;unidentified_archaeon;unclassified;unclassified	279	4	0	0	69	0	0	143	0	0
0.1.18.26.1.1	Archaea;Thaumarchaeota;South_African_Gold_Mine_Gp_1(SAGMCG-1);Unknown_Order;Unknown_Family	174	0	1	0	0	0	0	0	39	0
0.1.18.3.3.1	Archaea;Thaumarchaeota;AK56;uncultured_bacterium;unclassified	144	58	56	0	0	0	0	2	0	0
0.1.6.5.5.14	Archaea;Euryarchaeota;Methanomicrobia;Methanomicrobiales;unclassified	136	0	0	0	0	0	0	1	0	0
0.1.6.2.1.1	Archaea;Euryarchaeota;Halobacteria;Halobacteriales;Halobacteriaceae	129	2	12	0	3	0	0	0	0	0
0.1.1.2.2.1	Archaea;Aenigmarchaeota;Deep_Sea_Euryarchaeotic_Group(DSEG);archaeon_GW2011_AR5;unclassified	121	61	33	0	3	0	0	9	2	0
0.1.11.28.1.1	Archaea;Miscellaneous_Crenarchaeotic_Group;uncultured_crenarchaeote;unclassified;unclassified	115	0	0	0	0	0	0	0	0	0
0.1.6.5.4.5	Archaea;Euryarchaeota;Methanomicrobia;Methanocellales;uncultured_archaeon	112	0	0	0	0	0	0	0	27	0
0.1.1.1.1.1	Archaea;Aenigmarchaeota;Aenigmarchaeota_Incertae_Sedis;Unknown_Order;Unknown_Family	104	47	18	0	3	0	0	8	0	0
0.1.1.2.9.1	Archaea;Aenigmarchaeota;Deep_Sea_Euryarchaeotic_Group(DSEG);uncultured_archaeon_pPCA7.17;unclassified	86	8	4	0	5	0	0	0	32	0
0.1.18.32.1.1	Archaea;Thaumarchaeota;terrestrial_group;unclassified;unclassified	86	18	29	0	0	0	0	21	0	0
0.1.6.8.8.7	Archaea;Euryarchaeota;Thermoplasmata;Marine_Benthic_Group_E;uncultured_euryarchaeote	76	2	2	0	16	0	0	56	0	0
0.1.18.25.15.1	Archaea;Thaumarchaeota;Soil_Crenarchaeotic_Group(SCG);uncultured_compost_archaeon;unclassified	76	1	74	0	0	0	0	0	0	0
0.1.19.3.1.1	Archaea;Woesearchaeota_(DHVEG-6);Nanoarchaeota_archaeon_SCGC_AAA011-K22;unclassified;unclassified	75	54	20	0	1	0	0	0	0	0
0.1.18.25.18.1	Archaea;Thaumarchaeota;Soil_Crenarchaeotic_Group(SCG);uncultured_crenarchaeote_TRC23-10;unclassified	74	1	4	0	0	0	0	0	0	0
0.1.18.25.14.1	Archaea;Thaumarchaeota;Soil_Crenarchaeotic_Group(SCG);uncultured_bacterium;unclassified	72	1	3	0	0	0	0	0	1	0
0.1.12.6.1.1	Archaea;Miscellaneous_Euryarchaeotic_Group(MEG);uncultured_euryarchaeote_VAL31-1;unclassified;unclassified	58	3	3	0	0	0	0	13	31	1
0.1.8.1.1.1	Archaea;Marine_Hydrothermal_Vent_Group(MHVG);unclassified;unclassified;unclassified	52	13	14	0	0	0	0	16	0	0
0.1.8.2.1.1	Archaea;Marine_Hydrothermal_Vent_Group(MHVG);uncultured_archaeon;unclassified;unclassified	49	16	33	0	0	0	0	0	0	0
0.1.18.23.3.1	Archaea;Thaumarchaeota;SIGW621;uncultured_bacterium;unclassified	45	3	12	0	0	0	0	0	1	0
0.1.18.2.1.1	Archaea;Thaumarchaeota;AK31;unclassified;unclassified	39	9	14	5	5	0	0	3	0	0
0.1.18.3.1.1	Archaea;Thaumarchaeota;AK56;unclassified;unclassified	30	8	17	0	0	0	0	0	0	0
0.1.5.2.1.1	Archaea;Diapherotrites;unclassified;unclassified;unclassified	28	7	0	0	3	0	0	6	6	0
0.1.18.26.2.1	Archaea;Thaumarchaeota;South_African_Gold_Mine_Gp_1(SAGMCG-1);unclassified;unclassified	27	6	1	0	2	0	0	0	1	0
0.1.18.16.1.1	Archaea;Thaumarchaeota;Marine_Benthic_Group_B;unclassified;unclassified	25	0	0	0	1	0	0	13	0	0
0.1.19.13.1.1	Archaea;Woesearchaeota_(DHVEG-6);uncultured_archaeon;unclassified;unclassified	21	1	0	0	2	0	0	0	18	0
0.1.18.3.2.1	Archaea;Thaumarchaeota;AK56;uncultured_archaeon;unclassified	15	6	9	0	0	0	0	0	0	0
0.1.18.25.24.1	Archaea;Thaumarchaeota;Soil_Crenarchaeotic_Group(SCG);uncultured_soil_archaeon;unclassified	15	0	0	0	0	0	0	0	0	0
0.1.18.23.1.1	Archaea;Thaumarchaeota;SIGW621;unclassified;unclassified	14	0	1	0	0	0	0	0	1	0
0.1.18.25.32.1	Archaea;Thaumarchaeota;Soil_Crenarchaeotic_Group(SCG);unidentified_archaeon_SCA1173;unclassified	13	0	0	0	0	0	0	0	0	0
0.1.6.8.8.2	Archaea;Euryarchaeota;Thermoplasmata;Marine_Benthic_Group_E;uncultured_archaeon	12	0	3	0	0	0	0	0	0	0
0.1.18.12.1.1	Archaea;Thaumarchaeota;Group_C3;unclassified;unclassified	11	0	0	0	4	0	0	0	0	0
0.1.1.2.3.1	Archaea;Aenigmarchaeota;Deep_Sea_Euryarchaeotic_Group(DSEG);hypersaline_lake_metagenome;unclassified	10	0	0	0	0	0	0	0	0	0
0.1.6.8.7.2	Archaea;Euryarchaeota;Thermoplasmata;MSBL1;unclassified	10	0	0	0	0	0	0	0	0	0
0.1.6.8.7.4	Archaea;Euryarchaeota;Thermoplasmata;MSBL1;uncultured_candidate_division_MSBL1_archaeon	10	0	0	0	0	0	0	0	0	0
0.1.11.6.1.1	Archaea;Miscellaneous_Crenarchaeotic_Group;crenarchaeote_enrichment_culture_clone_61-15f;unclassified;unclassified	9	0	0	0	0	0	0	0	0	0
0.1.18.31.2.1	Archaea;Thaumarchaeota;pSL12;uncultured_archaeon;unclassified	8	2	0	0	0	0	0	0	0	0
0.1.1.2.5.1	Archaea;Aenigmarchaeota;Deep_Sea_Euryarchaeotic_Group(DSEG);uncultured_Methanobacteriaceae_archaeon;unclassified	7	1	1	0	0	0	0	1	0	0
0.1.18.12.3.1	Archaea;Thaumarchaeota;Group_C3;uncultured_crenarchaeote;unclassified	7	0	0	0	0	0	0	0	0	0
0.1.18.16.13.1	Archaea;Thaumarchaeota;Marine_Benthic_Group_B;uncultured_marine_archaeon;unclassified	7	0	0	0	3	0	0	0	0	0
0.1.18.24.2.1	Archaea;Thaumarchaeota;Sc-EA05;uncultured_archaeon;unclassified	7	2	2	0	0	0	0	0	2	1
0.1.18.25.26.1	Archaea;Thaumarchaeota;Soil_Crenarchaeotic_Group(SCG);unidentified_archaeon;unclassified	7	0	0	0	0	0	0	0	0	0
0.1.1.2.12.1	Archaea;Aenigmarchaeota;Deep_Sea_Euryarchaeotic_Group(DSEG);uncultured_sediment_archaeon;unclassified	5	2	2	0	0	0	0	0	0	0
0.1.18.25.27.1	Archaea;Thaumarchaeota;Soil_Crenarchaeotic_Group(SCG);unidentified_archaeon_SCA1150;unclassified	5	0	0	0	0	0	0	0	4	0
0.1.6.5.2.2	Archaea;Euryarchaeota;Methanomicrobia;ANME-1;ANME-1b	4	0	0	0	0	3	0	1	0	0
0.1.6.5.5.5	Archaea;Euryarchaeota;Methanomicrobia;Methanomicrobiales;MHLsu47-B8A	4	0	0	0	0	0	0	4	0	0
0.1.6.8.10.5	Archaea;Euryarchaeota;Thermoplasmata;Thermoplasmatales;AMOS1A-4113-D04	4	0	4	0	0	0	0	0	0	0
0.1.11.24.1.1	Archaea;Miscellaneous_Crenarchaeotic_Group;uncultured_archaeon_Arc.201;unclassified;unclassified	4	2	2	0	0	0	0	0	0	0
0.1.11.33.1.1	Archaea;Miscellaneous_Crenarchaeotic_Group;uncultured_euryarchaeote;unclassified;unclassified	4	0	0	0	0	0	0	0	0	0
0.1.16.3.1.1	Archaea;SM1K20;uncultured_archaeon;unclassified;unclassified	4	0	0	0	0	0	0	0	0	0
0.1.18.17.53.1	Archaea;Thaumarchaeota;Marine_Group_I;uncultured_sediment_archaeon;unclassified	4	0	0	0	0	0	0	0	0	0
0.1.18.25.29.1	Archaea;Thaumarchaeota;Soil_Crenarchaeotic_Group(SCG);unidentified_archaeon_SCA1154;unclassified	4	1	0	0	0	0	0	0	0	0
0.1.18.32.4.1	Archaea;Thaumarchaeota;terrestrial_group;uncultured_thaumarchaeote;unclassified	4	3	0	0	0	0	0	0	0	0
0.1.6.5.6.7	Archaea;Euryarchaeota;Methanomicrobia;Methanosarcinales;Methermicoccaceae	3	0	0	0	0	2	1	0	0	0
0.1.6.8.7.3	Archaea;Euryarchaeota;Thermoplasmata;MSBL1;uncultured_archaeon	3	0	0	0	0	0	0	0	0	0
0.1.18.21.2.1	Archaea;Thaumarchaeota;SIGW1085;uncultured_bacterium;unclassified	3	0	0	0	0	0	0	0	0	0
0.1.6.8.9.13	Archaea;Euryarchaeota;Thermoplasmata;South_African_Goldmine_Gp(SAGMEG);uncultured_euryarchaeote	2	0	0	0	0	0	0	0	0	0
0.1.6.8.10.7	Archaea;Euryarchaeota;Thermoplasmata;Thermoplasmatales;ANT06-05	2	0	0	0	0	0	0	0	0	0
0.1.11.27.1.1	Archaea;Miscellaneous_Crenarchaeotic_Group;uncultured_bacterium;unclassified;unclassified	2	0	0	0	0	0	0	0	0	0
0.1.12.8.1.1	Archaea;Miscellaneous_Euryarchaeotic_Group(MEG);uncultured_euryarchaeote_VAL90;unclassified;unclassified	2	0	0	0	2	0	0	0	0	0
0.1.18.17.12.1	Archaea;Thaumarchaeota;Marine_Group_I;uncultured_Nitrosopumilales_archaeon;unclassified	2	2	0	0	0	0	0	0	0	0
0.1.6.5.1.3	Archaea;Euryarchaeota;Methanomicrobia;AK5;uncultured_archaeon	1	0	0	0	1	0	0	0	0	0
0.1.6.5.1.2	Archaea;Euryarchaeota;Methanomicrobia;AK5;uncultured_Methanomicrobia_archaeon	1	0	0	0	0	0	0	0	0	0
0.1.6.5.2.1	Archaea;Euryarchaeota;Methanomicrobia;ANME-1;ANME-1a	1	0	0	0	0	0	1	0	0	0
0.1.6.5.5.11	Archaea;Euryarchaeota;Methanomicrobia;Methanomicrobiales;Rice_Cluster_II	1	0	0	0	0	0	0	0	0	0
0.1.6.5.7.4	Archaea;Euryarchaeota;Methanomicrobia;ST-12K10A;uncultured_euryarchaeote	1	0	0	0	0	0	0	0	0	0
0.1.6.8.10.18	Archaea;Euryarchaeota;Thermoplasmata;Thermoplasmatales;Marine_Benthic_Group_D_and_DHVEG-1	1	1	0	0	0	0	0	0	0	0
0.1.6.8.10.20	Archaea;Euryarchaeota;Thermoplasmata;Thermoplasmatales;Marine_Group_III	1	0	0	0	0	0	0	0	0	0
0.1.16.2.1.1	Archaea;SM1K20;unclassified;unclassified;unclassified	1	0	0	0	0	0	0	0	0	0
0.1.18.2.3.1	Archaea;Thaumarchaeota;AK31;uncultured_crenarchaeote;unclassified	1	1	0	0	0	0	0	0	0	0
0.1.18.4.2.1	Archaea;Thaumarchaeota;AK59;unclassified;unclassified	1	1	0	0	0	0	0	0	0	0
0.1.18.15.2.1	Archaea;Thaumarchaeota;Marine_Benthic_Group_A;unclassified;unclassified	1	0	1	0	0	0	0	0	0	0
0.1.18.15.4.1	Archaea;Thaumarchaeota;Marine_Benthic_Group_A;uncultured_archaeon;unclassified	1	1	0	0	0	0	0	0	0	0
0.1.18.16.3.1	Archaea;Thaumarchaeota;Marine_Benthic_Group_B;uncultured_archaeon;unclassified	1	0	0	0	0	0	0	0	0	0
0.1.18.17.24.1	Archaea;Thaumarchaeota;Marine_Group_I;uncultured_bacterium;unclassified	1	1	0	0	0	0	0	0	0	0
0.1.18.17.54.1	Archaea;Thaumarchaeota;Marine_Group_I;uncultured_sponge_symbiont_PAAR9;unclassified	1	0	0	0	0	0	0	0	0	0
0.1.18.17.55.1	Archaea;Thaumarchaeota;Marine_Group_I;uncultured_thaumarchaeote;unclassified	1	0	0	0	0	0	0	0	0	0
0.1.18.24.1.1	Archaea;Thaumarchaeota;Sc-EA05;unclassified;unclassified	1	1	0	0	0	0	0	0	0	0
0.1.18.21.1.1	Archaea;Thaumarchaeota;SIGW1085;unclassified;unclassified	1	0	0	0	0	0	0	0	0	0
0.1.18.22.2.1	Archaea;Thaumarchaeota;SIGW396;uncultured_bacterium;unclassified	1	0	1	0	0	0	0	0	0	0
0.1.18.25.1.1	Archaea;Thaumarchaeota;Soil_Crenarchaeotic_Group(SCG);Crenarchaeota;unclassified	1	0	0	0	0	0	0	0	0	0
0.1.18.25.25.1	Archaea;Thaumarchaeota;Soil_Crenarchaeotic_Group(SCG);uncultured_thaumarchaeote;unclassified	1	0	0	0	0	0	0	0	0	0
0.1.23.1.1.1	Archaea;uncultured_archeon_'KTK_28A';unclassified;unclassified;unclassified	1	0	0	0	0	0	0	0	0	0
