# Supplementary material for: Metagenomic identification of active methanogens and methanotrophs in serpentinite springs of the Voltri Massif, Italy
Source: PeerJ. 2017 Jan 26;5:e2945. doi: 10.7717/peerj.2945 (PMC5274519; doi:10.7717/peerj.2945)
Supplement: File S5 [file peerj-05-2945-s005.xlsx]

## Sheet: percent order
Order	All Samples	BR2-river-2012a	BR2-river-2013	BR2-spring-2012	BR2-spring-2013	GOR34-river-2012a	GOR34-river-2013b	GOR34-spring1-2013b	GOR34-spring3-2012
All Orders	1.28731e+06	98034.3	118636	187285	77991.7	145751	288086	246257	125265
BURKHOLDERIALES	0.243383	0.0550776	0.0629615	0.0170594	0.115592	0.308769	0.322083	0.353361	0.506293
DELTAPROTEOBACTERIA	0.0664952	0.0847812	0.039759	0.257252	0.107701	0.0259996	0.0101796	0.0231551	0.0284828
unassigned BETAPROTEOBACTERIA	0.0547292	0.0317782	0.0317884	0.0109755	0.0242563	0.067667	0.131369	0.0269329	0.0421406
unassigned BACTERIA	0.0539814	0.0440164	0.0525026	0.0687278	0.0673917	0.0635096	0.0362021	0.0464814	0.0773302
unassigned UNCLASSIFIED BACTERIA	0.0491538	0.0558082	0.0377586	0.10459	0.0823503	0.0284372	0.0208122	0.0485368	0.041685
unassigned ALPHAPROTEOBACTERIA	0.0318184	0.0228548	0.0313075	0.0172926	0.0385724	0.0399227	0.0395888	0.0339989	0.0252433
unassigned EUKARYOTA	0.0306027	0.0312071	0.033364	0.0370613	0.0345592	0.0303781	0.0192855	0.0355211	0.032015
unassigned GAMMAPROTEOBACTERIA	0.0302575	0.0575409	0.051233	0.0142416	0.0658261	0.0362061	0.0208536	0.0218887	0.0219971
FLAVOBACTERIIA	0.0276772	0.0199559	0.0244122	0	0	0.139038	0.0233946	0.015317	0
CLOSTRIDIALES	0.0263122	0.0228348	0.0200155	0.036491	0.0356901	0.0159063	0	0.05217	0.0357274
UNCLASSIFIED BETAPROTEOBACTERIA	0.0226014	0.0133837	0.0109788	0.0241639	0.0198554	0.0198084	0.051511	0.0108813	0
ACTINOBACTERIDAE	0.0198391	0.015505	0.0202614	0	0.0112601	0.0255381	0.0590614	0	0
SPHINGOMONADALES	0.0198012	0.011847	0.038638	0	0	0	0.0685382	0	0
unassigned BACTEROIDETES	0.0188264	0.0183078	0.0159426	0.0114449	0.0152508	0.0187922	0.0153553	0.0275274	0.0261431
SPHINGOBACTERIIA	0.017722	0.0156879	0.0242499	0	0	0.0128693	0.0573545	0	0
unassigned MICROGENOMATES	0.0176035	0.0164623	0.0277216	0.0304141	0.022764	0.0120251	0.0120395	0.0109582	0.0188985
UNCLASSIFIED ACTINOBACTERIA	0.0125797	0	0	0	0	0	0.0562121	0	0
UNCLASSIFIED MICROGENOMATES	0.0118637	0.0154791	0.0225053	0.0336993	0.0264425	0	0	0.0110094	0
unassigned CHLOROFLEXI	0.0118067	0.0137646	0.0127647	0.0199619	0.0191709	0	0	0.0204706	0.0164476
XANTHOMONADALES	0.0114129	0	0.0116762	0	0.0112534	0	0	0.0402259	0.0201421
unassigned ACTINOBACTERIA	0.0109886	0.0118827	0.0157136	0.0154122	0.0106097	0.00881481	0.00342323	0.0141413	0.0131664
PLANCTOMYCETALES	0.0109178	0.0254206	0.0407005	0	0	0.024123	0.0111701	0	0
METHYLOCOCCALES	0.0102798	0	0	0	0	0	0	0.0537375	0
unassigned FIRMICUTES	0.00997087	0.00555997	0.00510359	0.00547424	0.00526268	0.0117783	0.0144822	0.0115719	0.0120613
unassigned CHLAMYDIAE/VERRUCOMICROBIA GROUP	0.00880392	0.00366504	0.00188481	0.0150291	0.0137837	0.00672708	0.0106885	0.0113743	0
unassigned MOLLICUTES	0.00766655	0.0136635	0.0120053	0.0134768	0.0122077	0	0	0.014738	0
unassigned STRAMENOPILES	0.007603	0.0186426	0.012743	0.0175028	0.0152323	0.0135985	0	0	0
THERMOANAEROBACTERALES	0.00754704	0	0	0.019485	0.0151703	0	0	0.0146132	0.0102529
SPIROCHAETALES	0.00754253	0.0154918	0.0106063	0.0172346	0.0156721	0	0	0.0100807	0
NITROSPIRALES	0.00699335	0.0128188	0	0.0335113	0.018845	0	0	0	0
unassigned ARCHAEA	0.00698863	0.0218553	0.0153426	0.0102204	0.00965316	0.0119142	0	0	0.00503148
RHIZOBIALES	0.00643268	0.0209506	0.0375571	0	0	0.012153	0	0	0
unassigned FIBROBACTERES/ACIDOBACTERIA GROUP	0.00620648	0.0126391	0.01618	0.00774008	0.00685618	0	0	0.0115599	0
unassigned CLOSTRIDIA	0.00570718	0.00911305	0.00687346	0.00873872	0.00716813	0.00558318	0	0.00793992	0.00537545
unassigned PROTEOBACTERIA	0.00561992	0.00808842	0.00885245	0.00703629	0.0116268	0.0045995	0.00271811	0.00479323	0.00425507
unassigned PLANCTOMYCETES	0.00555707	0.00851407	0.00393043	0.00482896	0.0134621	0.00362111	0.00134931	0.0121087	0
UNCLASSIFIED PARCUBACTERIA	0.00505314	0.0115558	0.0113746	0.0160273	0.0130906	0	0	0	0
unassigned BACILLI	0.00495093	0.0126386	0.00941635	0.0101981	0.0108024	0	0	0.00513605	0
unassigned VERRUCOMICROBIA	0.00453947	0.0168413	0.0162921	0	0	0.0155048	0	0	0
RICKETTSIALES	0.00417255	0.0132413	0.0159678	0	0	0.0149493	0	0	0
RHODOBACTERALES	0.00416827	0.010468	0.0365791	0	0	0	0	0	0
unassigned BACTEROIDETES/CHLOROBI GROUP	0.0040354	0.00519178	0.00345298	0.00836986	0.00698544	0.00393872	0.00143005	0.00378001	0.00197111
unassigned MARINIMICROBIA	0.0039214	0	0	0.0204408	0.01564	0	0	0	0
RHODOSPIRILLALES	0.00377311	0.0120878	0.0151873	0	0	0.0128326	0	0	0
LEGIONELLALES	0.00360807	0.011641	0.0295312	0	0	0	0	0	0
unassigned CELLULAR ORGANISMS	0.00355197	1.20991e-06	1.00386e-05	3.10798e-16	0	9.30037e-07	0.00764505	0.00961839	0
unassigned DELTA/EPSILON SUBDIVISIONS	0.00336994	0.00531143	0.00446687	0.00342535	0.00296897	0.00275995	0.00149964	0.00482232	0.0031343
unassigned EURYARCHAEOTA	0.00335701	0.0185165	0	0.00489139	0.0148868	0	0	0	0.00342572
BACILLALES	0.00335628	0	0.013775	0	0	0	0	0.0109087	0
BACTEROIDIA	0.00327506	0	0	0	0	0	0	0.0171203	0
unassigned DEHALOCOCCOIDIA	0.0028392	0	0	0.0140205	0.0131948	0	0	0	0
METHANOBACTERIALES	0.00271406	0	0	0.0104905	0	0	0	0	0.012207
CHLAMYDIIA	0.00263343	0.0161335	0.0152432	0	0	0	0	0	0
PSEUDOMONADALES	0.00262021	0.0154749	0.0156439	0	0	0	0	0	0
unassigned PARCUBACTERIA	0.00252674	0.00578009	0.00568731	0.00801366	0.0065453	0	0	0	0
CORIOBACTERIDAE	0.00204077	0	0	0	0	0	0	0	0.0209723
CYTOPHAGIA	0.00199151	0.0103842	0.0130287	0	0	0	0	0	0
unassigned PLANCTOMYCETIA	0.00187915	0.00200244	0.00106335	0.0101168	0	0.000732083	0.000330293	0	0
unassigned ACTINOBACTERIA	0.00183149	0.00281354	0.00406412	0.0015288	0.00174849	0.00136474	0.00134849	0.00127688	0.00219689
unassigned AQUIFICAE	0.00177877	0	0	0.0122264	0	0	0	0	0
THERMOTOGALES	0.0017383	0	0	0.0119483	0	0	0	0	0
RHODOCYCLALES	0.00142279	0	0	0	0.0234842	0	0	0	0
unassigned THAUMARCHAEOTA	0.00126875	0.0042048	0.0102924	0	0	0	0	0	0
CHROMATIALES	0.00121252	0	0	0	0.0200134	0	0	0	0
unassigned DEINOCOCCI	0.00121136	0	0	0	0	0	0	0	0.0124487
unassigned CANDIDATUS SACCHARIBACTERIA	0.00120399	0	0.0130643	0	0	0	0	0	0
unassigned THERMOTOGAE	0.00105598	0	0	0.00238129	0.0117113	0	0	0	0
unassigned ELUSIMICROBIA	0.000986284	0.0129511	0	0	0	0	0	0	0
unassigned CYANOBACTERIA	0.000978093	0.0128435	0	0	0	0	0	0	0
OPITUTAE	0.000961744	0.0126288	0	0	0	0	0	0	0
VERRUCOMICROBIAE	0.000916383	0.0120332	0	0	0	0	0	0	0
unassigned ACIDOBACTERIA	0.000907813	0.0119207	0	0	0	0	0	0	0
NITROSOPUMILACEAE	0.000825636	0.0108416	0	0	0	0	0	0	0
unassigned FUNGI	0.000766657	0.0100671	0	0	0	0	0	0	0
unassigned CHLAMYDIAE	0.000635817	0.00380341	0.00375624	0	0	0	0	0	0
unassigned TENERICUTES	0.000615154	0.00087063	0.00100841	0.000951702	0.000779734	0	0	0.00141257	0
unassigned THERMOTOGAE	0.000460824	0	0	0.00238129	0.00188793	0	0	0	0
unassigned ROOT	0.000362025	0.000254473	0.00313632	1.39928e-05	9.46265e-05	0.000137785	7.40907e-05	4.74472e-05	4.7071e-05
unassigned SPIROCHAETIA	0.000322575	0.000414029	0.000312175	0.000918383	0.000880546	0	0	0.000393712	0
unassigned SPIROCHAETES	0.000321798	0.000414029	0.000312175	0.000918383	0.000880546	0	0	0.000389648	0
unassigned NITROSPIRAE	0.000162239	0.000317407	0	0.000757816	0.000459109	0	0	0	0
unassigned NITROSPIRA	0.000161842	0.000317407	0	0.000755092	0.000459109	0	0	0	0
unassigned DEINOCOCCUS THERMUS	7.03903e-05	0	0	0	0	0	0	0	0.000723378
unassigned NITROSOPUMILALES	5.52218e-05	0.000725128	0	0	0	0	0	0	0
unassigned OPISTHOKONTA	5.41891e-05	0.000711567	0	0	0	0	0	0	0
unassigned METHANOBACTERIA	4.10262e-05	0	0	0.000158171	0	0	0	0	0.00018513

## Sheet: percent family
Family	All Samples	BR2-river-2012a	BR2-river-2013	BR2-spring-2012	BR2-spring-2013	GOR34-river-2012a	GOR34-river-2013b	GOR34-spring1-2013b	GOR34-spring3-2012
All Families	1.28731e+06	98034.3	118636	187285	77991.7	145751	288086	246257	125265
COMAMONADACEAE	0.15174	0.0258149	0.0396412	0.0108723	0.0623032	0.210231	0.133551	0.264892	0.374084
unassigned BETAPROTEOBACTERIA	0.0547292	0.0317782	0.0317884	0.0109755	0.0242563	0.067667	0.131369	0.0269329	0.0421406
unassigned BACTERIA	0.0539814	0.0440164	0.0525026	0.0687278	0.0673917	0.0635096	0.0362021	0.0464814	0.0773302
unassigned UNCLASSIFIED BACTERIA	0.0491538	0.0558082	0.0377586	0.10459	0.0823503	0.0284372	0.0208122	0.0485368	0.041685
BURKHOLDERIACEAE	0.0401202	0	0	0	0	0.0502286	0.153864	0	0
DESULFOVIBRIONALES	0.0350974	0	0	0.204544	0.0679616	0	0	0	0.0125552
unassigned ALPHAPROTEOBACTERIA	0.0318184	0.0228548	0.0313075	0.0172926	0.0385724	0.0399227	0.0395888	0.0339989	0.0252433
UNCLASSIFIED BURKHOLDERIALES	0.0306565	0.0171757	0.0119359	0	0.0369167	0.0308102	0.0112672	0.057471	0.0925729
unassigned EUKARYOTA	0.0306027	0.0312071	0.033364	0.0370613	0.0345592	0.0303781	0.0192855	0.0355211	0.032015
unassigned GAMMAPROTEOBACTERIA	0.0302575	0.0575409	0.051233	0.0142416	0.0658261	0.0362061	0.0208536	0.0218887	0.0219971
unassigned CLOSTRIDIALES	0.0263122	0.0228348	0.0200155	0.036491	0.0356901	0.0159063	0	0.05217	0.0357274
FLAVOBACTERIALES	0.0256335	0.0168492	0.0218836	0	0	0.1356	0.0217428	0.0110559	0
unassigned DELTAPROTEOBACTERIA	0.0238907	0.0314636	0.039759	0.0290176	0.0397396	0.0259996	0.0101796	0.0231551	0.0159276
ACTINOMYCETALES	0.0193387	0.0140349	0.0191644	0	0.0107727	0.0249275	0.0582185	0	0
unassigned BACTEROIDETES	0.0188264	0.0183078	0.0159426	0.0114449	0.0152508	0.0187922	0.0153553	0.0275274	0.0261431
unassigned BURKHOLDERIALES	0.0184039	0.012087	0.0113844	0.00618711	0.0163725	0.0174988	0.0123975	0.0309972	0.0396358
unassigned MICROGENOMATES	0.0176035	0.0164623	0.0277216	0.0304141	0.022764	0.0120251	0.0120395	0.0109582	0.0188985
SPHINGOBACTERIALES	0.0175884	0.0153581	0.0239755	0	0	0.012614	0.0571121	0	0
UNCLASSIFIED ACTINOBACTERIA MISCELLANEOUS	0.0125546	0	0	0	0	0	0.0560998	0	0
SPHINGOMONADACEAE	0.012506	0	0.0268466	0	0	0	0.0448273	0	0
unassigned CHLOROFLEXI	0.0118067	0.0137646	0.0127647	0.0199619	0.0191709	0	0	0.0204706	0.0164476
UNCLASSIFIED BETAPROTEOBACTERIA MISCELLANEOUS	0.0116515	0	0	0	0	0.0128618	0.0455572	0	0
unassigned ACTINOBACTERIA	0.0109886	0.0118827	0.0157136	0.0154122	0.0106097	0.00881481	0.00342323	0.0141413	0.0131664
XANTHOMONADACEAE	0.0104289	0	0.0105658	0	0	0	0	0.039441	0.0196316
unassigned FIRMICUTES	0.00997087	0.00555997	0.00510359	0.00547424	0.00526268	0.0117783	0.0144822	0.0115719	0.0120613
unassigned UNCLASSIFIED MICROGENOMATES	0.00912945	0.0154791	0.00905938	0.0234227	0.0264425	0	0	0.0110094	0
unassigned CHLAMYDIAE/VERRUCOMICROBIA GROUP	0.00880392	0.00366504	0.00188481	0.0150291	0.0137837	0.00672708	0.0106885	0.0113743	0
unassigned MOLLICUTES	0.00766655	0.0136635	0.0120053	0.0134768	0.0122077	0	0	0.014738	0
unassigned STRAMENOPILES	0.007603	0.0186426	0.012743	0.0175028	0.0152323	0.0135985	0	0	0
METHYLOCOCCACEAE	0.00759651	0	0	0	0	0	0	0.0397107	0
CANDIDATUS TREMBLAYA	0.007553	0.012658	0	0.0240528	0.0191111	0	0	0.0100987	0
unassigned THERMOANAEROBACTERALES	0.00754704	0	0	0.019485	0.0151703	0	0	0.0146132	0.0102529
unassigned SPIROCHAETALES	0.00754253	0.0154918	0.0106063	0.0172346	0.0156721	0	0	0.0100807	0
unassigned SPHINGOMONADALES	0.00729514	0.011847	0.0117914	0	0	0	0.0237109	0	0
unassigned ARCHAEA	0.00698863	0.0218553	0.0153426	0.0102204	0.00965316	0.0119142	0	0	0.00503148
NITROSPIRACEAE	0.00683151	0.0125014	0	0.0327562	0.0183859	0	0	0	0
unassigned RHIZOBIALES	0.00643268	0.0209506	0.0375571	0	0	0.012153	0	0	0
unassigned FIBROBACTERES/ACIDOBACTERIA GROUP	0.00620648	0.0126391	0.01618	0.00774008	0.00685618	0	0	0.0115599	0
PLANCTOMYCETACEAE	0.0061971	0.0187113	0.0296005	0	0	0.0180549	0	0	0
unassigned CLOSTRIDIA	0.00570718	0.00911305	0.00687346	0.00873872	0.00716813	0.00558318	0	0.00793992	0.00537545
unassigned PROTEOBACTERIA	0.00561992	0.00808842	0.00885245	0.00703629	0.0116268	0.0045995	0.00271811	0.00479323	0.00425507
unassigned PLANCTOMYCETES	0.00555707	0.00851407	0.00393043	0.00482896	0.0134621	0.00362111	0.00134931	0.0121087	0
unassigned UNCLASSIFIED PARCUBACTERIA	0.00505314	0.0115558	0.0113746	0.0160273	0.0130906	0	0	0	0
unassigned BACILLI	0.00495093	0.0126386	0.00941635	0.0101981	0.0108024	0	0	0.00513605	0
unassigned PLANCTOMYCETALES	0.00472071	0.00670932	0.0110999	0	0	0.00606815	0.0111701	0	0
unassigned VERRUCOMICROBIA	0.00453947	0.0168413	0.0162921	0	0	0.0155048	0	0	0
unassigned RICKETTSIALES	0.00417255	0.0132413	0.0159678	0	0	0.0149493	0	0	0
unassigned BACTEROIDETES/CHLOROBI GROUP	0.0040354	0.00519178	0.00345298	0.00836986	0.00698544	0.00393872	0.00143005	0.00378001	0.00197111
unassigned MARINIMICROBIA	0.0039214	0	0	0.0204408	0.01564	0	0	0	0
unassigned RHODOSPIRILLALES	0.00377311	0.0120878	0.0151873	0	0	0.0128326	0	0	0
unassigned CELLULAR ORGANISMS	0.00355197	1.20991e-06	1.00386e-05	3.10798e-16	0	9.30037e-07	0.00764505	0.00961839	0
unassigned UNCLASSIFIED BETAPROTEOBACTERIA	0.00339694	0.000725785	0.0109788	0.000111043	0.00074432	0.00694655	0.00595382	0.000782628	0
unassigned DELTA/EPSILON SUBDIVISIONS	0.00336994	0.00531143	0.00446687	0.00342535	0.00296897	0.00275995	0.00149964	0.00482232	0.0031343
unassigned EURYARCHAEOTA	0.00335701	0.0185165	0	0.00489139	0.0148868	0	0	0	0.00342572
unassigned BACILLALES	0.00335628	0	0.013775	0	0	0	0	0.0109087	0
RHODOBACTERACEAE	0.00286315	0	0.0310677	0	0	0	0	0	0
unassigned DEHALOCOCCOIDIA	0.0028392	0	0	0.0140205	0.0131948	0	0	0	0
unassigned METHYLOCOCCALES	0.00268328	0	0	0	0	0	0	0.0140268	0
METHANOBACTERIACEAE	0.00265433	0	0	0.0102581	0	0	0	0	0.0119407
BACTEROIDALES	0.00260936	0	0	0	0	0	0	0.0136404	0
unassigned PARCUBACTERIA	0.00252674	0.00578009	0.00568731	0.00801366	0.0065453	0	0	0	0
BDELLOVIBRIONALES	0.00252236	0.0331216	0	0	0	0	0	0	0
OXALOBACTERACEAE	0.00246261	0	0	0	0	0	0.0110041	0	0
unassigned FLAVOBACTERIIA	0.00204371	0.00310668	0.00252863	0	0	0.00343835	0.0016518	0.00426111	0
CHLAMYDIALES	0.00199761	0.0123301	0.0114869	0	0	0	0	0	0
CYTOPHAGALES	0.00196618	0.0102392	0.0128737	0	0	0	0	0	0
unassigned PLANCTOMYCETIA	0.00187915	0.00200244	0.00106335	0.0101168	0	0.000732083	0.000330293	0	0
unassigned ACTINOBACTERIA	0.00183149	0.00281354	0.00406412	0.0015288	0.00174849	0.00136474	0.00134849	0.00127688	0.00219689
unassigned AQUIFICAE	0.00177877	0	0	0.0122264	0	0	0	0	0
unassigned THERMOTOGALES	0.0017383	0	0	0.0119483	0	0	0	0	0
UNCLASSIFIED DELTAPROTEOBACTERIA	0.00173108	0	0	0.0118986	0	0	0	0	0
DESULFURELLALES	0.00171566	0	0	0.0117926	0	0	0	0	0
unassigned PSEUDOMONADALES	0.00170477	0.00345418	0.0156439	0	0	0	0	0	0
CORIOBACTERIALES	0.00169938	0	0	0	0	0	0	0	0.017464
MYXOCOCCALES	0.00153802	0.020196	0	0	0	0	0	0	0
MICROGENOMATES BACTERIUM SCGC AAA011 L6	0.0014951	0	0	0.0102766	0	0	0	0	0
LEGIONELLACEAE	0.00144025	0	0.0156279	0	0	0	0	0	0
RHODOCYCLACEAE	0.0013102	0	0	0	0.0216257	0	0	0	0
unassigned RHODOBACTERALES	0.00130512	0.010468	0.00551145	0	0	0	0	0	0
unassigned THAUMARCHAEOTA	0.00126875	0.0042048	0.0102924	0	0	0	0	0	0
CANDIDATUS MICROGENOMATUS AURICOLA SCGC AAA011 E14	0.00123916	0	0.0134459	0	0	0	0	0	0
unassigned DEINOCOCCI	0.00121136	0	0	0	0	0	0	0	0.0124487
unassigned CANDIDATUS SACCHARIBACTERIA	0.00120399	0	0.0130643	0	0	0	0	0	0
COXIELLACEAE	0.00114414	0	0.0124149	0	0	0	0	0	0
unassigned THERMOTOGAE	0.00105598	0	0	0.00238129	0.0117113	0	0	0	0
unassigned LEGIONELLALES	0.00102369	0.011641	0.00148843	0	0	0	0	0	0
unassigned ELUSIMICROBIA	0.000986284	0.0129511	0	0	0	0	0	0	0
unassigned XANTHOMONADALES	0.00098395	0	0.00111048	0	0.0112534	0	0	0.000784876	0.000510513
unassigned CYANOBACTERIA	0.000978093	0.0128435	0	0	0	0	0	0	0
unassigned OPITUTAE	0.000961744	0.0126288	0	0	0	0	0	0	0
VERRUCOMICROBIALES	0.000916383	0.0120332	0	0	0	0	0	0	0
PSEUDOMONADACEAE	0.000915433	0.0120207	0	0	0	0	0	0	0
unassigned ACIDOBACTERIA	0.000907813	0.0119207	0	0	0	0	0	0	0
unassigned NITROSOPUMILACEAE	0.000825636	0.0108416	0	0	0	0	0	0	0
unassigned FUNGI	0.000766657	0.0100671	0	0	0	0	0	0	0
ECTOTHIORHODOSPIRACEAE	0.000682456	0	0	0	0.0112644	0	0	0	0
unassigned BACTEROIDIA	0.0006657	0	0	0	0	0	0	0.00347994	0
unassigned CHLAMYDIAE	0.000635817	0.00380341	0.00375624	0	0	0	0	0	0
unassigned CHLAMYDIIA	0.000635817	0.00380341	0.00375624	0	0	0	0	0	0
unassigned TENERICUTES	0.000615154	0.00087063	0.00100841	0.000951702	0.000779734	0	0	0.00141257	0
unassigned CHROMATIALES	0.000530059	0	0	0	0.00874899	0	0	0	0
unassigned ACTINOBACTERIDAE	0.000500345	0.00147005	0.00109691	0	0.000487442	0.000610587	0.000842936	0	0
unassigned THERMOTOGAE	0.000460824	0	0	0.00238129	0.00188793	0	0	0	0
unassigned ROOT	0.000362025	0.000254473	0.00313632	1.39928e-05	9.46265e-05	0.000137785	7.40907e-05	4.74472e-05	4.7071e-05
unassigned CORIOBACTERIDAE	0.000341384	0	0	0	0	0	0	0	0.00350829
unassigned SPIROCHAETIA	0.000322575	0.000414029	0.000312175	0.000918383	0.000880546	0	0	0.000393712	0
unassigned SPIROCHAETES	0.000321798	0.000414029	0.000312175	0.000918383	0.000880546	0	0	0.000389648	0
unassigned NITROSPIRAE	0.000162239	0.000317407	0	0.000757816	0.000459109	0	0	0	0
unassigned NITROSPIRA	0.000161842	0.000317407	0	0.000755092	0.000459109	0	0	0	0
unassigned NITROSPIRALES	0.000161842	0.000317407	0	0.000755092	0.000459109	0	0	0	0
unassigned SPHINGOBACTERIIA	0.000133533	0.000329786	0.000274393	0	0	0.000255265	0.000242323	0	0
unassigned RHODOCYCLALES	0.000112595	0	0	0	0.00185846	0	0	0	0
unassigned DEINOCOCCUS THERMUS	7.03903e-05	0	0	0	0	0	0	0	0.000723378
unassigned METHANOBACTERIALES	5.97286e-05	0	0	0.000232425	0	0	0	0	0.00026631
unassigned NITROSOPUMILALES	5.52218e-05	0.000725128	0	0	0	0	0	0	0
unassigned OPISTHOKONTA	5.41891e-05	0.000711567	0	0	0	0	0	0	0
unassigned METHANOBACTERIA	4.10262e-05	0	0	0.000158171	0	0	0	0	0.00018513
unassigned CYTOPHAGIA	2.53307e-05	0.000144991	0.000155048	0	0	0	0	0	0
unassigned UNCLASSIFIED ACTINOBACTERIA	2.51319e-05	0	0	0	0	0	0.000112301	0	0

## Sheet: phylosift probability order
Order	All Samples	BR2-river-2012a	BR2-river-2013	BR2-spring-2012	BR2-spring-2013	GOR34-river-2012a	GOR34-river-2013b	GOR34-spring1-2013b	GOR34-spring3-2012
All Orders	1.28731e+06	98034.3	118636	187285	77991.7	145751	288086	246257	125265
BURKHOLDERIALES	313309	5399.49	7469.52	3194.96	9015.24	45003.4	92787.7	87017.5	63420.8
DELTAPROTEOBACTERIA	85599.6	8311.47	4716.86	48179.5	8399.8	3789.47	2932.61	5702.09	3567.89
unassigned BETAPROTEOBACTERIA	70453.2	3115.35	3771.26	2055.53	1891.79	9862.54	37845.5	6632.41	5278.75
unassigned BACTERIA	69490.5	4315.11	6228.71	12871.7	5255.99	9256.59	10429.3	11446.4	9686.76
unassigned UNCLASSIFIED BACTERIA	63276	5471.12	4479.53	19588.1	6422.64	4144.75	5995.71	11952.5	5221.67
unassigned ALPHAPROTEOBACTERIA	40960	2240.55	3714.21	3238.64	3008.33	5818.78	11405	8372.47	3162.09
unassigned EUKARYOTA	39395.1	3059.36	3958.18	6941.02	2695.33	4427.64	5555.89	8747.31	4010.36
unassigned GAMMAPROTEOBACTERIA	38950.6	5640.98	6078.09	2667.23	5133.88	5277.08	6007.64	5390.24	2755.47
FLAVOBACTERIIA	35629	1956.36	2896.17	0	0	20264.9	6739.66	3771.92	0
CLOSTRIDIALES	33871.9	2238.6	2374.56	6834.21	2783.53	2318.36	0	12847.2	4475.39
UNCLASSIFIED BETAPROTEOBACTERIA	29094.9	1312.07	1302.49	4525.52	1548.56	2887.09	14839.6	2679.6	0
ACTINOBACTERIDAE	25538.9	1520.02	2403.73	0	878.196	3722.21	17014.8	0	0
SPHINGOMONADALES	25490.2	1161.41	4583.87	0	0	0	19744.9	0	0
unassigned BACTEROIDETES	24235.3	1794.8	1891.37	2143.45	1189.44	2738.98	4423.64	6778.8	3274.81
SPHINGOBACTERIIA	22813.6	1537.95	2876.92	0	0	1875.71	16523	0	0
unassigned MICROGENOMATES	22661.1	1613.87	3288.78	5696.1	1775.4	1752.67	3468.42	2698.54	2367.32
UNCLASSIFIED ACTINOBACTERIA	16193.9	0	0	0	0	0	16193.9	0	0
UNCLASSIFIED MICROGENOMATES	15272.2	1517.48	2669.94	6311.36	2062.29	0	0	2711.14	0
unassigned CHLOROFLEXI	15198.8	1349.4	1514.35	3738.56	1495.17	0	0	5041.02	2060.3
XANTHOMONADALES	14691.9	0	1385.23	0	877.67	0	0	9905.9	2523.09
unassigned ACTINOBACTERIA	14145.7	1164.92	1864.21	2886.47	827.469	1284.77	986.186	3482.39	1649.29
PLANCTOMYCETALES	14054.6	2492.09	4828.55	0	0	3515.96	3217.96	0	0
METHYLOCOCCALES	13233.2	0	0	0	0	0	0	13233.2	0
unassigned FIRMICUTES	12835.6	545.067	605.471	1025.24	410.445	1716.7	4172.12	2849.66	1510.86
unassigned CHLAMYDIAE/VERRUCOMICROBIA GROUP	11333.3	359.299	223.606	2814.73	1075.02	980.479	3079.2	2801	0
unassigned MOLLICUTES	9869.2	1339.49	1424.26	2524.01	952.101	0	0	3629.34	0
unassigned STRAMENOPILES	9787.39	1827.61	1511.79	3278	1187.99	1982	0	0	0
THERMOANAEROBACTERALES	9715.34	0	0	3649.25	1183.16	0	0	3598.61	1284.32
SPIROCHAETALES	9709.54	1518.72	1258.29	3227.79	1222.29	0	0	2482.44	0
NITROSPIRALES	9002.58	1256.68	0	6276.15	1469.75	0	0	0	0
unassigned ARCHAEA	8996.51	2142.57	1820.18	1914.12	752.866	1736.5	0	0	630.269
RHIZOBIALES	8280.83	2053.88	4455.64	0	0	1771.31	0	0	0
unassigned FIBROBACTERES/ACIDOBACTERIA GROUP	7989.64	1239.06	1919.54	1449.6	534.725	0	0	2846.71	0
unassigned CLOSTRIDIA	7346.89	893.391	815.442	1636.63	559.054	813.754	0	1955.26	673.355
unassigned PROTEOBACTERIA	7234.55	792.943	1050.22	1317.79	906.79	670.382	783.05	1180.37	533.01
unassigned PLANCTOMYCETES	7153.65	834.671	466.291	904.391	1049.93	527.78	388.717	2981.86	0
UNCLASSIFIED PARCUBACTERIA	6504.93	1132.86	1349.44	3001.67	1020.96	0	0	0	0
unassigned BACILLI	6373.37	1239.01	1117.12	1909.95	842.495	0	0	1264.79	0
unassigned VERRUCOMICROBIA	5843.69	1651.02	1932.83	0	0	2259.84	0	0	0
RICKETTSIALES	5371.35	1298.1	1894.37	0	0	2178.88	0	0	0
RHODOBACTERALES	5365.84	1026.23	4339.61	0	0	0	0	0	0
unassigned BACTEROIDETES/CHLOROBI GROUP	5194.79	508.972	409.649	1567.55	544.806	574.073	411.976	930.855	246.91
unassigned MARINIMICROBIA	5048.04	0	0	3828.25	1219.79	0	0	0	0
RHODOSPIRILLALES	4857.15	1185.02	1801.76	0	0	1870.36	0	0	0
LEGIONELLALES	4644.69	1141.22	3503.47	0	0	0	0	0	0
unassigned CELLULAR ORGANISMS	4572.47	0.118613	1.19094	5.82077e-11	0	0.135554	2202.43	2368.59	0
unassigned DELTA/EPSILON SUBDIVISIONS	4338.14	520.702	529.933	641.516	231.555	402.265	432.024	1187.53	392.618
unassigned EURYARCHAEOTA	4321.5	1815.25	0	916.082	1161.04	0	0	0	429.122
BACILLALES	4320.55	0	1634.22	0	0	0	0	2686.34	0
BACTEROIDIA	4216	0	0	0	0	0	0	4216	0
unassigned DEHALOCOCCOIDIA	3654.92	0	0	2625.83	1029.09	0	0	0	0
METHANOBACTERIALES	3493.82	0	0	1964.72	0	0	0	0	1529.11
CHLAMYDIIA	3390.03	1581.63	1808.39	0	0	0	0	0	0
PSEUDOMONADALES	3373.01	1517.07	1855.94	0	0	0	0	0	0
unassigned PARCUBACTERIA	3252.68	566.647	674.721	1500.84	510.479	0	0	0	0
CORIOBACTERIDAE	2627.09	0	0	0	0	0	0	0	2627.09
CYTOPHAGIA	2563.68	1018.01	1545.68	0	0	0	0	0	0
unassigned PLANCTOMYCETIA	2419.04	196.307	126.151	1894.73	0	106.702	95.1528	0	0
unassigned ACTINOBACTERIA	2357.69	275.823	482.153	286.321	136.368	198.912	388.481	314.44	275.193
unassigned AQUIFICAE	2289.81	0	0	2289.81	0	0	0	0	0
THERMOTOGALES	2237.73	0	0	2237.73	0	0	0	0	0
RHODOCYCLALES	1831.57	0	0	0	1831.57	0	0	0	0
unassigned THAUMARCHAEOTA	1633.26	412.214	1221.05	0	0	0	0	0	0
CHROMATIALES	1560.88	0	0	0	1560.88	0	0	0	0
unassigned DEINOCOCCI	1559.39	0	0	0	0	0	0	0	1559.39
unassigned CANDIDATUS SACCHARIBACTERIA	1549.9	0	1549.9	0	0	0	0	0	0
unassigned THERMOTOGAE	1359.36	0	0	445.978	913.386	0	0	0	0
unassigned ELUSIMICROBIA	1269.65	1269.65	0	0	0	0	0	0	0
unassigned CYANOBACTERIA	1259.1	1259.1	0	0	0	0	0	0	0
OPITUTAE	1238.06	1238.06	0	0	0	0	0	0	0
VERRUCOMICROBIAE	1179.66	1179.66	0	0	0	0	0	0	0
unassigned ACIDOBACTERIA	1168.63	1168.63	0	0	0	0	0	0	0
NITROSOPUMILACEAE	1062.85	1062.85	0	0	0	0	0	0	0
unassigned FUNGI	986.921	986.921	0	0	0	0	0	0	0
unassigned CHLAMYDIAE	818.491	372.865	445.626	0	0	0	0	0	0
unassigned TENERICUTES	791.891	85.3515	119.634	178.239	60.8128	0	0	347.854	0
unassigned THERMOTOGAE	593.221	0	0	445.978	147.243	0	0	0	0
unassigned ROOT	466.036	24.947	372.081	2.62064	7.38008	20.0822	21.3445	11.6842	5.89635
unassigned SPIROCHAETIA	415.253	40.589	37.0353	171.999	68.6752	0	0	96.9544	0
unassigned SPIROCHAETES	414.252	40.589	37.0353	171.999	68.6752	0	0	95.9534	0
unassigned NITROSPIRAE	208.851	31.1168	0	141.927	35.8067	0	0	0	0
unassigned NITROSPIRA	208.341	31.1168	0	141.417	35.8067	0	0	0	0
unassigned DEINOCOCCUS THERMUS	90.6139	0	0	0	0	0	0	0	90.6139
unassigned NITROSOPUMILALES	71.0873	71.0873	0	0	0	0	0	0	0
unassigned OPISTHOKONTA	69.758	69.758	0	0	0	0	0	0	0
unassigned METHANOBACTERIA	52.8132	0	0	29.6229	0	0	0	0	23.1903

## Sheet: phylosift probability family
Family	All Samples	BR2-river-2012a	BR2-river-2013	BR2-spring-2012	BR2-spring-2013	GOR34-river-2012a	GOR34-river-2013b	GOR34-spring1-2013b	GOR34-spring3-2012
All Families	1.28731e+06	98034.3	118636	187285	77991.7	145751	288086	246257	125265
COMAMONADACEAE	195336	2530.75	4702.88	2036.21	4859.13	30641.4	38474	65231.6	46859.7
unassigned BETAPROTEOBACTERIA	70453.2	3115.35	3771.26	2055.53	1891.79	9862.54	37845.5	6632.41	5278.75
unassigned BACTERIA	69490.5	4315.11	6228.71	12871.7	5255.99	9256.59	10429.3	11446.4	9686.76
unassigned UNCLASSIFIED BACTERIA	63276	5471.12	4479.53	19588.1	6422.64	4144.75	5995.71	11952.5	5221.67
BURKHOLDERIACEAE	51647	0	0	0	0	7320.87	44326.1	0	0
DESULFOVIBRIONALES	45181.1	0	0	38307.9	5300.44	0	0	0	1572.72
unassigned ALPHAPROTEOBACTERIA	40960	2240.55	3714.21	3238.64	3008.33	5818.78	11405	8372.47	3162.09
UNCLASSIFIED BURKHOLDERIALES	39464.3	1683.81	1416.03	0	2879.19	4490.61	3245.92	14152.6	11596.1
unassigned EUKARYOTA	39395.1	3059.36	3958.18	6941.02	2695.33	4427.64	5555.89	8747.31	4010.36
unassigned GAMMAPROTEOBACTERIA	38950.6	5640.98	6078.09	2667.23	5133.88	5277.08	6007.64	5390.24	2755.47
unassigned CLOSTRIDIALES	33871.9	2238.6	2374.56	6834.21	2783.53	2318.36	0	12847.2	4475.39
FLAVOBACTERIALES	32998.2	1651.8	2596.19	0	0	19763.8	6263.8	2722.6	0
unassigned DELTAPROTEOBACTERIA	30754.6	3084.51	4716.86	5434.55	3099.36	3789.47	2932.61	5702.09	1995.17
ACTINOMYCETALES	24894.8	1375.91	2273.6	0	840.18	3633.21	16771.9	0	0
unassigned BACTEROIDETES	24235.3	1794.8	1891.37	2143.45	1189.44	2738.98	4423.64	6778.8	3274.81
unassigned BURKHOLDERIALES	23691.5	1184.94	1350.6	1158.75	1276.92	2550.47	3571.54	7633.26	4964.98
unassigned MICROGENOMATES	22661.1	1613.87	3288.78	5696.1	1775.4	1752.67	3468.42	2698.54	2367.32
SPHINGOBACTERIALES	22641.7	1505.62	2844.37	0	0	1838.5	16453.2	0	0
UNCLASSIFIED ACTINOBACTERIA MISCELLANEOUS	16161.6	0	0	0	0	0	16161.6	0	0
SPHINGOMONADACEAE	16099.1	0	3184.98	0	0	0	12914.1	0	0
unassigned CHLOROFLEXI	15198.8	1349.4	1514.35	3738.56	1495.17	0	0	5041.02	2060.3
UNCLASSIFIED BETAPROTEOBACTERIA MISCELLANEOUS	14999	0	0	0	0	1874.63	13124.4	0	0
unassigned ACTINOBACTERIA	14145.7	1164.92	1864.21	2886.47	827.469	1284.77	986.186	3482.39	1649.29
XANTHOMONADACEAE	13425.2	0	1253.48	0	0	0	0	9712.62	2459.15
unassigned FIRMICUTES	12835.6	545.067	605.471	1025.24	410.445	1716.7	4172.12	2849.66	1510.86
unassigned UNCLASSIFIED MICROGENOMATES	11752.4	1517.48	1074.77	4386.71	2062.29	0	0	2711.14	0
unassigned CHLAMYDIAE/VERRUCOMICROBIA GROUP	11333.3	359.299	223.606	2814.73	1075.02	980.479	3079.2	2801	0
unassigned MOLLICUTES	9869.2	1339.49	1424.26	2524.01	952.101	0	0	3629.34	0
unassigned STRAMENOPILES	9787.39	1827.61	1511.79	3278	1187.99	1982	0	0	0
METHYLOCOCCACEAE	9779.03	0	0	0	0	0	0	9779.03	0
CANDIDATUS TREMBLAYA	9723.03	1240.91	0	4504.73	1490.51	0	0	2486.88	0
unassigned THERMOANAEROBACTERALES	9715.34	0	0	3649.25	1183.16	0	0	3598.61	1284.32
unassigned SPIROCHAETALES	9709.54	1518.72	1258.29	3227.79	1222.29	0	0	2482.44	0
unassigned SPHINGOMONADALES	9391.08	1161.41	1398.89	0	0	0	6830.78	0	0
unassigned ARCHAEA	8996.51	2142.57	1820.18	1914.12	752.866	1736.5	0	0	630.269
NITROSPIRACEAE	8794.24	1225.56	0	6134.73	1433.95	0	0	0	0
unassigned RHIZOBIALES	8280.83	2053.88	4455.64	0	0	1771.31	0	0	0
unassigned FIBROBACTERES/ACIDOBACTERIA GROUP	7989.64	1239.06	1919.54	1449.6	534.725	0	0	2846.71	0
PLANCTOMYCETACEAE	7977.56	1834.35	3511.7	0	0	2631.52	0	0	0
unassigned CLOSTRIDIA	7346.89	893.391	815.442	1636.63	559.054	813.754	0	1955.26	673.355
unassigned PROTEOBACTERIA	7234.55	792.943	1050.22	1317.79	906.79	670.382	783.05	1180.37	533.01
unassigned PLANCTOMYCETES	7153.65	834.671	466.291	904.391	1049.93	527.78	388.717	2981.86	0
unassigned UNCLASSIFIED PARCUBACTERIA	6504.93	1132.86	1349.44	3001.67	1020.96	0	0	0	0
unassigned BACILLI	6373.37	1239.01	1117.12	1909.95	842.495	0	0	1264.79	0
unassigned PLANCTOMYCETALES	6076.99	657.744	1316.85	0	0	884.438	3217.96	0	0
unassigned VERRUCOMICROBIA	5843.69	1651.02	1932.83	0	0	2259.84	0	0	0
unassigned RICKETTSIALES	5371.35	1298.1	1894.37	0	0	2178.88	0	0	0
unassigned BACTEROIDETES/CHLOROBI GROUP	5194.79	508.972	409.649	1567.55	544.806	574.073	411.976	930.855	246.91
unassigned MARINIMICROBIA	5048.04	0	0	3828.25	1219.79	0	0	0	0
unassigned RHODOSPIRILLALES	4857.15	1185.02	1801.76	0	0	1870.36	0	0	0
unassigned CELLULAR ORGANISMS	4572.47	0.118613	1.19094	5.82077e-11	0	0.135554	2202.43	2368.59	0
unassigned UNCLASSIFIED BETAPROTEOBACTERIA	4372.9	71.1518	1302.49	20.7966	58.0507	1012.47	1715.21	192.727	0
unassigned DELTA/EPSILON SUBDIVISIONS	4338.14	520.702	529.933	641.516	231.555	402.265	432.024	1187.53	392.618
unassigned EURYARCHAEOTA	4321.5	1815.25	0	916.082	1161.04	0	0	0	429.122
unassigned BACILLALES	4320.55	0	1634.22	0	0	0	0	2686.34	0
RHODOBACTERACEAE	3685.75	0	3685.75	0	0	0	0	0	0
unassigned DEHALOCOCCOIDIA	3654.92	0	0	2625.83	1029.09	0	0	0	0
unassigned METHYLOCOCCALES	3454.2	0	0	0	0	0	0	3454.2	0
METHANOBACTERIACEAE	3416.93	0	0	1921.19	0	0	0	0	1495.75
BACTEROIDALES	3359.04	0	0	0	0	0	0	3359.04	0
unassigned PARCUBACTERIA	3252.68	566.647	674.721	1500.84	510.479	0	0	0	0
BDELLOVIBRIONALES	3247.05	3247.05	0	0	0	0	0	0	0
OXALOBACTERACEAE	3170.14	0	0	0	0	0	3170.14	0	0
unassigned FLAVOBACTERIIA	2630.88	304.561	299.987	0	0	501.143	475.86	1049.33	0
CHLAMYDIALES	2571.53	1208.77	1362.76	0	0	0	0	0	0
CYTOPHAGALES	2531.08	1003.79	1527.28	0	0	0	0	0	0
unassigned PLANCTOMYCETIA	2419.04	196.307	126.151	1894.73	0	106.702	95.1528	0	0
unassigned ACTINOBACTERIA	2357.69	275.823	482.153	286.321	136.368	198.912	388.481	314.44	275.193
unassigned AQUIFICAE	2289.81	0	0	2289.81	0	0	0	0	0
unassigned THERMOTOGALES	2237.73	0	0	2237.73	0	0	0	0	0
UNCLASSIFIED DELTAPROTEOBACTERIA	2228.42	0	0	2228.42	0	0	0	0	0
DESULFURELLALES	2208.58	0	0	2208.58	0	0	0	0	0
unassigned PSEUDOMONADALES	2194.57	338.628	1855.94	0	0	0	0	0	0
CORIOBACTERIALES	2187.63	0	0	0	0	0	0	0	2187.63
MYXOCOCCALES	1979.9	1979.9	0	0	0	0	0	0	0
MICROGENOMATES BACTERIUM SCGC AAA011 L6	1924.65	0	0	1924.65	0	0	0	0	0
LEGIONELLACEAE	1854.04	0	1854.04	0	0	0	0	0	0
RHODOCYCLACEAE	1686.63	0	0	0	1686.63	0	0	0	0
unassigned RHODOBACTERALES	1680.08	1026.23	653.857	0	0	0	0	0	0
unassigned THAUMARCHAEOTA	1633.26	412.214	1221.05	0	0	0	0	0	0
CANDIDATUS MICROGENOMATUS AURICOLA SCGC AAA011 E14	1595.17	0	1595.17	0	0	0	0	0	0
unassigned DEINOCOCCI	1559.39	0	0	0	0	0	0	0	1559.39
unassigned CANDIDATUS SACCHARIBACTERIA	1549.9	0	1549.9	0	0	0	0	0	0
COXIELLACEAE	1472.85	0	1472.85	0	0	0	0	0	0
unassigned THERMOTOGAE	1359.36	0	0	445.978	913.386	0	0	0	0
unassigned LEGIONELLALES	1317.8	1141.22	176.582	0	0	0	0	0	0
unassigned ELUSIMICROBIA	1269.65	1269.65	0	0	0	0	0	0	0
unassigned XANTHOMONADALES	1266.64	0	131.743	0	877.67	0	0	193.281	63.9493
unassigned CYANOBACTERIA	1259.1	1259.1	0	0	0	0	0	0	0
unassigned OPITUTAE	1238.06	1238.06	0	0	0	0	0	0	0
VERRUCOMICROBIALES	1179.66	1179.66	0	0	0	0	0	0	0
PSEUDOMONADACEAE	1178.44	1178.44	0	0	0	0	0	0	0
unassigned ACIDOBACTERIA	1168.63	1168.63	0	0	0	0	0	0	0
unassigned NITROSOPUMILACEAE	1062.85	1062.85	0	0	0	0	0	0	0
unassigned FUNGI	986.921	986.921	0	0	0	0	0	0	0
ECTOTHIORHODOSPIRACEAE	878.529	0	0	0	878.529	0	0	0	0
unassigned BACTEROIDIA	856.959	0	0	0	0	0	0	856.959	0
unassigned CHLAMYDIAE	818.491	372.865	445.626	0	0	0	0	0	0
unassigned CHLAMYDIIA	818.491	372.865	445.626	0	0	0	0	0	0
unassigned TENERICUTES	791.891	85.3515	119.634	178.239	60.8128	0	0	347.854	0
unassigned CHROMATIALES	682.348	0	0	0	682.348	0	0	0	0
unassigned ACTINOBACTERIDAE	644.097	144.115	130.134	0	38.0164	88.9937	242.838	0	0
unassigned THERMOTOGAE	593.221	0	0	445.978	147.243	0	0	0	0
unassigned ROOT	466.036	24.947	372.081	2.62064	7.38008	20.0822	21.3445	11.6842	5.89635
unassigned CORIOBACTERIDAE	439.466	0	0	0	0	0	0	0	439.466
unassigned SPIROCHAETIA	415.253	40.589	37.0353	171.999	68.6752	0	0	96.9544	0
unassigned SPIROCHAETES	414.252	40.589	37.0353	171.999	68.6752	0	0	95.9534	0
unassigned NITROSPIRAE	208.851	31.1168	0	141.927	35.8067	0	0	0	0
unassigned NITROSPIRA	208.341	31.1168	0	141.417	35.8067	0	0	0	0
unassigned NITROSPIRALES	208.341	31.1168	0	141.417	35.8067	0	0	0	0
unassigned SPHINGOBACTERIIA	171.898	32.3303	32.553	0	0	37.2052	69.8098	0	0
unassigned RHODOCYCLALES	144.944	0	0	0	144.944	0	0	0	0
unassigned DEINOCOCCUS THERMUS	90.6139	0	0	0	0	0	0	0	90.6139
unassigned METHANOBACTERIALES	76.889	0	0	43.5296	0	0	0	0	33.3594
unassigned NITROSOPUMILALES	71.0873	71.0873	0	0	0	0	0	0	0
unassigned OPISTHOKONTA	69.758	69.758	0	0	0	0	0	0	0
unassigned METHANOBACTERIA	52.8132	0	0	29.6229	0	0	0	0	23.1903
unassigned CYTOPHAGIA	32.6084	14.2141	18.3943	0	0	0	0	0	0
unassigned UNCLASSIFIED ACTINOBACTERIA	32.3524	0	0	0	0	0	32.3524	0	0
