# Supplementary material for: Metagenomic identification of active methanogens and methanotrophs in serpentinite springs of the Voltri Massif, Italy
Source: PeerJ. 2017 Jan 26;5:e2945. doi: 10.7717/peerj.2945 (PMC5274519; doi:10.7717/peerj.2945)
Supplement: File S7 [file peerj-05-2945-s007.xlsx]

## Sheet: FPKM (normalized to mg size)
Supplemental File 7. Total coverage of predicted pathways.
In this worksheet, values are in FPKM (fragments per kilobase of protein length per million mapped read pairs), which is normalized to the length of the predicted protein and also normalized to the number of read pairs mapped to the pooled assembly.
# Pathway	combined-spring	BR2-spring-2012	BR2-spring-2013	GOR34-spring1-2013b	GOR34-spring3-2012	BR2-river-2012a	BR2-river-2013	GOR34-river-2012a	GOR34-river-2013b	combined_river	BR2 p value	GOR p value	diff
total mapped fragments (read pairs)	37004773	11059078	4948900	14026682	6970113	275619	401065	7476171	19980281	28133136
UNMAPPED	207389	188038	177447	222990	243756	271692	319102	152264	154849	157512	0.160401	0.072196	49877.6
UNINTEGRATED	108552	124367	114422	102007	97999	45901.3	35769.2	92411.7	102695	98929.6	0.000755157	0.789753	9622.77
Transporters;ABC_transporters,_prokaryotic_type;ABC-2_type_and_other_transporters;Cell_division_transporter_[mD:m00256]	415.042	694.833	457.964	273.891	224.692	0	28.9085	128.849	118.263	111.94	0.147832	0.0969935	303.103
Transporters;ABC_transporters,_prokaryotic_type;ABC-2_type_and_other_transporters;Uncharacterized_ABC_transporter_[mD:m00258]	750.162	871.577	1021.21	633.226	843.108	301.645	189.127	450.331	487.277	466.703	0.117677	0.197746	283.459
Utililization_of_sugar,_conversion_of_pentose_to_EMP_pathway_intermediates;Pentose	244.234	331.813	288.126	190.141	182.972	8.8559	0	0	0	0	0.0362473	0.0122307	244.234
Transporters;Major_Facilitator_superfamily_(MFS);Nitrate/nitrite_transporters;Nitrate/nitrite_porter_(nnp)_family_[tc:2.A.1.8]	244.024	29.9142	322.66	326.428	362.074	0	0	0	0	0	0.441146	0.0329311	244.024
Transporters;ABC_transporters,_prokaryotic_type;Monosaccharide_transporters;Putative_phosphonate_transporter_[mD:m00224]	201.474	71.1528	79.4343	165.318	574.169	4.59848	0	54.4535	43.212	45.16	0.0560216	0.368956	156.314
Fermentation;Pyruvate_Fermentation;Pyruvate_fermentation_to_propionate_II_(acrylate_pathway)	145.441	259.268	161.716	79.8868	85.7095	0	0	0	0	0	0.144962	0.0223757	145.441
Embden_Meyerhof-Parnos_(EMP);EMP_modified_pathway	130.957	250.701	116.825	73.5656	73.6733	0	0	0	0	0	0.222386	0.000465664	130.957
Fermentation;Pyruvate_Fermentation;Pyruvate_fermentation_to_acetate_VIII	130.328	261.043	118.941	63.4069	65.6859	0	0	0	0	0	0.227824	0.0112381	130.328
Amino_acid_utilization_biosynthesis_metabolism;Amino_acid_biosynthesis_precursor_pyruvate_and_oxaloacetate;Glutamate	124.224	127.082	104.758	138.67	104.438	0	0	0	0	0	0.0611127	0.0890546	124.224
Fermentation;Pyruvate_Fermentation;Pyruvate_fermentation_to_acetate_V	121.867	205.557	133.35	103.054	89.8537	0	0	0	0	0	0.13364	0.0434938	121.867
Fermentation;Pyruvate_Fermentation;Pyruvate_fermentation_to_acetate_VI	121.867	205.557	133.35	103.054	89.8537	0	0	0	0	0	0.13364	0.0434938	121.867
Fermentation;Homolactic_fermentation	119.738	0	0	77.5909	66.7089	0	0	0	0	0	#DIV/0!	0.0479183	119.738
Transporters;ABC_transporters,_prokaryotic_type;_metallic_cation,_iron-siderophore_and_vitamin_b12_transporters;Zinc_transporter_[mD:m00242]	116.166	257.995	182.485	20.6538	42.1243	6.66329	24.1083	0.165748	0.0310095	0.475036	0.142031	0.211626	115.691
Fermentation;Bifidobacterium_shunt	109.018	167.281	115.374	84.4041	64.5308	0	0	0	0	0	0.11562	0.0844495	109.018
Amino_acid_utilization_biosynthesis_metabolism;Amino_acid_biosynthesis_precursor_pyruvate_and_oxaloacetate;Oxaloacetate_to_lysine	105.974	156.849	130.798	77.2957	65.3406	0	16.9931	0	0	0	0.100405	0.0532338	105.974
Fermentation;Pyruvate_Fermentation;Pyruvate_fermentation_to_acetate_and_alanine	100.704	197.559	96.4125	49.8788	55.8848	0	0	0	0	0	0.210964	0.0361132	100.704
Fermentation;Pyruvate_Fermentation;Pyruvate_fermentation_to_ethanol_III	100.339	195.826	89.5552	55.9208	51.9091	0	0	0	0	0	0.226938	0.0236743	100.339
Amino_acid_utilization_biosynthesis_metabolism;Amino_acid_biosynthesis_precursor_pyruvate_and_oxaloacetate;Pyruvate_to_leucine	97.0366	0	0	40.4892	29.8023	0	0	0	0	0	#DIV/0!	0.0960545	97.0366
Transporters;ABC_transporters,_prokaryotic_type;PEPtide_and_nickel_transporters;PEPtides/nickel_transporter_[mD:m00239]	325.199	333.795	355.428	302.702	335.368	19.3157	14.8075	160.206	261.783	228.794	0.0253904	0.196536	96.4047
Sulfur_compounds_metabolism;Chemoautotrophic_oxidation_of_sulfur_compounds;Sulfide_oxidation_III_or_sulfur_oxidation_I_(sulfur_dioxygenase)	169.237	2.13798	9.1001	277.043	331.159	177.379	77.4983	136.161	61.6145	82.7853	0.263097	0.193394	86.452
Transporters;ABC_transporters,_prokaryotic_type;_metallic_cation,_iron-siderophore_and_vitamin_b12_transporters;Cobalt_transporter_[mD:m00245]	105.437	254.649	108.125	16.7536	61.6051	0	0	2.23068	30.1625	22.0135	0.244374	0.224539	83.4234
Transporters;ABC_transporters,_prokaryotic_type;ABC-2_type_and_other_transporters;ABC-2_type_transporter_[mD:m00254]	592.996	345.877	561.129	779.729	631.931	64.916	280.796	483.381	561.346	512.727	0.000712598	0.351142	80.2687
Sulfur_compounds_metabolism;Sulfur_compounds_cycle;Sulfite_oxidation	79.2584	142.392	88.8561	48.4634	52.1438	0	0	0	0	0	0.144832	0.0232783	79.2584
Sulfur_compounds_metabolism;Sulfur_compounds_cycle;Sulfolactate_degradation	76.0405	155.427	99.2423	30.9336	24.3831	0	0	0	0	0	0.138235	0.0750376	76.0405
Transporters;ABC_transporters,_prokaryotic_type;ABC-2_type_and_other_transporters;Lipopolysaccharide_transporter_[mD:m00250]	201.315	188.955	170.852	183.823	286.224	34.3608	93.4012	76.4952	152.746	127.451	0.204325	0.0688647	73.8641
Saccharide_and_derivated_synthesis;Polysaccharide_biosynthesis_and_assembly_of_cell_surface_structure;Murein	283.073	395.458	344.334	215.849	196.546	82.9714	34.6627	180.036	226.03	209.243	0.00288106	0.938483	73.8309
Fermentation;Pyruvate_Fermentation;Pyruvate_fermentation_to_acetate_II	138.914	267.593	139.657	124.852	108.568	0	0	50.0481	0	68.7732	0.193776	0.115922	70.1408
Fermentation;Pyruvate_Fermentation;Pyruvate_fermentation_to_acetate_and_lactate_II	138.914	267.593	139.657	124.852	108.568	0	0	50.0481	0	68.7732	0.193776	0.115922	70.1408
Methanogenesis;From_acetate	100.861	206.366	122.936	32.6143	59.9418	4.80426	2.65897	38.731	32.557	33.4996	0.157492	0.6399	67.3616
Transporters;ABC_transporters,_prokaryotic_type;Phosphate_and_amino_acid_transporters;Arginine/ornithine_transporter_[mD:m00235]	64.1679	1.68744	5.98134	125.932	80.3209	5.28122	9.07337	0.421612	0.0303329	0.314672	0.0476867	0.137694	63.8532
Methanogenesis;From_dimethylamine	63.1329	136.061	71.1127	13.9738	40.6847	0	0	0	0	0	0.1934	0.28938	63.1329
Methanogenesis;From_methanol	63.1329	136.061	71.1127	14.9353	40.6847	0	0	0	0	0	0.1934	0.27602	63.1329
Methanogenesis;From_methylamine	63.1329	136.061	71.1127	13.9738	40.6847	0	0	0	0	0	0.1934	0.28938	63.1329
Methanogenesis;From_trimethylamine	63.1329	136.061	71.1127	13.9738	40.6847	0	0	0	0	0	0.1934	0.28938	63.1329
Nitrogen_cycle;Nitrogenated_compounds_Reduction;Hydroxylamine_reduction	59.0585	96.7433	63.027	35.761	43.3326	0	0	0	0	0	0.132403	0.0607584	59.0585
Transporters;Phosphotransferase_system_(pts);Enzyme_I_and_hpr;Mannose-specific_II_component_[mD:m00276]	58.7227	162.9	53.8481	2.78252	9.53929	0	0	0	0	0	0.296758	0.319317	58.7227
Nitrogen_cycle;Nitrogenated_compounds_Reduction;Assimilatory_nitrate_reduction;Nitrate_to_ammonia	84.686	7.90821	59.4751	142.517	115.647	0	0	44.3159	20.3895	26.2574	0.415844	0.00968617	58.4286
Gluconeogenesis;Gluconeogenesis	157.235	253.472	184.03	106.953	116.009	28.8559	21.2521	81.3211	119.362	106.86	0.10077	0.582813	50.3744
Nitrogen_cycle;Nitrogenated_compounds_Reduction;Denitrification;Nitrate_to_nitrite	52.0337	13.7336	63.2488	73.657	61.3245	0	0	4.81587	4.06884	4.16949	0.36388	0.0583273	47.8642
Transporters;ABC_transporters,_prokaryotic_type;ABC-2_type_and_other_transporters;Orphan_ABC_Atpase	126.828	198.75	151.726	101.878	45.2474	0	74.3658	91.7749	79.0025	81.5565	0.263693	0.685144	45.2718
Methylotrophy;Formaldehyde_oxidation_(h4mpt_pathway)	42.2548	15.577	90.7458	66.0537	13.853	0	22.1151	0	0	0.459133	0.357915	0.368394	41.7957
Transporters;Major_Facilitator_superfamily_(MFS);Unknown_transporters;Unknown_major_facilitator-1_(UmF1)_[tc:2.A.1.24]	146.437	237.411	98.5473	109.915	109.593	11.173	1.92835	159.098	89.6746	106.103	0.243048	0.744969	40.3335
Hydrogen_metabolism;Hydrogen_oxidation_aerobic	40.105	26.9425	90.3632	30.9074	48.5414	0	0	0	0	0	0.315529	0.139047	40.105
Embden_Meyerhof-Parnos_(EMP);EMP__in_archea	272.018	433.961	326.003	193.489	158.12	0	0	210.749	246.985	232.443	0.0898352	0.377872	39.5752
Fermentation;Acetylene_degradation	37.024	45.3023	48.7846	32.5377	25.3053	0	0	0	0	0	0.0235513	0.079189	37.024
Methanogenesis;From_CO2	35.3023	59.2301	56.9923	16.5371	23.7713	0	0	2.70753	6.44152	0	0.0122562	0.0712153	35.3023
Gluconeogenesis;Gluconeogenesis_in_archea	303.355	486.538	363.105	211.945	178.846	0	44.6129	260.311	278.378	268.19	0.131009	0.212037	35.1653
Fermentation;Glutamate_degradation_V_(via_hydroxyglutarate)	34.8122	43.5201	39.8051	30.2564	26.6187	0	0	0	0	0	0.0283645	0.0406627	34.8122
Embden_Meyerhof-Parnos_(EMP);EMP	330.199	514.245	369.999	261.078	220.163	62.0153	40.5232	293.545	309.232	297.838	0.0991604	0.277472	32.3612
Embden_Meyerhof-Parnos_(EMP);Glycolysis_III_(EMP)	318.521	487.523	354.786	243.839	209.759	57.1594	38.2184	277.454	299.49	286.644	0.0962501	0.271813	31.8775
Methylotrophy;Methanol_oxidation_to_formaldehyde	31.6786	4.61072	96.3926	47.1198	6.49893	0	0	0	0	0	0.469572	0.412746	31.6786
Hydrocarbon_degradation;Hydrocarbon_degradation	30.1411	0.237751	13.0937	54.17	0	0	0	0	0	0	0.488442	0.5	30.1411
Transporters;ABC_transporters,_prokaryotic_type;Oligosaccharide_and_polyol_transporters;Putative_ABC_transporter_[mD:m00211]	29.4235	17.2805	13.3069	43.3544	33.5352	0	0	0	0	0	0.0822419	0.0808619	29.4235
Sulfur_compounds_metabolism;Sulfur_compounds_cycle;Sulfate_reduction_(dissimilatory)	126.882	269.916	155.792	57.4688	86.2034	28.0748	11.1668	108.675	96.7429	98.0212	0.156888	0.370774	28.8604
Amino_acid_utilization_biosynthesis_metabolism;Transamination	442.634	660.69	542.841	322.863	266.534	29.8765	16.4324	342.723	459.092	417.652	0.0572807	0.434571	24.9814
Hydrogen_metabolism;Hydrogen_production	54.3991	93.9562	76.9569	27.2947	37.1003	0	0	63.1955	19.7288	30.8052	0.0631118	0.786903	23.5939
Transporters;ABC_transporters,_prokaryotic_type;Phosphate_and_amino_acid_transporters;Urea_transporter_[mD:m00323]	49.855	8.15483	169.748	49.3694	41.6	6.19718	15.4812	14.5494	32.5712	26.5152	0.491922	0.338483	23.3398
Transporters;Major_Facilitator_superfamily_(MFS);Drug_transporters;Drug:h+_antiporter-3_(12_spanner)_(DhA3)_[tc:2.A.1.21]	26.4309	9.8177	27.5306	23.2196	58.4719	0	0	1.62131	4.13286	3.36603	0.281925	0.25915	23.0649
Nitrogen_cycle;Nitrification_(aerobic_ammonia_oxydation,_bacterial_and_archea);Ammonia_to_hydroxylamine	22.4583	0	0.540476	56.4567	6.27524	0	0	2.44776	0.0324574	0.673526	0.5	0.42674	21.7848
Transporters;ABC_transporters,_prokaryotic_type;ABC-2_type_and_other_transporters;Sodium_transporter_[mD:m00253]	21.2194	0.539611	4.13258	37.8246	32.7466	0	0	0	0	0	0.417341	0.0457297	21.2194
Nitrogen_cycle;Nitrogen_Fixation	17.9601	18.779	24.6755	8.6972	30.6581	0	0	0	0	0	0.08586	0.324025	17.9601
Fermentation;Pyruvate_Fermentation;Pyruvate_fermentation_to_lactate	159.847	244.036	194.688	112.631	100.702	0	0	121.105	157.142	144.311	0.0713076	0.405122	15.5362
Methylotrophy;Formaldehyde_oxidation_(tetrahydrofolate_pathway)	235.378	319.43	303.821	176.296	172.319	0	0	196.766	236.626	220.401	0.0159414	0.303814	14.9776
Transporters;ABC_transporters,_prokaryotic_type;_metallic_cation,_iron-siderophore_and_vitamin_b12_transporters;Putative_ABC_transporter_[mD:m00247]	12.5698	11.2061	40.2058	4.4933	12.0998	0	0	0	0	0	0.326954	0.273637	12.5698
Fermentation;Pyruvate_Fermentation;Pyruvate_fermentation_to_acetate_III	17.2692	1.26643	0.849013	36.3957	17.9923	0	0	0	7.2634	5.1585	0.124025	0.317502	12.1107
Transporters;Major_Facilitator_superfamily_(MFS);Metal_transporters;Nickel_resistance_(nre)_[tc:2.A.1.31]	10.1168	12.2387	9.74684	4.67072	17.9724	0	0	0	0	0	0.0718494	0.338134	10.1168
Transporters;Major_Facilitator_superfamily_(MFS);Organic_acid_transporters;Oxalate:formate_antiporter_(oFA)_family_[tc:2.A.1.11]	9.90649	0.787536	0.639953	12.1926	26.3539	0	0	0	0	0	0.0655849	0.224139	9.90649
Fermentation;Pyruvate_Fermentation;Pyruvate_fermentation_to_acetate_VII	112.738	148.305	133.83	96.2453	74.5221	0	0	74.7647	116.473	103.078	0.0326316	0.801271	9.6602
Methylotrophy;Methylamine_to_formaldehyde	9.40902	3.76875	58.8605	0.209833	1.75919	0	0	0	0	0	0.459294	0.424422	9.40902
Transporters;ABC_transporters,_prokaryotic_type;ABC-2_type_and_other_transporters;Multidrug/hemolysin_transporter_[mD:m00298]	8.75359	0	0.221563	22.9261	1.57313	0	0	0	0	0	0.5	0.456385	8.75359
Fermentation;Pyruvate_Fermentation;Pyruvate_fermentation_to_ethanol_I	8.49339	3.4649	0	11.9448	7.68084	0	0	0	0	0	0.5	0.136199	8.49339
Nitrogen_cycle;Nitrogenated_compounds_Reduction;Dissimilatory_nitrate_reduction;Nitrate_to_ammonia	8.31956	0.0302622	0.350361	16.8156	10.0326	0	0	0	0	0	0.445148	0.157541	8.31956
Transporters;ABC_transporters,_prokaryotic_type;_metallic_cation,_iron-siderophore_and_vitamin_b12_transporters;Manganese/iron_transporter_[mD:m00243]	8.28182	10.7143	8.38952	3.42505	14.7232	0	0	0	0	0	0.0770929	0.354492	8.28182
Hydrogen_metabolism;Hydrogen_production_VII_(chlorophyta,_cyanobacteria)	8.23704	17.6802	22.0823	0	0	0	0	0	0	0	0.0701943	#DIV/0!	8.23704
Amino_acid_utilization_biosynthesis_metabolism;Oxydation_deamination	97.9391	191.919	157.534	64.7606	54.1622	0	0	94.6047	99.2665	89.8474	0.0624401	0.127874	8.09167
Transporters;Major_Facilitator_superfamily_(MFS);Drug_transporters;Fosmidomycin_resistance_(Fsr)_family_[tc:2.A.1.35]	7.25319	9.3294	6.76176	3.5107	11.8393	0	0	0	0	0	0.100735	0.316481	7.25319
Fermentation;Pyruvate_Fermentation;Pyruvate_fermentation_to_ethanol_II	6.41001	4.10136	14.7662	5.67528	5.61854	0	0	0	0	0	0.327525	0.00319868	6.41001
Cellular_response_to_stress;Trehalose_metabolism_in_response_to_cold_stress	6.02707	10.8508	6.61304	1.29623	15.1747	0	0	0	0	0	0.151553	0.445751	6.02707
Nucleic_acid_metabolism;Degradation_of_pyrimidine_bases	5.7403	0.456837	0	3.8485	13.5492	0	0	0	0	0	0.5	0.323816	5.7403
Nitrogen_cycle;Nitrogenated_compounds_Reduction;Denitrification;Nitrite_oxide_to_nitrous_oxide	4.4003	0	22.2756	3.74947	0	0	0	0	0	0	0.5	0.5	4.4003
Transporters;Phosphotransferase_system_(pts);Enzyme_I_and_hpr;N-acetylglucosamine-specific_II_component_[mD:m00267]	3.93135	0.0644042	0.143921	8.79744	2.96341	0	0	0	0	0	0.232129	0.293155	3.93135
Transporters;Major_Facilitator_superfamily_(MFS);Lipid_transporters;Lysophospholipid_transporter_(lplt)_family_[tc:2.A.1.42]	3.11013	0	0	8.14426	0.12231	0	0	0	0	0	#DIV/0!	0.49044	3.11013
Transporters;Phosphotransferase_system_(pts);Enzyme_I_and_hpr;N-acetylmuramic_acid-specific_II_component_[mD:m00303]	3.09287	0	0	8.1595	0	0	0	0	0	0	#DIV/0!	0.5	3.09287
Transporters;Phosphotransferase_system_(pts);Enzyme_I_and_hpr;Trehalose-specific_II_component_[mD:m00270]	2.91444	0	0	7.68879	0	0	0	0	0	0	#DIV/0!	0.5	2.91444
Transporters;ABC_transporters,_prokaryotic_type;_metallic_cation,_iron-siderophore_and_vitamin_b12_transporters;Manganese/iron_transporter_[mD:m00317]	2.42833	0	0	3.99334	4.85594	0	0	0	0	0	#DIV/0!	0.0618603	2.42833
Saccharide_and_derivated_synthesis;Polysaccharide_biosynthesis_and_assembly_of_cell_surface_structure;Peptidoglycan_biosynthesis	56.3381	75.9233	64.4921	45.9529	40.3729	9.93856	5.76793	44.9329	58.8436	53.9111	0.0370221	0.53512	2.42692
Hydrocarbon_degradation;Chlorinated_aromatics_degradation	2.59577	0	0.25708	4.58051	4.38075	0	0	0	0.54092	0.384164	0.5	0.0558551	2.21161
Transporters;Phosphotransferase_system_(pts);Enzyme_I_and_hpr;Cellobiose-specific_II_component_[mD:m00275]	1.88481	0	0	4.85708	0	0	0	0	0	0	#DIV/0!	0.5	1.88481
Transporters;ABC_transporters,_prokaryotic_type;_metallic_cation,_iron-siderophore_and_vitamin_b12_transporters;Manganese/zinc/iron_transporter_[mD:m00319]	2.14893	0.106293	0.25708	0.16761	10.7203	16.1973	1.23679	0.312885	0.846779	0.684533	0.461287	0.509366	1.4644
Methanogenesis;From_formate	51.7689	59.019	85.6587	41.5919	43.7509	3.52987	0	0	0	50.6012	0.134057	0.0161016	1.16771
Hydrolysis_of_polymers;Galactose	38.1094	53.4326	37.7368	29.6542	31.0767	0	7.86858	25.2369	42.4451	37.0845	0.175503	0.735939	1.02485
Transporters;ABC_transporters,_prokaryotic_type;Mineral_and_organic_ion_transporters;Glycine_betaine/proline_transporter_[mD:m00208]	0.982124	0	0	1.95896	1.27194	0	0	0	0	0	#DIV/0!	0.133384	0.982124
Transporters;Phosphotransferase_system_(pts);Enzyme_I_and_hpr;Mannitol-specific_II_component_[mD:m00274]	1.08765	0	0	2.86941	0	11.3381	0	0.0696658	0	0.129592	0.5	0.5	0.95806
Transporters;Major_Facilitator_superfamily_(MFS);Drug_transporters;Acriflavin-sensitivity_(Ynfm)_family_[tc:2.A.1.36]	0.532484	0	3.98158	0	0	0	0	0	0	0	0.5	#DIV/0!	0.532484
Homoacetogenesis;Acetate_formation_from_acetyl-coA_II	0.529873	1.26643	0.849013	0.0998497	0	0	0	0	0	0	0.124025	0.5	0.529873
Transporters;ABC_transporters,_prokaryotic_type;Monosaccharide_transporters;Methyl-galactoside_transporter_[mD:m00214]	0.528921	0	0	1.39538	0	0	0	0	0	0	#DIV/0!	0.5	0.528921
Carbohydrate_Active_enzyme_-_CAZy;Glycosyltransferase	25.2121	40.3241	29.5244	16.8265	15.0484	6.55978	2.95417	22.7348	26.1325	24.7074	0.0755509	0.188226	0.50475
Nitrogen_cycle;Nitrogenated_compounds_Reduction;Denitrification;Nitrous_oxide_to_nitrogen	0.368067	0	0	0.971022	0	0	0	0	0	0	#DIV/0!	0.5	0.368067
Transporters;Phosphotransferase_system_(pts);Enzyme_I_and_hpr;Sucrose-specific_II_component_[mD:m00269]	0.350773	0	0	0.925398	0	0	0	0	0	0	#DIV/0!	0.5	0.350773
Superpathway_of_thiosulfate_metabolism_(Desulfovibrio_sulfodismutans)	134.985	233.291	154.764	100.411	98.915	56.3151	21.4456	101.808	152.191	134.688	0.0889869	0.483318	0.297147
Transporters;Phosphotransferase_system_(pts);Enzyme_I_and_hpr;Fructose-specific_II_component_[mD:m00273]	0.237049	0	0	0.625375	0	0	0	0	0	0	#DIV/0!	0.5	0.237049
Transporters;ABC_transporters,_prokaryotic_type;Phosphate_and_amino_acid_transporters;Putative_glutamine_transporter_[mD:m00228]	0.163779	0	0	0.432077	0	0	0	0	0	0	#DIV/0!	0.5	0.163779
Transporters;ABC_transporters,_prokaryotic_type;Phosphate_and_amino_acid_transporters;Neutral_amino_acid_transporter_[mD:m00322]	0.153325	0	0.0955391	0	0.746178	0	0	0	0	0	0.5	0.5	0.153325
Fermentation;Pyruvate_Fermentation;Superpathway_of_clostridium_acetobutylicum_acidogenic_and_solventogenic_fermentation	0	0	0	0	0	0	0	0	0	0	#DIV/0!	#DIV/0!	0
Homoacetogenesis;Glycolysis	0	0	0	0	0	0	0	60.0862	0	0	#DIV/0!	0.5	0
Homoacetogenesis;Reductive_acetyl_coenzyme_A_pathway	0	0	128.393	0	0	0	0	0	0	0	0.5	#DIV/0!	0
Saccharide_and_derivated_synthesis;Disaccaride_phosphorylase;Lactose	0	0	0	0	0	0	0	0	0	0	#DIV/0!	#DIV/0!	0
Transporters;ABC_transporters,_prokaryotic_type;Phosphate_and_amino_acid_transporters;Arginine_transporter_[mD:m00229]	0	0	0	0	0	8.19376	0	0	0	0.0802739	0.5	#DIV/0!	-0.0802739
Transporters;Major_Facilitator_superfamily_(MFS);Sugar_transporters;Sugar_porter_(sp)_family_[tc:2.A.1.1]	0	0	0	0	0	0	0	0.0154491	0.115614	0.0862151	#DIV/0!	0.415432	-0.0862151
Transporters;Major_Facilitator_superfamily_(MFS);Phosphate_and_organophosphate_transporters;Organophosphate:pi_antiporter_(opA)_family_[tc:2.A.1.4]	0	0	0	0	0	8.52613	1.35215	0	0	0.102806	0.399873	#DIV/0!	-0.102806
Fermentation;Lysine_fermentation_to_acetate_and_butyrate	116.634	147.446	150.841	109.795	83.0793	0	0	107.519	132.314	117.205	0.00724551	0.529404	-0.571089
Hydrolysis_of_polymers;Cellulose	0.939867	0	0	2.10697	0.749747	0	0	0.759374	2.15135	1.7297	#DIV/0!	0.987494	-0.78983
Hydrocarbon_degradation;Polycyclic_aromatic_hydrocarbon_degradation	24.8147	24.7987	21.4664	23.3154	30.2348	16.7859	6.59598	31.9509	25.0283	26.5244	0.185361	0.845406	-1.70968
Transporters;Major_Facilitator_superfamily_(MFS);Organic_acid_transporters;Metabolite:h+_symporter_(mhs)_family_[tc:2.A.1.6]	0	0	0	0	0	1.8838	7.76748	0	2.66982	2.02531	0.348529	0.5	-2.02531
Transporters;ABC_transporters,_prokaryotic_type;Monosaccharide_transporters;Rhamnose_transporter_[mD:m00220]	1.22637	0.642495	0.133641	1.74834	1.8782	0	0.816425	0	4.93007	3.50136	0.980652	0.831192	-2.27499
Methylotrophy;RuMP_pathway_for_formaldehyde_fixation_(first_two_steps_are_common_to_both_RuMP_pathway_variants)	178.336	175.483	120.298	199.415	189.817	0	0	186.416	184.576	180.756	0.117427	0.25604	-2.41998
Transporters;ABC_transporters,_prokaryotic_type;Monosaccharide_transporters;Phosphate_transporter_[mD:m00222]	390.522	468.889	311.331	405.264	359.736	187.173	91.0413	306.54	435.033	393.375	0.0775131	0.914812	-2.85307
Transporters;ABC_transporters,_prokaryotic_type;Oligosaccharide_and_polyol_transporters;Sorbitol/mannitol_transporter_[mD:m00200]	2.27674	0	7.56972	2.06283	2.56149	1.39011	2.86593	0.130686	7.3626	5.31816	0.682934	0.743574	-3.04141
Fermentation;Acetoin_biosynthesis;(s,s)-butanediol_biosynthesis	0	0	0	0	0	44.0672	33.6486	0.361021	3.71486	3.64567	0.0848393	0.438325	-3.64567
Fermentation;Acetoin_biosynthesis;Acetoin_biosynthesis_III	0	0	0	0	0	44.0672	33.6486	0.361021	3.71486	3.64567	0.0848393	0.438325	-3.64567
Fermentation;Acetoin_biosynthesis;Meso-butanediol_biosynthesis_I	0	0	0	0	0	44.0672	33.6486	0.361021	3.71486	3.64567	0.0848393	0.438325	-3.64567
Transporters;ABC_transporters,_prokaryotic_type;Mineral_and_organic_ion_transporters;Putrescine_transporter_[mD:m00300]	33.8269	3.85627	71.0258	39.9918	47.2929	0	0	67.2924	27.8546	37.6	0.465469	0.893902	-3.77305
Hydrolysis_of_polymers;Mannose	18.4965	21.8494	20.8202	15.7433	17.0675	5.41579	2.99436	18.7225	26.0462	23.5692	0.0258561	0.296044	-5.07269
Transporters;ABC_transporters,_prokaryotic_type;PEPtide_and_nickel_transporters;DiPEPtide_transporter_[mD:m00324]	0	0	0	0	0	0	0	18.7064	0.480842	5.31258	#DIV/0!	0.48364	-5.31258
Carbohydrate_Active_enzyme_-_CAZy;Glycoside_hydrolase	15.7928	20.6418	17.0747	15.2033	8.37528	1.68908	1.35657	26.8353	20.2378	21.5402	0.0592208	0.00624816	-5.74736
Sulfur_compounds_metabolism;Chemoautotrophic_oxidation_of_sulfur_compounds;Superpathway_of_sulfur_metabolism_(Desulfocapsa_sulfoexigens)	92.1213	177.871	107.347	56.2985	54.7908	28.0748	11.1668	108.675	96.7429	98.0212	0.136629	0.0700724	-5.89986
Transporters;Major_Facilitator_superfamily_(MFS);Sugar_transporters;Purine_transporter_(AzgA)_family_[tc:2.A.1.40]	10.7697	1.64033	0.916395	22.5092	8.62597	0	0	1.9816	25.5471	18.6702	0.175661	0.938878	-7.90056
Amino_acid_utilization_biosynthesis_metabolism;Arginine_and_proline_metabolism	74.4631	118.435	101.859	47.4882	39.6144	13.2456	12.9561	81.1548	85.3146	82.4716	0.0532958	0.0957953	-8.00843
Transporters;ABC_transporters,_prokaryotic_type;Oligosaccharide_and_polyol_transporters;Trehalose/maltose_transporter_[mD:m00204]	0	0	0	0	0	0	0	0	12.2136	8.67413	#DIV/0!	0.5	-8.67413
Transporters;Major_Facilitator_superfamily_(MFS);Drug_transporters;Drug:h+_antiporter-2_(14_spanner)_(DhA2)_family_[tc:2.A.1.3]	1.73133	0.0435566	5.87248	1.71032	1.51125	0	3.20278	0.502367	15.0635	10.8773	0.489614	0.556594	-9.14596
Hydrolysis_of_polymers;Starch	39.1222	52.1779	41.2309	34.2462	26.7228	13.7741	6.63315	51.9801	50.5399	49.9365	0.0331603	0.0925472	-10.8143
Nucleic_acid_metabolism;Pyrimidine_metabolism	142.092	187.36	158.87	121.022	100.756	69.7083	33.7196	142.62	160.705	153.197	0.0196526	0.279858	-11.1053
Transporters;ABC_transporters,_prokaryotic_type;Mineral_and_organic_ion_transporters;Thiamine_transporter_[mD:m00191]	0.2949	0	0	0.518664	0.521881	0	0	8.06231	13.9426	12.0446	#DIV/0!	0.174	-11.7497
Cellular_response_to_stress;Regulation_of_stress-activated_protein_kinase_signaling_cascade	540.939	980.297	640.384	300.098	257.895	36.3951	57.4358	687.882	519.768	553.117	0.147786	0.121874	-12.1779
Transporters;ABC_transporters,_prokaryotic_type;Phosphate_and_amino_acid_transporters;Cystine_transporter_[mD:m00234]	0	0	0	0	0	0	0	0.0807719	17.6503	12.5568	#DIV/0!	0.497087	-12.5568
Transporters;Major_Facilitator_superfamily_(MFS);Organic_acid_transporters;Anion:cation_symporter_(Acs)_family_[tc:2.A.1.14]	0.020426	0	0	0.0538871	0	2.29342	0	13.7318	13.5186	13.2726	0.5	0.00372872	-13.2521
Nucleic_acid_metabolism;Purine_metabolism	106.53	140.539	121.672	87.818	79.4762	36.0473	22.5326	106.988	127.773	119.85	0.0167306	0.259457	-13.32
Saccharide_and_derivated_synthesis;Polysaccharide_biosynthesis_and_assembly_of_cell_surface_structure;N-glycan_biosynthesis	0	0	0	0	0	0	1.16892	10.7924	16.1129	14.3486	0.5	0.124287	-14.3486
Cellular_response_to_stress;Cellular_response_to_osmotic_stress	19.497	16.3444	30.5328	20.7562	14.1292	0	2.00275	29.6212	37.6217	34.6374	0.168803	0.270285	-15.1405
Cellular_response_to_stress;Response_to_osmotic_stress	15.5129	14.041	21.4634	15.6935	13.2597	6.14216	3.95477	27.1767	33.3476	31.0222	0.2302	0.169397	-15.5093
Transporters;Major_Facilitator_superfamily_(MFS);Organic_acid_transporters;Cyanate_porter_(cp)_family_[tc:2.A.1.17]	0	0	0	0	0	0	0	6.0549	20.0609	15.8564	#DIV/0!	0.313387	-15.8564
Transporters;ABC_transporters,_prokaryotic_type;Monosaccharide_transporters;Fructose_transporter_[mD:m00218]	1.12477	0	0	2.03069	1.88491	63.6965	57.0963	18.1237	15.4096	17.1982	0.0347506	0.0550681	-16.0734
Methylotrophy;Methane_oxidation_to_cO2	63.7897	31.1302	129.974	75.8696	57.0602	1.05322	1.84432	68.4974	86.7834	79.8733	0.353218	0.654777	-16.0835
Hydrocarbon_degradation;Other_aromatics_degradation	25.5127	7.8967	19.4406	40.2574	28.1018	17.4505	3.62373	45.2918	41.4239	41.678	0.845924	0.269981	-16.1654
Sulfur_compounds_metabolism;Sulfur_compounds_cycle;Sulfoacetaldehyde_degradation	0	0	0	0	0	0	0.684613	0	7.35142	16.6834	0.5	0.5	-16.6834
Fermentation;Heterolactic_fermentation	91.8046	0	0	86.7375	0	0	0	113.667	110.273	108.76	#DIV/0!	0.347516	-16.9552
Saccharide_and_derivated_synthesis;Polysaccharide_biosynthesis_and_assembly_of_cell_surface_structure;Lipopolysaccharide_biosynthesis	31.5218	41.5366	40.6671	25.0308	22.2012	8.88691	3.97861	44.14	51.5821	48.5075	0.0370399	0.132891	-16.9856
Fatty_acid_oxidation;Fatty_acid_beta-oxidation_III_(unsaturated)	162.914	254.77	205.326	118.316	76.8107	0	0	179.035	186.358	180.117	0.0681517	0.177795	-17.2024
Transporters;ABC_transporters,_prokaryotic_type;Monosaccharide_transporters;D-Xylose_transporter_[mD:m00215]	1.8347	0	0	3.19858	3.30367	20.2128	27.089	1.23169	27.1792	20.0348	0.0919011	0.552327	-18.2001
Transporters;Major_Facilitator_superfamily_(MFS);Drug_transporters;Drug:h+_antiporter-1_(12_spanner)_(DhA1)_family_[tc:2.A.1.2]	3.9657	0.102608	5.4985	6.30583	4.29747	0.32775	2.70618	25.0964	22.0049	22.3389	0.551219	0.0188873	-18.3732
Transporters;Major_Facilitator_superfamily_(MFS);Sugar_transporters;Fucose:h+_symporter_(Fhs)_family_[tc:2.A.1.7]	5.61518	0.0363146	0.237981	9.96123	9.53875	1.47129	5.05548	35.3226	20.8492	24.2804	0.315699	0.23294	-18.6652
Transporters;ABC_transporters,_prokaryotic_type;Mineral_and_organic_ion_transporters;Putative_spermidine/putrescine_transporter_[mD:m00193]	34.6128	28.2474	20.4282	41.8001	40.3197	0	17.5614	4.45102	73.3159	53.4336	0.435611	0.960656	-18.8208
Fermentation;Mixed_acid_fermentation	46.3497	56.7021	52.7717	40.3964	37.3447	7.99795	0	0	68.8376	65.2744	0.0255042	0.921554	-18.9247
Hydrolysis_of_polymers;Arabinose	5.78648	0	0	12.1525	6.26497	0	0	6.42911	33.2925	25.353	#DIV/0!	0.63285	-19.5665
Amino_acid_utilization_biosynthesis_metabolism;Cysteine_and_methionine_metabolism	113.905	138.383	137.672	100.101	87.5785	33.0868	16.0237	124.136	144.015	135.821	0.0457923	0.243693	-21.9165
Transporters;ABC_transporters,_prokaryotic_type;Oligosaccharide_and_polyol_transporters;Sn-glycerol_3-phosphate_transporter_[mD:m00198]	42.944	1.68853	12.4397	64.5233	87.0357	192.503	82.5922	61.2986	66.0692	64.9319	0.275713	0.402846	-21.9879
Cellular_response_to_stress;Cellular_response_to_stress	36.1053	38.1554	46.2333	34.455	28.9827	15.1711	8.24725	56.5294	60.8704	58.5189	0.153589	0.114522	-22.4136
Transporters;ABC_transporters,_prokaryotic_type;Phosphate_and_amino_acid_transporters;Polar_amino_acid_transporter_[mD:m00236]	29.2122	14.2211	14.7099	37.0415	47.5389	282.079	109.213	40.3786	52.1186	52.0657	0.284073	0.0991136	-22.8535
Transporters;ABC_transporters,_prokaryotic_type;Monosaccharide_transporters;Phosphonate_transporter_[mD:m00223]	245.158	197.743	131.951	194.775	502.16	122.698	74.8125	259.087	279.388	268.53	0.085716	0.67892	-23.3711
Transporters;ABC_transporters,_prokaryotic_type;Monosaccharide_transporters;Putative_multiple_sugar_transporter_[mD:m00216]	8.6148	0.0293773	0	19.587	6.27292	1.46772	6.05185	18.5974	38.1142	32.1117	0.351451	0.51978	-23.4969
Transporters;ABC_transporters,_prokaryotic_type;Monosaccharide_transporters;Ribose_transporter_[mD:m00212]	34.5254	9.96913	11.6503	56.2797	45.9508	0	26.0362	38.1571	67.6959	58.5891	0.885791	0.942313	-24.0637
Transporters;ABC_transporters,_prokaryotic_type;_metallic_cation,_iron-siderophore_and_vitamin_b12_transporters;Zinc/manganese_transporter_[mD:m00244]	8.08406	1.88871	23.6519	4.59725	13.8773	0	0	19.5743	40.6283	32.1988	0.449271	0.175076	-24.1147
Hydrocarbon_degradation;BTEX_and_related_aromatics_degradation	0	0	0	0	0	0	0	23.0436	26.006	24.5933	#DIV/0!	0.0384034	-24.5933
Transporters;ABC_transporters,_prokaryotic_type;ABC-2_type_and_other_transporters;Teichoic_acid_transporter_[mD:m00251]	0.154926	0.222171	0.330983	0.116778	0	0	0	2.13045	35.7308	25.8893	0.123652	0.46416	-25.7343
Amino_acid_utilization_biosynthesis_metabolism;Amino_acid_biosynthesis_precursor_pyruvate_and_oxaloacetate;Cysteine_and_methionine	120.055	182.52	149.025	83.8495	73.2352	30.567	19.2723	142.198	152.159	146.427	0.0500672	0.0947173	-26.3717
Transporters;Phosphotransferase_system_(pts);Enzyme_I_and_hpr;Ascorbate-specific_II_component_[mD:m00283]	77.489	7.54241	55.3224	113.859	131.017	0	0	87.1771	112.351	104.532	0.413738	0.111383	-27.0425
Carbohydrate_Active_enzyme_-_CAZy;Polysaccharide_lyase	26.59	0	43.1479	20.1918	13.9539	15.3599	9.08225	0	0	53.641	0.769669	0.115032	-27.051
Transporters;ABC_transporters,_prokaryotic_type;Oligosaccharide_and_polyol_transporters;Maltose/maltodextrin_transporter_[mD:m00194]	5.17269	4.82681	3.4202	5.66607	5.9729	29.3598	23.3273	36.8577	34.7137	34.275	0.0660307	0.0260197	-29.1023
Transporters;ABC_transporters,_prokaryotic_type;Oligosaccharide_and_polyol_transporters;Alpha-glucoside_transporter_[mD:m00201]	7.49545	9.67156	7.01882	4.10071	11.5351	1.81591	13.7272	17.5724	44.8156	36.7114	0.949955	0.255136	-29.216
Transporters;Major_Facilitator_superfamily_(MFS);Sugar_transporters;Nucleoside:h+_symporter_(nhs)_family_[tc:2.A.1.10]	0	0	0	0	0	0	0	100.078	6.36119	31.1128	#DIV/0!	0.459589	-31.1128
Transporters;ABC_transporters,_prokaryotic_type;ABC-2_type_and_other_transporters;Heme_transporter_[mD:m00259]	122.239	165.277	151.075	104.827	87.7732	12.3766	3.84778	137.952	164.667	153.783	0.0120324	0.241047	-31.5442
Transporters;Phosphotransferase_system_(pts);Enzyme_I_and_hpr;Phosphocarrier_protein_hpr	93.5907	58.8232	88.1915	119.098	101.257	89.9446	33.3285	100.433	137.637	125.796	0.828493	0.801781	-32.2053
Cellular_response_to_stress;Cellular_response_to_oxidative_stress	89.8862	106.541	100.61	84.6351	66.414	0	11.8856	110.916	130.118	122.274	0.0579257	0.250903	-32.3881
Transporters;ABC_transporters,_prokaryotic_type;Mineral_and_organic_ion_transporters;Putative_thiamine_transporter_[mD:m00192]	0	0	0	0	0	0	0	50.4246	29.5976	34.4203	#DIV/0!	0.162094	-34.4203
Homoacetogenesis;Acetate_formation_from_acetyl-coA_I	135.837	249.072	174.257	189.532	140.603	8.92545	62.6781	148.769	182.686	170.26	0.2231	0.989861	-34.4225
Saccharide_and_derivated_synthesis;Disaccaride_phosphorylase;Cellobiose	23.6162	12.6249	14.6623	38.299	17.8651	0	0	111.063	42.4749	59.7261	0.0474468	0.292376	-36.1099
Nitrogen_cycle;Ammonia_assimilation	114.269	129.388	208.957	88.9894	86.3857	42.1425	0	149.363	163.217	150.893	0.248201	0.0759982	-36.6247
Hydrocarbon_degradation;Nitoaromatics_degradation	0	0	0	0	0	58.5193	23.8314	88.6392	23.3145	37.8069	0.253799	0.336261	-37.8069
Hydrolysis_of_polymers;Xylose	33.9781	35.7482	33.2778	35.2808	29.0453	20.23	20.5411	67.8295	75.4897	72.1293	0.0624733	0.110854	-38.1512
Transporters;ABC_transporters,_prokaryotic_type;Mineral_and_organic_ion_transporters;Sulfate_transporter_[mD:m00185]	93.579	4.39494	98.9891	158.919	101.499	7.84996	0	152.963	128.975	132.267	0.522211	0.635889	-38.6876
Nucleic_acid_metabolism;Degradation_of_purine_bases	23.528	6.7757	16.4549	35.7774	30.479	23.3017	8.85624	74.3164	60.1225	62.8028	0.774366	0.0825905	-39.2749
Amino_acid_utilization_biosynthesis_metabolism;Amino_acid_biosynthesis_precursor_pyruvate_and_oxaloacetate;PEP	62.1442	87.4927	81.8994	45.8662	40.6563	24.3774	17.3668	93.4754	109.164	102.856	0.00706849	0.113366	-40.7117
Methylotrophy;Serine_pathway_for_formaldehyde_fixation	220.714	308.801	313.209	158.902	148.573	0	0	234.725	280.255	262.565	0.00451196	0.167405	-41.8509
Transporters;ABC_transporters,_prokaryotic_type;Phosphate_and_amino_acid_transporters;General_l-amino_acid_transporter_[mD:m00232]	4.65738	0	24.9466	3.52478	2.84941	0	1.06281	25.3277	59.1862	46.6676	0.5	0.264923	-42.0102
Amino_acid_utilization_biosynthesis_metabolism;Amino_acid_biosynthesis_precursor_pyruvate_and_oxaloacetate;Histidine	77.0224	102.455	0	62.9445	53.9845	33.361	16.6915	106.841	128.937	120.529	0.650902	0.162715	-43.5065
Fermentation;Pyruvate_Fermentation;Pyruvate_fermentation_to_acetate_and_lactate_I	80.727	0	0	57.4407	57.2407	0	0	0	137.916	126.182	#DIV/0!	0.893896	-45.4551
Transporters;ABC_transporters,_prokaryotic_type;ABC-2_type_and_other_transporters;Lipooligosaccharide_transporter_[mD:m00252]	74.9874	211.184	71.7955	10.0398	32.0726	0	0	163.921	114.459	120.965	0.291374	0.187064	-45.9775
Amino_acid_utilization_biosynthesis_metabolism;D-glutamine_and_D-glutamate_metabolism	247.273	310.595	273.741	221.289	182.326	33.5293	33.4832	248.667	325.34	297.945	0.0452198	0.379585	-50.6719
Transporters;ABC_transporters,_prokaryotic_type;Oligosaccharide_and_polyol_transporters;Putative_ABC_transporter_[mD:m00210]	322.491	320.718	367.425	348.641	288.013	120.815	51.5249	331.74	416.414	373.861	0.140825	0.583317	-51.37
Carbohydrate_Active_enzyme_-_CAZy;Carbohydrate_esterase	0	0	0	0	0	0	0	47.4441	55.9664	52.4858	#DIV/0!	0.0523472	-52.4858
Transporters;ABC_transporters,_prokaryotic_type;Oligosaccharide_and_polyol_transporters;Multiple_sugar_transporter_[mD:m00207]	65.1874	36.9585	34.8828	89.7634	86.9041	150.738	78.5221	74.2607	135.369	117.901	0.266846	0.697091	-52.7134
Utililization_of_sugar,_conversion_of_pentose_to_EMP_pathway_intermediates;Hexose	28.8845	0	0	54.2632	26.8944	0	0	87.1419	83.1138	82.1851	#DIV/0!	0.163107	-53.3006
Sulfur_compounds_metabolism;Sulfur_compounds_cycle;Sulfur_disproportionation	76.8377	128.697	97.8996	67.0608	49.2035	34.2488	14.0138	144.783	128.976	130.425	0.0376605	0.00828576	-53.5869
Amino_acid_utilization_biosynthesis_metabolism;Methionine_degradation	110.239	71.0201	85.6471	133.729	142.654	72.3487	0	153.308	175.174	165.117	0.509875	0.154982	-54.8786
Transporters;ABC_transporters,_prokaryotic_type;Mineral_and_organic_ion_transporters;Spermidine/putrescine_transporter_[mD:m00299]	3.60258	0	0	6.62233	5.79955	0	1.12924	12.8271	81.8895	59.8561	0.5	0.448201	-56.2536
Transporters;ABC_transporters,_prokaryotic_type;Oligosaccharide_and_polyol_transporters;Multiple_sugar_transporter_[mD:m00196]	11.6101	0	0	30.4669	6.2152	0	30.2605	47.4364	77.9932	68.3178	0.5	0.352206	-56.7076
Amino_acid_utilization_biosynthesis_metabolism;Phenylalanine_metabolism	47.8339	66.3969	70.4885	35.3353	27.448	16.466	10.5811	88.8445	115.739	106.12	0.0576653	0.153131	-58.2862
Sulfur_compounds_metabolism;Sulfur_compounds_cycle;Thiosulfate_disproportionation	84.6949	144.184	98.936	60.5243	58.793	23.2661	0	142.065	153.795	147.334	0.0634404	0.0484477	-62.6387
Amino_acid_utilization_biosynthesis_metabolism;Alanine,_aspartate_and_glutamate_metabolism_(contain_asparagin_as_well)	114.832	157.032	153.573	86.9521	80.7141	37.1672	25.2581	161.49	188.67	177.62	0.0216696	0.115301	-62.7886
Amino_acid_utilization_biosynthesis_metabolism;Phenylalanine,_tyrosine_and_tryptophan_biosynthesis	110.222	171.957	136.656	70.1873	74.9531	31.5438	14.1196	165.727	181.346	173.344	0.0432142	0.0341836	-63.122
Sulfur_compounds_metabolism;Sulfur_compounds_cycle;Sulfate_reduction_(assimilatory)	76.9148	95.0512	115.685	77.7603	45.9571	50.0727	24.3852	177.528	135.331	140.973	0.20859	0.0349494	-64.0583
Hydrocarbon_degradation;Aromatic_carboxylic_acid_degradation	33.6356	24.8866	40.4718	37.3551	35.1781	33.5637	10.5545	109.122	97.7706	98.9148	0.679712	0.0434035	-65.2792
Amino_acid_utilization_biosynthesis_metabolism;Lysine_biosynthesis	144.897	219.461	186.741	99.3894	89.0083	65.6139	34.4922	198.26	222.668	211.894	0.00332461	0.0945432	-66.9971
Fatty_acid_oxidation;Fatty_acid_omega-oxidation	44.2954	0.319689	12.9133	81.2404	62.0029	0	0	87.5193	124.055	111.51	0.484243	0.435801	-67.2142
Amino_acid_utilization_biosynthesis_metabolism;Glycine,_serine_and_threonine_metabolism	80.9068	103.054	95.0616	66.9085	64.9731	28.6788	20.3129	135.738	158.455	148.925	0.00159478	0.0959561	-68.0186
Transporters;ABC_transporters,_prokaryotic_type;Mineral_and_organic_ion_transporters;Osmoprotectant_transporter_[mD:m00209]	6.79062	2.30472	4.536	1.25242	26.6541	0	1.64253	53.9034	85.8111	75.2913	0.0717982	0.0370031	-68.5007
Transporters;Phosphotransferase_system_(pts);Enzyme_I_and_hpr;Nitrogen_regulatory_II_component	142.023	106.566	103.762	164.459	180.296	136.545	4.74926	171.197	230.643	210.703	0.687166	0.415301	-68.6801
Transporters;ABC_transporters,_prokaryotic_type;PEPtide_and_nickel_transporters;Microcin_c_transporter_[mD:m00349]	139.338	192.15	114.401	110.919	169.677	0	1.82781	190.084	221.82	208.067	0.162619	0.129206	-68.7297
Amino_acid_utilization_biosynthesis_metabolism;Tryptophan_metabolism	32.4431	22.2542	39.5746	36.493	35.396	21.9423	8.10077	97.2484	108.922	103.531	0.493691	0.0603645	-71.0875
Cellular_response_to_stress;Response_to_nitrosative_stress	78.9175	92.4619	98.0606	73.831	54.0715	50.1774	26.821	152.372	160.447	155.316	0.158984	0.0951127	-76.3986
Transporters;ABC_transporters,_prokaryotic_type;Mineral_and_organic_ion_transporters;Iron(III)_transporter_[mD:m00190]	226.989	306.527	216.412	182.038	198.762	281.72	111.187	204.34	350.189	305.204	0.352605	0.406909	-78.2146
Cellular_response_to_stress;Response_to_oxidative_stress	99.1143	99.6571	126.618	98.9814	78.9925	17.1825	9.30634	157.197	200.44	184.429	0.109902	0.215439	-85.3143
Transporters;ABC_transporters,_prokaryotic_type;Monosaccharide_transporters;Simple_sugar_transporter_[mD:m00221]	79.4498	38.0841	97.0753	88.1601	115.413	104.252	54.1706	226.549	160.596	168.318	0.866225	0.299094	-88.8679
Fatty_acid_oxidation;Fatty_acid_beta-oxidation_I	97.383	130.841	142.44	72.3663	62.7004	37.9674	17.5944	172.785	197.297	186.66	0.0928222	0.0919391	-89.2774
Fatty_acid_oxidation;Fatty_acid_activation	129.567	190.363	170.72	97.3452	81.558	0	0	183.833	252.641	228.977	0.0345968	0.202023	-99.4105
Transporters;ABC_transporters,_prokaryotic_type;ABC-2_type_and_other_transporters;Lipoprotein-releasing_transporter_[mD:m00255]	190.868	246.473	236.334	158.018	136.469	0	25.9391	301.295	299.462	293.116	0.0501691	0.040924	-102.248
Fatty_acid_oxidation;Fatty_acid_beta-oxidation_IV_(unsaturated)	125.003	178.053	171.661	90.2092	90.9946	0	0	160.488	259.756	227.934	0.0116353	0.248792	-102.931
Methylotrophy;Formaldehyde_oxidation_(glutathione-dependent)	108.662	31.0805	184.629	133.869	127.09	0	0	181.235	234.84	214.777	0.393826	0.236334	-106.115
Amino_acid_utilization_biosynthesis_metabolism;Valine,_leucine_and_isoleucine_degradation	60.9996	56.3415	63.5833	60.4991	67.8123	20.4985	14.3092	165.825	174.616	168.463	0.0996345	0.00443699	-107.463
TCA_cycle;TCA_cycle	132.122	214.284	156.767	107.376	104.313	52.825	25.0355	227.057	261.076	243.858	0.0643297	0.0848862	-111.736
Transporters;ABC_transporters,_prokaryotic_type;Mineral_and_organic_ion_transporters;Sulfonate/nitrate/taurine_transporter_[mD:m00188]	158.268	124.455	291.365	150.779	132.485	252.396	118.411	254.66	287.297	271.414	0.905465	0.123756	-113.146
Transporters;ABC_transporters,_prokaryotic_type;ABC-2_type_and_other_transporters;Capsular_polysaccharide_transporter_[mD:m00249]	19.4501	0	1.63253	47.6925	7.12026	11.2677	5.0667	8.05984	186.735	134.034	0.311665	0.638257	-114.584
Transporters;Major_Facilitator_superfamily_(MFS);Organic_acid_transporters;Phenylproprionate_permease_(ppp)_[tc:2.A.1.27]	14.0296	3.36641	70.5041	8.86573	1.24216	0	2.1476	120.798	136.864	129.333	0.468673	0.0607354	-115.304
Transporters;Phosphotransferase_system_(pts);Enzyme_I_and_hpr;Enzyme_I	51.6098	91.1231	108.892	13.7674	24.3992	46.2935	15.0192	124.736	194.594	172.017	0.216365	0.132169	-120.407
Transporters;ABC_transporters,_prokaryotic_type;Mineral_and_organic_ion_transporters;Putative_tungstate_transporter_[mD:m00186]	86.542	139.906	97.8572	59.4401	63.7313	130.371	48.7156	181.63	229.028	211.649	0.377989	0.0947496	-125.107
TCA_cycle;Reductive_TCA_cycle	155.825	214.329	185.273	123.762	135.075	67.3745	25.1918	257.94	299.792	282.444	0.0272007	0.0648212	-126.619
Amino_acid_utilization_biosynthesis_metabolism;Methionine_biosynthesis	105.657	123.635	138.356	89.9988	87.8927	106.169	37.231	269.183	251.389	251.642	0.391116	0.0291251	-145.984
Transporters;ABC_transporters,_prokaryotic_type;_metallic_cation,_iron-siderophore_and_vitamin_b12_transporters;Iron_complex_transporter_[mD:m00240]	288.126	467.679	308.661	174.881	216.551	72.8565	32.1817	388.756	493.874	454.963	0.111088	0.0817801	-166.837
Transporters;ABC_transporters,_prokaryotic_type;Mineral_and_organic_ion_transporters;Molybdate_transporter_[mD:m00189]	59.542	68.9481	137.28	42.3883	33.7679	88.0561	35.3065	252.136	226.498	229.229	0.617924	0.0269025	-169.687
Amino_acid_utilization_biosynthesis_metabolism;Valine,_leucine_and_isoleucine_biosynthesis	186.871	267.257	230.983	135.031	133.167	90.9652	53.3315	310.34	399.704	367.612	0.00244545	0.129623	-180.74
Fermentation;Acetoin_biosynthesis;(R)-acetoin_biosynthesis_I	284.105	341.791	295.684	266.993	218.794	314.387	154.676	387.51	531.2	485.524	0.377798	0.265608	-201.418
Fermentation;Acetoin_biosynthesis;(s)-acetoin_biosynthesis	284.105	341.791	295.684	266.993	218.794	314.387	154.676	387.51	531.2	485.524	0.377798	0.265608	-201.418
Fermentation;Acetoin_biosynthesis;Meso-butanediol_biosynthesis_II	284.105	341.791	295.684	266.993	218.794	314.387	154.676	387.51	531.2	485.524	0.377798	0.265608	-201.418
Amino_acid_utilization_biosynthesis_metabolism;Histidine_biosynthesis,_pRpp_=>_histidine	176.618	296.692	234.765	106.397	100.935	59.459	26.8305	310.409	422.333	383.22	0.0418391	0.139933	-206.602
Amino_acid_utilization_biosynthesis_metabolism;D-arginine_and_D-ornithine_metabolism	122.671	174.23	201.064	73.0482	85.0637	89.3275	52.9586	215.619	384.013	331.657	0.168625	0.216702	-208.986
TCA_cycle;Replenishment_of_TCA_cycle_intermediates_(necessary_because_some_intermediates_serve_as_precursors_for_biosysnthesis)	89.0959	110.607	160.062	80.0431	116.707	11.2543	21.3174	272.201	327.741	305.463	0.104378	0.0297826	-216.367
Transporters;Major_Facilitator_superfamily_(MFS);Protein_transporters;Peptide-acetyl-coA_transporter_(pAt)_[tc:2.A.1.25]	85.5454	72.9039	123.927	89.3566	70.6817	0	3.65875	282.776	321.756	303.711	0.153074	0.0821175	-218.165
TCA_cycle;Incomplete_TCA_fork	92.7133	112.034	150.506	98.1277	91.0791	68.4512	38.8105	286.51	331.997	312.68	0.263163	0.0775197	-219.967
Transporters;ABC_transporters,_prokaryotic_type;Phosphate_and_amino_acid_transporters;Glutamate/aspartate_transporter_[mD:m00230]	0.188719	0	1.41112	0	0	243.162	91.0733	281.221	216.651	232.069	0.275104	0.0821068	-231.88
Amino_acid_utilization_biosynthesis_metabolism;Histidine_degradation	46.9917	30.4915	32.784	70.3735	38.9907	14.8451	14.4735	319.309	278.432	280.566	0.0498435	0.0123753	-233.574
Transporters;ABC_transporters,_prokaryotic_type;ABC-2_type_and_other_transporters;Lipopolysaccharide_transporter_[mD:m00320]	173.33	284.176	219.33	122.182	91.2379	119.204	75.852	339.242	482.425	434.109	0.0442886	0.177501	-260.779
Transporters;Major_Facilitator_superfamily_(MFS);Metal_transporters;Putative_bacteriochlorophyll_delivery_(bcD)_family_[tc:2.A.1.41]	0	0	0	0	0	0	1.78736	235.822	319.31	289.469	0.5	0.0950303	-289.469
Fermentation;Acetoin_biosynthesis;Superpathway_of_(R,R)-butanediol_biosynthesis	0	0	0	0	0	224.28	114.333	284.238	360.261	334.953	0.199872	0.0747474	-334.953
Amino_acid_utilization_biosynthesis_metabolism;Lysine_degradation_VIII	21.0185	4.98616	83.8426	7.76493	28.5213	240.298	128.26	320.117	391.952	367.618	0.38123	0.0480275	-346.599
Transporters;ABC_transporters,_prokaryotic_type;Phosphate_and_amino_acid_transporters;Branched-chain_amino_acid_transporter_[mD:m00237]	210.379	58.2451	147.445	308.088	320.844	520.837	242.419	1125.03	819.516	879.561	0.371087	0.151105	-669.182
	0	0	0	0	0	0	0	0	0	0	#DIV/0!	#DIV/0!	0

## Sheet: FPK (not normalized to mg size)
Supplemental File 7. Total coverage of predicted pathways.
In this worksheet, values are in FPK (fragments per kilobase of protein length per million mapped read pairs), which is normalized to the length of the predicted protein.
# Pathway	combined-spring	BR2-spring-2012	BR2-spring-2013	GOR34-spring1-2013b	GOR34-spring3-2012	BR2-river-2012a	BR2-river-2013	GOR34-river-2012a	GOR34-river-2013b	combined_river
total mapped fragments (read pairs)	37004773	11059078	4948900	14026682	6970113	275619	401065	7476171	19980281	28133136
UNMAPPED	7.6744e+06	2.07953e+06	878170	3.1278e+06	1.699e+06	74883.5	127981	1.13835e+06	3.09392e+06	4.4313e+06
UNINTEGRATED	4.01696e+06	1.37539e+06	566261	1.43082e+06	683064	12651.3	14345.8	690886	2.05187e+06	2.7832e+06
Amino_acid_utilization_biosynthesis_metabolism;Alanine,_aspartate_and_glutamate_metabolism_(contain_asparagin_as_well)	4249.32	1736.63	760.02	1219.65	562.586	10.244	10.1302	1207.33	3769.69	4997.02
Amino_acid_utilization_biosynthesis_metabolism;Amino_acid_biosynthesis_precursor_pyruvate_and_oxaloacetate;Cysteine_and_methionine	4442.61	2018.51	737.51	1176.13	510.458	8.42486	7.72943	1063.1	3040.19	4119.44
Amino_acid_utilization_biosynthesis_metabolism;Amino_acid_biosynthesis_precursor_pyruvate_and_oxaloacetate;Glutamate	4596.86	1405.41	518.435	1945.07	727.948	0	0	0	0	0
Amino_acid_utilization_biosynthesis_metabolism;Amino_acid_biosynthesis_precursor_pyruvate_and_oxaloacetate;Histidine	2850.2	1133.06	0	882.902	376.278	9.19493	6.69438	798.762	2576.2	3390.86
Amino_acid_utilization_biosynthesis_metabolism;Amino_acid_biosynthesis_precursor_pyruvate_and_oxaloacetate;Oxaloacetate_to_lysine	3921.55	1734.61	647.308	1084.2	455.432	0	6.81534	0	0	0
Amino_acid_utilization_biosynthesis_metabolism;Amino_acid_biosynthesis_precursor_pyruvate_and_oxaloacetate;PEP	2299.63	967.589	405.312	643.35	283.379	6.71888	6.96521	698.838	2181.14	2893.66
Amino_acid_utilization_biosynthesis_metabolism;Amino_acid_biosynthesis_precursor_pyruvate_and_oxaloacetate;Pyruvate_to_leucine	3590.82	0	0	567.93	207.725	0	0	0	0	0
Amino_acid_utilization_biosynthesis_metabolism;Arginine_and_proline_metabolism	2755.49	1309.78	504.089	666.102	276.117	3.65075	5.19624	606.727	1704.61	2320.18
Amino_acid_utilization_biosynthesis_metabolism;Cysteine_and_methionine_metabolism	4215.02	1530.39	681.325	1404.09	610.432	9.11936	6.42654	928.063	2877.47	3821.08
Amino_acid_utilization_biosynthesis_metabolism;D-arginine_and_D-ornithine_metabolism	4539.4	1926.83	995.048	1024.62	592.904	24.6204	21.2398	1612.01	7672.68	9330.55
Amino_acid_utilization_biosynthesis_metabolism;D-glutamine_and_D-glutamate_metabolism	9150.3	3434.9	1354.72	3103.96	1270.83	9.24133	13.4289	1859.08	6500.38	8382.13
Amino_acid_utilization_biosynthesis_metabolism;Glycine,_serine_and_threonine_metabolism	2993.94	1139.68	470.45	938.504	452.87	7.90442	8.14681	1014.8	3165.97	4189.74
Amino_acid_utilization_biosynthesis_metabolism;Histidine_biosynthesis,_pRpp_=>_histidine	6535.71	3281.14	1161.83	1492.39	703.529	16.388	10.7608	2320.67	8438.32	10781.2
Amino_acid_utilization_biosynthesis_metabolism;Histidine_degradation	1738.92	337.208	162.245	987.107	271.77	4.0916	5.80482	2387.21	5563.14	7893.19
Amino_acid_utilization_biosynthesis_metabolism;Lysine_biosynthesis	5361.88	2427.04	924.162	1394.1	620.398	18.0844	13.8336	1482.23	4448.97	5961.25
Amino_acid_utilization_biosynthesis_metabolism;Lysine_degradation_VIII	777.784	55.1423	414.929	108.916	198.797	66.2306	51.4405	2393.25	7831.31	10342.2
Amino_acid_utilization_biosynthesis_metabolism;Methionine_biosynthesis	3909.83	1367.29	684.711	1262.38	612.622	29.2621	14.932	2012.46	5022.82	7079.47
Amino_acid_utilization_biosynthesis_metabolism;Methionine_degradation	4079.36	785.417	423.859	1875.77	994.317	19.9407	0	1146.16	3500.02	4645.27
Amino_acid_utilization_biosynthesis_metabolism;Oxydation_deamination	3624.21	2122.45	779.622	908.376	377.516	0	0	707.281	1983.37	2527.69
Amino_acid_utilization_biosynthesis_metabolism;Phenylalanine,_tyrosine_and_tryptophan_biosynthesis	4078.73	1901.69	676.298	984.495	522.432	8.69407	5.66289	1239	3623.34	4876.7
Amino_acid_utilization_biosynthesis_metabolism;Phenylalanine_metabolism	1770.08	734.289	348.841	495.637	191.315	4.53834	4.2437	664.217	2312.49	2985.49
Amino_acid_utilization_biosynthesis_metabolism;Transamination	16379.6	7306.62	2686.47	4528.69	1857.77	8.23453	6.59047	2562.26	9172.79	11749.9
Amino_acid_utilization_biosynthesis_metabolism;Tryptophan_metabolism	1200.55	246.111	195.851	511.876	246.714	6.04771	3.24894	727.046	2176.3	2912.64
Amino_acid_utilization_biosynthesis_metabolism;Valine,_leucine_and_isoleucine_biosynthesis	6915.13	2955.61	1143.11	1894.04	928.186	25.0717	21.3894	2320.15	7986.2	10342.1
Amino_acid_utilization_biosynthesis_metabolism;Valine,_leucine_and_isoleucine_degradation	2257.28	623.085	314.667	848.602	472.66	5.64978	5.73891	1239.73	3488.88	4739.39
Carbohydrate_Active_enzyme_-_CAZy;Carbohydrate_esterase	0	0	0	0	0	0	0	354.7	1118.22	1476.59
Carbohydrate_Active_enzyme_-_CAZy;Glycoside_hydrolase	584.409	228.279	84.5011	213.252	58.3766	0.465542	0.544074	200.625	404.358	605.992
Carbohydrate_Active_enzyme_-_CAZy;Glycosyltransferase	932.969	445.947	146.113	236.019	104.889	1.808	1.18481	169.969	522.134	695.096
Carbohydrate_Active_enzyme_-_CAZy;Polysaccharide_lyase	983.956	0	213.535	283.223	97.2603	4.23348	3.64257	0	0	1509.09
Cellular_response_to_stress;Cellular_response_to_osmotic_stress	721.481	180.754	151.104	291.14	98.4822	0	0.803233	221.454	751.693	974.46
Cellular_response_to_stress;Cellular_response_to_oxidative_stress	3326.22	1178.25	497.91	1187.15	462.913	0	4.76689	829.23	2599.8	3439.96
Cellular_response_to_stress;Cellular_response_to_stress	1336.07	421.963	228.804	483.29	202.013	4.18144	3.30768	422.624	1216.21	1646.32
Cellular_response_to_stress;Regulation_of_stress-activated_protein_kinase_signaling_cascade	20017.3	10841.2	3169.2	4209.37	1797.56	10.0312	23.0355	5142.73	10385.1	15560.9
Cellular_response_to_stress;Response_to_nitrosative_stress	2920.32	1022.54	485.292	1035.6	376.885	13.8298	10.757	1139.16	3205.78	4369.53
Cellular_response_to_stress;Response_to_osmotic_stress	574.05	155.28	106.22	220.128	92.4213	1.6929	1.58612	203.178	666.294	872.751
Cellular_response_to_stress;Response_to_oxidative_stress	3667.7	1102.12	626.618	1388.38	550.587	4.73581	3.73245	1175.23	4004.85	5188.55
Cellular_response_to_stress;Trehalose_metabolism_in_response_to_cold_stress	223.03	120	32.7273	18.1818	105.769	0	0	0	0	0
Embden_Meyerhof-Parnos_(EMP);EMP	12218.9	5687.07	1831.09	3662.06	1534.56	17.0926	16.2524	2194.59	6178.54	8379.11
Embden_Meyerhof-Parnos_(EMP);EMP__in_archea	10066	4799.21	1613.36	2714.02	1102.11	0	0	1575.6	4934.83	6539.35
Embden_Meyerhof-Parnos_(EMP);EMP_modified_pathway	4846.03	2772.52	578.155	1031.88	513.511	0	0	0	0	0
Embden_Meyerhof-Parnos_(EMP);Glycolysis_III_(EMP)	11786.8	5391.56	1755.8	3420.26	1462.04	15.7542	15.3281	2074.29	5983.89	8064.19
Fatty_acid_oxidation;Fatty_acid_activation	4794.59	2105.23	844.878	1365.43	568.468	0	0	1374.36	5047.85	6441.85
Fatty_acid_oxidation;Fatty_acid_beta-oxidation_I	3603.64	1446.98	704.92	1015.06	437.029	10.4645	7.05652	1291.77	3942.05	5251.34
Fatty_acid_oxidation;Fatty_acid_beta-oxidation_III_(unsaturated)	6028.61	2817.52	1016.14	1659.57	535.38	0	0	1338.49	3723.48	5067.25
Fatty_acid_oxidation;Fatty_acid_beta-oxidation_IV_(unsaturated)	4625.72	1969.11	849.534	1265.34	634.242	0	0	1199.84	5190	6412.51
Fatty_acid_oxidation;Fatty_acid_omega-oxidation	1639.14	3.53547	63.9065	1139.53	432.168	0	0	654.309	2478.66	3137.12
Fermentation;Acetoin_biosynthesis;(R)-acetoin_biosynthesis_I	10513.3	3779.9	1463.31	3745.02	1525.02	86.651	62.035	2897.09	10613.5	13659.3
Fermentation;Acetoin_biosynthesis;(s)-acetoin_biosynthesis	10513.3	3779.9	1463.31	3745.02	1525.02	86.651	62.035	2897.09	10613.5	13659.3
Fermentation;Acetoin_biosynthesis;(s,s)-butanediol_biosynthesis	0	0	0	0	0	12.1457	13.4953	2.69906	74.224	102.564
Fermentation;Acetoin_biosynthesis;Acetoin_biosynthesis_III	0	0	0	0	0	12.1457	13.4953	2.69906	74.224	102.564
Fermentation;Acetoin_biosynthesis;Meso-butanediol_biosynthesis_I	0	0	0	0	0	12.1457	13.4953	2.69906	74.224	102.564
Fermentation;Acetoin_biosynthesis;Meso-butanediol_biosynthesis_II	10513.3	3779.9	1463.31	3745.02	1525.02	86.651	62.035	2897.09	10613.5	13659.3
Fermentation;Acetoin_biosynthesis;Superpathway_of_(R,R)-butanediol_biosynthesis	0	0	0	0	0	61.8159	45.8551	2125.01	7198.11	9423.28
Fermentation;Acetylene_degradation	1370.06	501.002	241.43	456.396	176.381	0	0	0	0	0
Fermentation;Bifidobacterium_shunt	4034.18	1849.97	570.976	1183.91	449.787	0	0	0	0	0
Fermentation;Glutamate_degradation_V_(via_hydroxyglutarate)	1288.22	481.292	196.992	424.397	185.535	0	0	0	0	0
Fermentation;Heterolactic_fermentation	3397.21	0	0	1216.64	0	0	0	849.796	2203.29	3059.75
Fermentation;Homolactic_fermentation	4430.89	0	0	1088.34	464.968	0	0	0	0	0
Fermentation;Lysine_fermentation_to_acetate_and_butyrate	4316.02	1630.62	746.498	1540.06	579.072	0	0	803.833	2643.67	3297.35
Fermentation;Mixed_acid_fermentation	1715.16	627.073	261.162	566.628	260.297	2.20439	0	0	1375.4	1836.37
Fermentation;Pyruvate_Fermentation;Pyruvate_fermentation_to_acetate_II	5140.48	2959.33	691.15	1751.26	756.734	0	0	374.168	0	1934.81
Fermentation;Pyruvate_Fermentation;Pyruvate_fermentation_to_acetate_III	639.044	14.0056	4.20168	510.51	125.409	0	0	0	145.125	145.125
Fermentation;Pyruvate_Fermentation;Pyruvate_fermentation_to_acetate_V	4509.64	2273.27	659.934	1445.5	626.291	0	0	0	0	0
Fermentation;Pyruvate_Fermentation;Pyruvate_fermentation_to_acetate_VI	4509.64	2273.27	659.934	1445.5	626.291	0	0	0	0	0
Fermentation;Pyruvate_Fermentation;Pyruvate_fermentation_to_acetate_VII	4171.86	1640.11	662.314	1350	519.427	0	0	558.954	2327.16	2899.91
Fermentation;Pyruvate_Fermentation;Pyruvate_fermentation_to_acetate_VIII	4822.75	2886.9	588.629	889.388	457.838	0	0	0	0	0
Fermentation;Pyruvate_Fermentation;Pyruvate_fermentation_to_acetate_and_alanine	3726.55	2184.82	477.136	699.633	389.523	0	0	0	0	0
Fermentation;Pyruvate_Fermentation;Pyruvate_fermentation_to_acetate_and_lactate_I	2987.29	0	0	805.702	398.974	0	0	0	2755.61	3549.9
Fermentation;Pyruvate_Fermentation;Pyruvate_fermentation_to_acetate_and_lactate_II	5140.48	2959.33	691.15	1751.26	756.734	0	0	374.168	0	1934.81
Fermentation;Pyruvate_Fermentation;Pyruvate_fermentation_to_ethanol_I	314.296	38.3186	0	167.546	53.5363	0	0	0	0	0
Fermentation;Pyruvate_Fermentation;Pyruvate_fermentation_to_ethanol_II	237.201	45.3573	73.0766	79.6054	39.1618	0	0	0	0	0
Fermentation;Pyruvate_Fermentation;Pyruvate_fermentation_to_ethanol_III	3713.03	2165.65	443.2	784.384	361.812	0	0	0	0	0
Fermentation;Pyruvate_Fermentation;Pyruvate_fermentation_to_lactate	5915.1	2698.82	963.493	1579.83	701.902	0	0	905.401	3139.74	4059.91
Fermentation;Pyruvate_Fermentation;Pyruvate_fermentation_to_propionate_II_(acrylate_pathway)	5382	2867.27	800.316	1120.55	597.405	0	0	0	0	0
Fermentation;Pyruvate_Fermentation;Superpathway_of_clostridium_acetobutylicum_acidogenic_and_solventogenic_fermentation	0	0	0	0	0	0	0	0	0	0
Gluconeogenesis;Gluconeogenesis	5818.44	2803.16	910.747	1500.19	808.597	7.95324	8.52346	607.97	2384.89	3006.32
Gluconeogenesis;Gluconeogenesis_in_archea	11225.6	5380.66	1796.97	2972.88	1246.57	0	17.8927	1946.13	5562.08	7545.01
Homoacetogenesis;Acetate_formation_from_acetyl-coA_I	5026.63	2754.51	862.382	2658.51	980.02	2.46002	25.138	1112.22	3650.13	4789.94
Homoacetogenesis;Acetate_formation_from_acetyl-coA_II	19.6078	14.0056	4.20168	1.40056	0	0	0	0	0	0
Homoacetogenesis;Glycolysis	0	0	0	0	0	0	0	449.215	0	0
Homoacetogenesis;Reductive_acetyl_coenzyme_A_pathway	0	0	635.402	0	0	0	0	0	0	0
Hydrocarbon_degradation;Aromatic_carboxylic_acid_degradation	1244.68	275.223	200.291	523.969	245.196	9.25079	4.23305	815.816	1953.48	2782.78
Hydrocarbon_degradation;BTEX_and_related_aromatics_degradation	0	0	0	0	0	0	0	172.278	519.608	691.885
Hydrocarbon_degradation;Chlorinated_aromatics_degradation	96.056	0	1.27226	64.2494	30.5344	0	0	0	10.8077	10.8077
Hydrocarbon_degradation;Hydrocarbon_degradation	1115.37	2.62931	64.7993	759.825	0	0	0	0	0	0
Hydrocarbon_degradation;Nitoaromatics_degradation	0	0	0	0	0	16.129	9.55795	662.682	465.83	1063.63
Hydrocarbon_degradation;Other_aromatics_degradation	944.09	87.3302	96.2096	564.677	195.873	4.8097	1.45335	338.609	827.661	1172.53
Hydrocarbon_degradation;Polycyclic_aromatic_hydrocarbon_degradation	918.263	274.25	106.235	327.037	210.74	4.62652	2.64542	238.871	500.072	746.214
Hydrogen_metabolism;Hydrogen_oxidation_aerobic	1484.08	297.96	447.198	433.528	338.339	0	0	0	0	0
Hydrogen_metabolism;Hydrogen_production	2013.03	1039.07	380.852	382.855	258.593	0	0	472.46	394.186	866.647
Hydrogen_metabolism;Hydrogen_production_VII_(chlorophyta,_cyanobacteria)	304.81	195.527	109.283	0	0	0	0	0	0	0
Hydrolysis_of_polymers;Arabinose	214.127	0	0	170.46	43.6675	0	0	48.0651	665.194	713.259
Hydrolysis_of_polymers;Cellulose	34.7796	0	0	29.5537	5.22582	0	0	5.67721	42.9846	48.6618
Hydrolysis_of_polymers;Galactose	1410.23	590.915	186.756	415.95	216.608	0	3.15581	188.675	848.065	1043.3
Hydrolysis_of_polymers;Mannose	684.461	241.635	103.037	220.826	118.962	1.49269	1.20093	139.972	520.411	663.077
Hydrolysis_of_polymers;Starch	1447.71	577.039	204.048	480.361	186.261	3.79641	2.66033	388.612	1009.8	1404.87
Hydrolysis_of_polymers;Xylose	1257.35	395.343	164.688	494.873	202.449	5.57576	8.23833	507.105	1508.31	2029.22
Methanogenesis;From_CO2	1306.35	655.03	282.049	231.96	165.689	0	0	20.242	128.703	0
Methanogenesis;From_acetate	3732.34	2282.21	608.4	457.471	417.801	1.32414	1.06642	289.56	650.498	942.448
Methanogenesis;From_dimethylamine	2336.22	1504.71	351.93	196.005	283.577	0	0	0	0	0
Methanogenesis;From_formate	1915.7	652.696	423.916	583.397	304.949	0.972899	0	0	0	1423.57
Methanogenesis;From_methanol	2336.22	1504.71	351.93	209.493	283.577	0	0	0	0	0
Methanogenesis;From_methylamine	2336.22	1504.71	351.93	196.005	283.577	0	0	0	0	0
Methanogenesis;From_trimethylamine	2336.22	1504.71	351.93	196.005	283.577	0	0	0	0	0
Methylotrophy;Formaldehyde_oxidation_(glutathione-dependent)	4021	343.722	913.709	1877.74	885.831	0	0	1354.95	4692.17	6042.34
Methylotrophy;Formaldehyde_oxidation_(h4mpt_pathway)	1563.63	172.267	449.092	926.514	96.5567	0	8.86959	0	0	12.9168
Methylotrophy;Formaldehyde_oxidation_(tetrahydrofolate_pathway)	8710.12	3532.61	1503.58	2472.85	1201.09	0	0	1471.06	4727.86	6200.56
Methylotrophy;Methane_oxidation_to_cO2	2360.52	344.272	643.226	1064.2	397.716	0.290288	0.739691	512.098	1733.96	2247.09
Methylotrophy;Methanol_oxidation_to_formaldehyde	1172.26	50.9903	477.037	660.934	45.2983	0	0	0	0	0
Methylotrophy;Methylamine_to_formaldehyde	348.179	41.6789	291.295	2.94327	12.2618	0	0	0	0	0
Methylotrophy;RuMP_pathway_for_formaldehyde_fixation_(first_two_steps_are_common_to_both_RuMP_pathway_variants)	6599.27	1940.68	595.343	2797.13	1323.04	0	0	1393.68	3687.89	5085.22
Methylotrophy;Serine_pathway_for_formaldehyde_fixation	8167.48	3415.05	1550.04	2228.87	1035.57	0	0	1754.84	5599.58	7386.78
Nitrogen_cycle;Ammonia_assimilation	4228.48	1430.91	1034.11	1248.23	602.118	11.6153	0	1116.66	3261.11	4245.1
Nitrogen_cycle;Nitrification_(aerobic_ammonia_oxydation,_bacterial_and_archea);Ammonia_to_hydroxylamine	831.066	0	2.67476	791.9	43.7391	0	0	18.2999	0.648508	18.9484
Nitrogen_cycle;Nitrogen_Fixation	664.609	207.679	122.117	121.993	213.69	0	0	0	0	0
Nitrogen_cycle;Nitrogenated_compounds_Reduction;Assimilatory_nitrate_reduction;Nitrate_to_ammonia	3133.79	87.4576	294.336	1999.04	806.071	0	0	331.313	407.388	738.702
Nitrogen_cycle;Nitrogenated_compounds_Reduction;Denitrification;Nitrate_to_nitrite	1925.5	151.881	313.012	1033.16	427.439	0	0	36.0043	81.2965	117.301
Nitrogen_cycle;Nitrogenated_compounds_Reduction;Denitrification;Nitrite_oxide_to_nitrous_oxide	162.832	0	110.24	52.5926	0	0	0	0	0	0
Nitrogen_cycle;Nitrogenated_compounds_Reduction;Denitrification;Nitrous_oxide_to_nitrogen	13.6202	0	0	13.6202	0	0	0	0	0	0
Nitrogen_cycle;Nitrogenated_compounds_Reduction;Dissimilatory_nitrate_reduction;Nitrate_to_ammonia	307.864	0.334672	1.7339	235.867	69.9282	0	0	0	0	0
Nitrogen_cycle;Nitrogenated_compounds_Reduction;Hydroxylamine_reduction	2185.45	1069.89	311.914	501.608	302.033	0	0	0	0	0
Nucleic_acid_metabolism;Degradation_of_purine_bases	870.647	74.933	81.4336	501.839	212.442	6.4224	3.55193	555.602	1201.26	1766.84
Nucleic_acid_metabolism;Degradation_of_pyrimidine_bases	212.419	5.0522	0	53.9816	94.4396	0	0	0	0	0
Nucleic_acid_metabolism;Purine_metabolism	3942.13	1554.23	602.141	1231.8	553.958	9.93533	9.03705	799.858	2552.93	3371.76
Nucleic_acid_metabolism;Pyrimidine_metabolism	5258.08	2072.03	786.229	1697.54	702.279	19.2129	13.5238	1066.25	3210.93	4309.92
Saccharide_and_derivated_synthesis;Disaccaride_phosphorylase;Cellobiose	873.911	139.619	72.5624	537.208	124.522	0	0	830.328	848.66	1680.28
Saccharide_and_derivated_synthesis;Disaccaride_phosphorylase;Lactose	0	0	0	0	0	0	0	0	0	0
Saccharide_and_derivated_synthesis;Polysaccharide_biosynthesis_and_assembly_of_cell_surface_structure;Lipopolysaccharide_biosynthesis	1166.46	459.357	201.258	351.099	154.745	2.4494	1.59568	329.998	1030.62	1364.67
Saccharide_and_derivated_synthesis;Polysaccharide_biosynthesis_and_assembly_of_cell_surface_structure;Murein	10475.1	4373.4	1704.07	3027.65	1369.95	22.8685	13.902	1345.98	4516.15	5886.65
Saccharide_and_derivated_synthesis;Polysaccharide_biosynthesis_and_assembly_of_cell_surface_structure;N-glycan_biosynthesis	0	0	0	0	0	0	0.468813	80.6858	321.94	403.671
Saccharide_and_derivated_synthesis;Polysaccharide_biosynthesis_and_assembly_of_cell_surface_structure;Peptidoglycan_biosynthesis	2084.78	839.641	319.165	644.567	281.404	2.73926	2.31331	335.926	1175.71	1516.69
Sulfur_compounds_metabolism;Chemoautotrophic_oxidation_of_sulfur_compounds;Sulfide_oxidation_III_or_sulfur_oxidation_I_(sulfur_dioxygenase)	6262.59	23.6441	45.0355	3885.99	2308.22	48.8889	31.0819	1017.96	1231.07	2329.01
Sulfur_compounds_metabolism;Chemoautotrophic_oxidation_of_sulfur_compounds;Superpathway_of_sulfur_metabolism_(Desulfocapsa_sulfoexigens)	3408.93	1967.09	531.25	789.681	381.898	7.73795	4.47862	812.476	1932.95	2757.64
Sulfur_compounds_metabolism;Sulfur_compounds_cycle;Sulfate_reduction_(assimilatory)	2846.21	1051.18	572.516	1090.72	320.326	13.801	9.78006	1327.23	2703.96	3966.02
Sulfur_compounds_metabolism;Sulfur_compounds_cycle;Sulfate_reduction_(dissimilatory)	4695.22	2985.02	770.997	806.096	600.848	7.73795	4.47862	812.476	1932.95	2757.64
Sulfur_compounds_metabolism;Sulfur_compounds_cycle;Sulfite_oxidation	2932.94	1574.73	439.74	679.781	363.448	0	0	0	0	0
Sulfur_compounds_metabolism;Sulfur_compounds_cycle;Sulfoacetaldehyde_degradation	0	0	0	0	0	0	0.274574	0	146.883	469.358
Sulfur_compounds_metabolism;Sulfur_compounds_cycle;Sulfolactate_degradation	2813.86	1718.87	491.14	433.896	169.953	0	0	0	0	0
Sulfur_compounds_metabolism;Sulfur_compounds_cycle;Sulfur_disproportionation	2843.36	1423.27	484.495	940.641	342.954	9.43961	5.62043	1082.42	2576.97	3669.25
Sulfur_compounds_metabolism;Sulfur_compounds_cycle;Thiosulfate_disproportionation	3134.12	1594.54	489.625	848.955	409.794	6.41258	0	1062.1	3072.86	4144.96
Superpathway_of_thiosulfate_metabolism_(Desulfovibrio_sulfodismutans)	4995.09	2579.98	765.91	1408.44	689.449	15.5215	8.60107	761.133	3040.81	3789.19
TCA_cycle;Incomplete_TCA_fork	3430.84	1238.99	744.837	1376.41	634.831	18.8665	15.5655	2142	6633.38	8796.66
TCA_cycle;Reductive_TCA_cycle	5766.26	2370.28	916.899	1735.98	941.49	18.5697	10.1035	1928.4	5989.93	7946.03
TCA_cycle;Replenishment_of_TCA_cycle_intermediates_(necessary_because_some_intermediates_serve_as_precursors_for_biosysnthesis)	3296.98	1223.21	792.129	1122.74	813.461	3.10189	8.54967	2035.02	6548.35	8593.62
TCA_cycle;TCA_cycle	4889.14	2369.79	775.825	1506.13	727.076	14.5596	10.0409	1697.52	5216.36	6860.5
Transporters;ABC_transporters,_prokaryotic_type;ABC-2_type_and_other_transporters;ABC-2_type_transporter_[mD:m00254]	21943.7	3825.08	2776.97	10937	4404.63	17.8921	112.617	3613.84	11215.8	14424.6
Transporters;ABC_transporters,_prokaryotic_type;ABC-2_type_and_other_transporters;Capsular_polysaccharide_transporter_[mD:m00249]	719.745	0	8.07925	668.968	49.629	3.10559	2.03208	60.2568	3731.02	3770.79
Transporters;ABC_transporters,_prokaryotic_type;ABC-2_type_and_other_transporters;Cell_division_transporter_[mD:m00256]	15358.5	7684.21	2266.42	3841.79	1566.13	0	11.5942	963.296	2362.92	3149.22
Transporters;ABC_transporters,_prokaryotic_type;ABC-2_type_and_other_transporters;Heme_transporter_[mD:m00259]	4523.42	1827.81	747.654	1470.37	611.789	3.41124	1.54321	1031.35	3290.09	4326.4
Transporters;ABC_transporters,_prokaryotic_type;ABC-2_type_and_other_transporters;Lipooligosaccharide_transporter_[mD:m00252]	2774.89	2335.5	355.309	140.825	223.55	0	0	1225.5	2286.93	3403.12
Transporters;ABC_transporters,_prokaryotic_type;ABC-2_type_and_other_transporters;Lipopolysaccharide_transporter_[mD:m00250]	7449.62	2089.67	845.532	2578.43	1995.01	9.47048	37.46	571.891	3051.9	3585.6
Transporters;ABC_transporters,_prokaryotic_type;ABC-2_type_and_other_transporters;Lipopolysaccharide_transporter_[mD:m00320]	6414.04	3142.72	1085.44	1713.8	635.939	32.855	30.4216	2536.23	9638.99	12212.8
Transporters;ABC_transporters,_prokaryotic_type;ABC-2_type_and_other_transporters;Lipoprotein-releasing_transporter_[mD:m00255]	7063.02	2725.76	1169.59	2216.46	951.206	0	10.4033	2252.53	5983.33	8246.26
Transporters;ABC_transporters,_prokaryotic_type;ABC-2_type_and_other_transporters;Multidrug/hemolysin_transporter_[mD:m00298]	323.925	0	1.09649	321.577	10.9649	0	0	0	0	0
Transporters;ABC_transporters,_prokaryotic_type;ABC-2_type_and_other_transporters;Orphan_ABC_Atpase	4693.25	2197.99	750.876	1429.01	315.379	0	29.8255	686.124	1578.49	2294.44
Transporters;ABC_transporters,_prokaryotic_type;ABC-2_type_and_other_transporters;Sodium_transporter_[mD:m00253]	785.22	5.9676	20.4517	530.553	228.247	0	0	0	0	0
Transporters;ABC_transporters,_prokaryotic_type;ABC-2_type_and_other_transporters;Teichoic_acid_transporter_[mD:m00251]	5.73301	2.457	1.638	1.638	0	0	0	15.9276	713.911	728.346
Transporters;ABC_transporters,_prokaryotic_type;ABC-2_type_and_other_transporters;Uncharacterized_ABC_transporter_[mD:m00258]	27759.6	9638.84	5053.86	8882.06	5876.56	83.139	75.8521	3366.75	9735.93	13129.8
Transporters;ABC_transporters,_prokaryotic_type;Mineral_and_organic_ion_transporters;Glycine_betaine/proline_transporter_[mD:m00208]	36.3433	0	0	27.4777	8.86558	0	0	0	0	0
Transporters;ABC_transporters,_prokaryotic_type;Mineral_and_organic_ion_transporters;Iron(III)_transporter_[mD:m00190]	8399.68	3389.91	1071	2553.38	1385.39	77.6473	44.5933	1527.68	6996.88	8586.34
Transporters;ABC_transporters,_prokaryotic_type;Mineral_and_organic_ion_transporters;Molybdate_transporter_[mD:m00189]	2203.34	762.503	679.383	594.567	235.366	24.2699	14.1602	1885.01	4525.48	6448.93
Transporters;ABC_transporters,_prokaryotic_type;Mineral_and_organic_ion_transporters;Osmoprotectant_transporter_[mD:m00209]	251.285	25.4881	22.4482	17.5673	185.782	0	0.658762	402.991	1714.53	2118.18
Transporters;ABC_transporters,_prokaryotic_type;Mineral_and_organic_ion_transporters;Putative_spermidine/putrescine_transporter_[mD:m00193]	1280.84	312.391	101.097	586.316	281.033	0	7.04328	33.2766	1464.87	1503.25
Transporters;ABC_transporters,_prokaryotic_type;Mineral_and_organic_ion_transporters;Putative_thiamine_transporter_[mD:m00192]	0	0	0	0	0	0	0	376.983	591.368	968.351
Transporters;ABC_transporters,_prokaryotic_type;Mineral_and_organic_ion_transporters;Putative_tungstate_transporter_[mD:m00186]	3202.47	1547.23	484.285	833.748	444.214	35.9326	19.5381	1357.9	4576.03	5954.34
Transporters;ABC_transporters,_prokaryotic_type;Mineral_and_organic_ion_transporters;Putrescine_transporter_[mD:m00300]	1251.76	42.6468	351.5	560.952	329.637	0	0	503.09	556.544	1057.81
Transporters;ABC_transporters,_prokaryotic_type;Mineral_and_organic_ion_transporters;Spermidine/putrescine_transporter_[mD:m00299]	133.313	0	0	92.8893	40.4235	0	0.452899	95.8977	1636.17	1683.94
Transporters;ABC_transporters,_prokaryotic_type;Mineral_and_organic_ion_transporters;Sulfate_transporter_[mD:m00185]	3462.87	48.604	489.887	2229.1	707.46	2.1636	0	1143.58	2576.96	3721.07
Transporters;ABC_transporters,_prokaryotic_type;Mineral_and_organic_ion_transporters;Sulfonate/nitrate/taurine_transporter_[mD:m00188]	5856.66	1376.36	1441.94	2114.93	923.434	69.5652	47.4905	1903.88	5740.27	7635.72
Transporters;ABC_transporters,_prokaryotic_type;Mineral_and_organic_ion_transporters;Thiamine_transporter_[mD:m00191]	10.9127	0	0	7.27513	3.63757	0	0	60.2752	278.576	338.851
Transporters;ABC_transporters,_prokaryotic_type;Monosaccharide_transporters;D-Xylose_transporter_[mD:m00215]	67.8925	0	0	44.8655	23.027	5.57103	10.8645	9.20832	543.048	563.641
Transporters;ABC_transporters,_prokaryotic_type;Monosaccharide_transporters;Fructose_transporter_[mD:m00218]	41.6218	0	0	28.4838	13.138	17.556	22.8993	135.496	307.888	483.84
Transporters;ABC_transporters,_prokaryotic_type;Monosaccharide_transporters;Methyl-galactoside_transporter_[mD:m00214]	19.5726	0	0	19.5726	0	0	0	0	0	0
Transporters;ABC_transporters,_prokaryotic_type;Monosaccharide_transporters;Phosphate_transporter_[mD:m00222]	14451.2	5185.48	1540.75	5684.51	2507.4	51.5883	36.5135	2291.75	8692.09	11066.9
Transporters;ABC_transporters,_prokaryotic_type;Monosaccharide_transporters;Phosphonate_transporter_[mD:m00223]	9072.03	2186.85	653.013	2732.05	3500.11	33.818	30.0047	1936.98	5582.26	7554.58
Transporters;ABC_transporters,_prokaryotic_type;Monosaccharide_transporters;Putative_multiple_sugar_transporter_[mD:m00216]	318.789	0.324886	0	274.741	43.723	0.404531	2.42718	139.037	761.533	903.402
Transporters;ABC_transporters,_prokaryotic_type;Monosaccharide_transporters;Putative_phosphonate_transporter_[mD:m00224]	7455.51	786.884	393.113	2318.86	4002.02	1.26743	0	407.104	863.388	1270.49
Transporters;ABC_transporters,_prokaryotic_type;Monosaccharide_transporters;Rhamnose_transporter_[mD:m00220]	45.3814	7.1054	0.661376	24.5234	13.0912	0	0.327439	0	98.5041	98.5041
Transporters;ABC_transporters,_prokaryotic_type;Monosaccharide_transporters;Ribose_transporter_[mD:m00212]	1277.61	110.249	57.6564	789.417	320.283	0	10.4422	285.269	1352.58	1648.29
Transporters;ABC_transporters,_prokaryotic_type;Monosaccharide_transporters;Simple_sugar_transporter_[mD:m00221]	2940.02	421.175	480.416	1236.59	804.44	28.7338	21.7259	1693.72	3208.75	4735.3
Transporters;ABC_transporters,_prokaryotic_type;Oligosaccharide_and_polyol_transporters;Alpha-glucoside_transporter_[mD:m00201]	277.368	106.959	34.7354	57.5193	80.4008	0.500501	5.50551	131.374	895.428	1032.81
Transporters;ABC_transporters,_prokaryotic_type;Oligosaccharide_and_polyol_transporters;Maltose/maltodextrin_transporter_[mD:m00194]	191.414	53.3801	16.9262	79.4762	41.6318	8.09213	9.35575	275.555	693.589	964.264
Transporters;ABC_transporters,_prokaryotic_type;Oligosaccharide_and_polyol_transporters;Multiple_sugar_transporter_[mD:m00196]	429.63	0	0	427.35	43.3206	0	12.1364	354.643	1558.33	1921.99
Transporters;ABC_transporters,_prokaryotic_type;Oligosaccharide_and_polyol_transporters;Multiple_sugar_transporter_[mD:m00207]	2412.25	408.727	172.631	1259.08	605.731	41.5464	31.4925	555.186	2704.71	3316.92
Transporters;ABC_transporters,_prokaryotic_type;Oligosaccharide_and_polyol_transporters;Putative_ABC_transporter_[mD:m00210]	11933.7	3546.84	1818.35	4890.27	2007.48	33.2989	20.6648	2480.14	8320.07	10517.9
Transporters;ABC_transporters,_prokaryotic_type;Oligosaccharide_and_polyol_transporters;Putative_ABC_transporter_[mD:m00211]	1088.81	191.106	65.8546	608.118	233.744	0	0	0	0	0
Transporters;ABC_transporters,_prokaryotic_type;Oligosaccharide_and_polyol_transporters;Sn-glycerol_3-phosphate_transporter_[mD:m00198]	1589.13	18.6736	61.5629	905.048	606.649	53.0575	33.1248	458.279	1320.08	1826.74
Transporters;ABC_transporters,_prokaryotic_type;Oligosaccharide_and_polyol_transporters;Sorbitol/mannitol_transporter_[mD:m00200]	84.2503	0	37.4618	28.9347	17.8539	0.383142	1.14943	0.977032	147.107	149.616
Transporters;ABC_transporters,_prokaryotic_type;Oligosaccharide_and_polyol_transporters;Trehalose/maltose_transporter_[mD:m00204]	0	0	0	0	0	0	0	0	244.03	244.03
Transporters;ABC_transporters,_prokaryotic_type;PEPtide_and_nickel_transporters;DiPEPtide_transporter_[mD:m00324]	0	0	0	0	0	0	0	139.852	9.60735	149.46
Transporters;ABC_transporters,_prokaryotic_type;PEPtide_and_nickel_transporters;Microcin_c_transporter_[mD:m00349]	5156.16	2125	566.158	1555.83	1182.67	0	0.733072	1421.1	4432.02	5853.59
Transporters;ABC_transporters,_prokaryotic_type;PEPtide_and_nickel_transporters;PEPtides/nickel_transporter_[mD:m00239]	12033.9	3691.47	1758.98	4245.91	2337.55	5.32377	5.93877	1197.73	5230.5	6436.69
Transporters;ABC_transporters,_prokaryotic_type;Phosphate_and_amino_acid_transporters;Arginine/ornithine_transporter_[mD:m00235]	2374.52	18.6615	29.601	1766.41	559.846	1.4556	3.63901	3.15204	0.606061	8.85272
Transporters;ABC_transporters,_prokaryotic_type;Phosphate_and_amino_acid_transporters;Arginine_transporter_[mD:m00229]	0	0	0	0	0	2.25836	0	0	0	2.25836
Transporters;ABC_transporters,_prokaryotic_type;Phosphate_and_amino_acid_transporters;Branched-chain_amino_acid_transporter_[mD:m00237]	7785.03	644.137	729.688	4321.45	2236.32	143.552	97.2258	8410.9	16374.2	24744.8
Transporters;ABC_transporters,_prokaryotic_type;Phosphate_and_amino_acid_transporters;Cystine_transporter_[mD:m00234]	0	0	0	0	0	0	0	0.603865	352.657	353.261
Transporters;ABC_transporters,_prokaryotic_type;Phosphate_and_amino_acid_transporters;General_l-amino_acid_transporter_[mD:m00232]	172.345	0	123.458	49.4409	19.8607	0	0.426257	189.354	1182.56	1312.91
Transporters;ABC_transporters,_prokaryotic_type;Phosphate_and_amino_acid_transporters;Glutamate/aspartate_transporter_[mD:m00230]	6.98349	0	6.98349	0	0	67.0201	36.5263	2102.46	4328.74	6528.83
Transporters;ABC_transporters,_prokaryotic_type;Phosphate_and_amino_acid_transporters;Neutral_amino_acid_transporter_[mD:m00322]	5.67376	0	0.472813	0	5.20095	0	0	0	0	0
Transporters;ABC_transporters,_prokaryotic_type;Phosphate_and_amino_acid_transporters;Polar_amino_acid_transporter_[mD:m00236]	1080.99	157.272	72.7977	519.57	331.351	77.7464	43.8017	301.878	1041.34	1464.77
Transporters;ABC_transporters,_prokaryotic_type;Phosphate_and_amino_acid_transporters;Putative_glutamine_transporter_[mD:m00228]	6.06061	0	0	6.06061	0	0	0	0	0	0
Transporters;ABC_transporters,_prokaryotic_type;Phosphate_and_amino_acid_transporters;Urea_transporter_[mD:m00323]	1844.87	90.1849	840.064	692.489	289.957	1.70806	6.20899	108.774	650.783	745.955
Transporters;ABC_transporters,_prokaryotic_type;_metallic_cation,_iron-siderophore_and_vitamin_b12_transporters;Cobalt_transporter_[mD:m00245]	3901.67	2816.18	535.1	234.997	429.395	0	0	16.6769	602.655	619.309
Transporters;ABC_transporters,_prokaryotic_type;_metallic_cation,_iron-siderophore_and_vitamin_b12_transporters;Iron_complex_transporter_[mD:m00240]	10662	5172.1	1527.53	2453.01	1509.39	20.0806	12.9069	2906.41	9867.75	12799.5
Transporters;ABC_transporters,_prokaryotic_type;_metallic_cation,_iron-siderophore_and_vitamin_b12_transporters;Manganese/iron_transporter_[mD:m00243]	306.467	118.491	41.5189	48.0421	102.623	0	0	0	0	0
Transporters;ABC_transporters,_prokaryotic_type;_metallic_cation,_iron-siderophore_and_vitamin_b12_transporters;Manganese/iron_transporter_[mD:m00317]	89.8597	0	0	56.0133	33.8464	0	0	0	0	0
Transporters;ABC_transporters,_prokaryotic_type;_metallic_cation,_iron-siderophore_and_vitamin_b12_transporters;Manganese/zinc/iron_transporter_[mD:m00319]	79.5207	1.17551	1.27226	2.35101	74.7219	4.46429	0.496032	2.33918	16.9189	19.2581
Transporters;ABC_transporters,_prokaryotic_type;_metallic_cation,_iron-siderophore_and_vitamin_b12_transporters;Putative_ABC_transporter_[mD:m00247]	465.141	123.929	198.975	63.0261	84.3369	0	0	0	0	0
Transporters;ABC_transporters,_prokaryotic_type;_metallic_cation,_iron-siderophore_and_vitamin_b12_transporters;Zinc/manganese_transporter_[mD:m00244]	299.149	20.8874	117.051	64.4841	96.7262	0	0	146.341	811.764	905.853
Transporters;ABC_transporters,_prokaryotic_type;_metallic_cation,_iron-siderophore_and_vitamin_b12_transporters;Zinc_transporter_[mD:m00242]	4298.71	2853.18	903.102	289.705	293.611	1.83653	9.66898	1.23916	0.619579	13.3642
Transporters;Major_Facilitator_superfamily_(MFS);Drug_transporters;Acriflavin-sensitivity_(Ynfm)_family_[tc:2.A.1.36]	19.7044	0	19.7044	0	0	0	0	0	0	0
Transporters;Major_Facilitator_superfamily_(MFS);Drug_transporters;Drug:h+_antiporter-1_(12_spanner)_(DhA1)_family_[tc:2.A.1.2]	146.75	1.13475	27.2115	88.4498	29.9538	0.0903342	1.08535	187.625	439.664	628.464
Transporters;Major_Facilitator_superfamily_(MFS);Drug_transporters;Drug:h+_antiporter-2_(14_spanner)_(DhA2)_family_[tc:2.A.1.3]	64.0676	0.481696	29.0623	23.9901	10.5336	0	1.28452	3.75578	300.972	306.012
Transporters;Major_Facilitator_superfamily_(MFS);Drug_transporters;Drug:h+_antiporter-3_(12_spanner)_(DhA3)_[tc:2.A.1.21]	978.071	108.575	136.246	325.694	407.556	0	0	12.1212	82.5758	94.697
Transporters;Major_Facilitator_superfamily_(MFS);Drug_transporters;Fosmidomycin_resistance_(Fsr)_family_[tc:2.A.1.35]	268.402	103.175	33.4633	49.2435	82.5211	0	0	0	0	0
Transporters;Major_Facilitator_superfamily_(MFS);Lipid_transporters;Lysophospholipid_transporter_(lplt)_family_[tc:2.A.1.42]	115.09	0	0	114.237	0.852515	0	0	0	0	0
Transporters;Major_Facilitator_superfamily_(MFS);Metal_transporters;Nickel_resistance_(nre)_[tc:2.A.1.31]	374.37	135.349	48.2361	65.5148	125.27	0	0	0	0	0
Transporters;Major_Facilitator_superfamily_(MFS);Metal_transporters;Putative_bacteriochlorophyll_delivery_(bcD)_family_[tc:2.A.1.41]	0	0	0	0	0	0	0.716846	1763.05	6379.9	8143.67
Transporters;Major_Facilitator_superfamily_(MFS);Nitrate/nitrite_transporters;Nitrate/nitrite_porter_(nnp)_family_[tc:2.A.1.8]	9030.03	330.824	1596.81	4578.7	2523.7	0	0	0	0	0
Transporters;Major_Facilitator_superfamily_(MFS);Organic_acid_transporters;Anion:cation_symporter_(Acs)_family_[tc:2.A.1.14]	0.755858	0	0	0.755858	0	0.632111	0	102.661	270.106	373.399
Transporters;Major_Facilitator_superfamily_(MFS);Organic_acid_transporters;Cyanate_porter_(cp)_family_[tc:2.A.1.17]	0	0	0	0	0	0	0	45.2675	400.823	446.091
Transporters;Major_Facilitator_superfamily_(MFS);Organic_acid_transporters;Metabolite:h+_symporter_(mhs)_family_[tc:2.A.1.6]	0	0	0	0	0	0.519211	3.11526	0	53.3437	56.9782
Transporters;Major_Facilitator_superfamily_(MFS);Organic_acid_transporters;Oxalate:formate_antiporter_(oFA)_family_[tc:2.A.1.11]	366.587	8.70942	3.16706	171.021	183.69	0	0	0	0	0
Transporters;Major_Facilitator_superfamily_(MFS);Organic_acid_transporters;Phenylproprionate_permease_(ppp)_[tc:2.A.1.27]	519.162	37.2294	348.918	124.357	8.65801	0	0.861326	903.109	2734.58	3638.55
Transporters;Major_Facilitator_superfamily_(MFS);Phosphate_and_organophosphate_transporters;Organophosphate:pi_antiporter_(opA)_family_[tc:2.A.1.4]	0	0	0	0	0	2.34996	0.542299	0	0	2.89226
Transporters;Major_Facilitator_superfamily_(MFS);Protein_transporters;Peptide-acetyl-coA_transporter_(pAt)_[tc:2.A.1.25]	3165.59	806.25	613.301	1253.38	492.659	0	1.4674	2114.08	6428.78	8544.33
Transporters;Major_Facilitator_superfamily_(MFS);Sugar_transporters;Fucose:h+_symporter_(Fhs)_family_[tc:2.A.1.7]	207.788	0.401606	1.17774	139.723	66.4862	0.405515	2.02758	264.078	416.572	683.083
Transporters;Major_Facilitator_superfamily_(MFS);Sugar_transporters;Nucleoside:h+_symporter_(nhs)_family_[tc:2.A.1.10]	0	0	0	0	0	0	0	748.201	127.098	875.3
Transporters;Major_Facilitator_superfamily_(MFS);Sugar_transporters;Purine_transporter_(AzgA)_family_[tc:2.A.1.40]	398.53	18.1406	4.53515	315.73	60.124	0	0	14.8148	510.438	525.253
Transporters;Major_Facilitator_superfamily_(MFS);Sugar_transporters;Sugar_porter_(sp)_family_[tc:2.A.1.1]	0	0	0	0	0	0	0	0.1155	2.31	2.4255
Transporters;Major_Facilitator_superfamily_(MFS);Unknown_transporters;Unknown_major_facilitator-1_(UmF1)_[tc:2.A.1.24]	5418.87	2625.55	487.701	1541.74	763.877	3.07949	0.773395	1189.45	1791.72	2985.02
Transporters;Phosphotransferase_system_(pts);Enzyme_I_and_hpr;Ascorbate-specific_II_component_[mD:m00283]	2867.46	83.4121	273.785	1597.06	913.205	0	0	651.751	2244.81	2940.8
Transporters;Phosphotransferase_system_(pts);Enzyme_I_and_hpr;Cellobiose-specific_II_component_[mD:m00275]	69.7469	0	0	68.1288	0	0	0	0	0	0
Transporters;Phosphotransferase_system_(pts);Enzyme_I_and_hpr;Enzyme_I	1909.81	1007.74	538.896	193.111	170.065	12.7594	6.02367	932.551	3888.05	4839.39
Transporters;Phosphotransferase_system_(pts);Enzyme_I_and_hpr;Fructose-specific_II_component_[mD:m00273]	8.77193	0	0	8.77193	0	0	0	0	0	0
Transporters;Phosphotransferase_system_(pts);Enzyme_I_and_hpr;Mannitol-specific_II_component_[mD:m00274]	40.2483	0	0	40.2483	0	3.125	0	0.520833	0	3.64583
Transporters;Phosphotransferase_system_(pts);Enzyme_I_and_hpr;Mannose-specific_II_component_[mD:m00276]	2173.02	1801.53	266.489	39.0295	66.4899	0	0	0	0	0
Transporters;Phosphotransferase_system_(pts);Enzyme_I_and_hpr;N-acetylglucosamine-specific_II_component_[mD:m00267]	145.479	0.712251	0.712251	123.399	20.6553	0	0	0	0	0
Transporters;Phosphotransferase_system_(pts);Enzyme_I_and_hpr;N-acetylmuramic_acid-specific_II_component_[mD:m00303]	114.451	0	0	114.451	0	0	0	0	0	0
Transporters;Phosphotransferase_system_(pts);Enzyme_I_and_hpr;Nitrogen_regulatory_II_component	5255.54	1178.53	513.51	2306.81	1256.69	37.6344	1.90476	1279.9	4608.31	5927.74
Transporters;Phosphotransferase_system_(pts);Enzyme_I_and_hpr;Phosphocarrier_protein_hpr	3463.3	650.53	436.451	1670.55	705.771	24.7904	13.3669	750.854	2750.02	3539.03
Transporters;Phosphotransferase_system_(pts);Enzyme_I_and_hpr;Sucrose-specific_II_component_[mD:m00269]	12.9803	0	0	12.9803	0	0	0	0	0	0
Transporters;Phosphotransferase_system_(pts);Enzyme_I_and_hpr;Trehalose-specific_II_component_[mD:m00270]	107.848	0	0	107.848	0	0	0	0	0	0
Utililization_of_sugar,_conversion_of_pentose_to_EMP_pathway_intermediates;Hexose	1068.86	0	0	761.133	187.457	0	0	651.488	1660.64	2312.13
Utililization_of_sugar,_conversion_of_pentose_to_EMP_pathway_intermediates;Pentose	9037.83	3669.55	1425.91	2667.04	1275.33	2.44085	0	0	0	0

## Sheet: ESOM percentage FOAM
Supplemental File 7. Total coverage of predicted pathways.
In this worksheet, values are the percentages of FPK coverage partitioned into each ESOM bin.
# Pathway	combined-spring (total RPK coverage)	ESOM Bin 1 Methanobacteriaceae (RPK coverage as percentage of combined-spring)	ESOM Bin 2 Comamonadaceae / Xanthomonadaceae (RPK coverage as percentage of combined-spring)	ESOM Bin 3 Bacteroidetes (RPK coverage as percentage of combined-spring)	ESOM Bin 4 Methylococcaceae (RPK coverage as percentage of combined-spring)	ESOM Bin 5 Desulfovibrionales (RPK coverage as percentage of combined-spring)
Transporters;ABC_transporters,_prokaryotic_type;ABC-2_type_and_other_transporters;Uncharacterized_ABC_transporter_[mD:m00258]	27759.6	0.00688649	0	0	0.0197179	0.0853294
Transporters;ABC_transporters,_prokaryotic_type;ABC-2_type_and_other_transporters;ABC-2_type_transporter_[mD:m00254]	21943.7	0.0117408	0	0.0201495	0.0110947	0
Cellular_response_to_stress;Regulation_of_stress-activated_protein_kinase_signaling_cascade	20017.3	0	0	0	0.00632489	0.130818
Amino_acid_utilization_biosynthesis_metabolism;Transamination	16379.6	0.0107522	0.00676682	0	0	0
Transporters;ABC_transporters,_prokaryotic_type;ABC-2_type_and_other_transporters;Cell_division_transporter_[mD:m00256]	15358.5	0	0	0.00611903	0.0364099	0.167109
Transporters;ABC_transporters,_prokaryotic_type;Monosaccharide_transporters;Phosphate_transporter_[mD:m00222]	14451.2	0	0.0191329	0.0149049	0.043547	0.181336
Embden_Meyerhof-Parnos_(EMP);EMP	12218.9	0	0	0	0.0180281	0
Transporters;ABC_transporters,_prokaryotic_type;PEPtide_and_nickel_transporters;PEPtides/nickel_transporter_[mD:m00239]	12033.9	0	0.00161328	0.00597744	0	0
Transporters;ABC_transporters,_prokaryotic_type;Oligosaccharide_and_polyol_transporters;Putative_ABC_transporter_[mD:m00210]	11933.7	0	0.00428878	0	0.023768	0.196058
Embden_Meyerhof-Parnos_(EMP);Glycolysis_III_(EMP)	11786.8	0.00378502	0.00664166	0	0	0
Gluconeogenesis;Gluconeogenesis_in_archea	11225.6	0	0	0	0	0
Transporters;ABC_transporters,_prokaryotic_type;_metallic_cation,_iron-siderophore_and_vitamin_b12_transporters;Iron_complex_transporter_[mD:m00240]	10662	0.0783108	0.00114232	0	0	0.203175
Fermentation;Acetoin_biosynthesis;(R)-acetoin_biosynthesis_I	10513.3	0	0	0	0.0581044	0
Fermentation;Acetoin_biosynthesis;(s)-acetoin_biosynthesis	10513.3	0.00722488	0	0	0.0581044	0
Fermentation;Acetoin_biosynthesis;Meso-butanediol_biosynthesis_II	10513.3	0	0	0	0.0581044	0
Saccharide_and_derivated_synthesis;Polysaccharide_biosynthesis_and_assembly_of_cell_surface_structure;Murein	10475.1	0	0	0	0.0359474	0
Embden_Meyerhof-Parnos_(EMP);EMP__in_archea	10066	0	0	0	0	0
Amino_acid_utilization_biosynthesis_metabolism;D-glutamine_and_D-glutamate_metabolism	9150.3	0	0	0	0	0
Transporters;ABC_transporters,_prokaryotic_type;Monosaccharide_transporters;Phosphonate_transporter_[mD:m00223]	9072.03	0.107333	0	0	0	0
Utililization_of_sugar,_conversion_of_pentose_to_EMP_pathway_intermediates;Pentose	9037.83	0.00390098	0	0	0	0.118877
Transporters;Major_Facilitator_superfamily_(MFS);Nitrate/nitrite_transporters;Nitrate/nitrite_porter_(nnp)_family_[tc:2.A.1.8]	9030.03	0	0.0234391	0	0	0
Methylotrophy;Formaldehyde_oxidation_(tetrahydrofolate_pathway)	8710.12	0	0	0	0.0537325	0.176943
Transporters;ABC_transporters,_prokaryotic_type;Mineral_and_organic_ion_transporters;Iron(III)_transporter_[mD:m00190]	8399.68	0.115513	0	0	0	0.301984
Methylotrophy;Serine_pathway_for_formaldehyde_fixation	8167.48	0	0	0	0.063421	0
Transporters;ABC_transporters,_prokaryotic_type;Phosphate_and_amino_acid_transporters;Branched-chain_amino_acid_transporter_[mD:m00237]	7785.03	0	0.0384853	0	0	0
Transporters;ABC_transporters,_prokaryotic_type;Monosaccharide_transporters;Putative_phosphonate_transporter_[mD:m00224]	7455.51	0.131059	0	0	0	0
Transporters;ABC_transporters,_prokaryotic_type;ABC-2_type_and_other_transporters;Lipopolysaccharide_transporter_[mD:m00250]	7449.62	0	0	0	0	0
Transporters;ABC_transporters,_prokaryotic_type;ABC-2_type_and_other_transporters;Lipoprotein-releasing_transporter_[mD:m00255]	7063.02	0	0.0157314	0	0.0304965	0.282745
Amino_acid_utilization_biosynthesis_metabolism;Valine,_leucine_and_isoleucine_biosynthesis	6915.13	0.0210297	0.0148624	0	0.0261836	0.13402
Methylotrophy;RuMP_pathway_for_formaldehyde_fixation_(first_two_steps_are_common_to_both_RuMP_pathway_variants)	6599.27	0	0	0	0.0881801	0
Amino_acid_utilization_biosynthesis_metabolism;Histidine_biosynthesis,_pRpp_=>_histidine	6535.71	0.0321079	0	0.00104703	0.0350186	0.214263
Transporters;ABC_transporters,_prokaryotic_type;ABC-2_type_and_other_transporters;Lipopolysaccharide_transporter_[mD:m00320]	6414.04	0.0217797	0.0126108	0.0393286	0.0241286	0.422113
Sulfur_compounds_metabolism;Chemoautotrophic_oxidation_of_sulfur_compounds;Sulfide_oxidation_III_or_sulfur_oxidation_I_(sulfur_dioxygenase)	6262.59	0	0	0	0	0
Fatty_acid_oxidation;Fatty_acid_beta-oxidation_III_(unsaturated)	6028.61	0	0	0	0	0
Fermentation;Pyruvate_Fermentation;Pyruvate_fermentation_to_lactate	5915.1	0	0	0	0	0.0883872
Transporters;ABC_transporters,_prokaryotic_type;Mineral_and_organic_ion_transporters;Sulfonate/nitrate/taurine_transporter_[mD:m00188]	5856.66	0.158984	0	0	0	0
Gluconeogenesis;Gluconeogenesis	5818.44	0.00794787	0	0.0191014	0	0
TCA_cycle;Reductive_TCA_cycle	5766.26	0	0	0	0	0
Transporters;Major_Facilitator_superfamily_(MFS);Unknown_transporters;Unknown_major_facilitator-1_(UmF1)_[tc:2.A.1.24]	5418.87	0	0	0	0	0.446456
Fermentation;Pyruvate_Fermentation;Pyruvate_fermentation_to_propionate_II_(acrylate_pathway)	5382	0	0	0	0	0
Amino_acid_utilization_biosynthesis_metabolism;Lysine_biosynthesis	5361.88	0.0148504	0.00340333	0.00852897	0.0340365	0.12341
Nucleic_acid_metabolism;Pyrimidine_metabolism	5258.08	0.0238687	0.00454629	0.00478986	0.024807	0.107612
Transporters;Phosphotransferase_system_(pts);Enzyme_I_and_hpr;Nitrogen_regulatory_II_component	5255.54	0	0.045536	0	0	0.245613
Transporters;ABC_transporters,_prokaryotic_type;PEPtide_and_nickel_transporters;Microcin_c_transporter_[mD:m00349]	5156.16	0	0.0557201	0	0	0.485508
Fermentation;Pyruvate_Fermentation;Pyruvate_fermentation_to_acetate_II	5140.48	0	0	0	0	0
Fermentation;Pyruvate_Fermentation;Pyruvate_fermentation_to_acetate_and_lactate_II	5140.48	0	0	0	0	0
Homoacetogenesis;Acetate_formation_from_acetyl-coA_I	5026.63	0.0464474	0	0	0	0.4468
Superpathway_of_thiosulfate_metabolism_(Desulfovibrio_sulfodismutans)	4995.09	0	0	0	0	0
TCA_cycle;TCA_cycle	4889.14	0	0.00995309	0.0201171	0.0336638	0
Embden_Meyerhof-Parnos_(EMP);EMP_modified_pathway	4846.03	0	0	0	0	0
Fermentation;Pyruvate_Fermentation;Pyruvate_fermentation_to_acetate_VIII	4822.75	0	0	0	0	0
Fatty_acid_oxidation;Fatty_acid_activation	4794.59	0	0	0	0	0
Sulfur_compounds_metabolism;Sulfur_compounds_cycle;Sulfate_reduction_(dissimilatory)	4695.22	0	0	0	0	0.241407
Transporters;ABC_transporters,_prokaryotic_type;ABC-2_type_and_other_transporters;Orphan_ABC_Atpase	4693.25	0	0	0.049408	0.049408	0.526083
Fatty_acid_oxidation;Fatty_acid_beta-oxidation_IV_(unsaturated)	4625.72	0	0	0	0	0
Amino_acid_utilization_biosynthesis_metabolism;Amino_acid_biosynthesis_precursor_pyruvate_and_oxaloacetate;Glutamate	4596.86	0	0	0	0	0
Amino_acid_utilization_biosynthesis_metabolism;D-arginine_and_D-ornithine_metabolism	4539.4	0.0562173	0	0	0.114862	0
Transporters;ABC_transporters,_prokaryotic_type;ABC-2_type_and_other_transporters;Heme_transporter_[mD:m00259]	4523.42	0	0	0.0285421	0.0235836	0
Fermentation;Pyruvate_Fermentation;Pyruvate_fermentation_to_acetate_V	4509.64	0	0	0	0	0
Fermentation;Pyruvate_Fermentation;Pyruvate_fermentation_to_acetate_VI	4509.64	0	0	0	0	0
Amino_acid_utilization_biosynthesis_metabolism;Amino_acid_biosynthesis_precursor_pyruvate_and_oxaloacetate;Cysteine_and_methionine	4442.61	0	0	0.0079422	0	0.117895
Fermentation;Homolactic_fermentation	4430.89	0	0	0	0	0
Fermentation;Lysine_fermentation_to_acetate_and_butyrate	4316.02	0	0.00682735	0	0	0
Transporters;ABC_transporters,_prokaryotic_type;_metallic_cation,_iron-siderophore_and_vitamin_b12_transporters;Zinc_transporter_[mD:m00242]	4298.71	0	0	0	0	0
Amino_acid_utilization_biosynthesis_metabolism;Alanine,_aspartate_and_glutamate_metabolism_(contain_asparagin_as_well)	4249.32	0.0159028	0.0118281	0.0117694	0.0435429	0
Nitrogen_cycle;Ammonia_assimilation	4228.48	0	0	0	0	0
Amino_acid_utilization_biosynthesis_metabolism;Cysteine_and_methionine_metabolism	4215.02	0.0200691	0.0042732	0.00763292	0.0291745	0.0775118
Fermentation;Pyruvate_Fermentation;Pyruvate_fermentation_to_acetate_VII	4171.86	0	0	0	0	0
Amino_acid_utilization_biosynthesis_metabolism;Methionine_degradation	4079.36	0	0	0	0	0
Amino_acid_utilization_biosynthesis_metabolism;Phenylalanine,_tyrosine_and_tryptophan_biosynthesis	4078.73	0	0.00296152	0.00548548	0.0183538	0.276086
Fermentation;Bifidobacterium_shunt	4034.18	0	0	0	0	0.20203
Methylotrophy;Formaldehyde_oxidation_(glutathione-dependent)	4021	0	0.0169676	0	0.132368	0
Nucleic_acid_metabolism;Purine_metabolism	3942.13	0.017767	0.0054162	0.0052704	0.0279474	0.0991577
Amino_acid_utilization_biosynthesis_metabolism;Amino_acid_biosynthesis_precursor_pyruvate_and_oxaloacetate;Oxaloacetate_to_lysine	3921.55	0.0112627	0	0.00964314	0.0374235	0
Amino_acid_utilization_biosynthesis_metabolism;Methionine_biosynthesis	3909.83	0	0	0	0	0
Transporters;ABC_transporters,_prokaryotic_type;_metallic_cation,_iron-siderophore_and_vitamin_b12_transporters;Cobalt_transporter_[mD:m00245]	3901.67	0.235021	0	0	0	0.60984
Methanogenesis;From_acetate	3732.34	0.053792	0	0	0.0131541	0.426565
Fermentation;Pyruvate_Fermentation;Pyruvate_fermentation_to_acetate_and_alanine	3726.55	0	0	0	0	0
Fermentation;Pyruvate_Fermentation;Pyruvate_fermentation_to_ethanol_III	3713.03	0	0	0	0	0
Cellular_response_to_stress;Response_to_oxidative_stress	3667.7	0	0	0	0.0213815	0
Amino_acid_utilization_biosynthesis_metabolism;Oxydation_deamination	3624.21	0	0	0	0	0
Fatty_acid_oxidation;Fatty_acid_beta-oxidation_I	3603.64	0	0.0281269	0.0138563	0.0118547	0.180223
Amino_acid_utilization_biosynthesis_metabolism;Amino_acid_biosynthesis_precursor_pyruvate_and_oxaloacetate;Pyruvate_to_leucine	3590.82	0	0	0	0	0
Transporters;Phosphotransferase_system_(pts);Enzyme_I_and_hpr;Phosphocarrier_protein_hpr	3463.3	0	0.0205472	0	0	0.199642
Transporters;ABC_transporters,_prokaryotic_type;Mineral_and_organic_ion_transporters;Sulfate_transporter_[mD:m00185]	3462.87	0	0	0	0	0
TCA_cycle;Incomplete_TCA_fork	3430.84	0	0	0	0	0
Sulfur_compounds_metabolism;Chemoautotrophic_oxidation_of_sulfur_compounds;Superpathway_of_sulfur_metabolism_(Desulfocapsa_sulfoexigens)	3408.93	0	0	0	0	0
Fermentation;Heterolactic_fermentation	3397.21	0.00685947	0	0.00896513	0	0
Cellular_response_to_stress;Cellular_response_to_oxidative_stress	3326.22	0	0	0.0208783	0.05596	0
TCA_cycle;Replenishment_of_TCA_cycle_intermediates_(necessary_because_some_intermediates_serve_as_precursors_for_biosysnthesis)	3296.98	0	0	0	0.18339	0
Transporters;ABC_transporters,_prokaryotic_type;Mineral_and_organic_ion_transporters;Putative_tungstate_transporter_[mD:m00186]	3202.47	0	0	0.0617549	0	0
Transporters;Major_Facilitator_superfamily_(MFS);Protein_transporters;Peptide-acetyl-coA_transporter_(pAt)_[tc:2.A.1.25]	3165.59	0	0	0	0.155056	0
Sulfur_compounds_metabolism;Sulfur_compounds_cycle;Thiosulfate_disproportionation	3134.12	0	0	0	0	0
Nitrogen_cycle;Nitrogenated_compounds_Reduction;Assimilatory_nitrate_reduction;Nitrate_to_ammonia	3133.79	0	0	0	0	0
Amino_acid_utilization_biosynthesis_metabolism;Glycine,_serine_and_threonine_metabolism	2993.94	0.00579111	0.00624534	0.00710443	0.0461469	0.114331
Fermentation;Pyruvate_Fermentation;Pyruvate_fermentation_to_acetate_and_lactate_I	2987.29	0	0	0	0	0
Transporters;ABC_transporters,_prokaryotic_type;Monosaccharide_transporters;Simple_sugar_transporter_[mD:m00221]	2940.02	0	0.0519778	0	0	0
Sulfur_compounds_metabolism;Sulfur_compounds_cycle;Sulfite_oxidation	2932.94	0	0	0	0	0
Cellular_response_to_stress;Response_to_nitrosative_stress	2920.32	0.0208346	0	0.00831565	0	0.0611468
Transporters;Phosphotransferase_system_(pts);Enzyme_I_and_hpr;Ascorbate-specific_II_component_[mD:m00283]	2867.46	0	0	0	0	0
Amino_acid_utilization_biosynthesis_metabolism;Amino_acid_biosynthesis_precursor_pyruvate_and_oxaloacetate;Histidine	2850.2	0	0	0	0	0.119624
Sulfur_compounds_metabolism;Sulfur_compounds_cycle;Sulfate_reduction_(assimilatory)	2846.21	0	0	0.0469463	0.113789	0
Sulfur_compounds_metabolism;Sulfur_compounds_cycle;Sulfur_disproportionation	2843.36	0	0.0780802	0	0	0
Sulfur_compounds_metabolism;Sulfur_compounds_cycle;Sulfolactate_degradation	2813.86	0	0	0	0	0
Transporters;ABC_transporters,_prokaryotic_type;ABC-2_type_and_other_transporters;Lipooligosaccharide_transporter_[mD:m00252]	2774.89	0	0	0	0	0
Amino_acid_utilization_biosynthesis_metabolism;Arginine_and_proline_metabolism	2755.49	0.0116485	0	0.0148631	0.0200681	0.134513
Transporters;ABC_transporters,_prokaryotic_type;Oligosaccharide_and_polyol_transporters;Multiple_sugar_transporter_[mD:m00207]	2412.25	0	0	0	0	0
Transporters;ABC_transporters,_prokaryotic_type;Phosphate_and_amino_acid_transporters;Arginine/ornithine_transporter_[mD:m00235]	2374.52	0	0	0	0	0
Methylotrophy;Methane_oxidation_to_cO2	2360.52	0	0	0	0.109908	0
Methanogenesis;From_dimethylamine	2336.22	0	0	0	0	0
Methanogenesis;From_methanol	2336.22	0.0731611	0.0600309	0	0	0
Methanogenesis;From_methylamine	2336.22	0	0	0	0	0
Methanogenesis;From_trimethylamine	2336.22	0	0	0	0	0
Amino_acid_utilization_biosynthesis_metabolism;Amino_acid_biosynthesis_precursor_pyruvate_and_oxaloacetate;PEP	2299.63	0.00938899	0	0	0.0423706	0.178453
Amino_acid_utilization_biosynthesis_metabolism;Valine,_leucine_and_isoleucine_degradation	2257.28	0	0.0162775	0.0161417	0.0422342	0
Transporters;ABC_transporters,_prokaryotic_type;Mineral_and_organic_ion_transporters;Molybdate_transporter_[mD:m00189]	2203.34	0	0	0	0.160261	0
Nitrogen_cycle;Nitrogenated_compounds_Reduction;Hydroxylamine_reduction	2185.45	0.12104	0	0	0	0
Transporters;Phosphotransferase_system_(pts);Enzyme_I_and_hpr;Mannose-specific_II_component_[mD:m00276]	2173.02	0	0	0	0	1
Saccharide_and_derivated_synthesis;Polysaccharide_biosynthesis_and_assembly_of_cell_surface_structure;Peptidoglycan_biosynthesis	2084.78	0	0.00393134	0.011113	0.0275732	0
Hydrogen_metabolism;Hydrogen_production	2013.03	0	0.0396778	0.0325022	0.0378201	0.326509
Nitrogen_cycle;Nitrogenated_compounds_Reduction;Denitrification;Nitrate_to_nitrite	1925.5	0	0	0	0	0
Methanogenesis;From_formate	1915.7	0.105358	0	0	0	0
Transporters;Phosphotransferase_system_(pts);Enzyme_I_and_hpr;Enzyme_I	1909.81	0	0	0	0	0.600683
Transporters;ABC_transporters,_prokaryotic_type;Phosphate_and_amino_acid_transporters;Urea_transporter_[mD:m00323]	1844.87	0	0.132991	0	0	0
Amino_acid_utilization_biosynthesis_metabolism;Phenylalanine_metabolism	1770.08	0.00901992	0.0127247	0	0	0.128727
Amino_acid_utilization_biosynthesis_metabolism;Histidine_degradation	1738.92	0	0	0	0	0
Fermentation;Mixed_acid_fermentation	1715.16	0	0	0	0	0
Fatty_acid_oxidation;Fatty_acid_omega-oxidation	1639.14	0	0	0	0	0
Transporters;ABC_transporters,_prokaryotic_type;Oligosaccharide_and_polyol_transporters;Sn-glycerol_3-phosphate_transporter_[mD:m00198]	1589.13	0	0	0	0	0
Methylotrophy;Formaldehyde_oxidation_(h4mpt_pathway)	1563.63	0	0	0	0.247135	0
Hydrogen_metabolism;Hydrogen_oxidation_aerobic	1484.08	0	0	0	0	0
Hydrolysis_of_polymers;Starch	1447.71	0.0200579	0	0	0.0526248	0.219146
Hydrolysis_of_polymers;Galactose	1410.23	0	0	0.0119031	0	0
Fermentation;Acetylene_degradation	1370.06	0	0	0	0	0
Cellular_response_to_stress;Cellular_response_to_stress	1336.07	0.00690152	0.00515027	0	0.0387139	0.0621279
Methanogenesis;From_CO2	1306.35	0	0	0	0	0
Fermentation;Glutamate_degradation_V_(via_hydroxyglutarate)	1288.22	0	0	0	0	0
Transporters;ABC_transporters,_prokaryotic_type;Mineral_and_organic_ion_transporters;Putative_spermidine/putrescine_transporter_[mD:m00193]	1280.84	0	0	0	0	0
Transporters;ABC_transporters,_prokaryotic_type;Monosaccharide_transporters;Ribose_transporter_[mD:m00212]	1277.61	0	0	0	0	0
Hydrolysis_of_polymers;Xylose	1257.35	0	0	0.0212316	0.0574996	0
Transporters;ABC_transporters,_prokaryotic_type;Mineral_and_organic_ion_transporters;Putrescine_transporter_[mD:m00300]	1251.76	0	0	0	0	0
Hydrocarbon_degradation;Aromatic_carboxylic_acid_degradation	1244.68	0	0.0232585	0	0	0
Amino_acid_utilization_biosynthesis_metabolism;Tryptophan_metabolism	1200.55	0.0020345	0.0217015	0.0068249	0	0
Methylotrophy;Methanol_oxidation_to_formaldehyde	1172.26	0	0	0	0.290925	0
Saccharide_and_derivated_synthesis;Polysaccharide_biosynthesis_and_assembly_of_cell_surface_structure;Lipopolysaccharide_biosynthesis	1166.46	0.0119406	0.00308877	0.00879319	0.0310233	0.0798483
Hydrocarbon_degradation;Hydrocarbon_degradation	1115.37	0	0	0	0	0
Transporters;ABC_transporters,_prokaryotic_type;Oligosaccharide_and_polyol_transporters;Putative_ABC_transporter_[mD:m00211]	1088.81	0	0	0	0	0
Transporters;ABC_transporters,_prokaryotic_type;Phosphate_and_amino_acid_transporters;Polar_amino_acid_transporter_[mD:m00236]	1080.99	0	0	0	0	0
Utililization_of_sugar,_conversion_of_pentose_to_EMP_pathway_intermediates;Hexose	1068.86	0	0	0	0	0
Carbohydrate_Active_enzyme_-_CAZy;Polysaccharide_lyase	983.956	0	0.017273	0	0	0
Transporters;Major_Facilitator_superfamily_(MFS);Drug_transporters;Drug:h+_antiporter-3_(12_spanner)_(DhA3)_[tc:2.A.1.21]	978.071	0	0	0	0	0
Hydrocarbon_degradation;Other_aromatics_degradation	944.09	0	0.0483509	0	0	0
Carbohydrate_Active_enzyme_-_CAZy;Glycosyltransferase	932.969	0	0	0	0	0
Hydrocarbon_degradation;Polycyclic_aromatic_hydrocarbon_degradation	918.263	0.0236443	0	0	0	0
Saccharide_and_derivated_synthesis;Disaccaride_phosphorylase;Cellobiose	873.911	0	0	0	0	0
Nucleic_acid_metabolism;Degradation_of_purine_bases	870.647	0	0	0	0.0729083	0
Nitrogen_cycle;Nitrification_(aerobic_ammonia_oxydation,_bacterial_and_archea);Ammonia_to_hydroxylamine	831.066	0	0	0	0.806116	0
Transporters;ABC_transporters,_prokaryotic_type;ABC-2_type_and_other_transporters;Sodium_transporter_[mD:m00253]	785.22	0	0	0	0	0
Amino_acid_utilization_biosynthesis_metabolism;Lysine_degradation_VIII	777.784	0	0	0	0	0
Cellular_response_to_stress;Cellular_response_to_osmotic_stress	721.481	0	0	0.00654013	0.0494543	0.0822447
Transporters;ABC_transporters,_prokaryotic_type;ABC-2_type_and_other_transporters;Capsular_polysaccharide_transporter_[mD:m00249]	719.745	0	0	0	0.168881	0
Hydrolysis_of_polymers;Mannose	684.461	0	0	0	0	0
Nitrogen_cycle;Nitrogen_Fixation	664.609	0.156414	0.0192334	0	0	0
Fermentation;Pyruvate_Fermentation;Pyruvate_fermentation_to_acetate_III	639.044	0	0	0.567122	0	0
Carbohydrate_Active_enzyme_-_CAZy;Glycoside_hydrolase	584.409	0.000578161	0	0.0193267	0.0911301	0.14444
Cellular_response_to_stress;Response_to_osmotic_stress	574.05	0.00764124	0.0149962	0	0.0286602	0.0281909
Transporters;Major_Facilitator_superfamily_(MFS);Organic_acid_transporters;Phenylproprionate_permease_(ppp)_[tc:2.A.1.27]	519.162	0	0	0	0	0
Transporters;ABC_transporters,_prokaryotic_type;_metallic_cation,_iron-siderophore_and_vitamin_b12_transporters;Putative_ABC_transporter_[mD:m00247]	465.141	0	0	0	0	0
Transporters;ABC_transporters,_prokaryotic_type;Oligosaccharide_and_polyol_transporters;Multiple_sugar_transporter_[mD:m00196]	429.63	0	0	0	0	0
Transporters;Major_Facilitator_superfamily_(MFS);Sugar_transporters;Purine_transporter_(AzgA)_family_[tc:2.A.1.40]	398.53	0	0	0	0	0
Transporters;Major_Facilitator_superfamily_(MFS);Metal_transporters;Nickel_resistance_(nre)_[tc:2.A.1.31]	374.37	0	0	0	0	0
Transporters;Major_Facilitator_superfamily_(MFS);Organic_acid_transporters;Oxalate:formate_antiporter_(oFA)_family_[tc:2.A.1.11]	366.587	0	0	0	0	0
Methylotrophy;Methylamine_to_formaldehyde	348.179	0	0	0	0	0
Transporters;ABC_transporters,_prokaryotic_type;ABC-2_type_and_other_transporters;Multidrug/hemolysin_transporter_[mD:m00298]	323.925	0	0	0	0	0
Transporters;ABC_transporters,_prokaryotic_type;Monosaccharide_transporters;Putative_multiple_sugar_transporter_[mD:m00216]	318.789	0.137582	0	0	0	0
Fermentation;Pyruvate_Fermentation;Pyruvate_fermentation_to_ethanol_I	314.296	0	0	0	0	0
Nitrogen_cycle;Nitrogenated_compounds_Reduction;Dissimilatory_nitrate_reduction;Nitrate_to_ammonia	307.864	0	0	0	0	0
Transporters;ABC_transporters,_prokaryotic_type;_metallic_cation,_iron-siderophore_and_vitamin_b12_transporters;Manganese/iron_transporter_[mD:m00243]	306.467	0	0	0	0	0
Hydrogen_metabolism;Hydrogen_production_VII_(chlorophyta,_cyanobacteria)	304.81	0	0.144876	0	0	0
Transporters;ABC_transporters,_prokaryotic_type;_metallic_cation,_iron-siderophore_and_vitamin_b12_transporters;Zinc/manganese_transporter_[mD:m00244]	299.149	0	0	0	0	0
Transporters;ABC_transporters,_prokaryotic_type;Oligosaccharide_and_polyol_transporters;Alpha-glucoside_transporter_[mD:m00201]	277.368	0	0	0	0	0
Transporters;Major_Facilitator_superfamily_(MFS);Drug_transporters;Fosmidomycin_resistance_(Fsr)_family_[tc:2.A.1.35]	268.402	0	0	0	0	0
Transporters;ABC_transporters,_prokaryotic_type;Mineral_and_organic_ion_transporters;Osmoprotectant_transporter_[mD:m00209]	251.285	0	0	0	0	0
Fermentation;Pyruvate_Fermentation;Pyruvate_fermentation_to_ethanol_II	237.201	0	0	0	0	0
Cellular_response_to_stress;Trehalose_metabolism_in_response_to_cold_stress	223.03	0	0	0	0	0
Hydrolysis_of_polymers;Arabinose	214.127	0	0	0	0	0
Nucleic_acid_metabolism;Degradation_of_pyrimidine_bases	212.419	0	0	0	0	0
Transporters;Major_Facilitator_superfamily_(MFS);Sugar_transporters;Fucose:h+_symporter_(Fhs)_family_[tc:2.A.1.7]	207.788	0	0	0.60109	0	0
Transporters;ABC_transporters,_prokaryotic_type;Oligosaccharide_and_polyol_transporters;Maltose/maltodextrin_transporter_[mD:m00194]	191.414	0.153333	0	0	0	0
Transporters;ABC_transporters,_prokaryotic_type;Phosphate_and_amino_acid_transporters;General_l-amino_acid_transporter_[mD:m00232]	172.345	0	0	0	0	0
Nitrogen_cycle;Nitrogenated_compounds_Reduction;Denitrification;Nitrite_oxide_to_nitrous_oxide	162.832	0	0	0	0	0
Transporters;Major_Facilitator_superfamily_(MFS);Drug_transporters;Drug:h+_antiporter-1_(12_spanner)_(DhA1)_family_[tc:2.A.1.2]	146.75	0	0	0	0	0
Transporters;Phosphotransferase_system_(pts);Enzyme_I_and_hpr;N-acetylglucosamine-specific_II_component_[mD:m00267]	145.479	0	0	0	0	0
Transporters;ABC_transporters,_prokaryotic_type;Mineral_and_organic_ion_transporters;Spermidine/putrescine_transporter_[mD:m00299]	133.313	0	0	0	0	0
Transporters;Major_Facilitator_superfamily_(MFS);Lipid_transporters;Lysophospholipid_transporter_(lplt)_family_[tc:2.A.1.42]	115.09	0	0	0	0	0
Transporters;Phosphotransferase_system_(pts);Enzyme_I_and_hpr;N-acetylmuramic_acid-specific_II_component_[mD:m00303]	114.451	0	0	0	0	0
Transporters;Phosphotransferase_system_(pts);Enzyme_I_and_hpr;Trehalose-specific_II_component_[mD:m00270]	107.848	0	0	0	0	0
Hydrocarbon_degradation;Chlorinated_aromatics_degradation	96.056	0	0.94702	0	0	0
Transporters;ABC_transporters,_prokaryotic_type;_metallic_cation,_iron-siderophore_and_vitamin_b12_transporters;Manganese/iron_transporter_[mD:m00317]	89.8597	0	0	0	0	0
Transporters;ABC_transporters,_prokaryotic_type;Oligosaccharide_and_polyol_transporters;Sorbitol/mannitol_transporter_[mD:m00200]	84.2503	0	0	0	0	0
Transporters;ABC_transporters,_prokaryotic_type;_metallic_cation,_iron-siderophore_and_vitamin_b12_transporters;Manganese/zinc/iron_transporter_[mD:m00319]	79.5207	0	0	0	0	0
Transporters;Phosphotransferase_system_(pts);Enzyme_I_and_hpr;Cellobiose-specific_II_component_[mD:m00275]	69.7469	0	0	0	0	0
Transporters;ABC_transporters,_prokaryotic_type;Monosaccharide_transporters;D-Xylose_transporter_[mD:m00215]	67.8925	0	0	0	0	0
Transporters;Major_Facilitator_superfamily_(MFS);Drug_transporters;Drug:h+_antiporter-2_(14_spanner)_(DhA2)_family_[tc:2.A.1.3]	64.0676	0	0.456125	0	0	0
Transporters;ABC_transporters,_prokaryotic_type;Monosaccharide_transporters;Rhamnose_transporter_[mD:m00220]	45.3814	0	0	0	0	0
Transporters;ABC_transporters,_prokaryotic_type;Monosaccharide_transporters;Fructose_transporter_[mD:m00218]	41.6218	0	0	0	0	0
Transporters;Phosphotransferase_system_(pts);Enzyme_I_and_hpr;Mannitol-specific_II_component_[mD:m00274]	40.2483	0	0	0	0	0
Transporters;ABC_transporters,_prokaryotic_type;Mineral_and_organic_ion_transporters;Glycine_betaine/proline_transporter_[mD:m00208]	36.3433	0	0	0	0	0
Hydrolysis_of_polymers;Cellulose	34.7796	0	0	0	0	0
Transporters;Major_Facilitator_superfamily_(MFS);Drug_transporters;Acriflavin-sensitivity_(Ynfm)_family_[tc:2.A.1.36]	19.7044	0	0	0	0	0
Homoacetogenesis;Acetate_formation_from_acetyl-coA_II	19.6078	0	0	0	0	0
Transporters;ABC_transporters,_prokaryotic_type;Monosaccharide_transporters;Methyl-galactoside_transporter_[mD:m00214]	19.5726	0	0	0	0	0
Nitrogen_cycle;Nitrogenated_compounds_Reduction;Denitrification;Nitrous_oxide_to_nitrogen	13.6202	0	0	0	0	0
Transporters;Phosphotransferase_system_(pts);Enzyme_I_and_hpr;Sucrose-specific_II_component_[mD:m00269]	12.9803	0	0	0	0	0
Transporters;ABC_transporters,_prokaryotic_type;Mineral_and_organic_ion_transporters;Thiamine_transporter_[mD:m00191]	10.9127	0	0	0	0	0
Transporters;Phosphotransferase_system_(pts);Enzyme_I_and_hpr;Fructose-specific_II_component_[mD:m00273]	8.77193	0	0	0	0	0
Transporters;ABC_transporters,_prokaryotic_type;Phosphate_and_amino_acid_transporters;Glutamate/aspartate_transporter_[mD:m00230]	6.98349	0	0	0	0	0
Transporters;ABC_transporters,_prokaryotic_type;Phosphate_and_amino_acid_transporters;Putative_glutamine_transporter_[mD:m00228]	6.06061	0	0	0	0	0
Transporters;ABC_transporters,_prokaryotic_type;ABC-2_type_and_other_transporters;Teichoic_acid_transporter_[mD:m00251]	5.73301	0	0	0	0	0
Transporters;ABC_transporters,_prokaryotic_type;Phosphate_and_amino_acid_transporters;Neutral_amino_acid_transporter_[mD:m00322]	5.67376	0	0	0	0	0
Transporters;Major_Facilitator_superfamily_(MFS);Organic_acid_transporters;Anion:cation_symporter_(Acs)_family_[tc:2.A.1.14]	0.755858	0	0	0	0	0
