# Supplementary material for: Metagenomic identification of active methanogens and methanotrophs in serpentinite springs of the Voltri Massif, Italy
Source: PeerJ. 2017 Jan 26;5:e2945. doi: 10.7717/peerj.2945 (PMC5274519; doi:10.7717/peerj.2945)
Supplement: File S8 [file peerj-05-2945-s008.xlsx]

## Sheet: FPKM (normalized to mg size)
Supplemental File 8. Total coverage of predicted genes annotated with a KEGG ID of potential interest.
In this worksheet, values are in FPKM (fragments per kilobase of protein length per million mapped read pairs), which is normalized to the length of the predicted protein and also normalized to the number of read pairs mapped to the pooled assembly.
KEGG ID	Description	combined-spring	BR2-spring-2012	BR2-spring-2013	GOR34-spring1-2013b	GOR34-spring3-2012	BR2-river-2012a	BR2-river-2013	GOR34-river-2012a	GOR34-river-2013b	combined_river
-	total mapped fragments (read pairs)	37004773	11059078	4948900	14026682	6970113	275619	401065	7476171	19980281	28133136
K00336	Fe only hydrogenase	52.6817	25.5507	100.716	69.9157	26.942	42.8257	22.4342	173.706	209.823	195.918
K00436	hoxH, NAD-reducing hydrogenase	52.393	47.1011	88.6323	51.4995	36.8567	0	0	0	0	0
K06281	hyaB, hybC NiFe hydrogenase large subunit	22.545	5.87021	92.094	5.64551	33.6296	0	0	0	0	0
K06282	hyaA,hybO NiFe hydrogenase small subunit	27.8171	6.78398	78.7787	10.3153	60.2262	0	0	0	0	0
K18008	hydA NiFe hydrogenase small subunit	11.3233	32.4088	9.50149	0.148992	1.64908	0	0	0	0	0
K00437	hydB NiFe hydrogenase large subunit	64.1531	179.09	58.5489	2.22527	10.3927	0	0	0	0	0
K00532	ferredoxin hydrogenase	0	0	0	0	0	0	0	0	0	0
K00533	ferredoxin hydrogenase large subunit	0.697145	0	0	1.83919	0	0	0	0	0	0
K01601	Rubisco large subunit	17.2823	1.32143	8.57757	20.1922	42.9311	0	0	0	6.04461	4.29291
K10944	pmoA particulate methane monooxygenase	21.1885	0	0.272692	54.2633	3.09786	0	0	0	0	0
K10945	pmoB particulate methane monooxygenase	21.3882	0	0.162693	53.2686	6.23781	0	0	2.81369	0	0.747716
K10946	pmoC particulate methane monooxygenase	23.5285	0	0.80826	58.6501	6.31267	0	0	2.08184	0.0649148	0.599337
K14028	mdh1,mxaF	30.1409	3.98998	68.2137	49.0661	6.51561	0	0	0	0	0
K14029	mdh2,mxaI	38.6187	4.80976	121.096	53.0903	4.57882	0	0	0	0	0
K16157	mmoX	37.98	3.26005	106.209	54.4729	11.434	0	0	0	0	0
K16158	mmoY	28.6089	4.18412	119.473	14.5715	31.096	0	0	0	0	0
K16159	mmoZ	35.2639	2.83681	102.221	40.7	28.2336	0	0	0	0	0
K16160	mmoB	32.901	2.13767	90.7621	38.7644	28.8296	0	0	0	0	0
K16161	mmoC	28.2055	3.72087	108.606	22.5448	21.3591	0	0	0	0	0
K16162	mmoD	34.0128	3.51159	83.0494	55.22	4.91298	0	0	0	0	0
K03520	coxL,cutL	4.50256	0.606748	0.926813	7.52085	7.14864	0	0	125.607	38.7156	60.8752
K00198	cooS	103.752	271.746	124.577	11.899	7.26301	0	0	0	0	0
K14138	acsB	110.018	297.414	123.44	9.58602	5.2704	0	0	0	0	0
K00656	formate c-acetyltransferase	33.5919	45.4358	37.6233	29.0603	21.0571	0	0	0	0	0
K00394	aprA	65.745	144.08	79.1188	11.2845	41.5557	0	0	0	0	0
K00395	aprB	137.972	325.396	135.69	24.0114	71.5526	0	0	0	0	0
K11180	dsrA	134.943	272.413	151.778	28.6925	118.695	0	0	0	0	0
K11181	dsrB	119.167	241.778	141.017	26.6617	95.2711	0	0	0	0	0
K00370	narG	12.4382	3.48283	69.4933	1.66811	7.81071	0	0	0	0	0
K00371	narH	98.1248	7.76522	88.1953	163.559	116.864	0	0	0	0	0
K02567	napA	26.2758	66.318	39.5566	0.775627	4.6301	0	0	0	0	0
K02568	napB	0	0	0	0	0	0	0	0	0	0
K00362	nirB	63.5096	12.3386	72.2072	103.043	58.9665	0	0	52.8253	31.1449	36.1572
K00363	nirD	105.862	0	33.0478	181.99	172.327	0	0	35.8066	9.63417	16.3576
K03385	nrfA	16.6391	0.0605244	0.700721	33.6312	20.0651	0	0	0	0	0
K00368	nirK	0	0	0	0	0	0	0	0	0	0
K04561	norB	4.4003	0	22.2756	3.74947	0	0	0	0	0	0
K02305	norC	2.04433	0	15.2862	0	0	0	0	0	0	0
K00376	nosZ	0.368067	0	0	0.971022	0	0	0	0	0	0
K02586	nifD	12.8985	13.2206	24.5704	1.85178	26.3309	0	0	0	0	0
K02591	nifK	13.3835	17.1331	25.6136	2.46953	20.7142	0	0	0	0	0
K02588	nifH	27.5982	25.9835	23.3156	21.7703	44.9292	0	0	0	0	0
K00531	anfG	0	0	0	0	0	0	0	0	0	0
K10535	hao	0	0	0	0	0	0	0	0	0	0
K00123	formate dehydrogenase	152.735	80.6201	317.632	157.546	140.392	6.17418	13.8124	353.97	398.197	377.123
K00124	formate dehydrogenase	40.9457	4.75174	66.5353	62.2601	37.3103	0	0	171.249	213.768	197.327
K00125	formate dehydrogenase	20.4223	34.0411	29.6963	11.0512	11.0881	0	0	0	0	0
K00126	formate dehydrogenase	132.304	7.86973	169.719	181.8	203.568	0	0	0	3.22287	2.2889
K00127	formate dehydrogenase	49.1803	3.83042	91.5337	75.0432	39.016	3.00846	2.15316	179.54	282.553	248.442
K00200	methanogenesis: Fmd/Fwd	54.7803	16.0444	98.7213	85.7129	22.7927	0	0	0.0807719	0.030223	0.0429291
K00201	methanogenesis: Fmd/Fwd	35.0519	16.1941	91.2423	42.2146	10.6619	0	0	0	0	0
K00202	methanogenesis: Fmd/Fwd	21.7366	23.1082	80.2061	8.01008	5.66926	54.355	28.0153	0	0	0.931899
K00203	methanogenesis: Fmd/Fwd	8.04197	10.5389	16.4855	1.16328	11.9279	0	0	0	0	0
K00204	methanogenesis: Fmd/Fwd	4.11944	9.37316	4.51772	0.289808	3.20766	0	0	0	0	0
K00205	methanogenesis: Fmd/Fwd	14.7501	25.3489	21.4999	1.75218	19.298	0	0	0	0	0
K11260	methanogenesis: Fmd/Fwd	5.80292	4.89794	12.6291	0	14.0699	0	0	0	0	0
K11261	methanogenesis: Fmd/Fwd	18.1003	44.4334	30.9896	1.78511	0	0	0	0	0	0
K00672	methanogenesis: Ftr	12.0544	6.96127	59.6688	2.71137	5.13017	0	0	0	0	0
K01499	methanogenesis: Mch	25.1278	3.51285	74.7729	33.2759	7.77684	0	0	0	0	0
K00319	methanogenesis: Mtd	10.5418	14.743	7.07716	1.11933	25.2978	0	0	0	0	0
K13942	methanogenesis: Hmd	0	0	0	0	0	0	0	0	0	0
K00440	methanogenesis: Frh	1.63378	0	0	0	8.67382	0	0	0	0	0
K00441	methanogenesis: Frh	38.9871	62.7886	54.076	15.623	37.5272	0	0	41.7486	102.978	84.23
K00442	methanogenesis: Frh	0.34207	0	0	0	1.81607	0	0	0	0	0
K00443	methanogenesis: Frh	0.76243	0	0	0	4.04779	0	0	0	0	0
K00320	methanogenesis: Mer	3.81641	4.69488	5.24572	0.666287	7.74707	0	0	0	0	0
K00577	methanogenesis: Mtr	8.10329	14.5031	13.8092	1.29262	7.60369	0	0	0	0	0
K00578	methanogenesis: Mtr	5.70794	10.1465	8.66946	0.705868	6.62896	0	0	0	0	0
K00579	methanogenesis: Mtr	7.2702	11.6099	11.2258	0.528094	11.1439	0	0	0	0	0
K00580	methanogenesis: Mtr	8.82096	17.5094	13.6946	1.18328	6.94528	0	0	0	0	0
K00581	methanogenesis: Mtr	9.22159	19.0043	14.8409	0.72501	6.80873	0	0	0	0	0
K00582	methanogenesis: Mtr	2.21932	3.49463	6.83312	0.344409	0.69309	0	0	0	0	0
K00583	methanogenesis: Mtr	2.966	6.61635	3.28561	0	2.91605	0	0	0	0	0
K00584	methanogenesis: Mtr	6.30549	11.4731	9.99462	0.613271	6.94208	0	0	0	0	0
K00399	methanogenesis: Mcr	6.92785	13.7005	11.879	0.432077	5.73879	0	0	0	0	0
K00401	methanogenesis: Mcr	14.579	26.1027	23	1.69991	16.2338	0	0	0	0	0
K00402	methanogenesis: Mcr	16.567	30.3722	20.5366	1.77538	21.6112	0	0	0	0	0
K03388	methanogenesis: Hdr	117.105	246.036	144.662	40.4735	47.1833	0	0	0	0	0
K03389	methanogenesis: Hdr	90.1735	181.182	95.9468	18.6871	85.5356	0	0	1.49117	0.0557964	0.435895
K03390	methanogenesis: Hdr	77.2402	196.61	71.4178	7.23292	32.8596	0	0	0	0	0
K00925	acetate kinase	145.025	173.685	129.955	127.784	144.947	0	0	86.9215	14.2769	33.2382
K00625	phosphotransacetylase	22.8534	4.67024	69.993	24.2745	15.3741	0	0	86.1938	12.3941	31.7077
K13788	phosphotransacetylase	61.5045	173.644	52.6002	1.99444	9.65988	0	0	0	0	0
K01895	AMP-forming acetyl-CoA synthetase	361.441	668.667	530.801	132.162	215.136	62.4553	34.5667	328.373	396.492	369.958
K00192	Cdh/ACDS	11.1662	13.5863	12.1826	3.09957	22.8378	0	0	0.523858	0.0217795	0.154679
K00193	Cdh/ACDS	24.8439	31.1232	29.1272	11.1075	39.4831	0	0	0	0	0
K00194	Cdh/ACDS	111.555	288.638	128.383	8.37504	26.2816	0	0	0	0	0
K00195	Cdh/ACDS	45.5232	66.1878	53.4261	16.5261	65.4783	0	0	0	0	0
K00196	Cdh/ACDS	20.96	17.4082	23.8747	18.4738	29.5296	0	0	0	0	0
K00197	Cdh/ACDS	127.345	303.092	145.422	22.6835	46.2813	0	0	0	0	0
K00198	Cdh/ACDS	103.752	271.746	124.577	11.899	7.26301	0	0	0	0	0
K14080	methanogenesis: Mta	0	0	0	0	0	0	0	0	0	0
K04480	methanogenesis: Mta	6.17938	7.78047	4.6754	6.50788	4.04578	0	0	0	0	0
K14081	methanogenesis: Mta	4.89843	8.25031	8.1121	0.867308	5.41066	0	0	0	0	0
K14082	methanogenesis: Mtb/Mtm	0	0	0	0	0	0	0	0	0	0
K14083	methanogenesis: Mtb/Mtm	1.20085	1.04571	0.549837	1.55372	1.19909	0	11.124	0	0	0.158583
K14084	methanogenesis: Mtb/Mtm	0.614171	0	0	1.62029	0	0	0	0	0	0
K16176	methanogenesis: Mtb/Mtm	0	0	0	0	0	0	0	0	0	0
K16177	methanogenesis: Mtb/Mtm	0	0	0	0	0	0	0	0	0	0
K16178	methanogenesis: Mtb/Mtm	0	0	0	0	0	0	0	0	0	0
K16179	methanogenesis: Mtb/Mtm	0	0	0	0	0	0	0	0	0	0

## Sheet: FPK (not normalized to mg size)
Supplemental File 8. Total coverage of predicted genes annotated with a KEGG ID of potential interest.
In this worksheet, values are in FPK (fragments per kilobase of protein length), which is normalized to the length of the predicted protein.
KEGG ID	Description	combined-spring	BR2-spring-2012	BR2-spring-2013	GOR34-spring1-2013b	GOR34-spring3-2012	BR2-river-2012a	BR2-river-2013	GOR34-river-2012a	GOR34-river-2013b	combined_river
-	total mapped fragments (read pairs)	37004773	11059078	4948900	14026682	6970113	275619	401065	7476171	19980281	28133136
K00336	Fe only hydrogenase	1949.47	282.567	498.432	980.685	187.789	11.8036	8.99759	1298.66	4192.33	5511.79
K00436	hoxH, NAD-reducing hydrogenase	1938.79	520.895	438.632	722.367	256.895	0	0	0	0	0
K06281	hyaB, hybC NiFe hydrogenase large subunit	834.273	64.9191	455.764	79.1877	234.402	0	0	0	0	0
K06282	hyaA,hybO NiFe hydrogenase small subunit	1029.37	75.0245	389.868	144.689	419.783	0	0	0	0	0
K18008	hydA NiFe hydrogenase small subunit	419.018	358.412	47.0219	2.08986	11.4943	0	0	0	0	0
K00437	hydB NiFe hydrogenase large subunit	2373.97	1980.57	289.753	31.2132	72.4382	0	0	0	0	0
K00532	ferredoxin hydrogenase	0	0	0	0	0	0	0	0	0	0
K00533	ferredoxin hydrogenase large subunit	25.7977	0	0	25.7977	0	0	0	0	0	0
K01601	Rubisco large subunit	639.527	14.6138	42.4495	283.229	299.235	0	0	0	120.773	120.773
K10944	pmoA particulate methane monooxygenase	784.076	0	1.34953	761.134	21.5924	0	0	0	0	0
K10945	pmoB particulate methane monooxygenase	791.465	0	0.805153	747.182	43.4783	0	0	21.0356	0	21.0356
K10946	pmoC particulate methane monooxygenase	870.667	0	4	822.667	44	0	0	15.5642	1.29702	16.8612
K14028	mdh1,mxaF	1115.36	44.1255	337.583	688.235	45.4145	0	0	0	0	0
K14029	mdh2,mxaI	1429.08	53.1915	599.291	744.681	31.9149	0	0	0	0	0
K16157	mmoX	1405.44	36.0531	525.617	764.073	79.6964	0	0	0	0	0
K16158	mmoY	1058.66	46.2725	591.26	204.39	216.743	0	0	0	0	0
K16159	mmoZ	1304.93	31.3725	505.882	570.885	196.791	0	0	0	0	0
K16160	mmoB	1217.49	23.6407	449.173	543.735	200.946	0	0	0	0	0
K16161	mmoC	1043.74	41.1494	537.482	316.229	148.876	0	0	0	0	0
K16162	mmoD	1258.64	38.835	411.003	774.554	34.244	0	0	0	0	0
K03520	coxL,cutL	166.616	6.71007	4.5867	105.493	49.8269	0	0	939.061	773.549	1712.61
K00198	cooS	3839.31	3005.26	616.52	166.904	50.624	0	0	0	0	0
K14138	acsB	4071.21	3289.12	610.89	134.46	36.7353	0	0	0	0	0
K00656	formate c-acetyltransferase	1243.06	502.478	186.194	407.62	146.77	0	0	0	0	0
K00394	aprA	2432.88	1593.4	391.551	158.285	289.648	0	0	0	0	0
K00395	aprB	5105.62	3598.58	671.515	336.8	498.73	0	0	0	0	0
K11180	dsrA	4993.55	3012.64	751.136	402.461	827.319	0	0	0	0	0
K11181	dsrB	4409.75	2673.84	697.88	373.976	664.05	0	0	0	0	0
K00370	narG	460.272	38.5169	343.915	23.3981	54.4416	0	0	0	0	0
K00371	narH	3631.09	85.8762	436.47	2294.18	814.557	0	0	0	0	0
K02567	napA	972.329	733.415	195.762	10.8795	32.2723	0	0	0	0	0
K02568	napB	0	0	0	0	0	0	0	0	0	0
K00362	nirB	2350.16	136.454	357.346	1445.35	411.003	0	0	394.931	622.284	1017.21
K00363	nirD	3917.41	0	163.55	2552.72	1201.14	0	0	267.696	192.493	460.189
K03385	nrfA	615.727	0.669344	3.4678	471.734	139.856	0	0	0	0	0
K00368	nirK	0	0	0	0	0	0	0	0	0	0
K04561	norB	162.832	0	110.24	52.5926	0	0	0	0	0	0
K02305	norC	75.6501	0	75.6501	0	0	0	0	0	0	0
K00376	nosZ	13.6202	0	0	13.6202	0	0	0	0	0	0
K02586	nifD	477.308	146.208	121.596	25.9744	183.53	0	0	0	0	0
K02591	nifK	495.254	189.476	126.759	34.6394	144.38	0	0	0	0	0
K02588	nifH	1021.27	287.353	115.386	305.365	313.162	0	0	0	0	0
K00531	anfG	0	0	0	0	0	0	0	0	0	0
K10535	hao	0	0	0	0	0	0	0	0	0	0
K00123	formate dehydrogenase	5651.92	891.584	1571.93	2209.85	978.547	1.70172	5.53968	2646.34	7956.08	10609.7
K00124	formate dehydrogenase	1515.19	52.5499	329.277	873.302	260.057	0	0	1280.29	4271.14	5551.43
K00125	formate dehydrogenase	755.724	376.463	146.964	155.012	77.2851	0	0	0	0	0
K00126	formate dehydrogenase	4895.9	87.032	839.922	2550.05	1418.89	0	0	0	64.3939	64.3939
K00127	formate dehydrogenase	1819.9	42.3609	452.991	1052.61	271.946	0.829187	0.863558	1342.27	5645.48	6989.44
K00200	methanogenesis: Fmd/Fwd	2027.13	177.436	488.562	1202.27	158.868	0	0	0.603865	0.603865	1.20773
K00201	methanogenesis: Fmd/Fwd	1297.09	179.092	451.549	592.131	74.3149	0	0	0	0	0
K00202	methanogenesis: Fmd/Fwd	804.358	255.556	396.932	112.355	39.5154	14.9813	11.236	0	0	26.2172
K00203	methanogenesis: Fmd/Fwd	297.591	116.55	81.5851	16.317	83.1391	0	0	0	0	0
K00204	methanogenesis: Fmd/Fwd	152.439	103.659	22.3577	4.06504	22.3577	0	0	0	0	0
K00205	methanogenesis: Fmd/Fwd	545.822	280.335	106.401	24.5773	134.509	0	0	0	0	0
K11260	methanogenesis: Fmd/Fwd	214.736	54.1667	62.5	0	98.0691	0	0	0	0	0
K11261	methanogenesis: Fmd/Fwd	669.797	491.393	153.365	25.0391	0	0	0	0	0	0
K00672	methanogenesis: Ftr	446.069	76.9852	295.295	38.0315	35.7579	0	0	0	0	0
K01499	methanogenesis: Mch	929.848	38.8489	370.044	466.75	54.2054	0	0	0	0	0
K00319	methanogenesis: Mtd	390.097	163.043	35.0242	15.7005	176.329	0	0	0	0	0
K13942	methanogenesis: Hmd	0	0	0	0	0	0	0	0	0	0
K00440	methanogenesis: Frh	60.4575	0	0	0	60.4575	0	0	0	0	0
K00441	methanogenesis: Frh	1442.71	694.384	267.617	219.14	261.569	0	0	312.119	2057.53	2369.65
K00442	methanogenesis: Frh	12.6582	0	0	0	12.6582	0	0	0	0	0
K00443	methanogenesis: Frh	28.2136	0	0	0	28.2136	0	0	0	0	0
K00320	methanogenesis: Mer	141.225	51.9211	25.9605	9.34579	53.9979	0	0	0	0	0
K00577	methanogenesis: Mtr	299.861	160.391	68.3403	18.1311	52.9986	0	0	0	0	0
K00578	methanogenesis: Mtr	211.221	112.211	42.9043	9.90099	46.2046	0	0	0	0	0
K00579	methanogenesis: Mtr	269.032	128.395	55.5556	7.40741	77.6741	0	0	0	0	0
K00580	methanogenesis: Mtr	326.418	193.638	67.7732	16.5975	48.4094	0	0	0	0	0
K00581	methanogenesis: Mtr	341.243	210.169	73.4463	10.1695	47.4576	0	0	0	0	0
K00582	methanogenesis: Mtr	82.1256	38.6473	33.8164	4.83092	4.83092	0	0	0	0	0
K00583	methanogenesis: Mtr	109.756	73.1707	16.2602	0	20.3252	0	0	0	0	0
K00584	methanogenesis: Mtr	233.333	126.882	49.4624	8.60215	48.3871	0	0	0	0	0
K00399	methanogenesis: Mcr	256.364	151.515	58.7879	6.06061	40	0	0	0	0	0
K00401	methanogenesis: Mcr	539.492	288.672	113.825	23.8442	113.151	0	0	0	0	0
K00402	methanogenesis: Mcr	613.058	335.889	101.634	24.9026	150.633	0	0	0	0	0
K03388	methanogenesis: Hdr	4333.44	2720.94	715.92	567.708	328.873	0	0	0	0	0
K03389	methanogenesis: Hdr	3336.85	2003.71	474.831	262.118	596.193	0	0	11.1483	1.11483	12.2631
K03390	methanogenesis: Hdr	2858.25	2174.33	353.44	101.454	229.035	0	0	0	0	0
K00925	acetate kinase	5366.61	1920.8	643.134	1792.38	1010.3	0	0	649.84	285.256	935.096
K00625	phosphotransacetylase	845.686	51.6485	346.388	340.49	107.159	0	0	644.399	247.638	892.038
K13788	phosphotransacetylase	2275.96	1920.34	260.313	27.9753	67.3305	0	0	0	0	0
K01895	AMP-forming acetyl-CoA synthetase	13375	7394.84	2626.88	1853.8	1499.52	17.2139	13.8635	2454.97	7922.03	10408.1
K00192	Cdh/ACDS	413.201	150.252	60.2903	43.4767	159.182	0	0	3.91645	0.435161	4.35161
K00193	Cdh/ACDS	919.344	344.194	144.148	155.801	275.202	0	0	0	0	0
K00194	Cdh/ACDS	4128.08	3192.07	635.356	117.474	183.185	0	0	0	0	0
K00195	Cdh/ACDS	1684.57	731.976	264.401	231.807	456.391	0	0	0	0	0
K00196	Cdh/ACDS	775.622	192.518	118.153	259.126	205.824	0	0	0	0	0
K00197	Cdh/ACDS	4712.36	3351.92	719.679	318.174	322.586	0	0	0	0	0
K00198	Cdh/ACDS	3839.31	3005.26	616.52	166.904	50.624	0	0	0	0	0
K14080	methanogenesis: Mta	0	0	0	0	0	0	0	0	0	0
K04480	methanogenesis: Mta	228.666	86.0448	23.1381	91.2839	28.1996	0	0	0	0	0
K14081	methanogenesis: Mta	181.265	91.2409	40.146	12.1655	37.7129	0	0	0	0	0
K14082	methanogenesis: Mtb/Mtm	0	0	0	0	0	0	0	0	0	0
K14083	methanogenesis: Mtb/Mtm	44.437	11.5646	2.72109	21.7935	8.35782	0	4.46144	0	0	4.46144
K14084	methanogenesis: Mtb/Mtm	22.7273	0	0	22.7273	0	0	0	0	0	0
K16176	methanogenesis: Mtb/Mtm	0	0	0	0	0	0	0	0	0	0
K16177	methanogenesis: Mtb/Mtm	0	0	0	0	0	0	0	0	0	0
K16178	methanogenesis: Mtb/Mtm	0	0	0	0	0	0	0	0	0	0
K16179	methanogenesis: Mtb/Mtm	0	0	0	0	0	0	0	0	0	0

## Sheet: ESOM bin percentages
Supplemental File 8. Total coverage of predicted genes annotated with a KEGG ID of potential interest.
In this worksheet, values are the percentages of FPK coverage partitioned into each ESOM bin.
KEGG ID	Description	combined-spring (total FPK coverage)	ESOM Bin 1 Methanobacteriaceae (FPK coverage as percentage of combined-spring)	ESOM Bin 2 Comamonadaceae / Xanthomonadaceae (FPK coverage as percentage of combined-spring)	ESOM Bin 3 Bacteroidetes (FPK coverage as percentage of combined-spring)	ESOM Bin 4 Methylococcaceae (FPK coverage as percentage of combined-spring)	ESOM Bin 5 Desulfovibrionales (FPK coverage as percentage of combined-spring)
K00336	Fe only hydrogenase	1949.47	0	0	0.0963471	0	0
K00436	hoxH, NAD-reducing hydrogenase	1938.79	0	0	0	0.274878	0
K06281	hyaB, hybC NiFe hydrogenase large subunit	834.273	0	0	0	0	0
K06282	hyaA,hybO NiFe hydrogenase small subunit	1029.37	0	0	0	0	0
K18008	hydA NiFe hydrogenase small subunit	419.018	0	0	0	0	1
K00437	hydB NiFe hydrogenase large subunit	2373.97	0	0	0	0	1
K00532	ferredoxin hydrogenase	0	NA	NA	NA	NA	NA
K00533	ferredoxin hydrogenase large subunit	25.7977	0	0	0	0	0
K01601	Rubisco large subunit	639.527	0	1	0	0	0
K10944	pmoA particulate methane monooxygenase	784.076	0	0	0	0.817556	0
K10945	pmoB particulate methane monooxygenase	791.465	0	0	0	0.816887	0
K10946	pmoC particulate methane monooxygenase	870.667	0	0	0	0.796325	0
K14028	mdh1,mxaF	1115.36	0	0	0	0	0
K14029	mdh2,mxaI	1429.08	0	0	0	0	0
K16157	mmoX	1405.44	0	0	0	0.10081	0
K16158	mmoY	1058.66	0	0	0	0.107631	0
K16159	mmoZ	1304.93	0	0	0	0	0
K16160	mmoB	1217.49	0	0	0	0.0970874	0
K16161	mmoC	1043.74	0	0	0	0.181964	0
K16162	mmoD	1258.64	0	0	0	0	0
K03520	coxL,cutL	166.616	0	0	0	0	0
K00198	cooS	3839.31	0	0	0	0	0.537156
K14138	acsB	4071.21	0	0	0	0	0.62355
K00656	formate c-acetyltransferase	1243.06	0.138426	0	0.181782	0	0
K00394	aprA	2432.88	0.00780138	0	0	0	0
K00395	aprB	5105.62	0.010672	0	0	0	0
K11180	dsrA	4993.55	0	0	0	0	0.466047
K11181	dsrB	4409.75	0	0	0	0	0.500391
K00370	narG	460.272	0	0	0	0	0
K00371	narH	3631.09	0	0	0	0	0
K02567	napA	972.329	0	0	0	0	0
K02568	napB	0	NA	NA	NA	NA	NA
K00362	nirB	2350.16	0	0	0	0	0
K00363	nirD	3917.41	0	0	0	0	0
K03385	nrfA	615.727	0	0	0	0	0
K00368	nirK	0	NA	NA	NA	NA	NA
K04561	norB	162.832	0	0	0	0	0
K02305	norC	75.6501	0	0	0	0	0
K00376	nosZ	13.6202	0	0	0	0	0
K02586	nifD	477.308	0.126299	0	0	0	0
K02591	nifK	495.254	0.507979	0	0	0	0
K02588	nifH	1021.27	0	0	0	0	0
K00531	anfG	0	NA	NA	NA	NA	NA
K10535	hao	0	NA	NA	NA	NA	NA
K00123	formate dehydrogenase	5651.92	0.0513116	0	0	0.0911972	0
K00124	formate dehydrogenase	1515.19	0	0	0	0.367945	0
K00125	formate dehydrogenase	755.724	0.412287	0	0	0	0
K00126	formate dehydrogenase	4895.9	0	0	0	0.10699	0
K00127	formate dehydrogenase	1819.9	0	0	0	0.302962	0
K00200	methanogenesis: Fmd/Fwd	2027.13	0	0	0	0.349724	0
K00201	methanogenesis: Fmd/Fwd	1297.09	0	0	0	0.466132	0
K00202	methanogenesis: Fmd/Fwd	804.358	0	0	0	0	0
K00203	methanogenesis: Fmd/Fwd	297.591	0	0	0	0	0
K00204	methanogenesis: Fmd/Fwd	152.439	0	0	0	0	0
K00205	methanogenesis: Fmd/Fwd	545.822	0	0	0	0	0
K11260	methanogenesis: Fmd/Fwd	214.736	0	0	0	0	0
K11261	methanogenesis: Fmd/Fwd	669.797	0	0	0	0	0
K00672	methanogenesis: Ftr	446.069	0	0	0	0	0
K01499	methanogenesis: Mch	929.848	0	0	0	0	0
K00319	methanogenesis: Mtd	390.097	0	0	0	0	0
K13942	methanogenesis: Hmd	0	NA	NA	NA	NA	NA
K00440	methanogenesis: Frh	60.4575	0	0	0	0	0
K00441	methanogenesis: Frh	1442.71	0.576154	0	0	0	0
K00442	methanogenesis: Frh	12.6582	0	0	0	0	0
K00443	methanogenesis: Frh	28.2136	0	0	0	0	0
K00320	methanogenesis: Mer	141.225	0	0	0	0	0
K00577	methanogenesis: Mtr	299.861	1	0	0	0	0
K00578	methanogenesis: Mtr	211.221	1	0	0	0	0
K00579	methanogenesis: Mtr	269.032	0.858129	0	0	0	0
K00580	methanogenesis: Mtr	326.418	1	0	0	0	0
K00581	methanogenesis: Mtr	341.243	0.950331	0	0	0	0
K00582	methanogenesis: Mtr	82.1256	1	0	0	0	0
K00583	methanogenesis: Mtr	109.756	1	0	0	0	0
K00584	methanogenesis: Mtr	233.333	0	0	0	0	0
K00399	methanogenesis: Mcr	256.364	0.319149	0	0	0	0
K00401	methanogenesis: Mcr	539.492	0.348683	0	0	0	0
K00402	methanogenesis: Mcr	613.058	0.255385	0	0	0	0
K03388	methanogenesis: Hdr	4333.44	0.0436548	0	0	0	0.484405
K03389	methanogenesis: Hdr	3336.85	0	0.210146	0	0	0.604696
K03390	methanogenesis: Hdr	2858.25	0	0	0	0	0.773086
K00925	acetate kinase	5366.61	0	0	0	0	0.404267
K00625	phosphotransacetylase	845.686	0	0	0	0	0
K13788	phosphotransacetylase	2275.96	0	0	0	0	1
K01895	AMP-forming acetyl-CoA synthetase	13375	0.0170995	0	0	0.0477189	0.194806
K00192	Cdh/ACDS	413.201	0	0	0	0	0
K00193	Cdh/ACDS	919.344	0	0	0	0	0
K00194	Cdh/ACDS	4128.08	0.000415155	0	0	0	0.625343
K00195	Cdh/ACDS	1684.57	0	0	0	0	0
K00196	Cdh/ACDS	775.622	0	0	0	0	0
K00197	Cdh/ACDS	4712.36	0.0384302	0	0	0	0.466732
K00198	Cdh/ACDS	3839.31	0	0	0	0	0.537156
K14080	methanogenesis: Mta	0	NA	NA	NA	NA	NA
K04480	methanogenesis: Mta	228.666	0.641906	0	0	0	0
K14081	methanogenesis: Mta	181.265	0.959732	0	0	0	0
K14082	methanogenesis: Mtb/Mtm	0	NA	NA	NA	NA	NA
K14083	methanogenesis: Mtb/Mtm	44.437	0	0	0	0	0
K14084	methanogenesis: Mtb/Mtm	22.7273	0	0	0	0	0
K16176	methanogenesis: Mtb/Mtm	0	NA	NA	NA	NA	NA
K16177	methanogenesis: Mtb/Mtm	0	NA	NA	NA	NA	NA
K16178	methanogenesis: Mtb/Mtm	0	NA	NA	NA	NA	NA
K16179	methanogenesis: Mtb/Mtm	0	NA	NA	NA	NA	NA
